# Supplementary material for: Long-read sequencing of nascent RNA reveals coupling among RNA processing events
Source: HighWire-hosted journal article supplement (doi:10.1101/gr.232025.117), 2018-06-14
Supplement: Supplemental_Tables.xlsx [file Supplemental_Tables.xlsx]

## Sheet: TableS1 (strains)
Number	Name	Genotype	Mating type	Organism	Parental Strain (h+ or mat alpha)	Reference	comment	Resistance
1	wild type 1	972	h-	S. pombe		I. Tolic lab	wild-type strain used also fro genome sequencing (Wood et al., Nature 2002)
7	wild type 2	prp5::KanMx-prp5-WT	h+	S. pombe	SP286 (h+/h+) spore selection by pON177	PMID: 22064476		G418
22	prp2-1	leu1.32 prp2-C387Y	h±	S. pombe		PMID: 12374752, originally from PMID: 10923022	grown in YES medium at 26°C or shifted to 37°C for 2 h
11	P20(WT)	leu1-32, ura4 DS/E, ade6-216, otr1R(SphI)::ura4+	h+	S. pombe		PMID: 25989903
14	P74(rrp6∆)	leu1-32, ura4, ade6-216, rrp6∆::kanMX6	h+	S. pombe	P20	PMID: 25989903

## Sheet: TableS2 (oligos)
Oligo name	Oligo sequence (5' -> 3')	Primed gene region	Used in	Figure	Experiment
SPACUNK4.10_ppA	TCATCGTTGTCGTTTTACGAA	downstream polyA cleavage site	RT	S1	enrichment assessment of non-polyadenylated nascent RNA
SPACUNK4.10_fwd	CTTCCCAATTTGGTTCCTGA	terminal exon	qPCR	S1	enrichment assessment of non-polyadenylated nascent RNA
SPACUNK4.10_rev	TGAACGACCGTATAACATAAGCA	terminal exon	qPCR	S1	enrichment assessment of non-polyadenylated nascent RNA
SPBC1773.10c_ppA	ACGCTAACTGACTCGCACCT	downstream polyA cleavage site	RT	S1	enrichment assessment of non-polyadenylated nascent RNA
SPBC1773.10c_fwd	GCTGCTTATAAACGCGAAGG	terminal exon	qPCR	S1	enrichment assessment of non-polyadenylated nascent RNA
SPBC1773.10c_rev	ACCAAGCGAGGAATCTTTCA	terminal exon	qPCR	S1	enrichment assessment of non-polyadenylated nascent RNA
SPAC20G4.06c_ppA	CCGACTCATCCGTTATCACA	downstream polyA cleavage site	RT	S1	enrichment assessment of non-polyadenylated nascent RNA
SPAC20G4.06c_fwd	CTCCTGATGTTGCTCCCATT	terminal exon	qPCR	S1	enrichment assessment of non-polyadenylated nascent RNA
SPAC20G4.06c_rev	CGGAGAAATCAGTTGCTTGG	terminal exon	qPCR	S1	enrichment assessment of non-polyadenylated nascent RNA
SPAC29E6.03c.1_Intron1_fwd	CAAGCGCGACGTGTTCATTA	adjacent exon	PCR	S2, S5	validation nascent RNA-seq & prp2-1 phenotype
SPAC29E6.03c.1_Intron1_rev	TGTGCTTCGTCAAACGCATC	adjacent exon	PCR	S2, S5	validation nascent RNA-seq & prp2-1 phenotype
SPCC4F11.05.1_Intron1_fwd	TCGATTTACTCAGTTTTTCGATT	adjacent exon	PCR	S2, S5	validation nascent RNA-seq & prp2-1 phenotype
SPCC4F11.05.1_Intron1_rev	TTTTTGCCTTTTTCTTGTTCA	adjacent exon	PCR	S2, S5	validation nascent RNA-seq & prp2-1 phenotype
SPAC1556.06.2_Intron1_fwd	TTCGAAACCTCGCCAACTGT	adjacent exon	PCR	S2, S5	validation nascent RNA-seq & prp2-1 phenotype
SPAC1556.06.2_Intron1_rev	CACTATCGCTAATGGCATGGG	adjacent exon	PCR	S2, S5	validation nascent RNA-seq & prp2-1 phenotype
SPCC1840.12.1_Intron1_fwd	TCCTCAGTACCAGGAAATGCT	adjacent exon	PCR	S2, S5	validation nascent RNA-seq & prp2-1 phenotype
SPCC1840.12.1_Intron1_rev	GAGCAACGATAGCTGCAATG	adjacent exon	PCR	S2, S5	validation nascent RNA-seq & prp2-1 phenotype
SPBC1A4.01.1_Intron1_fwd	AATTTGGCTCAATGGACCTG	adjacent exon	PCR	S2, S5	validation nascent RNA-seq & prp2-1 phenotype
SPBC1A4.01.1_Intron1_rev	CCCAGCTGATATTCGCAAAG	adjacent exon	PCR	S2, S5	validation nascent RNA-seq & prp2-1 phenotype
SPBC29A3.10c.1_Intron4_fwd	CGCTCCTACTGCTCCAAAAT	adjacent exon	PCR	S2, S5	validation nascent RNA-seq & prp2-1 phenotype
SPBC29A3.10c.1_Intron4_rev	TCGGAAAATAAAAGGCAAAA	adjacent exon	PCR	S2, S5	validation nascent RNA-seq & prp2-1 phenotype
SPAC23C4.05c.1_Intron1_fwd	GGAGCGCTTTTGGCATTAGG	adjacent exon	PCR	S2, S5, S7	validation nascent RNA-seq & prp2-1 phenotype; evaluation prp2-1 splicing phenotype 26 and 37 degree; validation polyA cleavage & splicing status association
SPAC23C4.05c.1_Intron1_rev	AGCTTTCGTTGAGGCCAAGA	adjacent exon	PCR	S2, S5, S7	validation nascent RNA-seq & prp2-1 phenotype; evaluation prp2-1 splicing phenotype 26 and 37 degree; validation polyA cleavage & splicing status association
SPAC4F10.02.1_Intron1_fwd	GCAGAACATTACATGTCTCACGG	adjacent exon	PCR	S2, S5	validation nascent RNA-seq & prp2-1 phenotype
SPAC4F10.02.1_Intron1_rev	GGAGAATCAGTGTGCGTTGC	adjacent exon	PCR	S2, S5	validation nascent RNA-seq & prp2-1 phenotype
SPCC1223.10c.1_Intron3_fwd	ATATATTTGAAGGCTCATGCCAAC	adjacent exon	PCR	S2, S5	validation nascent RNA-seq & prp2-1 phenotype
SPCC1223.10c.1_Intron3_rev	CGATTTGGATTCAGAGATTTGG	adjacent exon	PCR	S2, S5	validation nascent RNA-seq & prp2-1 phenotype
SPAC18B11.09c.1_Intron1_fwd	TCCGACAGAAATGACTCGTACT	adjacent exon	PCR	S2, S5	validation nascent RNA-seq & prp2-1 phenotype
SPAC18B11.09c.1_Intron1_rev	CGCTTGAGTCAACTCCTCGT	adjacent exon	PCR	S2, S5	validation nascent RNA-seq & prp2-1 phenotype
SPBP22H7.09c.1_Intron1_fwd	TGCTCAAACGCAGCATTATT	adjacent exon	PCR	S2, S5	validation nascent RNA-seq & prp2-1 phenotype
SPBP22H7.09c.1_Intron1_rev	TGCTTTCTAATTCCGACTTCA	adjacent exon	PCR	S2, S5	validation nascent RNA-seq & prp2-1 phenotype
SPBC16C6.08c.1_Intron4_fwd	CTGAGGAACCTCCAAAGGAA	adjacent exon	PCR	S2, S5	validation nascent RNA-seq & prp2-1 phenotype
SPBC16C6.08c.1_Intron4_rev	GACTTGTCGCCCTGCTCTAC	adjacent exon	PCR	S2, S5	validation nascent RNA-seq & prp2-1 phenotype
SPBC2F12.05c.1_Intron2_fwd	AGCTATCGGACAGCCTGAAA	adjacent exon	PCR	S2, S5	validation nascent RNA-seq & prp2-1 phenotype
SPBC2F12.05c.1_Intron2_rev	TTTATCATAAGCATTCACGTCCA	adjacent exon	PCR	S2, S5	validation nascent RNA-seq & prp2-1 phenotype
SPCC132.02.1_Intron2_fwd	AGGTGTGCCTGACAAAGCTC	adjacent exon	PCR	S2, S5	validation nascent RNA-seq & prp2-1 phenotype
SPCC132.02.1_Intron2_rev	TCGAAGAAACGCATTGGTAA	adjacent exon	PCR	S2, S5	validation nascent RNA-seq & prp2-1 phenotype
SPAC29E6.08.1_Intron2_fwd	GCTACATGCACGTAATGCAGAA	adjacent exon	PCR	S2, S5, 5	validation nascent RNA-seq & prp2-1 phenotype; evaluation prp2-1 splicing phenotype 26 and 37 degree
SPAC29E6.08.1_Intron2_rev	GAGCTTGGAGTCATCCTCGG	adjacent exon	PCR	S2, S5, 5	validation nascent RNA-seq & prp2-1 phenotype; evaluation prp2-1 splicing phenotype 26 and 37 degree
SPBC3B9.15c.1_Intron1_fwd	TTCAAAGCGGTACTGCCTAC	adjacent exon	PCR	S2, S5, 5	validation nascent RNA-seq & prp2-1 phenotype; evaluation prp2-1 splicing phenotype 26 and 37 degree
SPBC3B9.15c.1_Intron1_rev	AAGGATGAAAAGGAGGCAATAATA	adjacent exon	PCR	S2, S5, 5	validation nascent RNA-seq & prp2-1 phenotype; evaluation prp2-1 splicing phenotype 26 and 37 degree
SPBC337.14.1_Intron1_fwd	GGTTGTTGTGCATAAAGAGCA	adjacent exon	PCR	S2, S5	validation nascent RNA-seq & prp2-1 phenotype
SPBC337.14.1_Intron1_rev	GCCTCTGAAACCGTCAACAT	adjacent exon	PCR	S2, S5	validation nascent RNA-seq & prp2-1 phenotype
SPAC17G8.14c.1_Intron2_fwd	ACGTCAACAGTTTAGCGTGA	adjacent exon	PCR	S2, S5	validation nascent RNA-seq & prp2-1 phenotype
SPAC17G8.14c.1_Intron2_rev	TGCAGAGTCCATAATCAGCAA	adjacent exon	PCR	S2, S5	validation nascent RNA-seq & prp2-1 phenotype
SPBC1703.09.1_Intron1_fwd	ACAACAGAACAGAGTTGCTGC	adjacent exon	PCR	S2, S5, S7	validation nascent RNA-seq & prp2-1 phenotype; validation polyA cleavage & splicing status association
SPBC1703.09.1_Intron1_rev	TGACCAATCTTGAAGGGGTCG	adjacent exon	PCR	S2, S5, S7	validation nascent RNA-seq & prp2-1 phenotype; validation polyA cleavage & splicing status association
SPBC887.14c.1_Intron1_fwd	TAGGCCTTGCTCGTGAATCT	adjacent exon	PCR	S2, S5, S7	validation nascent RNA-seq & prp2-1 phenotype; validation polyA cleavage & splicing status association
SPBC887.14c.1_Intron1_rev	TCCCATTTTCTGGAACAGGA	adjacent exon	PCR	S2, S5, S7	validation nascent RNA-seq & prp2-1 phenotype; validation polyA cleavage & splicing status association
SPBC17A3.03c.1_Intron1_fwd	ATTGGCCAGTCGGAAATCGT	adjacent exon	PCR	S2, S5	validation nascent RNA-seq & prp2-1 phenotype
SPBC17A3.03c.1_Intron1_rev	TTGCACTGTCGGAGACTCAC	adjacent exon	PCR	S2, S5	validation nascent RNA-seq & prp2-1 phenotype
SPBC25H2.11c.1_Intron4_fwd	CTGCAATATTTGGAGGGAAA	adjacent exon	PCR	S2, S5	validation nascent RNA-seq & prp2-1 phenotype
SPBC25H2.11c.1_Intron4_rev	CAGGTGCATCTCTTTTGCTG	adjacent exon	PCR	S2, S5	validation nascent RNA-seq & prp2-1 phenotype
SPBC17G9.08c.1_Intron2_fwd	TGGACCTGGTCTAATCAATCGT	adjacent exon	PCR	S2, S5	validation nascent RNA-seq & prp2-1 phenotype
SPBC17G9.08c.1_Intron2_rev	AGATGCATGGGCATTGGGAA	adjacent exon	PCR	S2, S5	validation nascent RNA-seq & prp2-1 phenotype
SPAC22A12.08c.1_Intron2_fwd	CCTGTCCGACTTGGTTTGGA	adjacent exon	PCR	S2, S5	validation nascent RNA-seq & prp2-1 phenotype
SPAC22A12.08c.1_Intron2_rev	CCTTGACCTAAGCGGGGAAG	adjacent exon	PCR	S2, S5	validation nascent RNA-seq & prp2-1 phenotype
SPBC3D6.08c.1_Intron2_fwd	AAGGTCCTTTGATCAATTTG	adjacent exon	PCR	S2, S5	validation nascent RNA-seq & prp2-1 phenotype
SPBC3D6.08c.1_Intron2_rev	TCTCGCCCCGAACAATATAC	adjacent exon	PCR	S2, S5	validation nascent RNA-seq & prp2-1 phenotype
SPAC23C11.11.1_Intron4_fwd	TATCCCAAGCGGGACTGGTA	adjacent exon	PCR	S2, S5	validation nascent RNA-seq & prp2-1 phenotype; evaluation prp2-1 splicing phenotype 26 and 37 degree
SPAC23C11.11.1_Intron4_rev	CGGATGGGCCATAGCTTCTT	adjacent exon	PCR	S2, S5	validation nascent RNA-seq & prp2-1 phenotype; evaluation prp2-1 splicing phenotype 26 and 37 degree
SPCC569.03.1_Intron1_fwd	CTTCCATCAAAGGTGAAATGG	adjacent exon	PCR	S2, S5	validation nascent RNA-seq & prp2-1 phenotype; evaluation prp2-1 splicing phenotype 26 and 37 degree
SPCC569.03.1_Intron1_rev	TTTGCATCGTTTGAGCCATA	adjacent exon	PCR	S2, S5	validation nascent RNA-seq & prp2-1 phenotype; evaluation prp2-1 splicing phenotype 26 and 37 degree
SPAC20H4.11c.1_Intron1_fwd	ATTGTTGGCGATGGTGCTTG	adjacent exon	PCR	S2, S5, S7	validation nascent RNA-seq & prp2-1 phenotype; validation polyA cleavage & splicing status association
SPAC20H4.11c.1_Intron1_rev	TCCATCAACCTCGACATCGG	adjacent exon	PCR	S2, S5, S7	validation nascent RNA-seq & prp2-1 phenotype; validation polyA cleavage & splicing status association
SPAC4D7.10c.1_Intron2_fwd	GGGAAGGAATTGAGTTTGGACG	adjacent exon	PCR	S2, S5	validation nascent RNA-seq & prp2-1 phenotype
SPAC4D7.10c.1_Intron2_rev	GCGCCATCTTGTTGCTCAAA	adjacent exon	PCR	S2, S5	validation nascent RNA-seq & prp2-1 phenotype
SPBC26H8.10.1_Intron1_fwd	CCTGTCAAAGTCGGGCTTG	adjacent exon	PCR	S2, S5, S7	validation nascent RNA-seq & prp2-1 phenotype; validation polyA cleavage & splicing status association
SPBC26H8.10.1_Intron1_rev	AACCGTTTGCAGAATAATGACA	adjacent exon	PCR	S2, S5, S7	validation nascent RNA-seq & prp2-1 phenotype; validation polyA cleavage & splicing status association
SPBC21.06c.1_Intron9_fwd	AAGAGAACGCATCTAGCTTCC	adjacent exon	PCR	S2, S5	validation nascent RNA-seq & prp2-1 phenotype
SPBC21.06c.1_Intron9_rev	CAATTGAACATCAGGCGTTTT	adjacent exon	PCR	S2, S5	validation nascent RNA-seq & prp2-1 phenotype
SPAC1805.01c.1_Intron2_fwd	GCAAGCAGGTTCAACGTACA	adjacent exon	PCR	S2, S5	validation nascent RNA-seq & prp2-1 phenotype
SPAC1805.01c.1_Intron2_rev	AGCTTAACTCGAGCAGCGTT	adjacent exon	PCR	S2, S5	validation nascent RNA-seq & prp2-1 phenotype
SPAC3F10.18c_intron_fwd	TTACCACTGCCAAGATGCGT	adjacent exon	PCR	S2, S5	validation polyA cleavage & splicing status association
SPAC3F10.18c_intron_rev	TTTGAGTAAATGTTCTGCGTCCT	adjacent exon	PCR	S2, S5	validation polyA cleavage & splicing status association
SPAC1805.11c_intron_fwd	GTCCCCAAGGACAAAGCCAT	adjacent exon	PCR	S2, S5	validation polyA cleavage & splicing status association
SPAC1805.11c_intron_rev	GAATGGCGGCAGTTTCAACC	adjacent exon	PCR	S2, S5	validation polyA cleavage & splicing status association
SPCC1322.11_intron_fwd	CTTAACCGTCTCCCTGCTGC	adjacent exon	PCR	S2, S5	validation polyA cleavage & splicing status association
SPCC1322.11_intron_rev	ACCCTTCTTGACGGTAGCAA	adjacent exon	PCR	S2, S5	validation polyA cleavage & splicing status association
SPNCRNA.445_intron_fwd	AGTTTCGTTGTGCTGGTGAT	adjacent exon	PCR	S2, S5	validation polyA cleavage & splicing status association
SPNCRNA.445_intron_rev	CACAAGCAAATGCAGTAAGCCT	adjacent exon	PCR	S2, S5	validation polyA cleavage & splicing status association
SPAC1805.11c_termEx_fwd	AACATGGTTGAAACTGCCGC	terminal exon	qPCR	7	rrp6-delta total RNA-seq validation
SPAC1805.11c_termEx_rev	CGGACCACACGAGAGTGAAT	terminal exon	qPCR	7	rrp6-delta total RNA-seq validation
SPAC1805.11c_polyA_fwd	GATGAAGCTGGATGGTGGCT	polyA cleavage site	qPCR	7	rrp6-delta total RNA-seq validation
SPAC1805.11c_polyA_rev	ACAAACCGCTGGAATAGCCT	polyA cleavage site	qPCR	7	rrp6-delta total RNA-seq validation
SPAC1805.11c_ppA_fwd	AGGCTATTCCAGCGGTTTGT	downstream polyA cleavage site	qPCR	7	rrp6-delta total RNA-seq validation
SPAC1805.11c_ppA_rev	TCGAAAGGTCCCTGTTACGC	downstream polyA cleavage site	qPCR, RT	7, S7	rrp6-delta total RNA-seq validation; validation polyA cleavage & splicing status association
SPAC3F10.18c_ppA_rev	CGATCATCCGAACCGTTCAT	downstream polyA cleavage site	RT	S7	validation polyA cleavage & splicing status association
SPCC1322.11_ppA_rev	TGTACCGCAACTCTTTAAGCA	downstream polyA cleavage site	RT	S7	validation polyA cleavage & splicing status association
SPNCRNA.445_ppA_rev	TTAGGAGCGGCAAAAACACT	downstream polyA cleavage site	RT	S7	validation polyA cleavage & splicing status association
SPBC887.14c_ppA_rev	TAGAAGGTGGCCTTGTAACAATTA	downstream polyA cleavage site	RT	S7	validation polyA cleavage & splicing status association
SPAC23C4.05c_ppA_rev	TCGACCCCAATGTAACAACAGA	downstream polyA cleavage site	RT	S7	validation polyA cleavage & splicing status association
SPAC20H4.11c_ppA_rev	TCCTGAAATCAAAACGCAACAA	downstream polyA cleavage site	RT	S7	validation polyA cleavage & splicing status association
SPBC1703.09_ppA_rev	CAAACGAACGCCAAAATCGC	downstream polyA cleavage site	RT	S7	validation polyA cleavage & splicing status association
SPBC26H8.10_ppA_rev	ACTTATGCATTGACCAGCACG	downstream polyA cleavage site	RT	S7	validation polyA cleavage & splicing status association
3‘end_DNA_adaptor	/5rApp/NNNNNCTGTAGGCACCATCAAT/3ddC/		RNA ligation		long read sequencing cDNA library
3’ SMART CDS Primer II_adap	AAGCAGTGGTATCAACGCAGAGTACATTGATGGTGCCTACAG		RT		long read sequencing cDNA library
SMARTer II A Oligonucleotide (Clontech, Cat. Nos. 634925 & 634926)	AAGCAGTGGTATCAACGCAGAGTACXXXXX		RT		long read sequencing cDNA library
5’ PCR Primer II A (Clontech, Cat. Nos. 634925 & 634926)	NA		PCR		long read sequencing cDNA library (PCR WT30 samples)
5’PCR_BC1	TCAGACGATGCGTCATAAGCAGTGGTATCAACGCAGAGTAC		PCR		long read sequencing cDNA library (PCR WT37 sample 1)
5’PCR_BC2	CTATACATGACTCTGCAAGCAGTGGTATCAACGCAGAGTAC		PCR		long read sequencing cDNA library (PCR WT37 sample 2)
5’PCR_BC3	TACTAGAGTAGCACTCAAGCAGTGGTATCAACGCAGAGTAC		PCR		long read sequencing cDNA library (PCR WT37 sample 3)
5’PCR_BC4	TGTGTATCAGTACATGAAGCAGTGGTATCAACGCAGAGTAC		PCR		long read sequencing cDNA library (PCR prp2-1 sample 1)
5’PCR_BC5	ACACGCATGACACACTAAGCAGTGGTATCAACGCAGAGTAC		PCR		long read sequencing cDNA library (PCR prp2-1 sample 2)
5’PCR_BC6	GATCTCTACTATATGCAAGCAGTGGTATCAACGCAGAGTAC		PCR		long read sequencing cDNA library (PCR prp2-1 sample 3)

## Sheet: TableS3 (massspec)
# enrichment calculation: ratio of chrom/CP peptides >2; if no CP counts, mock CP peptide count of 1; same for CP over chromatinclassification of protein detection: 2 - CP protein enriched compared to both chrom preps; 1 - to only one; 0 - no enrichment in CP & chrom; -1 - enrichment in one chrom fraction; -2 enriched over CP in both chrom
# classification of protein detection: 2 - CP protein enriched compared to both chrom preps; 1 - to only one; 0 - no enrichment in CP & chrom; -1 - enrichment in one chrom fraction; -2 enriched over CP in both chrom
# CP - cytoplasm, chrom - chromatin
Protein_GI_accession	SystematicID	Name	unique_peptide_Chrom1	unique_peptides_Chrom2	unique_peptides_CP	ratio.chrom1.CP	ratio.chrom2.CP	ratio.CP.chrom1	ratio.CP.chrom2	enrichment.chrom	enrichment.CP	enrichment combined
1706961	SPBC16H5.11c	type II protein arginine N-methyltransferase Skb1	10	5	1	10	5	0.1	0.2	-2	0	-2
1749478	SPAC9.07c	GTPase Rbg1 (predicted)	6	4	2	3	2	0.333333	0.5	-2	0	-2
3327876	SPAC1751.03	translation initiation factor eIF3m	12	13	5	2.4	2.6	0.416667	0.384615	-2	0	-2
19075209	SPCC330.09	Ribosome biogenesis protein enp2 homolog	8	8	0	8	8	0.125	0.125	-2	0	-2
19075218	SPCC320.11c	60S ribosome subunit biogenesis protein nip7	6	2	0	6	2	0.166667	0.5	-2	0	-2
19075219	SPCC320.10	Signal recognition particle subunit srp72	17	6	1	17	6	0.0588235	0.166667	-2	0	-2
19075298	SPCC1682.05c	Signal recognition particle subunit srp68	12	11	3	4	3.66667	0.25	0.272727	-2	0	-2
19075305	SPCC1682.12c	Probable ubiquitin carboxyl-terminal hydrolase 16	4	4	0	4	4	0.25	0.25	-2	0	-2
19075324	SPCC4G3.14	DnaJ homolog 1, mitochondrial	2	4	1	2	4	0.5	0.25	-2	0	-2
19075343	SPCC364.01	Uncharacterized protein C364.01	2	2	0	2	2	0.5	0.5	-2	0	-2
19075378	SPCC1672.07	Uncharacterized WD repeat-containing protein C1672.07	23	6	0	23	6	0.0434783	0.166667	-2	0	-2
19075390	SPCC1183.07	rRNA biogenesis protein rrp5	44	48	6	7.33333	8	0.136364	0.125	-2	0	-2
19075551	SPCC825.01	Uncharacterized ABC transporter ATP-binding protein C825.01	23	35	0	23	35	0.0434783	0.0285714	-2	0	-2
19075642	SPCC1322.14c	Vacuolar transporter chaperone 4	5	7	2	2.5	3.5	0.4	0.285714	-2	0	-2
19075660	SPCC338.07c	N-terminal acetyltransferase A complex subunit nat1	19	22	3	6.33333	7.33333	0.157895	0.136364	-2	0	-2
19075669	SPCC1281.05	Chromatin structure-remodeling complex subunit rsc7	8	2	0	8	2	0.125	0.5	-2	0	-2
19075681	SPCC622.09	Histone H2B-alpha	5	6	2	2.5	3	0.4	0.333333	-2	0	-2
19075703	SPCC11E10.07c	Translation initiation factor eIF-2B subunit alpha	5	3	1	5	3	0.2	0.333333	-2	0	-2
19075832	SPCC285.03	ATP-dependent RNA helicase dbp6	7	3	0	7	3	0.142857	0.333333	-2	0	-2
19076031	SPCC1494.06c	ATP-dependent RNA helicase dbp9	13	8	0	13	8	0.0769231	0.125	-2	0	-2
19076047	SPCC1827.01c	Uncharacterized protein C1827.01c	6	4	0	6	4	0.166667	0.25	-2	0	-2
19076049	SPCC1827.03c	Putative peroxisomal-coenzyme A synthetase	11	9	4	2.75	2.25	0.363636	0.444444	-2	0	-2
19076051	SPCC1827.05c	Uncharacterized RNA-binding protein C1827.05c	3	2	0	3	2	0.333333	0.5	-2	0	-2
19076064	SPCP1E11.11	Pumilio homology domain family member 6	17	10	2	8.5	5	0.117647	0.2	-2	0	-2
19111884	SPBC660.13c	Replication factor A protein 1	11	3	1	11	3	0.0909091	0.333333	-2	0	-2
19111947	SPBC106.06	T-complex protein 1 subunit delta	6	6	1	6	6	0.166667	0.166667	-2	0	-2
19111989	SPBC428.19c	U3 small nucleolar RNA-associated protein 15	13	9	0	13	9	0.0769231	0.111111	-2	0	-2
19112135	SPBC713.04c	Periodic tryptophan protein 2 homolog	16	7	0	16	7	0.0625	0.142857	-2	0	-2
19112159	SPBC646.09c	Eukaryotic translation initiation factor 3 subunit E	9	7	2	4.5	3.5	0.222222	0.285714	-2	0	-2
19112160	SPBC646.10c	Nucleolar protein 56	28	27	0	28	27	0.0357143	0.037037	-2	0	-2
19112210	SPBC1734.01c	Pre-rRNA-processing protein esf1	10	5	0	10	5	0.1	0.2	-2	0	-2
19112316	SPBC3D6.12	Uncharacterized WD repeat-containing protein C3D6.12	28	16	0	28	16	0.0357143	0.0625	-2	0	-2
19112358	SPBC8D2.03c	Histone H4	9	6	3	3	2	0.333333	0.5	-2	0	-2
19112359	SPBC8D2.04	Histone H3.3; Histone H3.1/H3.2	3	3	0	3	3	0.333333	0.333333	-2	0	-2
19112391	SPBP22H7.02c	Multiple RNA-binding domain-containing protein 1	10	6	0	10	6	0.1	0.166667	-2	0	-2
19112432	SPBC83.08	RuvB-like helicase 2	17	15	5	3.4	3	0.294118	0.333333	-2	0	-2
19112438	SPBC83.14c	Replication factor C subunit 5	4	2	0	4	2	0.25	0.5	-2	0	-2
19112439	SPBC83.15	Ribosome biogenesis protein nsa1	7	6	0	7	6	0.142857	0.166667	-2	0	-2
19112440	SPBC83.16c	Mitochondrial outer membrane protein C83.16c	2	3	0	2	3	0.5	0.333333	-2	0	-2
19112464	SPBC28F2.11	HMG box-containing protein C28F2.11	16	13	0	16	13	0.0625	0.0769231	-2	0	-2
19112515	SPBC11G11.05	DNA-directed RNA polymerase I subunit rpa34	4	6	1	4	6	0.25	0.166667	-2	0	-2
19112538	SPBC9B6.04c	Elongation factor Tu, mitochondrial	5	9	1	5	9	0.2	0.111111	-2	0	-2
19112541	SPBC9B6.07	Ribosomal RNA-processing protein 1 homolog	6	5	0	6	5	0.166667	0.2	-2	0	-2
19112550	SPBC28E12.05	Pre-rRNA-processing protein esf2	5	2	0	5	2	0.2	0.5	-2	0	-2
19112572	SPBP16F5.06	Uncharacterized RNA-binding protein P16F5.06	14	9	0	14	9	0.0714286	0.111111	-2	0	-2
19112597	SPBC1A4.03c	DNA topoisomerase 2	22	20	0	22	20	0.0454545	0.05	-2	0	-2
19112601	SPBC1A4.07c	SPBC1A4.07c	6	5	0	6	5	0.166667	0.2	-2	0	-2
19112612	SPBP23A10.08	Actin-related protein 4	3	2	0	3	2	0.333333	0.5	-2	0	-2
19112636	SPBC29A3.16	Ribosome biogenesis regulatory protein homolog	8	5	2	4	2.5	0.25	0.4	-2	0	-2
19112658	SPBC23G7.08c	Probable Rho-GTPase-activating protein 7	5	7	1	5	7	0.2	0.142857	-2	0	-2
19112670	SPBC1711.05	LisH domain-containing protein C1711.05	4	6	0	4	6	0.25	0.166667	-2	0	-2
19112681	SPBC1711.16	Uncharacterized WD repeat-containing protein C17D11.16	15	12	2	7.5	6	0.133333	0.166667	-2	0	-2
19112690	SPBC17G9.09	Eukaryotic translation initiation factor 2 subunit gamma	15	11	4	3.75	2.75	0.266667	0.363636	-2	0	-2
19112709	SPBC14C8.14c	DNA polymerase V	18	5	0	18	5	0.0555556	0.2	-2	0	-2
19112721	SPBC21H7.04	ATP-dependent RNA helicase dbp7	3	2	0	3	2	0.333333	0.5	-2	0	-2
19112729	SPBC16H5.10c	Probable pre-mRNA-splicing factor ATP-dependent RNA helicase prp43	22	19	0	22	19	0.0454545	0.0526316	-2	0	-2
19112748	SPBC24C6.02	ATP-dependent rRNA helicase spb4	16	8	0	16	8	0.0625	0.125	-2	0	-2
19112818	SPBC2G2.13c	Protein pim1	15	11	0	15	11	0.0666667	0.0909091	-2	0	-2
19112831	SPBC365.10	SPBC365.10	13	3	0	13	3	0.0769231	0.333333	-2	0	-2
19112854	SPBC2G5.01	UPF0674 endoplasmic reticulum membrane protein C2G5.01	2	3	0	2	3	0.5	0.333333	-2	0	-2
19112865	SPBC25B2.05	Ribosomal RNA assembly protein mis3	9	4	0	9	4	0.111111	0.25	-2	0	-2
19112899	SPBC4F6.07c	ATP-dependent RNA helicase mak5	15	6	0	15	6	0.0666667	0.166667	-2	0	-2
19112905	SPBC4F6.13c	Ribosome biogenesis protein erb1	13	10	2	6.5	5	0.153846	0.2	-2	0	-2
19112906	SPBC4F6.14	Uncharacterized RNA-binding protein C4F6.14	17	9	0	17	9	0.0588235	0.111111	-2	0	-2
19113021	SPBC2D10.10c	rRNA 2'-O-methyltransferase fibrillarin	7	12	1	7	12	0.142857	0.0833333	-2	0	-2
19113092	SPBC4C3.05c	DNA-directed RNA polymerase I complex large subunit Nuc1	31	30	15	2.06667	2	0.483871	0.5	-2	0	-2
19113101	SPBC405.06	DnaJ protein homolog xdj1	6	5	1	6	5	0.166667	0.2	-2	0	-2
19113107	SPBC609.05	FACT complex subunit pob3	15	4	0	15	4	0.0666667	0.25	-2	0	-2
19113115	SPBC776.08c	U3 small nucleolar RNA-associated protein 22	21	15	0	21	15	0.047619	0.0666667	-2	0	-2
19113157	SPBC20F10.01	H/ACA ribonucleoprotein complex subunit 1	3	2	1	3	2	0.333333	0.5	-2	0	-2
19113171	SPBC17D11.05	Eukaryotic translation initiation factor 3 subunit A	32	43	12	2.66667	3.58333	0.375	0.27907	-2	0	-2
19113180	SPBC17D1.06	ATP-dependent RNA helicase dbp3	26	30	1	26	30	0.0384615	0.0333333	-2	0	-2
19113218	SPBC4B4.09	U1, Pre-mRNA-processing factor 39	4	4	1	4	4	0.25	0.25	-2	0	-2
19113318	SPBP8B7.19	FACT complex subunit spt16	32	15	0	32	15	0.03125	0.0666667	-2	0	-2
19113319	SPBP8B7.20c	Putative ribosomal RNA methyltransferase nop2	13	12	3	4.33333	4	0.230769	0.25	-2	0	-2
19113332	SPBC19F5.02c	U3 small nucleolar RNA-associated protein 4	22	11	0	22	11	0.0454545	0.0909091	-2	0	-2
19113335	SPBC19F5.05c	Pescadillo homolog	19	17	2	9.5	8.5	0.105263	0.117647	-2	0	-2
19113351	SPBC13G1.09	Uncharacterized protein C13G1.09	9	3	0	9	3	0.111111	0.333333	-2	0	-2
19113352	SPBC13G1.10c	Putative helicase mug81	3	2	0	3	2	0.333333	0.5	-2	0	-2
19113396	SPBC23E6.04c	U3 small nucleolar RNA-associated protein 10	42	31	0	42	31	0.0238095	0.0322581	-2	0	-2
19113399	SPBC23E6.07c	Replication factor C subunit 1	7	6	0	7	6	0.142857	0.166667	-2	0	-2
19113426	SPBC1604.06c	Uncharacterized protein C1604.06c	5	5	0	5	5	0.2	0.2	-2	0	-2
19113443	SPBC26H8.08c	GTPase grn1	9	8	0	9	8	0.111111	0.125	-2	0	-2
19113457	SPBC3B9.07c	DNA-directed RNA polymerase I subunit rpa43	7	2	0	7	2	0.142857	0.5	-2	0	-2
19113475	SPBC215.06c	UPF0743 protein C215.06c	3	2	0	3	2	0.333333	0.5	-2	0	-2
19113481	SPBC215.12	114 kDa U5 small nuclear ribonucleoprotein component homolog	9	2	0	9	2	0.111111	0.5	-2	0	-2
19113486	SPBC1347.02	FK506-binding protein 39 kDa	11	13	5	2.2	2.6	0.454545	0.384615	-2	0	-2
19113505	SPBC56F2.04	U3 small nucleolar RNA-associated protein 20	30	20	1	30	20	0.0333333	0.05	-2	0	-2
19113586	SPBC543.06c	ATP-dependent RNA helicase dbp8	14	8	0	14	8	0.0714286	0.125	-2	0	-2
19113605	SPBC244.02c	U3 small nucleolar RNA-associated protein 6	11	4	0	11	4	0.0909091	0.25	-2	0	-2
19113616	SPBC1539.10	Nucleolar protein 16	6	4	1	6	4	0.166667	0.25	-2	0	-2
19113623	SPBC1289.07c	DNA-directed RNA polymerases I and III subunit RPAC1	9	5	1	9	5	0.111111	0.2	-2	0	-2
19113789	SPAC18B11.06	Uncharacterized protein C18B11.06	5	3	0	5	3	0.2	0.333333	-2	0	-2
19113804	SPAC12G12.06c	Probable RNA 3'-terminal phosphate cyclase-like protein	4	5	0	4	5	0.25	0.2	-2	0	-2
19113808	SPAC12G12.02	rRNA-processing protein efg1	6	3	0	6	3	0.166667	0.333333	-2	0	-2
19113831	SPAC31A2.07c	ATP-dependent RNA helicase dbp10	10	11	0	10	11	0.1	0.0909091	-2	0	-2
19113857	SPAC24H6.07	40S ribosomal protein S9-A	13	2	1	13	2	0.0769231	0.5	-2	0	-2
19113888	SPAC2F7.05c	Probable eukaryotic translation initiation factor 5	13	11	0	13	11	0.0769231	0.0909091	-2	0	-2
19113945	SPAC22F3.08c	ATP-dependent RNA helicase rok1	3	6	1	3	6	0.333333	0.166667	-2	0	-2
19113960	SPAPJ696.02	SH3 domain-containing protein PJ696.02	5	2	0	5	2	0.2	0.5	-2	0	-2
19113966	SPAC22G7.05	Protein kri1	17	11	0	17	11	0.0588235	0.0909091	-2	0	-2
19113992	SPAC16C9.06c	Regulator of nonsense transcripts 1 homolog	4	6	0	4	6	0.25	0.166667	-2	0	-2
19113994	SPAC2G11.02	Probable nucleolar pre-ribosomal-associated protein 2	17	4	0	17	4	0.0588235	0.25	-2	0	-2
19114003	SPAC2G11.11c	Probable ATP-dependent RNA helicase prh1	8	6	0	8	6	0.125	0.166667	-2	0	-2
19114018	SPAC23G3.06	Nucleolar protein 58	23	24	0	23	24	0.0434783	0.0416667	-2	0	-2
19114022	SPAC23G3.10c	SWI/SNF and RSC complexes subunit ssr3	12	4	0	12	4	0.0833333	0.25	-2	0	-2
19114026	SPAC22H12.02	Transcription initiation factor TFIID subunit 14	4	2	0	4	2	0.25	0.5	-2	0	-2
19114041	SPAC1687.11	AdoMet-dependent rRNA methyltransferase spb1	10	4	0	10	4	0.1	0.25	-2	0	-2
19114057	SPAC222.06	Protein mak16	2	4	0	2	4	0.5	0.25	-2	0	-2
19114070	SPAC821.05	Eukaryotic translation initiation factor 3 subunit H	9	7	0	9	7	0.111111	0.142857	-2	0	-2
19114099	SPAC23C4.15	DNA-directed RNA polymerases I, II, and III subunit RPABC1	3	2	0	3	2	0.333333	0.5	-2	0	-2
19114114	SPAC1A6.10	Uncharacterized protein C1A6.10	4	6	0	4	6	0.25	0.166667	-2	0	-2
19114126	SPCC1223.07c	ATP-dependent RNA helicase drs1	11	10	0	11	10	0.0909091	0.1	-2	0	-2
19114129	SPAC56F8.02	Uncharacterized protein C56F8.02	3	7	0	3	7	0.333333	0.142857	-2	0	-2
19114130	SPAC56F8.03	Eukaryotic translation initiation factor 5B	23	36	1	23	36	0.0434783	0.0277778	-2	0	-2
19114135	SPAC56F8.09	Ribosomal RNA-processing protein 8	3	3	0	3	3	0.333333	0.333333	-2	0	-2
19114196	SPAC1565.05	Uncharacterized protein C1565.05	15	8	1	15	8	0.0666667	0.125	-2	0	-2
19114214	SPAC6F12.16c	Uncharacterized helicase C6F12.16c	10	3	1	10	3	0.1	0.333333	-2	0	-2
19114238	SPAC20G8.09c	UPF0202 protein C20G8.09c	35	23	2	17.5	11.5	0.0571429	0.0869565	-2	0	-2
19114287	SPAC57A7.06	Uncharacterized protein C57A7.06	12	4	0	12	4	0.0833333	0.25	-2	0	-2
19114330	SPAP27G11.13c	H/ACA ribonucleoprotein complex subunit 3	3	3	0	3	3	0.333333	0.333333	-2	0	-2
19114347	SPAC343.14c	Probable translation initiation factor eIF-2B subunit beta	10	4	0	10	4	0.1	0.25	-2	0	-2
19114362	SPAC664.02c	Probable actin-related protein 8	5	2	0	5	2	0.2	0.5	-2	0	-2
19114366	SPAC664.06	ribosomal protein L7-like Rlp7 involved in ribosome biogenesis (predicted)	10	6	2	5	3	0.2	0.333333	-2	0	-2
19114368	SPAC664.08c	Protein bfr2	9	2	0	9	2	0.111111	0.5	-2	0	-2
19114394	SPAC17A5.14	5'-3' exoribonuclease 1	6	4	1	6	4	0.166667	0.25	-2	0	-2
19114432	SPAPB1A10.06c	Putative ATP-dependent RNA helicase PB1A10.06c	15	7	0	15	7	0.0666667	0.142857	-2	0	-2
19114443	SPAC140.02	Protein gar2	9	17	3	3	5.66667	0.333333	0.176471	-2	0	-2
19114487	SPAC17H9.05	Probable rRNA-processing protein ebp2	7	5	0	7	5	0.142857	0.2	-2	0	-2
19114546	SPAC23C11.03	U3 small nucleolar ribonucleoprotein protein mpp10	8	5	0	8	5	0.125	0.2	-2	0	-2
19114572	SPAC1783.05	Chromodomain helicase hrp1	33	23	0	33	23	0.030303	0.0434783	-2	0	-2
19114583	SPAC18G6.07c	Multicopy suppressor of ras1	7	3	0	7	3	0.142857	0.333333	-2	0	-2
19114622	SPAC13G7.08c	Pre-rRNA-processing protein crb3/ipi3	3	2	0	3	2	0.333333	0.5	-2	0	-2
19114696	SPAC19A8.08	Nonsense-mediated mRNA decay protein 2	3	3	0	3	3	0.333333	0.333333	-2	0	-2
19114697	SPAC19A8.07c	U3 small nucleolar ribonucleoprotein protein imp4	6	7	0	6	7	0.166667	0.142857	-2	0	-2
19114747	SPAC823.08c	ATP-dependent rRNA helicase rrp3	13	12	0	13	12	0.0769231	0.0833333	-2	0	-2
19114773	SPAC4F8.12c	Pre-mRNA-splicing factor spp42	14	10	2	7	5	0.142857	0.2	-2	0	-2
19114780	SPAC4F8.04	Brix domain-containing protein C4F8.04	7	4	0	7	4	0.142857	0.25	-2	0	-2
19114808	SPAC6F6.03c	Nucleolar GTP-binding protein 2	12	11	2	6	5.5	0.166667	0.181818	-2	0	-2
19114865	SPAC8F11.04	Putative ribosome biogenesis protein C8F11.04	7	10	0	7	10	0.142857	0.1	-2	0	-2
19114948	SPAC24C9.11	Suppressor of glycerol defect protein 1	8	2	0	8	2	0.125	0.5	-2	0	-2
19114993	SPAC3G9.09c	Eukaryotic translation initiation factor 2 subunit alpha	16	15	5	3.2	3	0.3125	0.333333	-2	0	-2
19115023	SPAC6G9.02c	Pumilio domain-containing protein C6G9.02c	6	6	0	6	6	0.166667	0.166667	-2	0	-2
19115055	SPAC2E1P5.05	Uncharacterized WD repeat-containing protein C2E1P5.05	8	6	0	8	6	0.125	0.166667	-2	0	-2
19115063	SPAC26A3.08	Small nuclear ribonucleoprotein-associated protein B	4	2	0	4	2	0.25	0.5	-2	0	-2
19115065	SPAC26A3.10	Uncharacterized protein C26A3.10	2	2	0	2	2	0.5	0.5	-2	0	-2
19115082	SPAC959.03c	Probable U3 small nucleolar RNA-associated protein 7	13	6	0	13	6	0.0769231	0.166667	-2	0	-2
19115130	SPAC16E8.06c	Nucleolar protein 12	11	7	0	11	7	0.0909091	0.142857	-2	0	-2
19115169	SPAC17G6.10	SWI/SNF and RSC complexes subunit ssr1	8	3	0	8	3	0.125	0.333333	-2	0	-2
19115180	SPAC1142.04	Uncharacterized NOC2 family protein C1142.04	15	4	0	15	4	0.0666667	0.25	-2	0	-2
19115197	SPAC8C9.15c	Probable translation initiation factor eIF-2B subunit epsilon	11	7	1	11	7	0.0909091	0.142857	-2	0	-2
19115294	SPAC2F3.03c	DNA-directed RNA polymerase I subunit rpa49	15	6	0	15	6	0.0666667	0.166667	-2	0	-2
19115394	SPAC694.02	Uncharacterized helicase C694.02	62	49	4	15.5	12.25	0.0645161	0.0816327	-2	0	-2
19115400	SPAC1F7.02c	ATP-dependent RNA helicase has1	20	16	1	20	16	0.05	0.0625	-2	0	-2
19115402	SPAC1F7.04	GTP-binding protein rho1	2	2	1	2	2	0.5	0.5	-2	0	-2
19115415	SPAC21E11.06	Probable translation initiation factor eIF-2B subunit delta	5	2	0	5	2	0.2	0.5	-2	0	-2
19115447	SPAC27F1.06c	Probable peptidyl-prolyl cis-trans isomerase C27F1.06c	12	7	1	12	7	0.0833333	0.142857	-2	0	-2
19115458	SPAC23D3.09	SWI/SNF and RSC complexes subunit arp42	5	2	0	5	2	0.2	0.5	-2	0	-2
19115532	SPAC27D7.14c	Tetratricopeptide repeat protein 1	15	5	0	15	5	0.0666667	0.2	-2	0	-2
19115539	SPAC637.09	Uncharacterized exonuclease C637.09	4	2	0	4	2	0.25	0.5	-2	0	-2
19115629	SPAC1782.10c	H/ACA ribonucleoprotein complex subunit 2	3	2	0	3	2	0.333333	0.5	-2	0	-2
19115644	SPAC22F8.09	Uncharacterized protein C22F8.09	2	5	0	2	5	0.5	0.2	-2	0	-2
19115661	SPAC4F10.06	BUD22 family protein C4F10.06	4	4	0	4	4	0.25	0.25	-2	0	-2
19115664	SPAC4F10.09c	Uncharacterized protein C4F10.09c	21	9	0	21	9	0.047619	0.111111	-2	0	-2
19115734	SPAC890.04c	Ribosome biogenesis protein ytm1	13	8	2	6.5	4	0.153846	0.25	-2	0	-2
19115735	SPAC890.05	Protein pxr1	6	7	0	6	7	0.166667	0.142857	-2	0	-2
19115773	SPAC1250.01	Chromatin structure-remodeling complex subunit snf21	27	10	0	27	10	0.037037	0.1	-2	0	-2
19115786	SPAC29A4.08c	prp19, Cell cycle control protein cwf8	3	4	0	3	4	0.333333	0.25	-2	0	-2
19115790	SPAC29A4.04c	H/ACA ribonucleoprotein complex subunit 4	13	14	1	13	14	0.0769231	0.0714286	-2	0	-2
19115815	SPAC19D5.05c	U3 small nucleolar ribonucleoprotein protein imp3	4	5	0	4	5	0.25	0.2	-2	0	-2
19115874	SPAC4D7.09	Probable translation initiation factor eIF-2B subunit gamma	6	5	0	6	5	0.166667	0.2	-2	0	-2
19115879	SPAC3G6.01	Chromodomain helicase hrp3	15	13	0	15	13	0.0666667	0.0769231	-2	0	-2
19115882	SPAC3G6.04	RNA-binding protein rnp24	10	7	0	10	7	0.1	0.142857	-2	0	-2
63054423	SPCC14G10.02	Uncharacterized protein C14G10.02	21	13	0	21	13	0.047619	0.0769231	-2	0	-2
63054427	SPCC16A11.02	Probable U3 small nucleolar RNA-associated protein 13	16	7	0	16	7	0.0625	0.142857	-2	0	-2
63054485	SPAC1F3.01	Exosome complex exonuclease rrp6	6	4	1	6	4	0.166667	0.25	-2	0	-2
63054568	SPAC32A11.04c	Probable eukaryotic translation initiation factor 2 subunit beta	19	17	4	4.75	4.25	0.210526	0.235294	-2	0	-2
63054571	SPAC4A8.16c	Eukaryotic translation initiation factor 3 subunit C	35	31	6	5.83333	5.16667	0.171429	0.193548	-2	0	-2
63054658	SPAC1952.02	Uncharacterized protein C1952.02	4	4	0	4	4	0.25	0.25	-2	0	-2
63054700	SPBC31E1.06	Ribosome biogenesis protein BMS1 homolog	24	23	0	24	23	0.0416667	0.0434783	-2	0	-2
68006105	SPAC29B12.01	Putative DNA helicase ino80	14	6	0	14	6	0.0714286	0.166667	-2	0	-2
162312100	SPCC18B5.01c	Brefeldin A resistance protein	3	2	0	3	2	0.333333	0.5	-2	0	-2
162312178	SPBC651.01c	Probable nucleolar GTP-binding protein 1	22	16	2	11	8	0.0909091	0.125	-2	0	-2
162312434	SPAC20H4.01	U3 small nucleolar RNA-associated protein 5	20	14	0	20	14	0.05	0.0714286	-2	0	-2
162312442	SPAC1B9.03c	Brix domain-containing protein C1B9.03c	7	4	0	7	4	0.142857	0.25	-2	0	-2
162312474	SPAC3G9.15c	rRNA-processing protein fcf2	2	3	0	2	3	0.5	0.333333	-2	0	-2
295442754	SPCC736.12c		4	2	0	4	2	0.25	0.5	-2	0	-2
295442842	SPBP23A10.07		33	13	5	6.6	2.6	0.151515	0.384615	-2	0	-2
295442844	SPBC29A3.06		16	6	0	16	6	0.0625	0.166667	-2	0	-2
295442876	SPBC13E7.01		8	3	0	8	3	0.125	0.333333	-2	0	-2
295442890	SPBC31F10.12		3	3	0	3	3	0.333333	0.333333	-2	0	-2
82828	SPCC576.11		2	0	0	2	0	0.5	1	-1	0	-1
173404	SPCC622.08c		3	0	0	3	0	0.333333	1	-1	0	-1
173479	SPAC4A8.12c		3	0	0	3	0	0.333333	1	-1	0	-1
173515	SPCC24B10.21		2	0	0	2	0	0.5	1	-1	0	-1
218554	SPAC23G3.01		28	3	5	5.6	0.6	0.178571	1.66667	-1	0	-1
1072102	SPBC1105.04c		5	0	0	5	0	0.2	1	-1	0	-1
1136789	SPCC1450.04		3	0	0	3	0	0.333333	1	-1	0	-1
1154952	SPAC22G7.06c		3	0	0	3	0	0.333333	1	-1	0	-1
1199960	SPAC4A8.11c		7	0	0	7	0	0.142857	1	-1	0	-1
1229151	SPAC12G12.04		2	0	0	2	0	0.5	1	-1	0	-1
1519460	SPBC11C11.08		2	0	0	2	0	0.5	1	-1	0	-1
1695641	SPAC56E4.04c		3	0	0	3	0	0.333333	1	-1	0	-1
1749724	SPBC582.07c		0	2	1	0	2	1	0.5	-1	0	-1
1834323	SPCC1442.10c		4	0	0	4	0	0.25	1	-1	0	-1
1850766	SPAC23C11.02c		2	0	0	2	0	0.5	1	-1	0	-1
11466044	SPMIT.08	Ribosomal protein S3, mitochondrial	2	0	0	2	0	0.5	1	-1	0	-1
12644208	SPBC354.01		0	2	1	0	2	1	0.5	-1	0	-1
14578567	SPCC16C4.08c		0	2	0	0	2	1	0.5	-1	0	-1
19075194	SPCC613.06	60S ribosomal protein L9-B	2	0	0	2	0	0.5	1	-1	0	-1
19075268	SPCC553.06	Uncharacterized protein C553.06	2	0	0	2	0	0.5	1	-1	0	-1
19075307	SPCC1682.14	60S ribosomal protein L19-B	8	0	0	8	0	0.125	1	-1	0	-1
19075315	SPCC306.07c	Putative ribosome biogenesis protein C306.07c	0	4	0	0	4	1	0.25	-1	0	-1
19075368	SPCC962.03c	Importin subunit alpha-1	0	2	1	0	2	1	0.5	-1	0	-1
19075369	SPCC962.04	40S ribosomal protein S12-A	3	0	0	3	0	0.333333	1	-1	0	-1
19075373	SPCC1672.02c	Switch-activating protein 1	8	5	4	2	1.25	0.5	0.8	-1	0	-1
19075398	SPCC31H12.05c	Serine/threonine-protein phosphatase PP1-2	0	2	0	0	2	1	0.5	-1	0	-1
19075418	SPCC16C4.08c	Shk1 kinase-binding protein 15	3	0	0	3	0	0.333333	1	-1	0	-1
19075421	SPCC16C4.11	Serine/threonine-protein kinase pef1	0	3	0	0	3	1	0.333333	-1	0	-1
19075456	SPCC1020.04c	DNA-directed RNA polymerases I, II, and III subunit RPABC2	2	0	0	2	0	0.5	1	-1	0	-1
19075480	SPCC63.06	Uncharacterized WD repeat-containing protein C63.06	0	2	0	0	2	1	0.5	-1	0	-1
19075501	SPCC16A11.14	Chromatin structure-remodeling complex subunit sfh1	6	0	0	6	0	0.166667	1	-1	0	-1
19075512	SPCC24B10.09	40S ribosomal protein S17-B	2	0	0	2	0	0.5	1	-1	0	-1
19075560	SPCC1259.04	Uncharacterized protein C1259.04	3	0	0	3	0	0.333333	1	-1	0	-1
19075581	SPCC4B3.09c	60 ribosomal protein L12, mitochondrial	2	0	0	2	0	0.5	1	-1	0	-1
19075587	SPCC4B3.03c	Uncharacterized protein C4B3.03c	2	0	0	2	0	0.5	1	-1	0	-1
19075594	SPCC550.02c	Pre-mRNA-splicing factor slt11	2	0	0	2	0	0.5	1	-1	0	-1
19075595	SPCC550.03c	Uncharacterized helicase C550.03c	2	0	0	2	0	0.5	1	-1	0	-1
19075643	SPCC1322.15		2	0	0	2	0	0.5	1	-1	0	-1
19075713	SPCC188.11	Pre-mRNA-processing protein 45	3	0	0	3	0	0.333333	1	-1	0	-1
19075774	SPCC663.13c	Uncharacterized N-acetyltransferase C663.13c	3	0	0	3	0	0.333333	1	-1	0	-1
19075784	SPCC417.07c	Microtubule organizer protein 1	3	0	0	3	0	0.333333	1	-1	0	-1
19075802	SPCC1450.03	Uncharacterized protein C1450.03	0	2	0	0	2	1	0.5	-1	0	-1
19075884	SPCC18.05c	Uncharacterized WD repeat-containing protein C18.05c	3	0	0	3	0	0.333333	1	-1	0	-1
19075891	SPCC18.12c	rRNA-processing protein utp23	0	6	0	0	6	1	0.166667	-1	0	-1
19075954	SPCC126.11c	Uncharacterized RNA-binding protein C126.11c	2	0	0	2	0	0.5	1	-1	0	-1
19075966	SPCC1620.08	Probable succinyl-CoA ligase [GDP-forming] subunit beta, mitochondrial	0	2	0	0	2	1	0.5	-1	0	-1
19075991	SPCC1919.09	Eukaryotic translation initiation factor 6	4	0	0	4	0	0.25	1	-1	0	-1
19076010	SPCC1840.11	Exosome complex component csl4	2	0	0	2	0	0.5	1	-1	0	-1
19076061	SPCP1E11.08	Ribosome biogenesis protein nsa2	0	5	0	0	5	1	0.2	-1	0	-1
19111899	SPBC800.06	Ribosome biogenesis protein Brix homolog	0	9	0	0	9	1	0.111111	-1	0	-1
19111927	SPBC1271.15c	Translation initiation factor IF-2, mitochondrial	2	0	0	2	0	0.5	1	-1	0	-1
19111929	SPBC1271.13	60S ribosomal protein L8, mitochondrial	0	2	0	0	2	1	0.5	-1	0	-1
19111955	SPBC106.14c	Protein sda1	4	0	0	4	0	0.25	1	-1	0	-1
19111981	SPBC428.11	O-acetylhomoserine (thiol)-lyase	0	3	1	0	3	1	0.333333	-1	0	-1
19112009	SPBC1685.13	Non-classical export protein 2 homolog	3	0	0	3	0	0.333333	1	-1	0	-1
19112079	SPBC119.06	Protein sco1	0	2	0	0	2	1	0.5	-1	0	-1
19112119	SPBC530.14c	Protein kinase dsk1	3	0	0	3	0	0.333333	1	-1	0	-1
19112141	SPBC713.10	Mitochondrial import inner membrane translocase subunit tim16	0	2	1	0	2	1	0.5	-1	0	-1
19112152	SPBC646.02	Cell cycle control protein cwf11	9	0	0	9	0	0.111111	1	-1	0	-1
19112158	SPBC646.08c	Oxysterol-binding protein-like protein 1	0	2	1	0	2	1	0.5	-1	0	-1
19112180	SPBP35G2.13c	SWR complex protein 2	2	0	0	2	0	0.5	1	-1	0	-1
19112184	SPBC146.03c	Structural maintenance of chromosomes protein 4	2	0	0	2	0	0.5	1	-1	0	-1
19112207	SPBC337.14	DNA-directed RNA polymerase II subunit rpb4	3	0	0	3	0	0.333333	1	-1	0	-1
19112224	SPBC1734.15	Chromatin structure-remodeling complex subunit rsc4	6	0	0	6	0	0.166667	1	-1	0	-1
19112298	SPBC651.08c	DNA-directed RNA polymerase III subunit rpc1	7	0	0	7	0	0.142857	1	-1	0	-1
19112301	SPBC651.11c	AP-3 complex subunit mu	4	0	0	4	0	0.25	1	-1	0	-1
19112310	SPBC3D6.06c	Ribose-phosphate pyrophosphokinase 4	0	2	1	0	2	1	0.5	-1	0	-1
19112370	SPBC8D2.16c	Uncharacterized protein C8D2.16c	2	0	0	2	0	0.5	1	-1	0	-1
19112379	SPBC17A3.05c	Uncharacterized J domain-containing protein C17A3.05c	0	2	0	0	2	1	0.5	-1	0	-1
19112388	SPBC691.04	ATP-dependent RNA helicase mss116, mitochondrial	0	3	1	0	3	1	0.333333	-1	0	-1
19112396	SPBP22H7.07	Pre-mRNA-splicing factor prp5	2	0	0	2	0	0.5	1	-1	0	-1
19112421	SPBC11B10.09	Cell division control protein 2	0	2	0	0	2	1	0.5	-1	0	-1
19112457	SPBC28F2.04c	Pre-mRNA-splicing factor spf27	2	0	0	2	0	0.5	1	-1	0	-1
19112465	SPBC28F2.12	DNA-directed RNA polymerase II subunit rpb1	20	6	4	5	1.5	0.2	0.666667	-1	0	-1
19112498	SPBC2F12.10	60S ribosomal protein L35, mitochondrial	0	2	0	0	2	1	0.5	-1	0	-1
19112503	SPBC2F12.04		7	2	2	3.5	1	0.285714	1	-1	0	-1
19112512	SPBC11G11.02c	Actin cytoskeleton-regulatory complex protein end3	4	0	0	4	0	0.25	1	-1	0	-1
19112516	SPBC11G11.06c	Small nuclear ribonucleoprotein E	2	0	0	2	0	0.5	1	-1	0	-1
19112519	SPBC18H10.03	Eukaryotic translation initiation factor 3 subunit G	4	12	5	0.8	2.4	1.25	0.416667	-1	0	-1
19112552	SPBC3H7.15	Casein kinase I homolog hhp1	3	0	0	3	0	0.333333	1	-1	0	-1
19112573	SPBP16F5.07	AP-1 complex subunit mu-1	0	2	0	0	2	1	0.5	-1	0	-1
19112584	SPBC16E9.10c	Uncharacterized AAA domain-containing protein C16E9.10c	2	0	0	2	0	0.5	1	-1	0	-1
19112609	SPBP23A10.05	SWI/SNF and RSC complexes subunit ssr4	2	0	0	2	0	0.5	1	-1	0	-1
19112642	SPBC18E5.04		8	0	0	8	0	0.125	1	-1	0	-1
19112662	SPBC23G7.12c	26S protease regulatory subunit 8 homolog	0	3	0	0	3	1	0.333333	-1	0	-1
19112671	SPBC1711.06		15	4	3	5	1.33333	0.2	0.75	-1	0	-1
19112707	SPBC14C8.12	DNA-directed RNA polymerases I, II, and III subunit RPABC3	4	0	0	4	0	0.25	1	-1	0	-1
19112711	SPBC14C8.16c	37S ribosomal protein S35, mitochondrial	0	2	1	0	2	1	0.5	-1	0	-1
19112732	SPBC16H5.07c	Major serine/threonine-protein phosphatase PP2A-2 catalytic subunit	0	2	1	0	2	1	0.5	-1	0	-1
19112767	SPBC19G7.09	Ubiquitin-like-specific protease 1	0	2	0	0	2	1	0.5	-1	0	-1
19112774	SPBC19G7.16	Transcription factor iws1	2	0	0	2	0	0.5	1	-1	0	-1
19112788	SPBC1921.03c	mRNA export factor mex67	6	0	0	6	0	0.166667	1	-1	0	-1
19112825	SPBC365.04c	Uncharacterized RNA-binding protein C365.04c	0	4	0	0	4	1	0.25	-1	0	-1
19112837	SPBC365.16	Uncharacterized membrane protein C365.16	0	2	0	0	2	1	0.5	-1	0	-1
19112841	SPBC29A10.04	Structural maintenance of chromosomes protein 1	4	0	0	4	0	0.25	1	-1	0	-1
19112847	SPBC29A10.10c	Uncharacterized ATP-dependent helicase C29A10.10c	2	0	0	2	0	0.5	1	-1	0	-1
19112870	SPBC25B2.10	Universal stress protein A family protein C25B2.10	0	2	0	0	2	1	0.5	-1	0	-1
19112881	SPBC6B1.10	Pre-mRNA-processing factor 17	2	0	0	2	0	0.5	1	-1	0	-1
19112889	SPBC3E7.10	Probable methionine aminopeptidase 1	0	2	1	0	2	1	0.5	-1	0	-1
19112893	SPBC3E7.14	Probable small nuclear ribonucleoprotein F	3	0	0	3	0	0.333333	1	-1	0	-1
19112909	SPBC4F6.17c	Heat shock protein 78, mitochondrial	2	6	3	0.666667	2	1.5	0.5	-1	0	-1
19112958	SPBC19C7.10	HTH APSES-type DNA-binding domain-containing protein C19C7.10	2	0	0	2	0	0.5	1	-1	0	-1
19112972	SPBP4H10.06c	Structural maintenance of chromosomes protein 2	3	0	0	3	0	0.333333	1	-1	0	-1
19112989	SPBC1703.02	Chromatin structure-remodeling complex subunit rsc9	7	0	0	7	0	0.142857	1	-1	0	-1
19113001	SPBC1703.14c	DNA topoisomerase 1	17	0	0	17	0	0.0588235	1	-1	0	-1
19113054	SPBC13E7.07	Uncharacterized protein C13E7.07	0	4	0	0	4	1	0.25	-1	0	-1
19113116	SPBC776.09	Putative ATP-dependent RNA helicase ste13	7	8	4	1.75	2	0.571429	0.5	-1	0	-1
19113125	SPBC776.17	Ribosomal RNA-processing protein 7	6	0	0	6	0	0.166667	1	-1	0	-1
19113137	SPBC19F8.03c	ENTH domain-containing protein C19F8.03c	2	0	0	2	0	0.5	1	-1	0	-1
19113142	SPBC19F8.08		10	0	0	10	0	0.1	1	-1	0	-1
19113170	SPBC17D11.04c	PHD finger protein C17D11.04c	3	0	0	3	0	0.333333	1	-1	0	-1
19113183	SPBC11C11.02	Septation protein imp2	6	0	0	6	0	0.166667	1	-1	0	-1
19113189	SPBC11C11.07	60S ribosomal protein L18-A	6	2	2	3	1	0.333333	1	-1	0	-1
19113197	SPBC3B8.09	Uncharacterized protein C3B8.09	4	0	0	4	0	0.25	1	-1	0	-1
19113213	SPBC4B4.04	Eukaryotic translation initiation factor 2A	2	0	0	2	0	0.5	1	-1	0	-1
19113214	SPBC4B4.05	Probable small nuclear ribonucleoprotein G	2	0	0	2	0	0.5	1	-1	0	-1
19113216	SPAC56F8.08	U1 small nuclear ribonucleoprotein usp102	0	3	0	0	3	1	0.333333	-1	0	-1
19113229	SPBC2G2.08	C-1-tetrahydrofolate synthase, mitochondrial	11	3	3	3.66667	1	0.272727	1	-1	0	-1
19113269	SPBC887.03c	Nucleolar complex-associated protein 3	5	0	0	5	0	0.2	1	-1	0	-1
19113365	SPBC31F10.11c	Pre-mRNA-splicing factor clf1	5	0	0	5	0	0.2	1	-1	0	-1
19113367	SPBC31F10.13c	Protein hir1	4	0	0	4	0	0.25	1	-1	0	-1
19113368	SPBC31F10.14c	Histone transcription regulator 3 homolog	6	0	0	6	0	0.166667	1	-1	0	-1
19113404	SPBC211.02c	Pre-mRNA-splicing factor syf1	3	0	0	3	0	0.333333	1	-1	0	-1
19113423	SPBC1604.09c	RNA exonuclease 4	0	3	0	0	3	1	0.333333	-1	0	-1
19113445	SPBC26H8.10	Exosome complex exonuclease dis3	4	0	0	4	0	0.25	1	-1	0	-1
19113463	SPBC3B9.13c	60S acidic ribosomal protein P1-alpha 3	2	0	0	2	0	0.5	1	-1	0	-1
19113464	SPBC3B9.14c	60S ribosomal protein L3, mitochondrial	0	2	0	0	2	1	0.5	-1	0	-1
19113479	SPBC215.10	Uncharacterized hydrolase C215.10	0	2	0	0	2	1	0.5	-1	0	-1
19113517	SPBC1861.08c	U2 small nuclear ribonucleoprotein A'	4	0	0	4	0	0.25	1	-1	0	-1
19113534	SPBC3F6.04c	Probable nucleolar complex protein 14	8	0	0	8	0	0.125	1	-1	0	-1
19113551	SPBC16G5.10	Exosome complex component rrp42	3	0	0	3	0	0.333333	1	-1	0	-1
19113554	SPBC16G5.13	Uncharacterized protein C16G5.13	2	0	0	2	0	0.5	1	-1	0	-1
19113562	SPBC16A3.19	Probable chromatin modification-related protein eaf7	2	0	0	2	0	0.5	1	-1	0	-1
19113576	SPBC16A3.05c	Poly(A)+ RNA export protein	2	0	0	2	0	0.5	1	-1	0	-1
19113595	SPBC16C6.05	Translation machinery-associated protein 22	0	2	0	0	2	1	0.5	-1	0	-1
19113774	SPAC1F5.11c	Uncharacterized PI3/PI4-kinase family protein C1F5.11c	2	0	0	2	0	0.5	1	-1	0	-1
19113815	SPAC630.08c	C-4 methylsterol oxidase	0	2	1	0	2	1	0.5	-1	0	-1
19113868	SPAC227.02c	Ribosomal RNA-processing protein 15	0	3	0	0	3	1	0.333333	-1	0	-1
19113895	SPAC2F7.13c	Tryptophanyl-tRNA synthetase, cytoplasmic	0	2	0	0	2	1	0.5	-1	0	-1
19113922	SPAC1F3.07c	Chromatin structure-remodeling complex subunit rsc58	3	0	0	3	0	0.333333	1	-1	0	-1
19113991	SPAC16C9.05	Uncharacterized protein C16C9.05	2	0	0	2	0	0.5	1	-1	0	-1
19114016	SPAC23G3.04	Uncharacterized protein C23G3.04	6	0	0	6	0	0.166667	1	-1	0	-1
19114033	SPAC1687.03c	Replication factor C subunit 4	0	4	0	0	4	1	0.25	-1	0	-1
19114065	SPAC222.14c	Protein sey1	0	2	0	0	2	1	0.5	-1	0	-1
19114076	SPAC821.11	Probable gamma-glutamyl phosphate reductase	0	2	0	0	2	1	0.5	-1	0	-1
19114081	SPAC139.02c	Mitochondrial oxaloacetate transport protein	0	3	1	0	3	1	0.333333	-1	0	-1
19114103	SPAC23C4.19	Transcription elongation factor spt5	14	0	0	14	0	0.0714286	1	-1	0	-1
19114150	SPAC22A12.08c	Uncharacterized CDP-alcohol phosphatidyltransferase class-I family protein C22A12.08c	0	3	0	0	3	1	0.333333	-1	0	-1
19114154	SPAC22A12.12c	Exosome complex component rrp40	3	0	0	3	0	0.333333	1	-1	0	-1
19114171	SPAC10F6.08c	HMG box-containing protein C10F6.08c	4	0	0	4	0	0.25	1	-1	0	-1
19114172	SPAC10F6.09c	Structural maintenance of chromosomes protein 3	4	0	0	4	0	0.25	1	-1	0	-1
19114242	SPAC3A12.04c	Probable ribonuclease P protein subunit 3	2	0	0	2	0	0.5	1	-1	0	-1
19114249	SPAC3A12.11c	Pre-mRNA-splicing factor cwc2	3	0	0	3	0	0.333333	1	-1	0	-1
19114306	SPAC23H4.12	Chromatin modification-related protein eaf3	5	0	0	5	0	0.2	1	-1	0	-1
19114343	SPAC343.11c	Multicopy suppressor of chk1 protein 1	3	0	0	3	0	0.333333	1	-1	0	-1
19114361	SPAC664.01c	Chromatin-associated protein swi6	2	0	0	2	0	0.5	1	-1	0	-1
19114420	SPAC1002.19	Uracil-regulated protein 1	0	6	1	0	6	1	0.166667	-1	0	-1
19114486	SPAC17H9.04c	Uncharacterized RNA-binding protein C17H9.04c	0	2	0	0	2	1	0.5	-1	0	-1
19114494	SPAC17H9.12c	Uncharacterized FAD-binding protein C17H9.12c	0	2	0	0	2	1	0.5	-1	0	-1
19114504	SPAC607.03c	13 kDa ribonucleoprotein-associated protein	0	2	0	0	2	1	0.5	-1	0	-1
19114526	SPAC3C7.13c	Probable glucose-6-phosphate 1-dehydrogenase C7.13c	0	3	0	0	3	1	0.333333	-1	0	-1
19114554	SPAC23C11.11	Casein kinase II subunit alpha	0	7	1	0	7	1	0.142857	-1	0	-1
19114558	SPAC23C11.15	Paired amphipathic helix protein pst2	4	0	0	4	0	0.25	1	-1	0	-1
19114565	SPAC13F5.05	Thioredoxin domain-containing protein C13F5.05, mitochondrial	2	0	0	2	0	0.5	1	-1	0	-1
19114580	SPAC18G6.04c	Probable serine hydroxymethyltransferase, cytosolic	2	0	0	2	0	0.5	1	-1	0	-1
19114582	SPAC18G6.06	Probable U3 small nucleolar RNA-associated protein 11	0	4	0	0	4	1	0.25	-1	0	-1
19114602	SPAC4G9.08c	DNA-directed RNA polymerase III subunit RPC2	5	0	0	5	0	0.2	1	-1	0	-1
19114605	SPAC4G9.11c	Mismatch-binding protein cmb1	6	2	2	3	1	0.333333	1	-1	0	-1
19114617	SPAC13G7.03	Uncharacterized protein C13G7.03	2	0	0	2	0	0.5	1	-1	0	-1
19114632	SPAC6C3.06c	Putative phospholipid-transporting ATPase C6C3.06c	2	0	0	2	0	0.5	1	-1	0	-1
19114672	SPAC6B12.05c	Uncharacterized protein C6B12.05c	2	0	0	2	0	0.5	1	-1	0	-1
19114712	SPAC23H3.10	SWI/SNF and RSC complexes subunit ssr2	3	0	0	3	0	0.333333	1	-1	0	-1
19114737	SPAC4A8.13c	Proteasome subunit beta type-5	0	2	1	0	2	1	0.5	-1	0	-1
19114753	SPAC823.14	Uncharacterized phosphatase C823.14	3	0	0	3	0	0.333333	1	-1	0	-1
19114792	SPAC644.12	Pre-mRNA-splicing factor cef1	3	0	0	3	0	0.333333	1	-1	0	-1
19114875	SPACUNK4.15	Uncharacterized protein UNK4,15	0	2	1	0	2	1	0.5	-1	0	-1
19114906	SPAPB24D3.08c	Zinc-type alcohol dehydrogenase-like protein PB24D3.08c	0	4	1	0	4	1	0.25	-1	0	-1
19114916	SPAC31G5.04	Probable homoisocitrate dehydrogenase	2	0	0	2	0	0.5	1	-1	0	-1
19114932	SPAC31G5.19	Uncharacterized AAA domain-containing protein C31G5.19	4	0	0	4	0	0.25	1	-1	0	-1
19114982	SPAC688.12c	Uncharacterized protein C688.12c	0	2	0	0	2	1	0.5	-1	0	-1
19115024	SPAC6G9.03c	Meiotically up-regulated gene 183 protein	3	0	0	3	0	0.333333	1	-1	0	-1
19115027	SPAC6G9.06c	Spindle pole body protein pcp1	4	0	0	4	0	0.25	1	-1	0	-1
19115041	SPAPB1E7.03	DNA-directed RNA polymerase III subunit rpc3	5	0	0	5	0	0.2	1	-1	0	-1
19115053	SPAC2E1P5.03	Uncharacterized J domain-containing protein C2E1P5.03	0	6	1	0	6	1	0.166667	-1	0	-1
19115094	SPAC3H5.10	60S ribosomal protein L32-A	3	0	0	3	0	0.333333	1	-1	0	-1
19115191	SPAC8C9.08	40S ribosomal protein S5-A	8	0	0	8	0	0.125	1	-1	0	-1
19115193	SPAC8C9.10c	Ribosomal RNA-processing protein 14-N	2	0	0	2	0	0.5	1	-1	0	-1
19115221	SPAC15E1.08	N-terminal acetyltransferase A complex catalytic subunit ard1	5	0	0	5	0	0.2	1	-1	0	-1
19115268	SPAC1071.06	SWI/SNF and RSC complexes subunit arp9	8	0	0	8	0	0.125	1	-1	0	-1
19115269	SPAC1071.07c	40S ribosomal protein S15-B	4	0	0	4	0	0.25	1	-1	0	-1
19115271	SPAC1071.09c	Uncharacterized J domain-containing protein C1071.09c	0	2	0	0	2	1	0.5	-1	0	-1
19115281	SPAC926.08c	Brix domain-containing protein 1 homolog	14	5	4	3.5	1.25	0.285714	0.8	-1	0	-1
19115326	SPAPJ698.03c	Pre-mRNA-splicing factor rse1	3	0	0	3	0	0.333333	1	-1	0	-1
19115332	SPAC19G12.05	Uncharacterized mitochondrial carrier C19G12.05	0	2	1	0	2	1	0.5	-1	0	-1
19115368	SPAC26H5.09c	Uncharacterized oxidoreductase C26H5.09c	0	2	0	0	2	1	0.5	-1	0	-1
19115369	SPAC26H5.10c	Eukaryotic translation initiation factor 5A-1	3	0	0	3	0	0.333333	1	-1	0	-1
19115418	SPAC2C4.03c	Probable small nuclear ribonucleoprotein Sm D2	4	3	2	2	1.5	0.5	0.666667	-1	0	-1
19115440	SPAC25G10.08	Eukaryotic translation initiation factor 3 subunit B	29	23	13	2.23077	1.76923	0.448276	0.565217	-1	0	-1
19115450	SPAC27F1.09c	U2 snRNP component prp10	9	0	0	9	0	0.111111	1	-1	0	-1
19115451	SPAC23D3.01	PWWP domain-containing protein C23D3.01	2	0	0	2	0	0.5	1	-1	0	-1
19115452	SPAC23D3.02	Replication factor C subunit 2	0	3	0	0	3	1	0.333333	-1	0	-1
19115478	SPAC29E6.08	TATA-box-binding protein	3	0	0	3	0	0.333333	1	-1	0	-1
19115480	SPAC29E6.10c	Stress response protein nst1	2	0	0	2	0	0.5	1	-1	0	-1
19115525	SPAC27D7.07c	Probable small nuclear ribonucleoprotein Sm D1	4	0	0	4	0	0.25	1	-1	0	-1
19115537	SPAC637.07	Eukaryotic translation initiation factor 3 subunit D	14	0	0	14	0	0.0714286	1	-1	0	-1
19115564	SPAC1093.05	ATP-dependent RNA helicase dbp4	10	0	0	10	0	0.1	1	-1	0	-1
19115628	SPAC1782.09c	SPAC1782.09c	4	0	0	4	0	0.25	1	-1	0	-1
19115645	SPAC22F8.10c	Spliceosome-associated protein 145	2	0	0	2	0	0.5	1	-1	0	-1
19115665	SPAC4F10.10c	Mannan polymerase complex subunit mnn9	0	2	0	0	2	1	0.5	-1	0	-1
19115695	SPAPB8E5.09	RuvB-like helicase 1	11	5	4	2.75	1.25	0.363636	0.8	-1	0	-1
19115705	SPAC1B3.09c	Uncharacterized NOC2 family protein C1B3.09c	5	0	0	5	0	0.2	1	-1	0	-1
19115710	SPAC1B3.13	U3 small nucleolar RNA-associated protein 17	17	0	0	17	0	0.0588235	1	-1	0	-1
19115751	SPAC22E12.13c	Ribosome biogenesis protein rlp24	2	4	2	1	2	1	0.5	-1	0	-1
19115814	SPAC19D5.04	E3 ubiquitin-protein ligase ptr1	2	0	0	2	0	0.5	1	-1	0	-1
19115867	SPAC4D7.02c	Uncharacterized protein C4D7.02c	0	2	1	0	2	1	0.5	-1	0	-1
19115929	SPAC869.02c	Flavohemoprotein	0	7	0	0	7	1	0.142857	-1	0	-1
63054438	SPCC132.01c	Uncharacterized protein C132.01c	4	0	0	4	0	0.25	1	-1	0	-1
63054442	SPCC11E10.01	Cystathionine beta-lyase	0	2	1	0	2	1	0.5	-1	0	-1
63054449	SPCC1450.02	Bromodomain-containing protein C1450.02	4	0	0	4	0	0.25	1	-1	0	-1
63054499	SPAC22H12.01c	Meiotically up-regulated gene 35 protein	0	3	0	0	3	1	0.333333	-1	0	-1
63054500	SPAPYUL23.01	DNA-directed RNA polymerases I and III subunit RPAC2	2	0	0	2	0	0.5	1	-1	0	-1
63054805	SPBC1347.05c	DnaJ-related protein spj1	8	0	0	8	0	0.125	1	-1	0	-1
67989518	SPAC12G12.13c	Poly(A) RNA polymerase cid14	2	0	0	2	0	0.5	1	-1	0	-1
67993609	SPAPB17E12.11	Uncharacterized protein PB17E12.11	4	2	2	2	1	0.5	1	-1	0	-1
162312108	SPCP25A2.01c	Putative 3-mercaptopyruvate sulfurtransferase	0	5	1	0	5	1	0.2	-1	0	-1
162312141	SPBPB8B6.07c	Enolase 1-2	0	2	1	0	2	1	0.5	-1	0	-1
162312227	SPBC18E5.13	Probable translation initiation factor, mitochondrial	3	0	0	3	0	0.333333	1	-1	0	-1
162312243	SPBC17F3.01c	Rho-GTPase-activating protein 5	0	2	0	0	2	1	0.5	-1	0	-1
162312378	SPAC2G11.15c	Trimethylguanosine synthase	3	0	0	3	0	0.333333	1	-1	0	-1
162312390	SPAC1A6.02	Uncharacterized WD repeat-containing protein C1A6.02	2	0	0	2	0	0.5	1	-1	0	-1
162312416	SPAC1610.02c	60S ribosomal protein L1, mitochondrial	2	0	0	2	0	0.5	1	-1	0	-1
162312460	SPAPYUK71.02	DNA-directed RNA polymerase II subunit rpb7	3	0	0	3	0	0.333333	1	-1	0	-1
162312464	SPAPB2C8.02	Uncharacterized transcriptional regulatory protein PB24D3.01	4	0	0	4	0	0.25	1	-1	0	-1
162312520	SPAPJ698.01c	Replication factor C subunit 3	0	2	0	0	2	1	0.5	-1	0	-1
162312570	SPAC11E3.01c	Helicase swr1	2	0	0	2	0	0.5	1	-1	0	-1
295442834	SPBC11B10.10c		3	0	0	3	0	0.333333	1	-1	0	-1
295443014	SPAPB1E7.14		2	0	0	2	0	0.5	1	-1	0	-1
295443022	SPAC1142.01		0	2	0	0	2	1	0.5	-1	0	-1
295443048	SPAC2C4.11c		0	2	1	0	2	1	0.5	-1	0	-1
295443051	SPAC23D3.08		2	0	0	2	0	0.5	1	-1	0	-1
347834168	SPAC17G6.15c		0	2	1	0	2	1	0.5	-1	0	-1
347834212	SPAC1B3.13		0	11	0	0	11	1	0.0909091	-1	0	-1
347834351	SPBC2A9.08c		0	3	1	0	3	1	0.333333	-1	0	-1
347834364	SPBC776.17		0	6	0	0	6	1	0.166667	-1	0	-1
347834384	SPBP8B7.10c		0	3	0	0	3	1	0.333333	-1	0	-1
347834397	SPBC1347.05c		0	8	0	0	8	1	0.125	-1	0	-1
173408	SPAC664.11		14	18	26	0.538462	0.692308	1.85714	1.44444	0	0	0
1313916	SPAC25G10.06		3	2	3	1	0.666667	1	1.5	0	0	0
1359468	SPBC1709.05		21	24	26	0.807692	0.923077	1.2381	1.08333	0	0	0
1749534	SPAC16.02c		7	6	6	1.16667	1	0.857143	1	0	0	0
1749582	SPAC4D7.05		16	18	10	1.6	1.8	0.625	0.555556	0	0	0
1841308	SPBC21C3.13		4	5	7	0.571429	0.714286	1.75	1.4	0	0	0
1902882	SPCC622.18		8	7	7	1.14286	1	0.875	1	0	0	0
12000355	SPBC660.11		10	7	7	1.42857	1	0.7	1	0	0	0
19075214	SPCC330.14c	60S ribosomal protein L24-B	3	4	5	0.6	0.8	1.66667	1.25	0	0	0
19075257	SPCC794.09c	Elongation factor 1-alpha-A	16	19	19	0.842105	1	1.1875	1	0	0	0
19075350	SPCC970.05	60S ribosomal protein L36-A	5	3	5	1	0.6	1	1.66667	0	0	0
19075363	SPCP31B10.07	Elongation factor 2	19	29	37	0.513514	0.783784	1.94737	1.27586	0	0	0
19075364	SPCP31B10.08c	60S ribosomal protein L33-B	4	4	4	1	1	1	1	0	0	0
19075391	SPCC1183.08c	60S ribosomal protein L1-B	8	8	10	0.8	0.8	1.25	1.25	0	0	0
19075407	SPCC5E4.07	60S ribosomal protein L28-A	5	4	6	0.833333	0.666667	1.2	1.5	0	0	0
19075529	SPCPB16A4.05c	Uncharacterized urease accessory protein ureG-like	0	5	2	0	2.5	2	0.4	-1	1	0
19075533	SPCC1795.11	ATP-dependent RNA helicase ded1	25	29	24	1.04167	1.20833	0.96	0.827586	0	0	0
19075617	SPCC645.08c	Staphylococcal nuclease domain-containing protein 1	8	10	13	0.615385	0.769231	1.625	1.3	0	0	0
19075785	SPCC417.08	Elongation factor 3	26	33	37	0.702703	0.891892	1.42308	1.12121	0	0	0
19075845	SPCC285.17	Upstream activation factor subunit spp27	0	4	2	0	2	2	0.5	-1	1	0
19075852	SPCC1223.07c	Aspartyl-tRNA synthetase, cytoplasmic	11	12	9	1.22222	1.33333	0.818182	0.75	0	0	0
19075853	SPCC1223.08c	Dihydrofolate reductase	9	10	13	0.692308	0.769231	1.44444	1.3	0	0	0
19075854	SPCC1223.09	Probable uricase	0	6	2	0	3	2	0.333333	-1	1	0
19075878	SPCC74.05	60S ribosomal protein L27-B	4	5	5	0.8	1	1.25	1	0	0	0
19075921	SPCC1739.13	Probable heat shock protein ssa2	28	32	37	0.756757	0.864865	1.32143	1.15625	0	0	0
19075935	SPCC576.08c	40S ribosomal protein S2	6	8	8	0.75	1	1.33333	1	0	0	0
19075938	SPCC576.11	60S ribosomal protein L15-A	8	6	7	1.14286	0.857143	0.875	1.16667	0	0	0
19111878	SPBC660.07	Neutral trehalase	0	4	2	0	2	2	0.5	-1	1	0
19111959	SPBC106.18	60S ribosomal protein L25-A	6	3	5	1.2	0.6	0.833333	1.66667	0	0	0
19112036	SPBC839.04	60S ribosomal protein L2	7	5	6	1.16667	0.833333	0.857143	1.2	0	0	0
19112157	SPBC646.07c	Putative enoyl reductase C646.07c	7	4	4	1.75	1	0.571429	1	0	0	0
19112194	SPBC146.13c	Myosin-1	8	11	13	0.615385	0.846154	1.625	1.18182	0	0	0
19112220	SPBC1734.11	Mitochondrial protein import protein mas5	11	8	7	1.57143	1.14286	0.636364	0.875	0	0	0
19112305	SPBC3D6.02	Uba3-binding protein but2	4	3	4	1	0.75	1	1.33333	0	0	0
19112378	SPBC17A3.04c	Probable methionyl-tRNA synthetase, cytoplasmic	7	13	8	0.875	1.625	1.14286	0.615385	0	0	0
19112397	SPBP22H7.08	40S ribosomal protein S10-B	3	3	5	0.6	0.6	1.66667	1.66667	0	0	0
19112410	SPBC32H8.12c	Actin	10	15	14	0.714286	1.07143	1.4	0.933333	0	0	0
19112446	SPBC29B5.03c	60S ribosomal protein L26	6	7	8	0.75	0.875	1.33333	1.14286	0	0	0
19112507	SPBC1D7.04	mRNA export protein mlo3	7	9	5	1.4	1.8	0.714286	0.555556	0	0	0
19112513	SPBC11G11.03	mRNA turnover protein 4 homolog	6	4	5	1.2	0.8	0.833333	1.25	0	0	0
19112528	SPBC18H10.12c	60S ribosomal protein L7-C	13	8	12	1.08333	0.666667	0.923077	1.5	0	0	0
19112529	SPBC18H10.13	40S ribosomal protein S14	7	7	6	1.16667	1.16667	0.857143	0.857143	0	0	0
19112530	SPBC18H10.14	40S ribosomal protein S16	7	8	9	0.777778	0.888889	1.28571	1.125	0	0	0
19112602	SPBC1A4.08c	T-complex protein 1 subunit gamma	6	8	8	0.75	1	1.33333	1	0	0	0
19112624	SPBC29A3.04	60S ribosomal protein L8	10	14	17	0.588235	0.823529	1.7	1.21429	0	0	0
19112691	SPBC17G9.10	60S ribosomal protein L11	7	5	7	1	0.714286	1	1.4	0	0	0
19112698	SPBC14C8.03	Methionine aminopeptidase 2	2	5	3	0.666667	1.66667	1.5	0.6	0	0	0
19112731	SPBC16H5.08c	Uncharacterized ABC transporter ATP-binding protein C16H5.08c	11	7	13	0.846154	0.538462	1.18182	1.85714	0	0	0
19112738	SPBC16H5.02	6-phosphofructokinase	17	17	28	0.607143	0.607143	1.64706	1.64706	0	0	0
19112824	SPBC365.03c		3	2	3	1	0.666667	1	1.5	0	0	0
19112932	SPBC685.06		3	6	5	0.6	1.2	1.66667	0.833333	0	0	0
19112933	SPBC685.07c	60S ribosomal protein L27-A	7	7	7	1	1	1	1	0	0	0
19112946	SPBC32F12.11		14	18	19	0.736842	0.947368	1.35714	1.05556	0	0	0
19112977	SPBP4H10.11c	Long-chain-fatty-acid--CoA ligase 2	0	5	2	0	2.5	2	0.4	-1	1	0
19112994	SPBC1703.07	Probable ATP-citrate synthase subunit 1	7	8	12	0.583333	0.666667	1.71429	1.5	0	0	0
19113090	SPBC4C3.07	Eukaryotic translation initiation factor 3 subunit F	4	7	5	0.8	1.4	1.25	0.714286	0	0	0
19113109	SPBC776.02c	Serine/threonine-protein phosphatase PP1-1	0	6	2	0	3	2	0.333333	-1	1	0
19113203	SPBC3B8.03	Saccharopine dehydrogenase [NADP+, L-glutamate-forming]	3	7	5	0.6	1.4	1.66667	0.714286	0	0	0
19113298	SPBC16D10.11c	40S ribosomal protein S18	8	8	9	0.888889	0.888889	1.125	1.125	0	0	0
19113310	SPBP8B7.11	Putative G3BP-like protein	2	2	2	1	1	1	1	0	0	0
19113315	SPBP8B7.16c	ATP-dependent RNA helicase dbp2	20	17	12	1.66667	1.41667	0.6	0.705882	0	0	0
19113424	SPBC1604.08c	Importin subunit alpha-2	5	1	2	2.5	0.5	0.4	2	-1	1	0
19113442	SPBC26H8.07c	Tubulin beta chain	4	8	7	0.571429	1.14286	1.75	0.875	0	0	0
19113524	SPBC14F5.06	Uncharacterized ABC transporter ATP-binding protein C14F5.06	6	6	7	0.857143	0.857143	1.16667	1.16667	0	0	0
19113555	SPBC16G5.14c	40S ribosomal protein S3	6	11	11	0.545455	1	1.83333	1	0	0	0
19113619	SPBC1289.03c	GTP-binding nuclear protein spi1	4	4	3	1.33333	1.33333	0.75	0.75	0	0	0
19113745	SPAC13G6.07c	40S ribosomal protein S6-A	10	8	10	1	0.8	1	1.25	0	0	0
19113884	SPAC227.18	Saccharopine dehydrogenase [NAD+, L-lysine-forming]	6	6	9	0.666667	0.666667	1.5	1.5	0	0	0
19114012	SPAC521.05	40S ribosomal protein S8-B	4	8	7	0.571429	1.14286	1.75	0.875	0	0	0
19114028	SPAC22H12.04c	SPAC22H12.04c	9	6	6	1.5	1	0.666667	1	0	0	0
19114108	SPAC1A6.04c	Lysophospholipase 1	4	4	4	1	1	1	1	0	0	0
19114146	SPAC22A12.04c	40S ribosomal protein S22	6	5	6	1	0.833333	1	1.2	0	0	0
19114157	SPAC22A12.15c	78 kDa glucose-regulated protein homolog	19	22	23	0.826087	0.956522	1.21053	1.04545	0	0	0
19114176	SPAC10F6.13c	Aspartate aminotransferase, cytoplasmic	0	4	2	0	2	2	0.5	-1	1	0
19114205	SPAC6F12.07	Mitochondrial import receptor subunit tom20	3	2	2	1.5	1	0.666667	1	0	0	0
19114227	SPAC57A10.10c	La protein homolog	12	7	7	1.71429	1	0.583333	1	0	0	0
19114248	SPAC3A12.10	60S ribosomal protein L20	6	8	10	0.6	0.8	1.66667	1.25	0	0	0
19114281	SPAC57A7.12	Heat shock protein 70 homolog C57A7.12	13	13	18	0.722222	0.722222	1.38462	1.38462	0	0	0
19114289	SPAC57A7.04c	Polyadenylate-binding protein, cytoplasmic and nuclear	14	15	18	0.777778	0.833333	1.28571	1.2	0	0	0
19114383	SPAC17A5.03	60S ribosomal protein L3-A	11	19	16	0.6875	1.1875	1.45455	0.842105	0	0	0
19114395	SPAC17A5.15c	Probable glutamyl-tRNA synthetase, cytoplasmic	13	18	14	0.928571	1.28571	1.07692	0.777778	0	0	0
19114470	SPAC9G1.03c		3	4	3	1	1.33333	1	0.75	0	0	0
19114521	SPAC3C7.08c	mRNA export factor elf1	14	13	12	1.16667	1.08333	0.857143	0.923077	0	0	0
19114589	SPAC18G6.14c	40S ribosomal protein S7	6	7	6	1	1.16667	1	0.857143	0	0	0
19114610	SPAC4G9.16c	60S ribosomal protein L9-A	6	6	8	0.75	0.75	1.33333	1.33333	0	0	0
19114679	SPAC6B12.12	Probable mitochondrial import receptor subunit tom70	10	16	10	1	1.6	1	0.625	0	0	0
19114812	SPAC6F6.07c	40S ribosomal protein S13	8	6	8	1	0.75	1	1.33333	0	0	0
19114834	SPAC1805.11c	40S ribosomal protein S26-B	2	2	3	0.666667	0.666667	1.5	1.5	0	0	0
19114836	SPAC1805.13	60S ribosomal protein L14	4	3	5	0.8	0.6	1.25	1.66667	0	0	0
19114860	SPAC3F10.16c	Large subunit GTPase 1	2	2	2	1	1	1	1	0	0	0
19114915	SPAC31G5.03	40S ribosomal protein S11	5	5	5	1	1	1	1	0	0	0
19114930	SPAC31G5.17c	40S ribosomal protein S10-A	6	4	4	1.5	1	0.666667	1	0	0	0
19114949	SPAC24C9.12c	Probable serine hydroxymethyltransferase, cytosolic	13	15	14	0.928571	1.07143	1.07692	0.933333	0	0	0
19115097	SPAC3H5.07		16	12	18	0.888889	0.666667	1.125	1.5	0	0	0
19115165	SPAC17G6.06	40S ribosomal protein S24-A	4	3	3	1.33333	1	0.75	1	0	0	0
19115272	SPAC1071.10c	Plasma membrane ATPase 1	24	25	28	0.857143	0.892857	1.16667	1.12	0	0	0
19115568	SPAC30C2.04	Uncharacterized tRNA-binding protein C30C2.04	11	11	6	1.83333	1.83333	0.545455	0.545455	0	0	0
19115592	SPAC1834.01	Eukaryotic peptide chain release factor subunit 1	3	6	5	0.6	1.2	1.66667	0.833333	0	0	0
19115602	SPAC1834.11c	Vesicular-fusion protein sec18	0	4	2	0	2	2	0.5	-1	1	0
19115608	SPAC458.02c	Uncharacterized protein C458.02c	7	5	8	0.875	0.625	1.14286	1.6	0	0	0
19115677	SPAC19B12.02c	1,3-beta-glucanosyltransferase gas1	2	2	2	1	1	1	1	0	0	0
19115738	SPAC890.08	60S ribosomal protein L31	4	5	7	0.571429	0.714286	1.75	1.4	0	0	0
19115769	SPAC1250.05		4	2	3	1.33333	0.666667	0.75	1.5	0	0	0
19115852	SPAP8A3.01	60S ribosomal protein L22	6	6	5	1.2	1.2	0.833333	0.833333	0	0	0
67993614	SPAPB17E12.13	60S ribosomal protein L18-B	3	4	5	0.6	0.8	1.66667	1.25	0	0	0
162312281	SPBC1778.01c	Uncharacterized J domain-containing protein C1778.01c	8	7	12	0.666667	0.583333	1.5	1.71429	0	0	0
162312556	SPAC11H11.06	Actin-related protein 2	0	8	4	0	2	4	0.5	-1	1	0
295442865	SPBP4H10.15		5	6	8	0.625	0.75	1.6	1.33333	0	0	0
173519	SPBC16A3.15c		0	3	3	0	1	3	1	0	1	1
1200144	SPAC4H3.10c		13	18	27	0.481481	0.666667	2.07692	1.5	0	1	1
1235752	SPAP8A3.09c		3	1	3	1	0.333333	1	3	0	1	1
1695643	SPBC17G9.11c		3	18	34	0.0882353	0.529412	11.3333	1.88889	0	1	1
1749516	SPBC21C3.08c		0	6	9	0	0.666667	9	1.5	0	1	1
1749530	SPBC660.16		3	19	20	0.15	0.95	6.66667	1.05263	0	1	1
1749576	SPBC215.09c		0	8	11	0	0.727273	11	1.375	0	1	1
1749578	SPACUNK4.10		0	3	2	0	1.5	2	0.666667	0	1	1
1749752	SPBC337.05c		0	5	5	0	1	5	1	0	1	1
1783177	SPAC694.05c		0	2	3	0	0.666667	3	1.5	0	1	1
1813335	SPAC1556.07		2	10	11	0.181818	0.909091	5.5	1.1	0	1	1
6685653	SPAC637.07		0	13	7	0	1.85714	7	0.538462	0	1	1
13752360	SPAC6B12.15		2	11	13	0.153846	0.846154	6.5	1.18182	0	1	1
19075184	SPCC757.09c	RNA-binding protein rnc1	0	2	2	0	1	2	1	0	1	1
19075187	SPCC757.12	Alpha-amylase 1	0	4	4	0	1	4	1	0	1	1
19075193	SPCC613.05c	60S ribosomal protein L35	4	1	4	1	0.25	1	4	0	1	1
19075255	SPCC794.07	Dihydrolipoyllysine-residue acetyltransferase component of pyruvate dehydrogenase complex, mitochondrial	2	6	10	0.2	0.6	5	1.66667	0	1	1
19075260	SPCC794.12c	NAD-dependent malic enzyme	0	12	16	0	0.75	16	1.33333	0	1	1
19075286	SPCC736.15	Probable sphingolipid long chain base-responsive protein C736.15	3	4	6	0.5	0.666667	2	1.5	0	1	1
19075316	SPCC306.08c	Malate dehydrogenase, mitochondrial	0	11	16	0	0.6875	16	1.45455	0	1	1
19075317	SPCC306.09c	Adenylyl cyclase-associated protein	0	4	7	0	0.571429	7	1.75	0	1	1
19075337	SPCC364.07	Putative D-3-phosphoglycerate dehydrogenase	0	6	10	0	0.6	10	1.66667	0	1	1
19075341	SPCC364.03		3	7	9	0.333333	0.777778	3	1.28571	0	1	1
19075352	SPCC970.03	NADH-cytochrome b5 reductase 1	0	4	4	0	1	4	1	0	1	1
19075376	SPCC1672.05c	Tyrosyl-tRNA synthetase, cytoplasmic	4	2	6	0.666667	0.333333	1.5	3	0	1	1
19075385	SPCC1183.02	Putative glutathione S-transferase C1183.02	0	4	6	0	0.666667	6	1.5	0	1	1
19075397	SPCC31H12.04c	60S ribosomal protein L12	5	3	6	0.833333	0.5	1.2	2	0	1	1
19075400	SPCC31H12.07	Protein transport protein sec23-1	0	4	7	0	0.571429	7	1.75	0	1	1
19075420	SPCC16C4.10	Probable 6-phosphogluconolactonase	0	2	3	0	0.666667	3	1.5	0	1	1
19075430	SPCPJ732.02c	Xylulose kinase	0	3	3	0	1	3	1	0	1	1
19075453	SPCC1020.06c	Transaldolase	0	12	18	0	0.666667	18	1.5	0	1	1
19075461	SPCC1393.03	40S ribosomal protein S15-A	0	4	4	0	1	4	1	0	1	1
19075524	SPCC24B10.21	Triosephosphate isomerase	0	12	19	0	0.631579	19	1.58333	0	1	1
19075540	SPCC1795.04c	Probable proteasome subunit alpha type-3	0	3	4	0	0.75	4	1.33333	0	1	1
19075606	SPCC550.14	KH domain-containing protein C550.14	14	24	33	0.424242	0.727273	2.35714	1.375	0	1	1
19075632	SPCC1322.04	Probable UTP--glucose-1-phosphate uridylyltransferase	5	16	14	0.357143	1.14286	2.8	0.875	0	1	1
19075639	SPCC1322.11	60S ribosomal protein L23	2	1	3	0.666667	0.333333	1.5	3	0	1	1
19075641	SPCC1322.13	Phosphoribosylaminoimidazole carboxylase	0	3	3	0	1	3	1	0	1	1
19075644	SPCC1322.16	Prohibitin-2	0	2	2	0	1	2	1	0	1	1
19075653	SPCC338.15	Dolichyl-diphosphooligosaccharide--protein glycosyltransferase 48 kDa subunit	0	4	4	0	1	4	1	0	1	1
19075680	SPCC622.08c	Histone H2A-alpha	0	3	2	0	1.5	2	0.666667	0	1	1
19075709	SPCC188.06c	Signal recognition particle 54 kDa protein homolog	2	1	2	1	0.5	1	2	0	1	1
19075744	SPCC13B11.01	Alcohol dehydrogenase	7	12	15	0.466667	0.8	2.14286	1.25	0	1	1
19075803	SPCC1450.04	Elongation factor 1-beta	0	7	8	0	0.875	8	1.14286	0	1	1
19075823	SPCC1442.09	Probable anthranilate synthase component 1	0	3	2	0	1.5	2	0.666667	0	1	1
19075893	SPCC18.14c	60S acidic ribosomal protein P0	3	6	8	0.375	0.75	2.66667	1.33333	0	1	1
19075905	SPCC1906.01	Mannose-1-phosphate guanyltransferase	0	8	8	0	1	8	1	0	1	1
19075930	SPCC576.03c	Peroxiredoxin tpx1	0	6	9	0	0.666667	9	1.5	0	1	1
19075937	SPCC576.10c	26S protease regulatory subunit 6B homolog	0	4	3	0	1.33333	3	0.75	0	1	1
19075946	SPCC126.03		2	0	2	1	0	1	2	0	1	1
19075949	SPCC126.06	Twinfilin	0	3	3	0	1	3	1	0	1	1
19075951	SPCC126.08c	L-type lectin-like domain-containing protein C126.08c	0	2	2	0	1	2	1	0	1	1
19075964	SPCC1620.06c	Ribose-phosphate pyrophosphokinase 3	0	5	3	0	1.66667	3	0.6	0	1	1
19076001	SPCC1840.02c	1,3-beta-glucan synthase component bgs4	2	10	17	0.117647	0.588235	8.5	1.7	0	1	1
19076037	SPCC70.03c	Probable proline dehydrogenase, mitochondrial	0	5	4	0	1.25	4	0.8	0	1	1
19076062	SPCP1E11.09c	60S acidic ribosomal protein P1-alpha 5	3	0	3	1	0	1	3	0	1	1
19111869	SPBC1198.08	SPBC1198.08	0	6	10	0	0.6	10	1.66667	0	1	1
19111897	SPBC800.04c	60S ribosomal protein L43-A	0	2	3	0	0.666667	3	1.5	0	1	1
19111917	SPBC1773.10c	Probable asparaginyl-tRNA synthetase, cytoplasmic	7	9	14	0.5	0.642857	2	1.55556	0	1	1
19111944	SPBC106.03	UPF0744 protein C106.03	0	3	2	0	1.5	2	0.666667	0	1	1
19111995	SPBC902.05c	Isocitrate dehydrogenase [NAD] subunit 2, mitochondrial	0	5	9	0	0.555556	9	1.8	0	1	1
19112006	SPBC1685.10	40S ribosomal protein S27	0	2	3	0	0.666667	3	1.5	0	1	1
19112028	SPBC354.12	Glyceraldehyde-3-phosphate dehydrogenase 2	0	9	8	0	1.125	8	0.888889	0	1	1
19112037	SPBC839.05c	40S ribosomal protein S17-A	8	5	12	0.666667	0.416667	1.5	2.4	0	1	1
19112045	SPBC839.13c	60S ribosomal protein L16-B	0	3	5	0	0.6	5	1.66667	0	1	1
19112071	SPBPJ4664.04	Putative coatomer subunit alpha	8	4	9	0.888889	0.444444	1.125	2.25	0	1	1
19112076	SPBC119.03	Probable catechol O-methyltransferase 1	0	5	5	0	1	5	1	0	1	1
19112115	SPBC530.10c	ADP,ATP carrier protein	0	10	8	0	1.25	8	0.8	0	1	1
19112124	SPBC36.04	Cysteine synthase 1	0	2	2	0	1	2	1	0	1	1
19112134	SPBC713.03	Putative D-lactate dehydrogenase C713.03, mitochondrial	0	4	3	0	1.33333	3	0.75	0	1	1
19112161	SPBC646.11	T-complex protein 1 subunit zeta	2	1	2	1	0.5	1	2	0	1	1
19112163	SPBC646.13	Protein sds23/moc1	0	2	3	0	0.666667	3	1.5	0	1	1
19112222	SPBC1734.13	ATP synthase subunit gamma, mitochondrial	0	2	3	0	0.666667	3	1.5	0	1	1
19112272	SPBC4.07c		0	4	4	0	1	4	1	0	1	1
19112372	SPBC8D2.18c	Adenosylhomocysteinase	3	13	13	0.230769	1	4.33333	1	0	1	1
19112456	SPBC28F2.03	Peptidyl-prolyl cis-trans isomerase	3	8	10	0.3	0.8	3.33333	1.25	0	1	1
19112469	SPBC21B10.10	40S ribosomal protein S4-B	0	10	11	0	0.909091	11	1.1	0	1	1
19112484	SPBC19C2.07	Fructose-bisphosphate aldolase	8	15	23	0.347826	0.652174	2.875	1.53333	0	1	1
19112494	SPBC2F12.14c	Inosine-5'-monophosphate dehydrogenase	3	8	15	0.2	0.533333	5	1.875	0	1	1
19112518	SPBC18H10.02	Long-chain-fatty-acid--CoA ligase 1	0	4	7	0	0.571429	7	1.75	0	1	1
19112586	SPBC16E9.12c	Polyadenylate-binding protein 2	0	2	2	0	1	2	1	0	1	1
19112632	SPBC29A3.12	40S ribosomal protein S9-B	0	11	11	0	1	11	1	0	1	1
19112644	SPBC18E5.06	40S ribosomal protein S21	3	1	3	1	0.333333	1	3	0	1	1
19112673	SPBC1711.08	Uncharacterized protein C1711.08	0	3	5	0	0.6	5	1.66667	0	1	1
19112678	SPBC1711.13	Histidinol dehydrogenase	0	6	4	0	1.5	4	0.666667	0	1	1
19112684	SPBC17G9.03c	Lysyl-tRNA synthetase, cytoplasmic	7	9	14	0.5	0.642857	2	1.55556	0	1	1
19112688	SPBC17G9.07	40S ribosomal protein S24-B	0	2	3	0	0.666667	3	1.5	0	1	1
19112695	SPBC1815.01	Enolase 1-1	6	18	24	0.25	0.75	4	1.33333	0	1	1
19112741	SPBC12D12.03	T-complex protein 1 subunit alpha	0	3	3	0	1	3	1	0	1	1
19112750	SPBC24C6.04	Probable delta-1-pyrroline-5-carboxylate dehydrogenase	0	12	19	0	0.631579	19	1.58333	0	1	1
19112751	SPBC24C6.05	Probable coatomer subunit epsilon	0	3	3	0	1	3	1	0	1	1
19112761	SPBC19G7.03c	40S ribosomal protein S30	2	1	3	0.666667	0.333333	1.5	3	0	1	1
19112802	SPBC12C2.12c	Lactoylglutathione lyase	0	2	3	0	0.666667	3	1.5	0	1	1
19112835	SPBC365.14c	Uncharacterized protein C365.14c	0	4	6	0	0.666667	6	1.5	0	1	1
19112858	SPBC2G5.05	Probable transketolase	0	18	21	0	0.857143	21	1.16667	0	1	1
19112859	SPBC2G5.06c	Sulfide:quinone oxidoreductase, mitochondrial	0	10	9	0	1.11111	9	0.9	0	1	1
19112869	SPBC25B2.09c	Probable arginyl-tRNA synthetase, cytoplasmic	0	10	19	0	0.526316	19	1.9	0	1	1
19112883	SPBC3E7.02c	Heat shock protein 16	0	5	6	0	0.833333	6	1.2	0	1	1
19112938	SPBC32F12.03c	Glutathione peroxidase	0	3	5	0	0.6	5	1.66667	0	1	1
19112979	SPBP4H10.13	40S ribosomal protein S23	0	2	3	0	0.666667	3	1.5	0	1	1
19112997	SPBC1703.10	GTP-binding protein ypt1	2	7	6	0.333333	1.16667	3	0.857143	0	1	1
19113000	SPBC1703.13c	Probable mitochondrial phosphate carrier protein	0	7	5	0	1.4	5	0.714286	0	1	1
19113059	SPBC30D10.18c	60S ribosomal protein L1-A	2	1	3	0.666667	0.333333	1.5	3	0	1	1
19113064	SPBC30D10.13c	Pyruvate dehydrogenase E1 component subunit beta, mitochondrial	0	4	7	0	0.571429	7	1.75	0	1	1
19113081	SPBC1778.06c	Fimbrin	0	10	14	0	0.714286	14	1.4	0	1	1
19113153	SPAC4F10.14c	Nascent polypeptide-associated complex subunit alpha	4	7	11	0.363636	0.636364	2.75	1.57143	0	1	1
19113156	SPBC25H2.02	Threonyl-tRNA synthetase, cytoplasmic	0	16	15	0	1.06667	15	0.9375	0	1	1
19113191	SPBC11C11.09c	60S ribosomal protein L5-B	0	10	12	0	0.833333	12	1.2	0	1	1
19113232	SPBC2G2.11	Glycylpeptide N-tetradecanoyltransferase	0	3	3	0	1	3	1	0	1	1
19113302	SPBP8B7.03c		6	15	18	0.333333	0.833333	3	1.2	0	1	1
19113305	SPBP8B7.06	60S acidic ribosomal protein P2-alpha	5	0	8	0.625	0	1.6	8	0	1	1
19113338	SPBC25D12.04	Ribonucleoside-diphosphate reductase small chain	0	3	3	0	1	3	1	0	1	1
19113343	SPBC13G1.02	Probable mannose-1-phosphate guanyltransferase	0	3	2	0	1.5	2	0.666667	0	1	1
19113360	SPBC31F10.06c	Small COPII coat GTPase sar1	2	5	6	0.333333	0.833333	3	1.2	0	1	1
19113427	SPBC1604.05	Glucose-6-phosphate isomerase	0	12	16	0	0.75	16	1.33333	0	1	1
19113450	SPBC3B9.01	Hsp70 nucleotide exchange factor fes1	0	4	6	0	0.666667	6	1.5	0	1	1
19113507	SPBC56F2.02	60S ribosomal protein L19-A	0	7	11	0	0.636364	11	1.57143	0	1	1
19113522	SPBC14F5.04c	Phosphoglycerate kinase	9	21	33	0.272727	0.636364	3.66667	1.57143	0	1	1
19113523	SPBC14F5.05c	S-adenosylmethionine synthetase	3	11	11	0.272727	1	3.66667	1	0	1	1
19113552	SPBC16G5.11c	BAG family molecular chaperone regulator 1A	2	1	3	0.666667	0.333333	1.5	3	0	1	1
19113597	SPBC16C6.07c	26S protease regulatory subunit 7 homolog	0	6	4	0	1.5	4	0.666667	0	1	1
19113697	SPAC977.14c	Putative aryl-alcohol dehydrogenase C977.14c	0	8	12	0	0.666667	12	1.5	0	1	1
19113699	SPAC977.16c	Dihydroxyacetone kinase 2	0	3	2	0	1.5	2	0.666667	0	1	1
19113728	SPAC5H10.03	Uncharacterized protein C5H10.03	0	3	5	0	0.6	5	1.66667	0	1	1
19113740	SPAC13G6.02c	SPAC13G6.02c	4	12	11	0.363636	1.09091	2.75	0.916667	0	1	1
19113783	SPAC1F5.02	Putative protein disulfide-isomerase C1F5.02	0	9	12	0	0.75	12	1.33333	0	1	1
19113806	SPAC12G12.04	Heat shock protein 60, mitochondrial	0	14	26	0	0.538462	26	1.85714	0	1	1
19113860	SPAC24H6.04	Hexokinase-1	0	9	6	0	1.5	6	0.666667	0	1	1
19113902	SPAC13A11.02c	Lanosterol 14-alpha demethylase erg11	0	3	3	0	1	3	1	0	1	1
19113921	SPAC1F3.06c	Sporulation-specific protein 15	0	5	7	0	0.714286	7	1.4	0	1	1
19114036	SPAC1687.06c	Probable 60S ribosomal protein L28e	3	5	6	0.5	0.833333	2	1.2	0	1	1
19114052	SPAC1687.21	Probable phosphoglycerate mutase C1687.21	0	2	3	0	0.666667	3	1.5	0	1	1
19114062	SPAC222.11	Probable coproporphyrinogen-III oxidase	0	9	7	0	1.28571	7	0.777778	0	1	1
19114063	SPAC222.12c	ATP synthase subunit beta, mitochondrial	2	10	18	0.111111	0.555556	9	1.8	0	1	1
19114101	SPAC23C4.17	Putative tRNA (cytosine-5-)-methyltransferase C23C4.17	0	2	2	0	1	2	1	0	1	1
19114117	SPAC30D11.12	60S ribosomal protein L38-2	3	1	3	1	0.333333	1	3	0	1	1
19114153	SPAC22A12.11	Dihydroxyacetone kinase 1	0	10	15	0	0.666667	15	1.5	0	1	1
19114164	SPAC10F6.01c	Sulfite reductase [NADPH] subunit beta	0	15	29	0	0.517241	29	1.93333	0	1	1
19114183	SPAC56E4.04c	Acetyl-CoA carboxylase	0	27	38	0	0.710526	38	1.40741	0	1	1
19114190	SPAC1420.03		0	7	6	0	1.16667	6	0.857143	0	1	1
19114192	SPAC1565.01	Altered inheritance rate of mitochondria protein 38 homolog	0	2	2	0	1	2	1	0	1	1
19114211	SPAC6F12.13c	Farnesyl pyrophosphate synthetase	0	4	4	0	1	4	1	0	1	1
19114235	SPAC20G8.06	General negative regulator of transcription subunit 1	0	8	5	0	1.6	5	0.625	0	1	1
19114258	SPAC9.03c	Pre-mRNA-splicing factor brr2	4	1	4	1	0.25	1	4	0	1	1
19114309	SPAC23H4.09	Curved DNA-binding protein	6	2	6	1	0.333333	1	3	0	1	1
19114312	SPAC23H4.06	Glutamine synthetase	0	6	8	0	0.75	8	1.33333	0	1	1
19114365	SPAC664.05	60S ribosomal protein L13	2	6	7	0.285714	0.857143	3.5	1.16667	0	1	1
19114489	SPAC17H9.07	Uncharacterized protein C17H9.07	0	2	2	0	1	2	1	0	1	1
19114496	SPAC17H9.14c	Protein disulfide-isomerase C17H9.14c	4	2	5	0.8	0.4	1.25	2.5	0	1	1
19114524	SPAC3C7.11c	Calnexin homolog	0	7	8	0	0.875	8	1.14286	0	1	1
19114527	SPAC3C7.14c		0	3	3	0	1	3	1	0	1	1
19114548	SPAC23C11.05	Inorganic pyrophosphatase	0	6	10	0	0.6	10	1.66667	0	1	1
19114563	SPAC13F5.03c	Glycerol dehydrogenase	0	3	5	0	0.6	5	1.66667	0	1	1
19114579	SPAC18G6.03	GTP-binding protein ypt3	0	4	4	0	1	4	1	0	1	1
19114616	SPAC13G7.02c	Probable heat shock protein ssa1	0	10	10	0	1	10	1	0	1	1
19114630	SPAC6C3.04	Probable citrate synthase, mitochondrial	0	7	8	0	0.875	8	1.14286	0	1	1
19114661	SPAC22H10.12c	Probable secretory pathway GDP dissociation inhibitor 1	0	2	2	0	1	2	1	0	1	1
19114771	SPAC4F8.14c		0	6	9	0	0.666667	9	1.5	0	1	1
19114777	SPAC4F8.07c	Hexokinase-2	0	9	16	0	0.5625	16	1.77778	0	1	1
19114815	SPAC6F6.10c	Actin-related protein 2/3 complex subunit 2	0	2	3	0	0.666667	3	1.5	0	1	1
19114819	SPAC6F6.15	GTP-binding protein ypt5	0	2	3	0	0.666667	3	1.5	0	1	1
19114917	SPAC31G5.05c	Ribulose-phosphate 3-epimerase	0	2	3	0	0.666667	3	1.5	0	1	1
19114926	SPAC31G5.13	26S proteasome regulatory subunit rpn11	0	3	3	0	1	3	1	0	1	1
19114929	SPAC31G5.16c	Dolichol-phosphate mannosyltransferase	0	3	5	0	0.6	5	1.66667	0	1	1
19114943	SPAC24C9.06c	Aconitate hydratase, mitochondrial	0	8	15	0	0.533333	15	1.875	0	1	1
19114981	SPAC688.11	Endocytosis protein end4	6	10	15	0.4	0.666667	2.5	1.5	0	1	1
19115079	SPAC8E11.02c	DNA damage checkpoint protein rad24	0	15	15	0	1	15	1	0	1	1
19115086	SPAC959.07		0	2	2	0	1	2	1	0	1	1
19115117	SPAC328.03	Alpha,alpha-trehalose-phosphate synthase [UDP-forming]	0	6	4	0	1.5	4	0.666667	0	1	1
19115124	SPAC328.10c	40S ribosomal protein S5-B	0	8	10	0	0.8	10	1.25	0	1	1
19115140	SPAC16E8.15	Eukaryotic translation initiation factor 4E-1	0	2	3	0	0.666667	3	1.5	0	1	1
19115159	SPAC17A2.13c	DNA damage checkpoint protein rad25	0	7	7	0	1	7	1	0	1	1
19115168	SPAC17G6.09	Translocation protein sec62	0	4	3	0	1.33333	3	0.75	0	1	1
19115224	SPAP7G5.02c	GMP synthase [glutamine-hydrolyzing]	3	7	10	0.3	0.7	3.33333	1.42857	0	1	1
19115227	SPAP7G5.05		0	7	8	0	0.875	8	1.14286	0	1	1
19115231	SPAC1556.02c	Probable succinate dehydrogenase [ubiquinone] flavoprotein subunit, mitochondrial	0	5	8	0	0.625	8	1.6	0	1	1
19115240	SPAC1F12.02c	Translationally-controlled tumor protein homolog	0	2	3	0	0.666667	3	1.5	0	1	1
19115245	SPAC1F12.07	Putative phosphoserine aminotransferase	3	5	8	0.375	0.625	2.66667	1.6	0	1	1
19115256	SPAC4H3.08	Uncharacterized oxidoreductase C4H3.08	0	2	2	0	1	2	1	0	1	1
19115270	SPAC1071.08	60S acidic ribosomal protein P2-C	2	0	3	0.666667	0	1.5	3	0	1	1
19115277	SPAC926.04c	Heat shock protein 90 homolog	9	26	43	0.209302	0.604651	4.77778	1.65385	0	1	1
19115282	SPAC926.09c	Fatty acid synthase subunit beta	10	33	51	0.196078	0.647059	5.1	1.54545	0	1	1
19115325	SPAPJ698.02c		0	8	11	0	0.727273	11	1.375	0	1	1
19115336	SPAC19G12.09	NAD/NADP-dependent indole-3-acetaldehyde reductase	0	5	7	0	0.714286	7	1.4	0	1	1
19115342	SPAC19G12.15c	Trehalose-phosphatase	0	4	7	0	0.571429	7	1.75	0	1	1
19115350	SPAC23A1.08c		0	3	3	0	1	3	1	0	1	1
19115354	SPAC23A1.12c	Phenylalanyl-tRNA synthetase beta chain	0	5	9	0	0.555556	9	1.8	0	1	1
19115403	SPAC1F7.05	Ribonucleoside-diphosphate reductase large chain	0	4	6	0	0.666667	6	1.5	0	1	1
19115448	SPAC27F1.07	Dolichyl-diphosphooligosaccharide--protein glycosyltransferase subunit 1	0	5	5	0	1	5	1	0	1	1
19115454	SPAC23D3.04c	Glycerol-3-phosphate dehydrogenase [NAD+] 2	0	3	2	0	1.5	2	0.666667	0	1	1
19115494	SPAC9E9.09c	Putative aldehyde dehydrogenase-like protein C9E9.09c	6	12	12	0.5	1	2	1	0	1	1
19115535	SPAC637.05c	V-type proton ATPase subunit B	4	7	13	0.307692	0.538462	3.25	1.85714	0	1	1
19115546	SPAC12B10.02c	Uncharacterized protein C12B10.02c	0	2	3	0	0.666667	3	1.5	0	1	1
19115551	SPAC12B10.07	F-actin-capping protein subunit alpha	0	3	4	0	0.75	4	1.33333	0	1	1
19115593	SPAC1834.02	Pentafunctional AROM polypeptide	0	14	26	0	0.538462	26	1.85714	0	1	1
19115625	SPAC1782.06c	Prohibitin-1	0	2	2	0	1	2	1	0	1	1
19115630	SPAC1782.11	Adenylyl-sulfate kinase	0	2	3	0	0.666667	3	1.5	0	1	1
19115699	SPAC1B3.03c	40 kDa peptidyl-prolyl cis-trans isomerase	0	5	7	0	0.714286	7	1.4	0	1	1
19115766	SPAC1006.07	ATP-dependent RNA helicase eIF4A	10	17	20	0.5	0.85	2	1.17647	0	1	1
19115779	SPAC29A4.15	Seryl-tRNA synthetase, cytoplasmic	0	8	9	0	0.888889	9	1.125	0	1	1
19115792	SPAC29A4.02c	Elongation factor 1-gamma	9	17	20	0.45	0.85	2.22222	1.17647	0	1	1
19115801	SPAC26F1.06	Phosphoglycerate mutase	2	12	18	0.111111	0.666667	9	1.5	0	1	1
19115804	SPAC26F1.03	Pyruvate dehydrogenase E1 component subunit alpha, mitochondrial	0	5	4	0	1.25	4	0.8	0	1	1
19115828	SPAC14C4.11	Vacuolar transporter chaperone 2	3	6	6	0.5	1	2	1	0	1	1
19115831	SPAC14C4.14	ATP synthase subunit alpha, mitochondrial	4	11	16	0.25	0.6875	4	1.45455	0	1	1
19115841	SPAC11E3.04c	Ubiquitin-conjugating enzyme E2 13	0	2	3	0	0.666667	3	1.5	0	1	1
19115850	SPAC11E3.13c	1,3-beta-glucanosyltransferase gas5	2	3	4	0.5	0.75	2	1.33333	0	1	1
19115873	SPAC4D7.08c	Amidophosphoribosyltransferase	6	2	5	1.2	0.4	0.833333	2.5	0	1	1
63054529	SPAC1565.08	Cell division cycle protein 48	2	15	20	0.1	0.75	10	1.33333	0	1	1
63054535	SPAC3A12.18	Glucose-6-phosphate 1-dehydrogenase	0	9	7	0	1.28571	7	0.777778	0	1	1
63054710	SPBPJ4664.07	Probable 26S proteasome regulatory subunit rpn3	0	2	3	0	0.666667	3	1.5	0	1	1
63054793	SPBC418.01c	Imidazole glycerol phosphate synthase hisHF	0	6	4	0	1.5	4	0.666667	0	1	1
162312116	SPCC1281.01	Cell wall alpha-1,3-glucan synthase ags1	0	6	8	0	0.75	8	1.33333	0	1	1
162312145	SPBC1198.14c	Fructose-1,6-bisphosphatase	0	3	4	0	0.75	4	1.33333	0	1	1
162312202	SPBC27.08c	Sulfate adenylyltransferase	2	12	15	0.133333	0.8	7.5	1.25	0	1	1
162312317	SPBC56F2.12	Probable ketol-acid reductoisomerase, mitochondrial	4	10	19	0.210526	0.526316	4.75	1.9	0	1	1
162312331	SPBC16C6.13c	Probable coatomer subunit beta'	2	4	5	0.4	0.8	2.5	1.25	0	1	1
162312408	SPAC1705.03c	Uncharacterized protein C1705.03c	2	0	2	1	0	1	2	0	1	1
162312422	SPAP14E8.01c	Heat shock protein homolog pss1	11	18	33	0.333333	0.545455	3	1.83333	0	1	1
162312426	SPAC767.01c	Vacuolar protein sorting-associated protein 1	0	4	4	0	1	4	1	0	1	1
162312432	SPAC631.01c	F-actin-capping protein subunit beta	0	3	4	0	0.75	4	1.33333	0	1	1
162312532	SPAC21E11.08	Serine palmitoyltransferase 2	0	2	2	0	1	2	1	0	1	1
295442915	SPAC1F8.07c		12	19	24	0.5	0.791667	2	1.26316	0	1	1
356624653	SPAC31G5.04		0	5	9	0	0.555556	9	1.8	0	1	1
1184029	SPAC343.12		0	0	4	0	0	4	4	0	2	2
1244555	SPBPJ4664.06		0	3	6	0	0.5	6	2	0	2	2
1310782	SPBC1734.14c		0	0	2	0	0	2	2	0	2	2
1374961	SPCC162.09c		0	0	3	0	0	3	3	0	2	2
1749424	SPBC16A3.08c		7	5	15	0.466667	0.333333	2.14286	3	0	2	2
1749436	SPCC777.09c		0	0	4	0	0	4	4	0	2	2
1749446	SPAC1002.18		0	1	2	0	0.5	2	2	0	2	2
1749460	SPCC757.07c		0	0	7	0	0	7	7	0	2	2
1749466	SPCC1827.06c		0	3	9	0	0.333333	9	3	0	2	2
1749476	SPBC29A10.08		0	0	2	0	0	2	2	0	2	2
1749486	SPAC27D7.06		0	1	3	0	0.333333	3	3	0	2	2
1749554	SPCC338.14		0	2	4	0	0.5	4	2	0	2	2
1749598	SPBC28F2.02		0	1	2	0	0.5	2	2	0	2	2
1749684	SPAC24B11.13		0	0	2	0	0	2	2	0	2	2
1749698	SPCC825.02		0	1	2	0	0.5	2	2	0	2	2
1778071	SPBC17A3.07		0	0	5	0	0	5	5	0	2	2
1794151	SPBC25H2.07		0	1	3	0	0.333333	3	3	0	2	2
9297067	SPCC1682.01		0	1	4	0	0.25	4	4	0	2	2
11493965	SPAC1805.17		0	0	5	0	0	5	5	0	2	2
13810439	SPAPB24D3.10c		0	0	3	0	0	3	3	0	2	2
14701591	SPAC4A8.11c		0	30	63	0	0.47619	63	2.1	0	2	2
19075198	SPCC613.10	Cytochrome b-c1 complex subunit 2, mitochondrial	0	0	6	0	0	6	6	0	2	2
19075205	SPCC330.05c	Orotidine 5'-phosphate decarboxylase	0	0	5	0	0	5	5	0	2	2
19075206	SPCC330.06c	Putative peroxiredoxin pmp20	0	1	6	0	0.166667	6	6	0	2	2
19075237	SPCC1235.11	UPF0041 protein C1235.11	0	1	3	0	0.333333	3	3	0	2	2
19075240	SPCC1235.14	High-affinity glucose transporter ght5	0	1	4	0	0.25	4	4	0	2	2
19075246	SPCC548.06c	Probable high-affinity hexose transporter ght8, mitochondrial	0	1	2	0	0.5	2	2	0	2	2
19075288	SPCC594.02c	Uncharacterized protein C594.02c	0	1	2	0	0.5	2	2	0	2	2
19075303	SPCC1682.10	26S proteasome regulatory subunit rpn8	0	0	2	0	0	2	2	0	2	2
19075325	SPCC4G3.13c	CUE domain-containing protein 4, mitochondrial	0	0	2	0	0	2	2	0	2	2
19075338	SPCC364.06	Putative nucleosome assembly protein C364.06	0	2	7	0	0.285714	7	3.5	0	2	2
19075377	SPCC1672.06c	Inositol hexakisphosphate and diphosphoinositol-pentakisphosphate kinase	0	0	2	0	0	2	2	0	2	2
19075404	SPCC5E4.05c	Probable serine hydrolase C5E4.05c	0	1	2	0	0.5	2	2	0	2	2
19075470	SPCC1393.12	Uncharacterized protein C1393.12	0	0	3	0	0	3	3	0	2	2
19075497	SPCC16A11.10c	Probable cytochrome b5 2	0	0	3	0	0	3	3	0	2	2
19075527	SPCPB16A4.03c	Bifunctional purine biosynthesis protein ade10	0	9	18	0	0.5	18	2	0	2	2
19075539	SPCC1795.05c	Probable uridylate kinase	0	1	3	0	0.333333	3	3	0	2	2
19075558	SPCC1259.02c	Uncharacterized zinc metalloprotease C1259.02c	0	1	5	0	0.2	5	5	0	2	2
19075583	SPCC4B3.07	Uncharacterized protein C4B3.07	0	0	2	0	0	2	2	0	2	2
19075598	SPCC550.06c	10 kDa heat shock protein, mitochondrial	0	0	5	0	0	5	5	0	2	2
19075603	SPCC550.11	Probable importin c550.11	0	0	3	0	0	3	3	0	2	2
19075623	SPCC645.14c	Heat shock protein sti1 homolog	0	1	17	0	0.0588235	17	17	0	2	2
19075624	SPCC23B6.01c	Oxysterol-binding protein homolog C23B6.01c	0	1	5	0	0.2	5	5	0	2	2
19075649	SPCC132.04c	Putative NAD-specific glutamate dehydrogenase	0	0	5	0	0	5	5	0	2	2
19075658	SPCC338.10c	Cytochrome c oxidase polypeptide 5, mitochondrial	0	1	5	0	0.2	5	5	0	2	2
19075662	SPCC338.05c	Ubiquitin-conjugating enzyme spm2	0	0	2	0	0	2	2	0	2	2
19075670	SPCC1281.06c	Probable acyl-CoA desaturase	0	2	4	0	0.5	4	2	0	2	2
19075684	SPCC622.12c	NADP-specific glutamate dehydrogenase	0	3	6	0	0.5	6	2	0	2	2
19075722	SPCC584.01c	Probable sulfite reductase [NADPH] flavoprotein component	0	3	13	0	0.230769	13	4.33333	0	2	2
19075725	SPCC584.04	Eukaryotic peptide chain release factor GTP-binding subunit	0	3	7	0	0.428571	7	2.33333	0	2	2
19075730	SPCC1753.04	3'(2'),5'-bisphosphate nucleotidase	0	1	6	0	0.166667	6	6	0	2	2
19075776	SPCC663.15c	Uncharacterized protein C663.15c	0	0	2	0	0	2	2	0	2	2
19075790	SPCC191.01	Uncharacterized protein C191.01	0	1	2	0	0.5	2	2	0	2	2
19075796	SPCC191.07	Cytochrome c	0	0	8	0	0	8	8	0	2	2
19075811	SPCC1450.12	PX domain-containing protein C1450.12	0	0	2	0	0	2	2	0	2	2
19075820	SPCC1442.06	Probable proteasome subunit alpha type-2	0	2	4	0	0.5	4	2	0	2	2
19075830	SPCC1442.16c	Probable quinone oxidoreductase	0	1	3	0	0.333333	3	3	0	2	2
19075836	SPCC285.08	Coatomer subunit delta	0	1	2	0	0.5	2	2	0	2	2
19075850	SPCC1223.05c		0	0	4	0	0	4	4	0	2	2
19075864	SPCC737.02c	Cytochrome b-c1 complex subunit 7	0	0	3	0	0	3	3	0	2	2
19075868	SPCC737.06c	Putative glutamate--cysteine ligase regulatory subunit	0	1	2	0	0.5	2	2	0	2	2
19075917	SPCC1739.09c	Cytochrome c oxidase subunit 6A, mitochondrial	0	0	2	0	0	2	2	0	2	2
19075934	SPCC576.07	Probable coatomer subunit zeta	0	1	2	0	0.5	2	2	0	2	2
19075936	SPCC576.09	40S ribosomal protein S20	2	1	4	0.5	0.25	2	4	0	2	2
19075955	SPCC126.12	Protein NIF3 homolog	0	0	2	0	0	2	2	0	2	2
19075977	SPCC830.07c	Protein psi1	0	0	2	0	0	2	2	0	2	2
19075978	SPCC830.08c	Protein yop1	0	1	3	0	0.333333	3	3	0	2	2
19076002	SPCC1840.03	Importin subunit beta-3	0	1	3	0	0.333333	3	3	0	2	2
19076004	SPCC1840.05c	Phosphoglucomutase-2	0	0	4	0	0	4	4	0	2	2
19076005	SPCC1840.06	ATP synthase subunit 5, mitochondrial	0	0	2	0	0	2	2	0	2	2
19076013	SPCC965.03	V-type proton ATPase subunit D	0	0	2	0	0	2	2	0	2	2
19076017	SPCC965.07c	Glutathione S-transferase 2	0	1	4	0	0.25	4	4	0	2	2
19076030	SPCC1494.05c	Probable ubiquitin carboxyl-terminal hydrolase 12	0	0	3	0	0	3	3	0	2	2
19076036	SPCC70.02c	Putative ATPase inhibitor, mitochondrial	0	0	2	0	0	2	2	0	2	2
19111863	SPBC1198.02	Adenosine deaminase	0	0	2	0	0	2	2	0	2	2
19111866	SPBC1198.05	Guanylate kinase	0	0	5	0	0	5	5	0	2	2
19111913	SPBC1773.06c	Zinc-type alcohol dehydrogenase-like protein C1773.06c	0	1	2	0	0.5	2	2	0	2	2
19111914	SPBC1773.07c	Ran-specific GTPase-activating protein 1	0	1	6	0	0.166667	6	6	0	2	2
19111938	SPBC1271.04c	Probable deoxyhypusine synthase	0	0	4	0	0	4	4	0	2	2
19111957	SPBC106.16	Probable proteasome subunit alpha type-7	0	3	6	0	0.5	6	2	0	2	2
19111958	SPBC106.17c	Uncharacterized protein C106.17c	0	0	3	0	0	3	3	0	2	2
19111972	SPBC428.02c	Branched-chain-amino-acid aminotransferase, mitochondrial	4	4	8	0.5	0.5	2	2	0	2	2
19111975	SPBC428.05c	Argininosuccinate synthase	0	2	5	0	0.4	5	2.5	0	2	2
19112005	SPBC1685.09	40S ribosomal protein S29	0	1	4	0	0.25	4	4	0	2	2
19112013	SPBC649.02	40S ribosomal protein S19-B	0	1	2	0	0.5	2	2	0	2	2
19112048	SPBC839.16	C-1-tetrahydrofolate synthase, cytoplasmic	0	1	10	0	0.1	10	10	0	2	2
19112049	SPBC839.17c	FK506-binding protein	0	1	5	0	0.2	5	5	0	2	2
19112053	SPBC947.15c	Probable NADH-ubiquinone oxidoreductase C947.15c, mitochondrial	0	2	11	0	0.181818	11	5.5	0	2	2
19112075	SPBC119.02	Ubiquitin-conjugating enzyme E2 4	0	1	2	0	0.5	2	2	0	2	2
19112083	SPBC119.10	Probable asparagine synthetase [glutamine-hydrolyzing]	0	3	9	0	0.333333	9	3	0	2	2
19112100	SPBC577.10	Probable proteasome subunit beta type-4	0	0	4	0	0	4	4	0	2	2
19112108	SPBC530.03c	BAG family molecular chaperone regulator 1B	0	0	2	0	0	2	2	0	2	2
19112123	SPBC36.03c	Uncharacterized transporter C36.03c	0	0	2	0	0	2	2	0	2	2
19112133	SPBC713.02c	Ubiquitin carboxyl-terminal hydrolase 21	0	3	13	0	0.230769	13	4.33333	0	2	2
19112140	SPBC713.09	Uncharacterized protein C713.09	0	0	2	0	0	2	2	0	2	2
19112143	SPBC713.12	Probable squalene monooxygenase	0	1	3	0	0.333333	3	3	0	2	2
19112154	SPBC646.04	Poly(A) polymerase pla1	0	1	2	0	0.5	2	2	0	2	2
19112155	SPBC646.05c	Squalene synthetase	0	1	3	0	0.333333	3	3	0	2	2
19112166	SPBC646.16	Probable proteasome subunit alpha type-6	0	1	3	0	0.333333	3	3	0	2	2
19112174	SPBP35G2.07	Acetolactate synthase, mitochondrial	3	3	8	0.375	0.375	2.66667	2.66667	0	2	2
19112195	SPBC146.14c	Coatomer subunit beta	0	0	2	0	0	2	2	0	2	2
19112203	SPBC337.10c	Protein dre2	0	0	2	0	0	2	2	0	2	2
19112227	SPAP27G11.06c	Valyl-tRNA synthetase	0	7	18	0	0.388889	18	2.57143	0	2	2
19112252	SPBC409.10	Phosphoribosylaminoimidazole-succinocarboxamide synthase	0	0	3	0	0	3	3	0	2	2
19112271	SPBC4.06	Probable acid phosphatase SPBC4.06	0	0	5	0	0	5	5	0	2	2
19112273	SPBC725.01	Aspartate aminotransferase, mitochondrial	0	0	2	0	0	2	2	0	2	2
19112282	SPBC725.10	Translocator protein homolog	0	1	2	0	0.5	2	2	0	2	2
19112287	SPBC725.15	Orotate phosphoribosyltransferase	0	0	7	0	0	7	7	0	2	2
19112317	SPBC3D6.13c	Uncharacterized protein C3D6.13c	0	1	2	0	0.5	2	2	0	2	2
19112361	SPBC8D2.06	Isoleucyl-tRNA synthetase, cytoplasmic	0	5	17	0	0.294118	17	3.4	0	2	2
19112364	SPBC8D2.10c	Ribosomal protein arginine N-methytransferase rmt3	0	0	3	0	0	3	3	0	2	2
19112374	SPBC8D2.20c	Protein transport protein sec31	0	0	13	0	0	13	13	0	2	2
19112414	SPBC11B10.02c	Histidinol-phosphate aminotransferase	0	0	3	0	0	3	3	0	2	2
19112424	SPBC1215.02c	N-terminal acetyltransferase B complex subunit arm1	0	1	2	0	0.5	2	2	0	2	2
19112442	SPBC83.17	Multiprotein-bridging factor 1	2	2	6	0.333333	0.333333	3	3	0	2	2
19112471	SPBC21B10.08c	Uncharacterized protein C21B10.08c	0	2	5	0	0.4	5	2.5	0	2	2
19112502	SPBC2F12.05c	Oxysterol-binding protein homolog C2F12.05c	0	2	5	0	0.4	5	2.5	0	2	2
19112520	SPBC18H10.04c	Probable RNA-binding protein sce3	2	3	10	0.2	0.3	5	3.33333	0	2	2
19112542	SPBC9B6.08	Clathrin light chain	0	0	2	0	0	2	2	0	2	2
19112544	SPBC9B6.10	Hsp90 co-chaperone Cdc37	0	0	2	0	0	2	2	0	2	2
19112560	SPBC3H7.07c	Probable phosphoserine phosphatase	0	1	2	0	0.5	2	2	0	2	2
19112564	SPBC3H7.03c	2-oxoglutarate dehydrogenase E1 component, mitochondrial	0	1	11	0	0.0909091	11	11	0	2	2
19112579	SPBC16E9.05	Sterol 24-C-methyltransferase	0	2	9	0	0.222222	9	4.5	0	2	2
19112619	SPBP23A10.15c	Probable mitochondrial-processing peptidase subunit beta	0	1	10	0	0.1	10	10	0	2	2
19112638	SPBC29A3.18	Cytochrome c1, heme protein, mitochondrial	0	2	4	0	0.5	4	2	0	2	2
19112645	SPBC18E5.07	Uncharacterized serine-rich protein C18E5.07	0	0	3	0	0	3	3	0	2	2
19112655	SPBC23G7.05		0	0	3	0	0	3	3	0	2	2
19112665	SPBC23G7.15c	60S acidic ribosomal protein P2-beta	0	1	3	0	0.333333	3	3	0	2	2
19112669	SPBC1711.04	Methylenetetrahydrofolate dehydrogenase [NAD+]	0	0	5	0	0	5	5	0	2	2
19112699	SPBC14C8.04	Probable acetolactate synthase small subunit	0	1	3	0	0.333333	3	3	0	2	2
19112724	SPBC21H7.07c	Imidazoleglycerol-phosphate dehydratase	0	1	2	0	0.5	2	2	0	2	2
19112782	SPBC36B7.08c	Putative nucleosome assembly protein C36B7.08c	0	0	2	0	0	2	2	0	2	2
19112790	SPBC1921.05	Aminopeptidase 1	0	0	4	0	0	4	4	0	2	2
19112793	SPBC21D10.12	Protein hob1	0	0	2	0	0	2	2	0	2	2
19112807	SPBC12C2.07c	Spermidine synthase	0	3	7	0	0.428571	7	2.33333	0	2	2
19112808	SPBC12C2.06	ATP-dependent RNA helicase dbp5	0	1	3	0	0.333333	3	3	0	2	2
19112810	SPBC12C2.04	Uncharacterized protein C12C2.04	0	1	2	0	0.5	2	2	0	2	2
19112833	SPBC365.12c	Stress response protein ish1	0	0	3	0	0	3	3	0	2	2
19112838	SPBC29A10.01	NADPH--cytochrome P450 reductase	0	1	2	0	0.5	2	2	0	2	2
19112850	SPBC29A10.13	ATP synthase subunit d, mitochondrial	0	0	5	0	0	5	5	0	2	2
19112884	SPBC3E7.05c	Uncharacterized protein C3E7.05c	0	0	2	0	0	2	2	0	2	2
19112886	SPBC3E7.07c	UPF0368 protein C3E7.07c	0	0	7	0	0	7	7	0	2	2
19112910	SPBC4F6.18c	ADP-ribosylation factor 1	3	5	12	0.25	0.416667	4	2.4	0	2	2
19112922	SPBC336.10c	Eukaryotic translation initiation factor 5A-2	0	3	7	0	0.428571	7	2.33333	0	2	2
19112945	SPBC32F12.10	Probable phosphoglucomutase	0	5	10	0	0.5	10	2	0	2	2
19112954	SPBC19C7.06	Putative prolyl-tRNA synthetase C19C7.06	0	8	18	0	0.444444	18	2.25	0	2	2
19112963	SPBP19A11.03c	26S proteasome regulatory subunit rpn1	0	1	4	0	0.25	4	4	0	2	2
19113023	SPBC2D10.12	UV excision repair protein rhp23	0	0	3	0	0	3	3	0	2	2
19113047	SPBC15D4.15	4-nitrophenylphosphatase	0	3	7	0	0.428571	7	2.33333	0	2	2
19113051	SPBC13E7.04	ATP synthase subunit delta, mitochondrial	0	0	4	0	0	4	4	0	2	2
19113072	SPBC30D10.05c	Uncharacterized oxidoreductase C30D10.05c	0	0	7	0	0	7	7	0	2	2
19113087	SPBC4C3.10c	Probable proteasome subunit beta type-6	0	0	2	0	0	2	2	0	2	2
19113095	SPBC4C3.03	Probable homoserine kinase	0	0	2	0	0	2	2	0	2	2
19113096	SPBC405.01	Bifunctional purine biosynthetic protein ADE1	0	1	9	0	0.111111	9	9	0	2	2
19113110	SPBC776.03	Probable homoserine dehydrogenase	0	2	12	0	0.166667	12	6	0	2	2
19113114	SPBC776.07	Mitochondrial acidic protein mam33	0	0	3	0	0	3	3	0	2	2
19113123	SPBC776.15c	Probable dihydrolipoyllysine-residue succinyltransferase component of 2-oxoglutarate dehydrogenase complex, mitochondrial	0	1	4	0	0.25	4	4	0	2	2
19113147	SPBC25H2.12c	Probable T-complex protein 1 subunit eta	0	3	6	0	0.5	6	2	0	2	2
19113149	SPBC25H2.09	Uncharacterized protein C25H2.09	0	0	3	0	0	3	3	0	2	2
19113173	SPBC17D11.07c	26S proteasome regulatory subunit rpn2	0	1	4	0	0.25	4	4	0	2	2
19113209	SPBC13A2.04c	Probable peptide transporter ptr2	0	0	2	0	0	2	2	0	2	2
19113225	SPBC2G2.04c	Protein mmf1, mitochondrial	0	0	3	0	0	3	3	0	2	2
19113233	SPBC2G2.12	Histidyl-tRNA synthetase	4	3	12	0.333333	0.25	3	4	0	2	2
19113237	SPBC2G2.16	Mannose-6-phosphate isomerase	0	1	3	0	0.333333	3	3	0	2	2
19113250	SPBC1105.02c	Homocitrate synthase, mitochondrial	0	2	8	0	0.25	8	4	0	2	2
19113283	SPBC887.17	Putative xanthine/uracil permease C887.17	0	0	2	0	0	2	2	0	2	2
19113295	SPBC16D10.08c	Heat shock protein 104	0	10	24	0	0.416667	24	2.4	0	2	2
19113296	SPBC16D10.09	PCNA, Proliferating cell nuclear antigen	0	0	4	0	0	4	4	0	2	2
19113304	SPBP8B7.05c	Carbonic anhydrase	0	1	6	0	0.166667	6	6	0	2	2
19113324	SPBP8B7.25	Peptidyl-prolyl cis-trans isomerase B	0	1	5	0	0.2	5	5	0	2	2
19113334	SPBC19F5.04	Probable aspartokinase	0	0	2	0	0	2	2	0	2	2
19113370	SPBC31F10.16	Uncharacterized protein C31F10.16	0	0	2	0	0	2	2	0	2	2
19113384	SPBC21C3.12c	Thioredoxin domain-containing protein C21C3.12c	0	0	3	0	0	3	3	0	2	2
19113402	SPBC23E6.10c	Methylthioribose-1-phosphate isomerase	0	0	2	0	0	2	2	0	2	2
19113421	SPBC1604.11	ATP synthase subunit f, mitochondrial	0	0	2	0	0	2	2	0	2	2
19113425	SPBC1604.07	ATP synthase subunit 4, mitochondrial	0	1	4	0	0.25	4	4	0	2	2
19113433	SPBC1677.03c	Threonine dehydratase, mitochondrial	0	0	8	0	0	8	8	0	2	2
19113439	SPBC26H8.06	Monothiol glutaredoxin-5	0	1	2	0	0.5	2	2	0	2	2
19113469	SPBC3B9.19	GrpE protein homolog, mitochondrial	0	1	3	0	0.333333	3	3	0	2	2
19113474	SPBC215.05		0	3	11	0	0.272727	11	3.66667	0	2	2
19113477	SPBC215.08c	Carbamoyl-phosphate synthase arginine-specific large chain	0	0	19	0	0	19	19	0	2	2
19113480	SPBC215.11c	Uncharacterized oxidoreductase C215.11c	0	0	4	0	0	4	4	0	2	2
19113484	SPBC215.15	Protein transport protein sec13	0	1	4	0	0.25	4	4	0	2	2
19113521	SPBC14F5.03c	Probable importin subunit beta-4	0	1	3	0	0.333333	3	3	0	2	2
19113527	SPBC14F5.09c	Adenylosuccinate lyase	0	4	15	0	0.266667	15	3.75	0	2	2
19113533	SPBC3F6.02c	Sterol-4-alpha-carboxylate 3-dehydrogenase, decarboxylating	0	1	3	0	0.333333	3	3	0	2	2
19113537	SPBC342.02	Probable glutaminyl-tRNA synthetase	0	3	13	0	0.230769	13	4.33333	0	2	2
19113546	SPBC16G5.05c	Vesicle-associated membrane protein-associated protein C16G5.05c	0	0	3	0	0	3	3	0	2	2
19113579	SPBC16A3.02c	Zinc-type alcohol dehydrogenase-like protein C16A3.02c	0	1	6	0	0.166667	6	6	0	2	2
19113598	SPBC16C6.08c	Cytochrome b-c1 complex subunit 6	0	0	4	0	0	4	4	0	2	2
19113601	SPBC16C6.11	60S ribosomal protein L32-B	0	2	4	0	0.5	4	2	0	2	2
19113609	SPBC1539.03c	Probable argininosuccinate lyase	0	1	2	0	0.5	2	2	0	2	2
19113610	SPBC1539.04	UPF0121 membrane protein C1539.04	0	1	2	0	0.5	2	2	0	2	2
19113612	SPBC1539.06	Putative acyl-CoA-binding protein	0	0	3	0	0	3	3	0	2	2
19113635	SPBC8E4.04	Uncharacterized oxidoreductase C8E4.04	0	2	5	0	0.4	5	2.5	0	2	2
19113639	SPBP4G3.02	Acid phosphatase	0	0	2	0	0	2	2	0	2	2
19113711	SPAC11D3.02c	UPF0039 protein C11D3.02c	0	0	2	0	0	2	2	0	2	2
19113713	SPAC11D3.04c	Uncharacterized protein C11D3.04c	0	0	2	0	0	2	2	0	2	2
19113722	SPAC11D3.15	Uncharacterized protein C11D3.15	0	0	2	0	0	2	2	0	2	2
19113744	SPAC13G6.06c	Putative glycine dehydrogenase [decarboxylating], mitochondrial	0	0	5	0	0	5	5	0	2	2
19113747	SPAC13G6.09	Uncharacterized protein C13G6.09	0	0	2	0	0	2	2	0	2	2
19113769	SPAC806.07	Nucleoside diphosphate kinase	0	0	3	0	0	3	3	0	2	2
19113779	SPAC1F5.06	Heat shock protein 70 homolog	0	0	5	0	0	5	5	0	2	2
19113803	SPAC12G12.07c	Uncharacterized protein C12G12.07c	0	0	4	0	0	4	4	0	2	2
19113810	SPAC630.03	Actin-related protein 3	0	1	4	0	0.25	4	4	0	2	2
19113854	SPAC24H6.10c	Putative phospho-2-dehydro-3-deoxyheptonate aldolase	0	0	5	0	0	5	5	0	2	2
19113905	SPAC13A11.05	Putative aminopeptidase C13A11.05	0	0	7	0	0	7	7	0	2	2
19113912	SPAC3H8.07c	Probable prefoldin subunit 3	0	0	2	0	0	2	2	0	2	2
19113915	SPAC3H8.10	Sec14 cytosolic factor	0	1	3	0	0.333333	3	3	0	2	2
19113929	SPAC1D4.04	Probable T-complex protein 1 subunit beta	0	1	4	0	0.25	4	4	0	2	2
19113946	SPAC22F3.07c	Uncharacterized protein C22F3.07c	0	0	3	0	0	3	3	0	2	2
19113954	SPAC1296.02	Cytochrome c oxidase subunit 4, mitochondrial	0	0	7	0	0	7	7	0	2	2
19113967	SPAC22G7.06c	Protein ura1	0	21	46	0	0.456522	46	2.19048	0	2	2
19113988	SPAC16C9.02c	Uncharacterized protein C16C9.02c	0	0	7	0	0	7	7	0	2	2
19113999	SPAC2G11.07c	Protein phosphatase 2C homolog 3	0	1	2	0	0.5	2	2	0	2	2
19114010	SPAC521.03	Uncharacterized oxidoreductase C521.03	0	0	9	0	0	9	9	0	2	2
19114023	SPAC23G3.11	Probable 26S proteasome regulatory subunit rpn6	0	1	2	0	0.5	2	2	0	2	2
19114024	SPAC23G3.12c	PDZ domain-containing protein C23G3.12c	0	0	8	0	0	8	8	0	2	2
19114075	SPAC821.10c	Superoxide dismutase [Cu-Zn]	0	0	2	0	0	2	2	0	2	2
19114087	SPAC23C4.02	Coronin-like protein crn1	0	4	9	0	0.444444	9	2.25	0	2	2
19114093	SPAC23C4.09c	Uncharacterized protein C23C4.09c	0	0	2	0	0	2	2	0	2	2
19114149	SPAC22A12.07c	Dolichyl-phosphate-mannose--protein mannosyltransferase 1	0	0	5	0	0	5	5	0	2	2
19114152	SPAC22A12.10	Uncharacterized CDP-alcohol phosphatidyltransferase class-I family protein C22A12.10	0	0	2	0	0	2	2	0	2	2
19114158	SPAC22A12.16	Probable ATP-citrate synthase subunit 2	2	7	14	0.142857	0.5	7	2	0	2	2
19114166	SPAC10F6.03c	CTP synthase	0	3	6	0	0.5	6	2	0	2	2
19114169	SPAC10F6.06	Protein vip1	0	5	10	0	0.5	10	2	0	2	2
19114182	SPAC56E4.03	Aromatic amino acid aminotransferase C56E4.03	0	0	7	0	0	7	7	0	2	2
19114189	SPAC1420.02c	T-complex protein 1 subunit epsilon	0	2	4	0	0.5	4	2	0	2	2
19114208	SPAC6F12.10c	Probable phosphoribosylformylglycinamidine synthase	0	3	17	0	0.176471	17	5.66667	0	2	2
19114226	SPAC57A10.09c	Non-histone chromosomal protein 6	0	0	2	0	0	2	2	0	2	2
19114229	SPAC57A10.12c	Dihydroorotate dehydrogenase, mitochondrial	0	1	3	0	0.333333	3	3	0	2	2
19114233	SPAC20G8.04c	Probable electron transfer flavoprotein-ubiquinone oxidoreductase, mitochondrial	0	1	3	0	0.333333	3	3	0	2	2
19114252	SPAC3A12.14	Calmodulin	0	0	3	0	0	3	3	0	2	2
19114264	SPAC9.09	Probable 5-methyltetrahydropteroyltriglutamate--homocysteine methyltransferase	0	16	36	0	0.444444	36	2.25	0	2	2
19114283	SPAC57A7.10c	Probable coatomer subunit gamma	3	2	8	0.375	0.25	2.66667	4	0	2	2
19114303	SPAC23H4.15	Ribosome biogenesis protein tsr1 homolog	0	0	3	0	0	3	3	0	2	2
19114337	SPAC343.05	V-type proton ATPase catalytic subunit A	0	5	12	0	0.416667	12	2.4	0	2	2
19114341	SPAC343.09	UBX domain-containing protein 3	0	0	2	0	0	2	2	0	2	2
19114349	SPAC343.16	Homoaconitase, mitochondrial	0	1	9	0	0.111111	9	9	0	2	2
19114408	SPAC1002.09c	Dihydrolipoyl dehydrogenase, mitochondrial	0	2	8	0	0.25	8	4	0	2	2
19114411	SPAC1002.12c	Putative succinate-semialdehyde dehydrogenase C1002.12c [NADP+]	0	1	2	0	0.5	2	2	0	2	2
19114417	SPAC1002.17c	Putative uracil phosphoribosyltransferase urg2	0	1	3	0	0.333333	3	3	0	2	2
19114442	SPAC140.01	Succinate dehydrogenase [ubiquinone] iron-sulfur subunit, mitochondrial	0	2	6	0	0.333333	6	3	0	2	2
19114459	SPAC3H1.05	Probable CAAX prenyl protease 1	0	0	3	0	0	3	3	0	2	2
19114461	SPAC3H1.07	Arginase	0	2	5	0	0.4	5	2.5	0	2	2
19114472	SPAC9G1.05	Uncharacterized WD repeat-containing protein C9G1.05	0	0	3	0	0	3	3	0	2	2
19114506	SPAC607.05	Probable 26S proteasome regulatory subunit rpn9	0	1	3	0	0.333333	3	3	0	2	2
19114549	SPAC23C11.06c	Uncharacterized protein C23C11.06c	0	0	3	0	0	3	3	0	2	2
19114552	SPAC23C11.09	Probable alanyl-tRNA synthetase, cytoplasmic	0	5	18	0	0.277778	18	3.6	0	2	2
19114556	SPAC23C11.13c	Uncharacterized protein C23C11.13c	0	1	5	0	0.2	5	5	0	2	2
19114581	SPAC18G6.05c	Translational activator gcn1	0	3	11	0	0.272727	11	3.66667	0	2	2
19114597	SPAC4G9.03	Adenylate kinase 1	0	3	10	0	0.3	10	3.33333	0	2	2
19114603	SPAC4G9.09c	Protein arg11, mitochondrial	0	2	6	0	0.333333	6	3	0	2	2
19114606	SPAC4G9.12	Probable gluconokinase	0	2	4	0	0.5	4	2	0	2	2
19114620	SPAC13G7.06	Probable phosphoadenosine phosphosulfate reductase	0	0	2	0	0	2	2	0	2	2
19114639	SPAC17G8.04c	Actin-related protein 2/3 complex subunit 5	0	0	2	0	0	2	2	0	2	2
19114641	SPAC17G8.06c	Putative dihydroxy-acid dehydratase, mitochondrial	0	0	6	0	0	6	6	0	2	2
19114651	SPAC22H10.03c	Importin subunit beta-5	0	0	2	0	0	2	2	0	2	2
19114689	SPAC19A8.15	Tryptophan synthase	0	2	6	0	0.333333	6	3	0	2	2
19114700	SPAC19A8.04	Cytochrome P450 61	0	3	8	0	0.375	8	2.66667	0	2	2
19114711	SPAC23H3.09c	Probable threonine aldolase	0	0	5	0	0	5	5	0	2	2
19114764	SPAC7D4.07c	Thioredoxin-1	0	0	4	0	0	4	4	0	2	2
19114785	SPAC644.05c	Probable deoxyuridine 5'-triphosphate nucleotidohydrolase	0	0	3	0	0	3	3	0	2	2
19114795	SPAC644.15	60S acidic ribosomal protein P1-alpha 1	0	1	3	0	0.333333	3	3	0	2	2
19114800	SPAPB2B4.02	Monothiol glutaredoxin-4	0	0	2	0	0	2	2	0	2	2
19114825	SPAC1805.02c	Probable electron transfer flavoprotein subunit beta	0	1	2	0	0.5	2	2	0	2	2
19114829	SPAC1805.06c	Delta-aminolevulinic acid dehydratase	0	0	3	0	0	3	3	0	2	2
19114842	SPAC1B2.03c	Putative elongation of fatty acids protein 1	0	1	2	0	0.5	2	2	0	2	2
19114843	SPAC1B2.04	Cytochrome c oxidase subunit 6, mitochondrial	0	0	2	0	0	2	2	0	2	2
19114847	SPAC3F10.03	Putative glycyl-tRNA synthetase	2	7	14	0.142857	0.5	7	2	0	2	2
19114874	SPACUNK4.16c	Putative alpha,alpha-trehalose-phosphate synthase [UDP-forming] 106 kDa subunit	0	2	7	0	0.285714	7	3.5	0	2	2
19114878	SPACUNK4.12c	Putative zinc protease mug138	0	0	2	0	0	2	2	0	2	2
19114883	SPAPYUK71.01	Cation-transporting ATPase 4	0	0	5	0	0	5	5	0	2	2
19114886	SPAPYUK71.03c	Uncharacterized protein PYUK71.03c	0	0	2	0	0	2	2	0	2	2
19114893	SPAC513.07	Putative uncharacterized oxidoreductase C513.07	0	1	4	0	0.25	4	4	0	2	2
19114905	SPAPB24D3.07c	Uncharacterized protein PB24D3.07c	0	0	2	0	0	2	2	0	2	2
19114936	SPAC1786.02	Probable lysophospholipase C1786.02	0	1	5	0	0.2	5	5	0	2	2
19114939	SPAC24C9.03	Diphosphomevalonate decarboxylase	0	0	2	0	0	2	2	0	2	2
19114966	SPAC589.06c	Uncharacterized protein C589.06c	0	0	5	0	0	5	5	0	2	2
19114970	SPAC589.10c	Ubiquitin	4	3	9	0.444444	0.333333	2.25	3	0	2	2
19114990	SPAC3G9.06	Phenylalanyl-tRNA synthetase alpha chain	0	6	12	0	0.5	12	2	0	2	2
19114995	SPAC3G9.11c	Putative pyruvate decarboxylase C3G9.11c	0	3	7	0	0.428571	7	2.33333	0	2	2
19115001	SPAC1486.01	Superoxide dismutase [Mn], mitochondrial	0	1	6	0	0.166667	6	6	0	2	2
19115004	SPAC1486.04c	Abnormal long morphology protein 1	0	0	4	0	0	4	4	0	2	2
19115005	SPAC1486.05	Nucleoporin nup189	0	0	3	0	0	3	3	0	2	2
19115013	SPAC6G10.04c	Probable proteasome subunit alpha type-1	0	3	9	0	0.333333	9	3	0	2	2
19115017	SPAC6G10.08	Probable isocitrate dehydrogenase [NADP], mitochondrial	0	0	4	0	0	4	4	0	2	2
19115018	SPAC6G10.09	Probable mannosyl-oligosaccharide glucosidase	0	0	7	0	0	7	7	0	2	2
19115028	SPAC6G9.07c	Actin-related protein 2/3 complex subunit 4	0	1	2	0	0.5	2	2	0	2	2
19115045	SPAPB1E7.07	Putative glutamate synthase [NADPH]	0	0	18	0	0	18	18	0	2	2
19115060	SPAC26A3.05	Probable clathrin heavy chain	0	10	21	0	0.47619	21	2.1	0	2	2
19115066	SPAC26A3.11	UPF0012 hydrolase C26A3.11	0	1	2	0	0.5	2	2	0	2	2
19115073	SPAC8E11.10	Sorbose reductase sou1	0	0	4	0	0	4	4	0	2	2
19115081	SPAC959.02	Probable vesicular-fusion protein sec17 homolog	0	0	2	0	0	2	2	0	2	2
19115105	SPAC3A11.10c	Uncharacterized dipeptidase C3A11.10c	0	0	2	0	0	2	2	0	2	2
19115108	SPAC3A11.07	Probable NADH-ubiquinone oxidoreductase C3A11.07, mitochondrial	0	2	10	0	0.2	10	5	0	2	2
19115125	SPAC16E8.01	Actin cytoskeleton-regulatory complex protein sla1	0	1	4	0	0.25	4	4	0	2	2
19115145	SPAC1B1.03c	Importin subunit beta-1	0	0	3	0	0	3	3	0	2	2
19115173	SPAC17G6.14c	ATP-dependent RNA helicase uap56	0	2	5	0	0.4	5	2.5	0	2	2
19115182	SPAC1142.06	ATPase get3	0	1	3	0	0.333333	3	3	0	2	2
19115187	SPAC8C9.04	Meiotically up-regulated protein C8C9.04	0	1	4	0	0.25	4	4	0	2	2
19115188	SPAC8C9.05	D-tyrosyl-tRNA(Tyr) deacylase	0	0	2	0	0	2	2	0	2	2
19115203	SPAC15A10.04c	Zinc finger protein zpr1	2	3	8	0.25	0.375	4	2.66667	0	2	2
19115217	SPAC15E1.04	Probable thymidylate synthase	0	0	2	0	0	2	2	0	2	2
19115226	SPAP7G5.04c	L-aminoadipate-semialdehyde dehydrogenase	0	6	21	0	0.285714	21	3.5	0	2	2
19115234	SPAC1556.05c	rRNA-processing protein cgr1	0	0	2	0	0	2	2	0	2	2
19115255	SPAC4H3.07c	Uncharacterized protein C4H3.07c	0	0	3	0	0	3	3	0	2	2
19115284	SPAC323.02c	Probable proteasome subunit alpha type-5	0	1	5	0	0.2	5	5	0	2	2
19115300	SPAC2F3.09	5-aminolevulinate synthase, mitochondrial	0	1	3	0	0.333333	3	3	0	2	2
19115309	SPAC11G7.03	Isocitrate dehydrogenase [NAD] subunit 1, mitochondrial	0	2	8	0	0.25	8	4	0	2	2
19115315	SPAC27E2.03c	Uncharacterized GTP-binding protein C27E2.03c	2	4	9	0.222222	0.444444	4.5	2.25	0	2	2
19115335	SPAC19G12.08	Inositolphosphorylceramide-B C-26 hydroxylase-like protein C19G12.08	0	1	3	0	0.333333	3	3	0	2	2
19115337	SPAC19G12.10c	Carboxypeptidase Y	0	0	4	0	0	4	4	0	2	2
19115345	SPAC23A1.03		0	2	5	0	0.4	5	2.5	0	2	2
19115384	SPAC25B8.12c	Uncharacterized hydrolase C25B8.12c	0	4	10	0	0.4	10	2.5	0	2	2
19115396	SPAC694.04c	UPF0160 protein C694.04c	0	1	6	0	0.166667	6	6	0	2	2
19115406	SPAC1F7.08	Iron transport multicopper oxidase fio1	0	0	3	0	0	3	3	0	2	2
19115410	SPAC1F7.12	Aldo-keto reductase yakc [NADP+]	0	1	3	0	0.333333	3	3	0	2	2
19115437	SPAC25G10.05c	ATP phosphoribosyltransferase	0	0	6	0	0	6	6	0	2	2
19115442	SPAC27F1.02c	Tropomyosin	0	0	7	0	0	7	7	0	2	2
19115456	SPAC23D3.07	Probable proteasome subunit beta type-7	0	0	2	0	0	2	2	0	2	2
19115476	SPAC29E6.06c	SPAC29E6.06c	0	0	4	0	0	4	4	0	2	2
19115488	SPAC9E9.03	3-isopropylmalate dehydratase	0	5	13	0	0.384615	13	2.6	0	2	2
19115489	SPAC9E9.04	Uncharacterized protein C9E9.04	0	0	4	0	0	4	4	0	2	2
19115491	SPAC9E9.06c	Threonine synthase	0	3	10	0	0.3	10	3.33333	0	2	2
19115496	SPAC9E9.11	Pyridoxal reductase	0	2	7	0	0.285714	7	3.5	0	2	2
19115498	SPAC9E9.13	Protein wos2	0	0	4	0	0	4	4	0	2	2
19115514	SPAC17C9.03	Eukaryotic translation initiation factor 4 gamma	4	7	18	0.222222	0.388889	4.5	2.57143	0	2	2
19115540	SPAC637.10c		0	0	2	0	0	2	2	0	2	2
19115562	SPAC1093.02	Probable pyridoxamine 5'-phosphate oxidase	0	0	3	0	0	3	3	0	2	2
19115566	SPAC30C2.02	Deoxyhypusine hydroxylase	0	1	6	0	0.166667	6	6	0	2	2
19115572	SPAC30C2.08	UPF0662 protein C30C2.08	0	1	4	0	0.25	4	4	0	2	2
19115573	SPAC1635.01	Probable mitochondrial outer membrane protein porin	0	4	8	0	0.5	8	2	0	2	2
19115576	SPAC144.03	Adenylosuccinate synthetase	0	2	10	0	0.2	10	5	0	2	2
19115585	SPAC144.12	Ribose-5-phosphate isomerase	0	0	2	0	0	2	2	0	2	2
19115618	SPAPYUG7.05	Pyrroline-5-carboxylate reductase	0	0	3	0	0	3	3	0	2	2
19115641	SPAC22F8.06	Probable proteasome subunit beta type-1	0	1	6	0	0.166667	6	6	0	2	2
19115643	SPAC22F8.08	Protein transport protein sec24	0	1	2	0	0.5	2	2	0	2	2
19115653	SPAC20G4.06c	Cofilin	0	2	5	0	0.4	5	2.5	0	2	2
19115669	SPAC4F10.14c	Nascent polypeptide-associated complex subunit beta	2	0	7	0.285714	0	3.5	7	0	2	2
19115675	SPAC4F10.20	Glutaredoxin-1	0	0	4	0	0	4	4	0	2	2
19115697	SPAC1B3.01c	Probable uracil phosphoribosyltransferase 1	0	1	2	0	0.5	2	2	0	2	2
19115723	SPAC1952.09c	Acetyl-CoA hydrolase	0	1	3	0	0.333333	3	3	0	2	2
19115745	SPAC22E12.07	Ran GTPase-activating protein 1	0	1	5	0	0.2	5	5	0	2	2
19115756	SPAC22E12.18	Uncharacterized protein C22E12.18	0	0	3	0	0	3	3	0	2	2
19115774	SPAC29A4.20	Probable elongator complex protein 3	0	0	2	0	0	2	2	0	2	2
19115794	SPAC26F1.13c	Putative leucyl-tRNA synthetase, cytoplasmic	0	7	19	0	0.368421	19	2.71429	0	2	2
19115800	SPAC26F1.07	Uncharacterized oxidoreductase C26F1.07	0	4	10	0	0.4	10	2.5	0	2	2
19115844	SPAC11E3.07	V-type proton ATPase subunit E	0	0	2	0	0	2	2	0	2	2
19115855	SPAP8A3.04c	Heat shock protein hsp9	0	0	3	0	0	3	3	0	2	2
19115858	SPAP8A3.07c	Phospho-2-dehydro-3-deoxyheptonate aldolase, tyrosine-inhibited	0	3	8	0	0.375	8	2.66667	0	2	2
19115863	SPAP8A3.12c	Putative tripeptidyl-peptidase P8A3.12c	0	0	6	0	0	6	6	0	2	2
19115894	SPAC29B12.04	Probable pyridoxine biosynthesis PDX1-like protein	0	4	12	0	0.333333	12	3	0	2	2
63054446	SPCC663.01c	Extragenic suppressor of kinetochore protein 1	0	0	4	0	0	4	4	0	2	2
63054448	SPCC191.02c	Probable acetyl-coenzyme A synthetase	0	5	13	0	0.384615	13	2.6	0	2	2
63054453	SPCC1223.14	Chorismate synthase	0	1	5	0	0.2	5	5	0	2	2
63054631	SPAC1F7.01c	Transcription elongation factor spt6	0	0	7	0	0	7	7	0	2	2
63054654	SPAC19B12.06c	Uncharacterized rhomboid protein C19B12.06c	0	0	2	0	0	2	2	0	2	2
67989891	SPAC23C4.08	GTP-binding protein rho3	0	1	2	0	0.5	2	2	0	2	2
68013174	SPAC664.15	Thioredoxin reductase	0	1	7	0	0.142857	7	7	0	2	2
162312192	SPBC27B12.13	Probable mitochondrial import receptor subunit tom40	0	0	2	0	0	2	2	0	2	2
162312221	SPBC1A4.02c	3-isopropylmalate dehydrogenase	0	0	10	0	0	10	10	0	2	2
162312257	SPBC3E7.16c	2-isopropylmalate synthase	0	0	8	0	0	8	8	0	2	2
162312305	SPBC1604.21c	Ubiquitin-activating enzyme E1 1	0	6	20	0	0.3	20	3.33333	0	2	2
162312335	SPBC1289.16c	Putative primary amine oxidase 1	0	1	4	0	0.25	4	4	0	2	2
162312337	SPBP4G3.01	Putative inorganic phosphate transporter C8E4.01c	0	0	4	0	0	4	4	0	2	2
162312364	SPAC13C5.01c	Probable proteasome subunit alpha type-4	0	1	3	0	0.333333	3	3	0	2	2
162312376	SPAPJ696.03c	Uncharacterized peptidase C22G7.01c	0	0	4	0	0	4	4	0	2	2
162312440	SPAC15F9.03c	Nuclear transport factor 2	0	0	3	0	0	3	3	0	2	2
162312458	SPAC3F10.11c	ATP-binding cassette transporter abc2	0	0	2	0	0	2	2	0	2	2
162312486	SPAC3A11.12c	26S protease regulatory subunit 6A	0	1	2	0	0.5	2	2	0	2	2
162312494	SPAC1142.02c	Small glutamine-rich tetratricopeptide repeat-containing protein 2	0	0	6	0	0	6	6	0	2	2
162312536	SPAC25G10.09c	Actin cytoskeleton-regulatory complex protein pan1	0	0	9	0	0	9	9	0	2	2
162312558	SPAC20G4.01	Uncharacterized ABC transporter ATP-binding protein C20G4.01	0	0	2	0	0	2	2	0	2	2
162312568	SPAC26F1.14c	Putative flavoprotein C26F1.14C	0	1	5	0	0.2	5	5	0	2	2
197209718	SPBC460.02c		0	1	2	0	0.5	2	2	0	2	2
295442744	SPCC757.15		0	1	2	0	0.5	2	2	0	2	2
295442792	SPCC18.18c		0	3	6	0	0.5	6	2	0	2	2
295442811	SPBC354.07c		0	1	2	0	0.5	2	2	0	2	2
295442950	SPAC56F8.05c		0	0	5	0	0	5	5	0	2	2
295442952	SPAC4C5.01		0	0	2	0	0	2	2	0	2	2
295443078	SPAC890.07c		0	0	3	0	0	3	3	0	2	2
347834326	SPBC16H5.12c		0	2	4	0	0.5	4	2	0	2	2

## Sheet: TableS4 (read counts)
Read counts of short- and long-read sequencing data
RNA-seq dataset	# raw reads	# reads after quality filter	# mapped reads	Fraction mapped	# unmapped reads	# unmapped reads with >6 consecutive As
WT1-1_mRNA_caffeine	15958167	14944348	14803193	0.990555	141563	5596
WT1-1_mRNA_water	20537298	19358088	19191208	0.991379	167421	7164
WT1-1_nRNA_caffeine	11566915	11137302	10980643	0.985934	156659	61447
WT1-1_nRNA_water	12544813	12060839	11903670	0.986969	157169	43732
WT1-2_mRNA_caffeine	16781535	15788091	15629062	0.989927	159455	11554
WT1-2_mRNA_water	14358312	13420322	13274845	0.98916	145477	13175
WT1-2_nRNA_caffeine	13599699	13086301	12943385	0.989079	142916	40835
WT1-2_nRNA_water	11521595	11089042	10982725	0.990412	106317	33410
WT1-3_mRNA_caffeine	15163752	14360517	14232890	0.991113	128491	12491
WT1-3_mRNA_water	17233750	16184316	16017317	0.989681	167916	6476
WT1-3_nRNA_caffeine	12713146	12216473	12077231	0.988602	139242	44137
WT1-3_nRNA_water	14149089	13611430	13472446	0.989789	138984	42545
WT2-1_nRNA	13438766	12929550	12767234	0.987446	162316	63507
WT2-2_nRNA	14416873	13871132	13684347	0.986534	186785	74463
LRS sequencing dataset	# CCS reads	# CCS reads with 5' and 3' adapter (full-length)	Fraction full-length reads	Mapped LRS dataset	Mapped, high quality, non-polyadenylated reads	Fraction of full-length reads	Mapped, high quality, polyadenylated reads
WT30_1	281949	222315	0.788494	WT30_1	123756	0.55667	7037
WT30_2	94459	76599	0.810923	WT30_2	45318	0.591627	2497
WT_prp2-1_37	161492	97371	0.602946	WT37	32176	0.330447	1735
				prp2-1_37	33746	0.346571	2312

## Sheet: TableS5 (gene annotation)
chromosome	start	end	id.gene	strand	thick.start	thick.end	exon.number	exon.length	exon.start
AB325691	11640	13344	SPBC460.03.1	+	11640	13344	1	1704	0
AB325691	14072	15248	SPBC460.04c.1	-	14072	15248	1	1176	0
AB325691	1478	3197	SPBC460.01c.1	-	1478	3197	1	1719	0
AB325691	16469	18062	SPBC460.05.1	+	16469	18062	1	1593	0
AB325691	8855	9803	SPBC460.02c.1	-	8855	9803	2	510153	0,795
I	0	5662	SPAC212.11.1	-	0	5662	1	5662	0
I	1005498	1005710	SPNCRNA.164.1	+	1005498	1005710	1	212	0
I	1015474	1015830	SPNCRNA.220.1	+	1015474	1015830	1	356	0
I	1018732	1021093	SPNCRNA.704.1	+	1018732	1021093	1	2361	0
I	1025198	1025635	SPNCRNA.705.1	+	1025198	1025635	1	437	0
I	1028238	1030659	SPNCRNA.706.1	-	1028238	1030659	1	2421	0
I	1031903	1033018	SPNCRNA.707.1	-	1031903	1033018	1	1115	0
I	1032084	1034167	SPAC23C4.02.1	+	1032181	1034167	5	131,53,228,89,1402	0,173,274,543,681
I	1034295	1035992	SPAC23C4.03.1	+	1034295	1035762	1	1697	0
I	1036032	1036508	SPAC23C4.04c.1	+	1036032	1036508	2	311112	0,364
I	103940	104953	SPAC1F8.08.1	+	103940	104303	1	1013	0
I	1046858	1048934	SPNCRNA.708.1	-	1046858	1048934	1	2076	0
I	1052874	1054468	SPAC23C4.14.1	+	1052983	1054468	4	293433535123	0,369,845,1471
I	1054664	1055906	SPAC23C4.15.1	+	1054734	1055642	3	145,83,739	0,209,503
I	1057646	1058238	SPNCRNA.709.1	-	1057646	1058238	1	592	0
I	1063020	1063448	SPNCRNA.166.1	+	1063020	1063448	1	428	0
I	106892	108361	SPAC11D3.19.1	+	106964	107198	1	1469	0
I	1073170	1074075	SPAC1A6.11.1	+	1073533	1073854	1	905	0
I	1081801	1083525	SPNCRNA.710.1	+	1081801	1083525	1	1724	0
I	1081915	1083616	SPAC1A6.06c.1	-	1082782	1083391	2	1227423	0,1278
I	1086241	1087505	SPAC1A6.08c.1	-	1086375	1087233	1	1264	0
I	108731	109195	SPAC11D3.01c.1	-	108907	109147	1	464	0
I	1090677	1092303	SPAC1A6.10.1	+	1090677	1092135	1	1626	0
I	109627	112377	SPNCRNA.608.1	+	109627	112377	1	2750	0
I	1096368	1096466	SPATRNASER.01.1	+	1096368	1096466	1	98	0
I	1096473	1096545	SPATRNAMET.01.1	+	1096473	1096545	1	72	0
I	1097448	1099554	SPAC30D11.11.1	-	1098035	1099364	1	2106	0
I	109828	110455	SPAC11D3.02c.1	-	109828	110281	1	627	0
I	1099488	1101583	SPAC30D11.10.1	-	1100127	1101537	1	2095	0
I	1099990	1101663	SPNCRNA.711.1	+	1099990	1101663	1	1673	0
I	11026	11556	SPNCRNA.70.1	-	11026	11556	1	530	0
I	1106429	1107885	SPAC30D11.07.1	-	1106772	1107840	1	1456	0
I	110903	112499	SPAC11D3.03c.1	-	111004	111913	3	1143236122	0,1194,1474
I	1115898	1118412	SPAC30D11.03.1	-	1116056	1118412	3	3041211998	0,348,516
I	1118925	1119763	SPAC30D11.02c.1	+	1119377	1119763	2	695,15	0,823
I	1119879	1123773	SPAC30D11.01c.1	+	1120547	1123529	1	3894	0
I	1126900	1129344	SPNCRNA.713.1	-	1126900	1129344	1	2444	0
I	1129390	1129982	SPNCRNA.714.1	-	1129390	1129982	1	592	0
I	1133225	1134356	SPAC56F8.04c.1	-	1133225	1134356	2	1058,25	0,1106
I	1134588	1135838	SPNCRNA.715.1	+	1134588	1135838	1	1250	0
I	1138565	1139117	SPAC56F8.07.1	+	1138565	1139117	1	552	0
I	1139129	1140325	SPAC56F8.08.1	+	1139129	1140242	2	204878	0,318
I	1146832	1148085	SPAC56F8.12.1	+	1146832	1148017	1	1253	0
I	1151430	1153638	SPAC56F8.15.1	+	1152067	1152598	1	2208	0
I	1159625	1160000	SPAC22A12.02c.1	-	1159625	1160000	1	375	0
I	1165697	1166644	SPNCRNA.717.1	+	1165697	1166644	1	947	0
I	1166561	1169743	SPAC22A12.07c.1	-	1166821	1169503	1	3182	0
I	1170195	1172171	SPAC22A12.08c.1	-	1170195	1172126	5	266,767,495,57,173	0,308,1166,1704,1803
I	1172208	1176801	SPAC22A12.10.1	+	1174570	1175781	2	24992044	0,2549
I	1176702	1178897	SPAC22A12.11.1	+	1177064	1178807	1	2195	0
I	11783	12994	SPAC212.08c.1	+	12157	12994	1	1211	0
I	1181116	1182594	SPNCRNA.719.1	+	1181116	1182594	1	1478	0
I	1189966	1190942	SPNCRNA.168.1	+	1189966	1190942	1	976	0
I	1190108	1190905	SPNCRNA.720.1	-	1190108	1190905	1	797	0
I	1191106	1192276	SPNCRNA.721.1	+	1191106	1192276	1	1170	0
I	1195591	1195663	SPATRNAALA.02.1	-	1195591	1195663	1	72	0
I	1197062	1199912	SPNCRNA.722.1	-	1197062	1199912	1	2850	0
I	1200008	1200876	SPNCRNA.723.1	+	1200008	1200876	1	868	0
I	1200167	1200253	SPSNORNA.07.1	+	1200167	1200253	1	86	0
I	1200393	1200501	SPSNORNA.08.1	+	1200393	1200501	1	108	0
I	1200645	1200729	SPSNORNA.09.1	+	1200645	1200729	1	84	0
I	1218320	1218887	SPAC10F6.07c.1	-	1218320	1218887	1	567	0
I	1219251	1220071	SPNCRNA.554.1	+	1219251	1220071	1	820	0
I	1219666	1220847	SPAC10F6.08c.1	-	1219666	1220797	3	774,209,93	0,828,1088
I	1220910	1225530	SPNCRNA.725.1	+	1220910	1225530	1	4620	0
I	1232131	1233115	SPNCRNA.726.1	+	1232131	1233115	1	984	0
I	1234450	1234849	SPNCRNA.82.1	+	1234450	1234849	1	399	0
I	1234475	1235111	SPNCRNA.727.1	+	1234475	1235111	1	636	0
I	1234962	1235045	SPSNORNA.10.1	+	1234962	1235045	1	83	0
I	1235568	1238775	SPNCRNA.728.1	-	1235568	1238775	1	3207	0
I	1235600	1237035	SPAC10F6.15.1	+	1235666	1236965	1	1435	0
I	1236995	1238533	SPNCRNA.729.1	+	1236995	1238533	1	1538	0
I	1237145	1238641	SPNCRNA.432.1	+	1237145	1238641	1	1496	0
I	1238895	1240185	SPAC10F6.16.1	+	1238895	1239424	3	84,84,1013	0,129,277
I	1245715	1253559	SPAC56E4.04c.1	-	1246094	1253559	2	7092130	0,7714
I	124906	129053	SPAC11D3.10.1	+	125581	126886	1	4147	0
I	1263451	1265929	SPNCRNA.730.1	+	1263451	1265929	1	2478	0
I	1268171	1269878	SPNCRNA.731.1	+	1268171	1269878	1	1707	0
I	1280536	1281411	SPAPB17E12.09.1	+	1280700	1281358	2	524305	0,570
I	1289724	1290996	SPNCRNA.732.1	+	1289724	1290996	1	1272	0
I	1294071	1294990	SPNCRNA.733.1	-	1294071	1294990	1	919	0
I	1294305	1295341	SPAC1565.03.1	+	1294482	1294983	1	1036	0
I	130147	131268	SPAC11D3.13.1	+	130328	130997	1	1121	0
I	1305860	1306249	SPNCRNA.169.1	+	1305860	1306249	1	389	0
I	131202	135541	SPNCRNA.609.1	+	131202	135541	1	4339	0
I	1314923	1315020	SPATRNAPRO.02.1	-	1314923	1315020	1	97	0
I	1316007	1316643	SPAC6F12.04.1	+	1316098	1316497	1	636	0
I	1316807	1316891	SPSNORNA.53.1	+	1316807	1316891	1	84	0
I	1329090	1333409	SPAC6F12.10c.1	-	1329261	1333233	1	4319	0
I	1332336	1333254	SPNCRNA.734.1	+	1332336	1333254	1	918	0
I	1333346	1335669	SPAC6F12.11c.1	-	1333664	1335143	2	1575640	0,1683
I	1340219	1342448	SPAC6F12.14.1	+	1340399	1342427	3	314719866	0,606,1363
I	1343998	1345867	SPNCRNA.735.1	+	1343998	1345867	1	1869	0
I	135568	135926	SPNCRNA.147.1	+	135568	135926	1	358	0
I	1356929	1359496	SPNCRNA.736.1	-	1356929	1359496	1	2567	0
I	1357620	1359568	SPNCRNA.737.1	+	1357620	1359568	1	1948	0
I	1359978	1360931	SPNCRNA.738.1	-	1359978	1360931	1	953	0
I	136273	137355	SPNCRNA.610.1	-	136273	137355	1	1082	0
I	13664	14555	SPAC212.07c.1	+	13664	14555	1	891	0
I	1368511	1369068	SPNCRNA.739.1	-	1368511	1369068	1	557	0
I	1370155	1371501	SPAC57A10.04.1	+	1370178	1371276	2	2391044	0,302
I	1376586	1377072	SPAC57A10.06.1	+	1376586	1377072	2	361,41	0,445
I	1390636	1393081	SPAC20G8.02.1	+	1390636	1392910	1	2445	0
I	1418899	1420497	SPAC20G8.10c.1	-	1419072	1420467	1	1598	0
I	1421148	1421221	SPATRNACYS.01.1	+	1421148	1421221	1	73	0
I	1423028	1424169	SPAC3A12.03c.1	-	1423239	1424169	1	1141	0
I	1424696	1425562	SPAC3A12.04c.1	-	1424696	1425562	4	465,99,59,85	0,534,675,781
I	1430098	1432875	SPAC3A12.06c.1	-	1430423	1432655	1	2777	0
I	1432772	1433415	SPAC3A12.19.1	-	1433048	1433375	2	381217	0,426
I	1437857	1438678	SPNCRNA.741.1	-	1437857	1438678	1	821	0
I	144732	146501	SPNCRNA.611.1	+	144732	146501	1	1769	0
I	1449397	1449469	SPATRNAPRO.03.1	-	1449397	1449469	1	72	0
I	1451226	1451437	SPSNORNA.48.1	+	1451226	1451437	1	211	0
I	1465784	1469848	SPAC9.04.1	+	1465846	1469848	1	4064	0
I	146870	148041	SPNCRNA.612.1	-	146870	148041	1	1171	0
I	146973	148055	SPAC5H10.01.1	+	146973	147879	1	1082	0
I	1476730	1478449	SPNCRNA.742.1	+	1476730	1478449	1	1719	0
I	1481082	1482570	SPNCRNA.743.1	-	1481082	1482570	1	1488	0
I	1481490	1481827	SPNCRNA.171.1	+	1481490	1481827	1	337	0
I	148361	149005	SPNCRNA.613.1	+	148361	149005	1	644	0
I	1484978	1485061	SPATRNAMET.02.1	-	1484978	1485061	1	83	0
I	1494669	1495830	SPAC5D6.10c.1	+	1494669	1495077	1	1161	0
I	149657	149776	SPRRNA.10.1	+	149657	149776	1	119	0
I	1509573	1511606	SPAC5D6.02c.1	+	1510375	1511278	1	2033	0
I	1512456	1512674	SPNCRNA.173.1	+	1512456	1512674	1	218	0
I	1514941	1516959	SPAC57A7.12.1	-	1515088	1516914	2	1722171	0,1847
I	1526344	1527075	SPNCRNA.174.1	+	1526344	1527075	1	731	0
I	1527087	1527181	SPATRNALEU.01.1	-	1527087	1527181	1	94	0
I	152850	155515	SPAC5H10.04.1	+	153386	154535	1	2665	0
I	1533564	1534417	SPNCRNA.744.1	+	1533564	1534417	1	853	0
I	1534351	1541786	SPAC57A7.05.1	-	1534587	1538601	1	7435	0
I	1559880	1561967	SPNCRNA.555.1	+	1559880	1561967	1	2087	0
I	1563478	1563593	SPRRNA.53.1	+	1563478	1563593	1	115	0
I	1564100	1568523	SPAC167.08.1	-	1564215	1568217	1	4423	0
I	1572009	1572308	SPNCRNA.80.1	-	1572009	1572308	1	299	0
I	1572799	1573408	SPNCRNA.745.1	-	1572799	1573408	1	609	0
I	1573771	1574466	SPNCRNA.175.1	+	1573771	1574466	1	695	0
I	1574845	1575103	SPNCRNA.81.1	-	1574845	1575103	1	258	0
I	1576711	1578028	SPAC23H4.17c.1	+	1576853	1578028	2	1125127	0,1190
I	1578313	1579610	SPAC23H4.16c.1	+	1578313	1579540	4	132165192568	0,178,479,729
I	1579667	1582323	SPAC23H4.15.1	-	1579755	1582107	1	2656	0
I	1582411	1585637	SPAC23H4.14.1	-	1582524	1585443	5	186,2389,105,78,267	0,245,2680,2836,2959
I	15854	16226	SPAC212.12.1	+	15854	16226	1	372	0
I	1585741	1586534	SPAC23H4.21.1	-	1586012	1586473	2	355346	0,447
I	158776	159472	SPAC5H10.07.1	+	159202	159472	1	696	0
I	159879	160945	SPAC5H10.08c.1	-	160093	160945	1	1066	0
I	1599322	1600363	SPAC23H4.05c.1	+	1599330	1599624	1	1041	0
I	1600908	1601622	SPNCRNA.746.1	+	1600908	1601622	1	714	0
I	1603304	1603376	SPATRNATHR.01.1	-	1603304	1603376	1	72	0
I	1607901	1608831	SPNCRNA.747.1	-	1607901	1608831	1	930	0
I	160976	161822	SPAC5H10.09c.1	-	160976	161780	1	846	0
I	161071	162819	SPNCRNA.614.1	+	161071	162819	1	1748	0
I	1611334	1611958	SPNCRNA.748.1	-	1611334	1611958	1	624	0
I	1614240	1615625	SPAP27G11.04c.1	-	1614500	1615491	2	1096246	0,1139
I	1619482	1620433	SPAP27G11.06c.1	-	1619532	1620131	3	245131465	0,302,486
I	1620367	1621358	SPAP27G11.07c.1	-	1620497	1621262	2	241702	0,289
I	1620399	1621506	SPNCRNA.749.1	+	1620399	1621506	1	1107	0
I	1621638	1622867	SPAP27G11.08c.1	-	1621638	1622867	2	557622	0,607
I	162256	164455	SPNCRNA.615.1	-	162256	164455	1	2199	0
I	1630899	1631203	SPAP27G11.11c.1	-	1630899	1631203	2	199,23	0,281
I	1631128	1632401	SPNCRNA.750.1	-	1631128	1632401	1	1273	0
I	1631282	1631597	SPAP27G11.16.1	+	1631282	1631597	1	315	0
I	1632067	1634832	SPAP27G11.12.1	+	1632067	1634742	4	20,43,33,2388	0,99,294,377
I	164569	166335	SPAC5H10.11.1	+	164727	165717	1	1766	0
I	1646291	1646362	SPATRNAGLY.01.1	-	1646291	1646362	1	71	0
I	1646602	1647186	SPNCRNA.751.1	-	1646602	1647186	1	584	0
I	1651011	1652981	SPAC343.07.1	+	1651011	1652981	4	130157688855	0,173,377,1115
I	1654118	1656060	SPNCRNA.752.1	-	1654118	1656060	1	1942	0
I	1663694	1664423	SPNCRNA.753.1	-	1663694	1664423	1	729	0
I	1665143	1667735	SPAC343.21.1	+	1666786	1667263	1	2592	0
I	166582	167280	SPNCRNA.616.1	+	166582	167280	1	698	0
I	1667954	1669964	SPAC343.20.1	-	1669622	1669964	1	2010	0
I	1675729	1678118	SPAC343.16.1	+	1675729	1677895	1	2389	0
I	1680204	1681471	SPAC343.18.1	+	1680413	1681084	2	231983	0,284
I	1686075	1686662	SPNCRNA.754.1	-	1686075	1686662	1	587	0
I	1690121	1691922	SPNCRNA.755.1	-	1690121	1691922	1	1801	0
I	1701859	1702271	SPNCRNA.177.1	+	1701859	1702271	1	412	0
I	170236	174473	SPNCRNA.617.1	+	170236	174473	1	4237	0
I	1704581	1704664	SPATRNALYS.01.1	+	1704581	1704664	1	83	0
I	170708	170856	SPSNORNA.49.1	+	170708	170856	1	148	0
I	1712783	1713921	SPAC664.06.1	+	1712816	1713783	2	156765	0,373
I	1712995	1713071	SPSNORNA.31.1	+	1712995	1713071	1	76	0
I	1725051	1725780	SPNCRNA.757.1	-	1725051	1725780	1	729	0
I	1729504	1729858	SPAC664.13.1	+	1729504	1729858	1	354	0
I	1731082	1733268	SPAC664.14.1	+	1731626	1733165	1	2186	0
I	1731717	1733316	SPNCRNA.758.1	-	1731717	1733316	1	1599	0
I	1733763	1733838	SPATRNALYS.02.1	-	1733763	1733838	1	75	0
I	1746463	1746547	SPATRNATYR.01.1	+	1746463	1746547	1	84	0
I	1751075	1753681	SPAC17A5.18c.1	-	1753206	1753659	1	2606	0
I	1753773	1755715	SPAC17A5.02c.1	-	1754032	1755638	5	372125769122385	0,412,576,1390,1557
I	1754923	1755748	SPNCRNA.759.1	+	1754923	1755748	1	825	0
I	1757449	1759202	SPAC17A5.04c.1	-	1757592	1759202	2	736946	0,807
I	175922	176736	SPNCRNA.141.1	+	175922	176736	1	814	0
I	1759483	1760333	SPNCRNA.556.1	+	1759483	1760333	1	850	0
I	1759627	1760371	SPAC17A5.05c.1	-	1759627	1760371	1	744	0
I	1760783	1761455	SPAC17A5.19.1	+	1761132	1761455	2	448180	0,492
I	1761551	1764319	SPAC17A5.06.1	+	1761786	1764201	1	2768	0
I	1772295	1772369	SPATRNAILE.01.1	+	1772295	1772369	1	74	0
I	1772500	1774232	SPNCRNA.760.1	-	1772500	1774232	1	1732	0
I	1772924	1774203	SPAC17A5.11.1	+	1772924	1774203	5	281,109,78,129,441	0,339,498,640,838
I	1774257	1776351	SPAC17A5.12.1	+	1774257	1776351	1	2094	0
I	1774295	1776403	SPNCRNA.761.1	-	1774295	1776403	1	2108	0
I	1776499	1777371	SPAC17A5.13.1	+	1776499	1777371	3	109296303	0,162,569
I	1792432	1794994	SPAC1610.03c.1	-	1792592	1794972	4	1519475178143	0,1590,2156,2419
I	1798346	1799015	SPAC1002.01.1	+	1798346	1799015	2	484,56	0,613
I	1799060	1800053	SPAC1002.02.1	+	1799127	1799817	1	993	0
I	18041	18974	SPAC212.06c.1	+	18071	18557	2	265626	0,307
I	1804547	1806797	SPAC1002.05c.1	-	1804649	1806797	1	2250	0
I	1807269	1807781	SPAC1002.06c.1	-	1807269	1807781	3	133,160,64	0,213,448
I	1813438	1815920	SPNCRNA.763.1	+	1813438	1815920	1	2482	0
I	1823881	1824630	SPAC1002.20.1	+	1823971	1824277	1	749	0
I	1827611	1829708	SPAC1002.16c.1	-	1827870	1829370	1	2097	0
I	1838514	1840293	SPAC1399.05c.1	+	1838586	1840293	2	3381324	0,455
I	1838821	1840290	SPNCRNA.764.1	-	1838821	1840290	1	1469	0
I	1840620	1841283	SPAC1399.04c.1	+	1840620	1841283	1	663	0
I	1844129	1845339	SPNCRNA.178.1	+	1844129	1845339	1	1210	0
I	1848337	1850881	SPAC1399.06.1	-	1849983	1850358	1	2544	0
I	1856832	1860727	SPAP11E10.02c.1	-	1856892	1860141	1	3895	0
I	1861145	1861484	SPNCRNA.181.1	+	1861145	1861484	1	339	0
I	1863362	1863762	SPAPB1A10.03.1	+	1863362	1863762	2	19329	0,71
I	1863971	1864457	SPAPB1A10.16.1	+	1863971	1864457	2	389,43	0,443
I	1865790	1866964	SPNCRNA.765.1	-	1865790	1866964	1	1174	0
I	1874205	1875627	SPNCRNA.766.1	+	1874205	1875627	1	1422	0
I	1874244	1875080	SPNCRNA.767.1	-	1874244	1875080	1	836	0
I	1875084	1875651	SPNCRNA.768.1	-	1875084	1875651	1	567	0
I	187700	190031	SPAC13G6.08.1	+	188376	189984	1	2331	0
I	1886751	1888797	SPNCRNA.769.1	-	1886751	1888797	1	2046	0
I	1890528	1892090	SPAPB1A10.14.1	+	1890919	1891651	1	1562	0
I	1897288	1898926	SPNCRNA.770.1	-	1897288	1898926	1	1638	0
I	1899820	1901995	SPNCRNA.771.1	-	1899820	1901995	1	2175	0
I	1901611	1901982	SPNCRNA.182.1	+	1901611	1901982	1	371	0
I	1902261	1904259	SPNCRNA.772.1	-	1902261	1904259	1	1998	0
I	1902619	1904134	SPNCRNA.557.1	-	1902619	1904134	1	1515	0
I	1904195	1906153	SPAC110.05.1	-	1905727	1905820	2	2601655	0,303
I	1905754	1911747	SPAC110.01.1	+	1908267	1911339	1	5993	0
I	1913839	1915898	SPNCRNA.773.1	-	1913839	1915898	1	2059	0
I	1920875	1921644	SPNCRNA.774.1	+	1920875	1921644	1	769	0
I	1926603	1927914	SPAP14E8.04.1	+	1926738	1927752	1	1311	0
I	1938278	1940537	SPAC3H1.05.1	+	1938899	1940394	2	7261463	0,796
I	194098	195626	SPAC13G6.11c.1	-	194118	195582	2	1160119	0,1409
I	1943704	1943994	SPNCRNA.775.1	+	1943704	1943994	1	290	0
I	1945458	1946363	SPNCRNA.776.1	+	1945458	1946363	1	905	0
I	1951104	1953595	SPNCRNA.777.1	-	1951104	1953595	1	2491	0
I	1952383	1953655	SPNCRNA.778.1	+	1952383	1953655	1	1272	0
I	1953734	1954811	SPNCRNA.779.1	+	1953734	1954811	1	1077	0
I	1953759	1954186	SPNCRNA.780.1	-	1953759	1954186	1	427	0
I	1954819	1956332	SPNCRNA.781.1	+	1954819	1956332	1	1513	0
I	1956475	1957899	SPNCRNA.783.1	-	1956475	1957899	1	1424	0
I	1956500	1956988	SPNCRNA.784.1	+	1956500	1956988	1	488	0
I	1968433	1969093	SPAC9G1.14.1	-	1968800	1969046	1	660	0
I	1983122	1985685	SPAC9G1.08c.1	-	1984567	1985293	1	2563	0
I	1985349	1985545	SPAC9G1.15c.1	-	1985349	1985544	1	196	0
I	1985661	1991234	SPAC9G1.09.1	+	1985756	1987228	2	2125305	0,268
I	198883	199231	SPAC13G6.13.1	+	198883	199231	1	348	0
I	1995129	1996858	SPAC9G1.13c.1	-	1995207	1996683	4	1019,78,89,381	0,1061,1195,1348
I	1996773	1999613	SPAC767.01c.1	-	1997254	1999342	2	2425364	0,2476
I	199873	200587	SPNCRNA.620.1	-	199873	200587	1	714	0
I	1999134	2000466	SPNCRNA.785.1	+	1999134	2000466	1	1332	0
I	1999963	2000691	SPNCRNA.786.1	-	1999963	2000691	1	728	0
I	2000655	2004811	SPAC17H9.01.1	+	2000984	2004593	1	4156	0
I	2004744	2008108	SPAC17H9.02.1	+	2004837	2007930	1	3364	0
I	2012667	2013458	SPNCRNA.787.1	-	2012667	2013458	1	791	0
I	2026715	2027164	SPNCRNA.788.1	+	2026715	2027164	1	449	0
I	2030501	2030865	SPNCRNA.184.1	+	2030501	2030865	1	364	0
I	2032008	2033308	SPAC17H9.17c.1	-	2032008	2033228	3	621395177	0,679,1123
I	2033637	2033955	SPAC17H9.18c.1	-	2033637	2033955	1	318	0
I	203596	204322	SPNCRNA.621.1	-	203596	204322	1	726	0
I	2036326	2040544	SPAC17H9.20.1	+	2036402	2039520	6	341,113,96,410,1600,1429	0,386,537,681,1141,2789
I	2041680	2041861	SPNCRNA.185.1	+	2041680	2041861	1	181	0
I	2042355	2043361	SPNCRNA.789.1	-	2042355	2043361	1	1006	0
I	2047358	2048308	SPAC607.07c.1	-	2047698	2048130	1	950	0
I	2048420	2050160	SPAC607.08c.1	-	2048420	2050160	1	1740	0
I	2050461	2051731	SPAC607.09c.1	-	2050461	2051652	1	1270	0
I	2052798	2057177	SPAC607.10.1	+	2053944	2057031	1	4379	0
I	2055971	2056968	SPNCRNA.790.1	-	2055971	2056968	1	997	0
I	2064852	2066004	SPAC3C7.02c.1	-	2064852	2066004	1	1152	0
I	2066216	2067343	SPNCRNA.791.1	+	2066216	2067343	1	1127	0
I	2066441	2067904	SPAC3C7.03c.1	-	2066667	2067764	2	1263156	0,1307
I	206774	209401	SPNCRNA.622.1	+	206774	209401	1	2627	0
I	20823	21015	SPAC212.05c.1	+	20823	21015	1	192	0
I	2083406	2084941	SPAC3C7.09.1	+	2083518	2084808	1	1535	0
I	2093220	2093941	SPNCRNA.792.1	-	2093220	2093941	1	721	0
I	2093397	2095721	SPNCRNA.793.1	+	2093397	2095721	1	2324	0
I	2094998	2095865	SPNCRNA.794.1	-	2094998	2095865	1	867	0
I	2111392	2113866	SPAC20H4.01.1	+	2111432	2113433	1	2474	0
I	2112070	2114599	SPNCRNA.795.1	-	2112070	2114599	1	2529	0
I	2113810	2114930	SPAC20H4.02.1	+	2114010	2114763	1	1120	0
I	2120429	2122465	SPAC20H4.06c.1	-	2120603	2122208	1	2036	0
I	2123295	2125833	SPNCRNA.796.1	-	2123295	2125833	1	2538	0
I	2126066	2128359	SPAC20H4.09.1	+	2126066	2128359	9	91,78,65,257,772,102,169,321,89	0,134,260,373,666,1484,1634,1845,2204
I	2128432	2131713	SPAC20H4.10.1	+	2128462	2131623	4	487442197164	0,90,880,3117
I	213526	215928	SPNCRNA.623.1	-	213526	215928	1	2402	0
I	2136033	2139523	SPAC23C11.04c.1	-	2138063	2139438	4	2177143396626	0,2233,2415,2864
I	21380	23050	SPAC212.04c.1	+	21586	22508	2	696919	0,751
I	213840	214818	SPNCRNA.142.1	+	213840	214818	1	978	0
I	2144893	2145226	SPAC23C11.07.1	+	2144893	2145226	1	333	0
I	2146729	2148425	SPNCRNA.799.1	-	2146729	2148425	1	1696	0
I	2147099	2150190	SPAC23C11.09.1	+	2147201	2150081	1	3091	0
I	2150623	2151601	SPAC23C11.10.1	+	2150623	2151601	5	121,99,199,163,216	0,160,306,556,762
I	2152041	2154223	SPAC23C11.11.1	+	2152153	2153524	5	158281313302756	0,218,657,1031,1426
I	2157793	2158195	SPNCRNA.187.1	+	2157793	2158195	1	402	0
I	2164161	2166765	SPAC23C11.16.1	+	2164239	2166291	1	2604	0
I	2167169	2168987	SPAC23C11.17.1	+	2167169	2168683	2	761686	0,132
I	2176802	2179225	SPNCRNA.801.1	+	2176802	2179225	1	2423	0
I	2184494	2185764	SPNCRNA.802.1	+	2184494	2185764	1	1270	0
I	2184653	2185990	SPAC13F5.07c.1	-	2184864	2185551	2	629519	0,818
I	2196439	2199126	SPNCRNA.803.1	-	2196439	2199126	1	2687	0
I	2199427	2200071	SPNCRNA.804.1	+	2199427	2200071	1	644	0
I	2214732	2214814	SPATRNAVAL.03.1	-	2214732	2214814	1	82	0
I	2215707	2216376	SPNCRNA.805.1	-	2215707	2216376	1	669	0
I	2228048	2228781	SPNCRNA.188.1	+	2228048	2228781	1	733	0
I	2240684	2241430	SPNCRNA.806.1	-	2240684	2241430	1	746	0
I	2245496	2247128	SPAC13D6.01.1	+	2245785	2247081	1	1632	0
I	2245512	2247257	SPNCRNA.807.1	-	2245512	2247257	1	1745	0
I	2248602	2249009	SPNCRNA.189.1	+	2248602	2249009	1	407	0
I	2249179	2249250	SPATRNAGLY.02.1	-	2249179	2249250	1	71	0
I	2259352	2262602	SPAC4G9.05.1	+	2259942	2261801	4	22010865341248	0,269,1426,2002
I	2262788	2265404	SPAC4G9.07.1	+	2263666	2265208	1	2616	0
I	2265548	2265838	SPNCRNA.808.1	-	2265548	2265838	1	290	0
I	2265687	2265845	SPNCRNA.507.1	-	2265687	2265845	1	158	0
I	2285749	2286566	SPNCRNA.809.1	+	2285749	2286566	1	817	0
I	2290390	2291538	SPNCRNA.810.1	-	2290390	2291538	1	1148	0
I	229269	230855	SPNCRNA.624.1	-	229269	230855	1	1586	0
I	2297819	2298939	SPNCRNA.811.1	+	2297819	2298939	1	1120	0
I	2303556	2304248	SPNCRNA.190.1	+	2303556	2304248	1	692	0
I	230544	231136	SPAC24B11.14.1	+	230544	231136	3	137,57,307	0,198,285
I	2313644	2315160	SPAC13G7.10.1	+	2313745	2315063	3	317,83,971	0,404,545
I	2315094	2316369	SPAC13G7.11.1	+	2315186	2316133	3	255214669	0,291,606
I	2318491	2322664	SPAC13G7.13c.1	-	2318637	2320239	1	4173	0
I	2322852	2325632	SPNCRNA.812.1	+	2322852	2325632	1	2780	0
I	2325853	2327280	SPNCRNA.813.1	+	2325853	2327280	1	1427	0
I	2326199	2328187	SPAC6C3.03c.1	-	2326331	2326634	2	1299638	0,1350
I	2327257	2327629	SPNCRNA.57.1	-	2327257	2327629	2	241,80	0,292
I	2330170	2330657	SPNCRNA.814.1	-	2330170	2330657	1	487	0
I	2330436	2330647	SPSNORNA.50.1	-	2330436	2330647	1	211	0
I	2330832	2332240	SPAC6C3.05.1	+	2331154	2331964	1	1408	0
I	2336033	2337768	SPAC6C3.07.1	+	2336033	2337581	1	1735	0
I	2344300	2345602	SPNCRNA.816.1	-	2344300	2345602	1	1302	0
I	235279	237141	SPNCRNA.625.1	+	235279	237141	1	1862	0
I	23588	24054	SPAC212.03.1	-	23588	23978	1	466	0
I	236818	236928	SPNCRNA.143.1	+	236818	236928	1	110	0
I	2369679	2370799	SPNCRNA.818.1	+	2369679	2370799	1	1120	0
I	237022	237885	SPAC806.11.1	-	237211	237430	1	863	0
I	2370709	2371361	SPNCRNA.192.1	+	2370709	2371361	1	652	0
I	237073	237848	SPNCRNA.03.1	-	237073	237848	1	775	0
I	2370922	2371545	SPNCRNA.819.1	-	2370922	2371545	1	623	0
I	2375518	2376190	SPNCRNA.820.1	+	2375518	2376190	1	672	0
I	237819	239427	SPNCRNA.626.1	-	237819	239427	1	1608	0
I	237902	238881	SPNCRNA.627.1	+	237902	238881	1	979	0
I	2380415	2381234	SPNCRNA.821.1	-	2380415	2381234	1	819	0
I	2381319	2381601	SPAC22H10.06c.1	-	2381319	2381601	1	282	0
I	238508	238898	SPNCRNA.144.1	+	238508	238898	1	390	0
I	2385702	2387654	SPAC22H10.08.1	+	2385906	2387441	2	1563333	0,1619
I	2387587	2389909	SPAC22H10.09.1	+	2387732	2389673	1	2322	0
I	2389916	2391943	SPAC22H10.10.1	+	2390085	2391790	5	324269100276889	0,362,673,819,1138
I	238997	240617	SPNCRNA.628.1	+	238997	240617	1	1620	0
I	2397247	2398350	SPAC15F9.01c.1	-	2397449	2398188	2	576472	0,631
I	239729	240571	SPNCRNA.145.1	+	239729	240571	1	842	0
I	2399477	2399860	SPNCRNA.822.1	-	2399477	2399860	1	383	0
I	2404748	2405441	SPNCRNA.823.1	+	2404748	2405441	1	693	0
I	2414050	2415271	SPAC6B12.03c.1	-	2414228	2415137	1	1221	0
I	2416875	2418250	SPNCRNA.824.1	+	2416875	2418250	1	1375	0
I	2424734	2425515	SPNCRNA.194.1	+	2424734	2425515	1	781	0
I	2424793	2425918	SPNCRNA.825.1	-	2424793	2425918	1	1125	0
I	2425756	2427967	SPAC6B12.08.1	+	2426190	2427467	2	5231554	0,657
I	2427901	2429090	SPAC6B12.09.1	+	2428019	2428934	1	1189	0
I	2432339	2432921	SPNCRNA.43.1	-	2432339	2432921	1	582	0
I	2433047	2433119	SPATRNATHR.02.1	+	2433047	2433119	1	72	0
I	2438819	2439389	SPNCRNA.195.1	+	2438819	2439389	1	570	0
I	2439436	2441027	SPAC6B12.15.1	+	2439531	2440926	3	221399521	0,418,1070
I	2440335	2440418	SPSNORNA.11.1	+	2440335	2440418	1	83	0
I	2440465	2441409	SPNCRNA.826.1	-	2440465	2441409	1	944	0
I	2441962	2442037	SPATRNALYS.03.1	+	2441962	2442037	1	75	0
I	2442588	2443829	SPAC6B12.16.1	+	2442688	2443829	2	1046,89	0,1152
I	2442699	2443956	SPNCRNA.827.1	-	2442699	2443956	1	1257	0
I	2443889	2445040	SPAC32A11.04c.1	-	2443985	2445031	2	1032,39	0,1112
I	2445219	2447714	SPAC32A11.01.1	+	2445279	2447585	3	1934961663	0,253,832
I	2450313	2451737	SPNCRNA.828.1	+	2450313	2451737	1	1424	0
I	2459474	2462176	SPNCRNA.829.1	+	2459474	2462176	1	2702	0
I	2461150	2462268	SPAC19A8.13.1	-	2461348	2462134	1	1118	0
I	2462201	2465087	SPAC19A8.12.1	-	2462725	2464951	1	2886	0
I	2472432	2472961	SPAC19A8.16.1	-	2472593	2472902	2	317101	0,428
I	2474083	2474170	SPNCRNA.286.1	+	2474083	2474170	1	87	0
I	2475939	2477174	SPAC19A8.06.1	-	2475965	2477159	1	1235	0
I	247719	248448	SPNCRNA.629.1	-	247719	248448	1	729	0
I	2480064	2482210	SPAC19A8.04.1	-	2480146	2482110	2	1581233	0,1913
I	2482407	2484948	SPAC19A8.03.1	-	2482965	2484746	3	1638576226	0,1683,2315
I	2495901	2496323	SPNCRNA.558.1	+	2495901	2496323	1	422	0
I	2498054	2498934	SPNCRNA.830.1	-	2498054	2498934	1	880	0
I	2510537	2510610	SPATRNACYS.02.1	+	2510537	2510610	1	73	0
I	2512904	2514941	SPAC23H3.11c.1	-	2512959	2514849	1	2037	0
I	2519009	2521358	SPNCRNA.197.1	+	2519009	2521358	1	2349	0
I	2519374	2521586	SPNCRNA.831.1	+	2519374	2521586	1	2212	0
I	2523433	2525232	SPNCRNA.832.1	+	2523433	2525232	1	1799	0
I	2527827	2529986	SPNCRNA.833.1	-	2527827	2529986	1	2159	0
I	2528029	2528644	SPAC25H1.03.1	+	2528037	2528644	2	72491	0,124
I	2529084	2529901	SPAC25H1.04.1	+	2529084	2529819	1	817	0
I	2530095	2531201	SPAC25H1.05.1	+	2530137	2530791	1	1106	0
I	253718	255964	SPNCRNA.630.1	+	253718	255964	1	2246	0
I	2538101	2540081	SPAC25H1.09.1	+	2538460	2540002	1	1980	0
I	2542865	2544911	SPNCRNA.834.1	+	2542865	2544911	1	2046	0
I	2547092	2547449	SPNCRNA.835.1	+	2547092	2547449	1	357	0
I	2547382	2552168	SPNCRNA.836.1	+	2547382	2552168	1	4786	0
I	2553839	2555738	SPNCRNA.837.1	+	2553839	2555738	1	1899	0
I	2558541	2561108	SPNCRNA.838.1	+	2558541	2561108	1	2567	0
I	256085	257001	SPNCRNA.631.1	+	256085	257001	1	916	0
I	2562275	2562427	SPSNRNA.06.1	-	2562275	2562427	2	48,54	0,98
I	2564427	2566667	SPNCRNA.839.1	-	2564427	2566667	1	2240	0
I	2573159	2574641	SPAC4A8.12c.1	-	2573419	2574473	2	1136291	0,1191
I	2574745	2575956	SPAC4A8.13c.1	-	2575105	2575924	1	1211	0
I	2578425	2578524	SPATRNAILE.02.1	+	2578425	2578524	1	99	0
I	2578955	2579514	SPAC4A8.15c.1	-	2578989	2579478	3	72,333,49	0,128,510
I	2580099	2583046	SPAC4A8.16c.1	-	2580219	2582976	1	2947	0
I	2583530	2585065	SPNCRNA.840.1	-	2583530	2585065	1	1535	0
I	2583862	2584233	SPAC823.17.1	+	2583862	2584047	2	40293	0,78
I	2590237	2590780	SPAC823.06.1	+	2590312	2590780	1	543	0
I	2591412	2592545	SPAC823.07.1	+	2591412	2592408	1	1133	0
I	2597442	2597985	SPNCRNA.199.1	+	2597442	2597985	1	543	0
I	2617855	2620433	SPAC7D4.11c.1	+	2617974	2620284	1	2578	0
I	2620294	2622315	SPAC7D4.10.1	-	2620294	2622195	6	25,945,64,103,189,147	0,280,1367,1481,1637,1874
I	2621696	2622420	SPNCRNA.842.1	+	2621696	2622420	1	724	0
I	2622359	2623585	SPAC7D4.09c.1	+	2622665	2623490	2	611114	0,112
I	2624050	2625332	SPAC7D4.08.1	-	2625041	2625332	1	1282	0
I	2627987	2628071	SPSNORNA.12.1	-	2627987	2628071	1	84	0
I	2644410	2645335	SPNCRNA.843.1	-	2644410	2645335	1	925	0
I	2660765	2661423	SPNCRNA.326.1	+	2660765	2661423	1	658	0
I	2662987	2665035	SPAC4F8.08.1	-	2664523	2664979	1	2048	0
I	2663414	2664052	SPNCRNA.200.1	+	2663414	2664052	1	638	0
I	266550	267792	SPNCRNA.632.1	-	266550	267792	1	1242	0
I	2667489	2667719	SPNCRNA.201.1	+	2667489	2667719	1	230	0
I	2682537	2684586	SPNCRNA.844.1	+	2682537	2684586	1	2049	0
I	2684682	2684765	SPATRNALYS.04.1	-	2684682	2684765	2	36,39	0,44
I	2694346	2694522	SPNCRNA.202.1	+	2694346	2694522	1	176	0
I	2703964	2704030	SPNCRNA.198.1	+	2703964	2704030	1	66	0
I	2705949	2706037	SPSNORNA.54.1	+	2705949	2706037	1	88	0
I	2707387	2707925	SPNCRNA.845.1	+	2707387	2707925	1	538	0
I	271076	272457	SPNCRNA.633.1	+	271076	272457	1	1381	0
I	272538	274901	SPNCRNA.634.1	-	272538	274901	1	2363	0
I	2725989	2732444	SPAC6F6.01.1	+	2726718	2732283	1	6455	0
I	2726057	2726682	SPNCRNA.204.1	+	2726057	2726682	1	625	0
I	273151	274921	SPAC1F5.09c.1	+	273151	274921	1	1770	0
I	2734030	2736306	SPAC6F6.03c.1	-	2734108	2736126	2	897975	0,1301
I	2735047	2735175	SPNCRNA.499.1	-	2735047	2735175	1	128	0
I	27352	27763	SPAC212.02.1	-	27352	27763	1	411	0
I	2736503	2739280	SPAC6F6.04c.1	-	2736675	2738145	1	2777	0
I	2738025	2740228	SPNCRNA.848.1	+	2738025	2740228	1	2203	0
I	2738680	2740459	SPNCRNA.205.1	+	2738680	2740459	1	1779	0
I	2745871	2746733	SPAC6F6.07c.1	-	2745954	2746640	4	257,47,33,295	0,321,431,567
I	2746666	2748180	SPAC6F6.08c.1	-	2746771	2748009	4	265,148,91,672	0,452,674,842
I	275088	276661	SPAC1F5.08c.1	+	275088	276549	1	1573	0
I	2752632	2754327	SPNCRNA.849.1	+	2752632	2754327	1	1695	0
I	2754842	2755977	SPNCRNA.850.1	-	2754842	2755977	1	1135	0
I	2758790	2760056	SPNCRNA.851.1	+	2758790	2760056	1	1266	0
I	2769227	2770625	SPNCRNA.852.1	-	2769227	2770625	1	1398	0
I	2770614	2773500	SPAC1805.01c.1	-	2770703	2773213	4	281,2077,49,297	0,321,2493,2589
I	2783546	2785086	SPAC1805.06c.1	-	2783940	2784930	1	1540	0
I	2784604	2785492	SPNCRNA.853.1	+	2784604	2785492	1	888	0
I	2785158	2786344	SPAC1805.07c.1	-	2785535	2786148	2	526332	0,854
I	2787207	2788035	SPNCRNA.854.1	-	2787207	2788035	1	828	0
I	2789089	2789377	SPAC1805.18.1	+	2789089	2789377	1	288	0
I	2789708	2789981	SPSNORNA.52.1	+	2789708	2789981	1	273	0
I	2790111	2791285	SPAC1805.09c.1	-	2790198	2791221	1	1174	0
I	2792838	2793544	SPAC1805.11c.1	-	2793016	2793476	2	414192	0,514
I	2794056	2794801	SPAC1805.12c.1	-	2794337	2794724	1	745	0
I	2802513	2802681	SPNCRNA.208.1	+	2802513	2802681	1	168	0
I	2802760	2802858	SPATRNALEU.02.1	-	2802760	2802858	1	98	0
I	2810264	2812517	SPAC1B2.03c.1	-	2811437	2812485	2	2104106	0,2147
I	2825582	2827013	SPAC3F10.05c.1	-	2825837	2826818	1	1431	0
I	2827046	2828687	SPAC3F10.06c.1	-	2827046	2828687	2	1303,59	0,1582
I	2828665	2829184	SPAC3F10.07c.1	-	2828665	2829184	1	519	0
I	2829718	2830254	SPNCRNA.855.1	-	2829718	2830254	1	536	0
I	2833230	2836168	SPAC3F10.10c.1	-	2833890	2834988	2	2837,51	0,2887
I	2844673	2844745	SPATRNATHR.03.1	-	2844673	2844745	1	72	0
I	2859019	2859417	SPNCRNA.856.1	-	2859019	2859417	1	398	0
I	2860848	2861815	SPAC8F11.05c.1	-	2860951	2861740	2	506398	0,569
I	28737	29657	SPAC212.01c.1	+	28737	29638	2	490372	0,548
I	2874955	2877487	SPACUNK4.19.1	+	2875887	2876217	1	2532	0
I	2885221	2886782	SPACUNK4.13c.1	+	2885341	2886721	3	305,41,1059	0,370,502
I	2885669	2886792	SPNCRNA.56.1	-	2885669	2886792	2	1114,2	0,1121
I	2886959	2890095	SPACUNK4.12c.1	+	2887038	2889948	1	3136	0
I	2890094	2890887	SPACUNK4.11c.1	+	2890157	2890779	2	90648	0,145
I	2891048	2892803	SPACUNK4.10.1	-	2891215	2892527	3	210866372	0,261,1383
I	2893835	2894991	SPACUNK4.09.1	-	2893971	2894991	1	1156	0
I	2893867	2895019	SPNCRNA.559.1	+	2893867	2895019	1	1152	0
I	2893894	2895984	SPNCRNA.858.1	+	2893894	2895984	1	2090	0
I	2895097	2898012	SPACUNK4.08.1	-	2895218	2897600	1	2915	0
I	2910332	2910975	SPNCRNA.209.1	+	2910332	2910975	1	643	0
I	2912761	2913270	SPAC513.03.1	-	2913007	2913184	2	259208	0,301
I	2913402	2913705	SPAC513.04.1	+	2913402	2913705	1	303	0
I	2924691	2927075	SPAC2E1P3.02c.1	-	2924892	2926446	1	2384	0
I	2924744	2926536	SPNCRNA.859.1	+	2924744	2926536	1	1792	0
I	2927203	2931205	SPAC2E1P3.03c.1	-	2927203	2931205	1	4002	0
I	2931621	2932800	SPNCRNA.860.1	-	2931621	2932800	1	1179	0
I	2931804	2932279	SPNCRNA.528.1	-	2931804	2932279	1	475	0
I	2937951	2939052	SPNCRNA.861.1	-	2937951	2939052	1	1101	0
I	2938120	2939967	SPNCRNA.862.1	+	2938120	2939967	1	1847	0
I	294009	294228	SPNCRNA.148.1	+	294009	294228	1	219	0
I	2953727	2954932	SPAPB24D3.04c.1	-	2954137	2954824	1	1205	0
I	2954211	2955627	SPNCRNA.864.1	+	2954211	2955627	1	1416	0
I	2954982	2955350	SPAPB24D3.05c.1	-	2954982	2955350	1	368	0
I	2956804	2959658	SPNCRNA.865.1	+	2956804	2959658	1	2854	0
I	2959155	2959658	SPNCRNA.210.1	+	2959155	2959658	1	503	0
I	2973016	2976287	SPNCRNA.867.1	+	2973016	2976287	1	3271	0
I	29763	31069	SPAC977.01.1	+	29765	30716	1	1306	0
I	2976789	2976979	SPRRNA.13.1	+	2976789	2976979	1	190	0
I	2977509	2979357	SPNCRNA.868.1	-	2977509	2979357	1	1848	0
I	2979598	2980606	SPNCRNA.869.1	-	2979598	2980606	1	1008	0
I	2980427	2981839	SPAPB1A11.02.1	+	2980472	2981589	2	1051210	0,202
I	2984438	2986118	SPAPB1A11.03.1	+	2984785	2986009	1	1680	0
I	2992358	2994428	SPNCRNA.870.1	-	2992358	2994428	1	2070	0
I	299463	299610	SPNCRNA.27.1	+	299463	299610	1	147	0
I	2996303	2997058	SPAC31G5.06.1	+	2996303	2997058	2	100605	0,150
I	2996867	2998123	SPNCRNA.871.1	-	2996867	2998123	1	1256	0
I	3001749	3004335	SPNCRNA.872.1	-	3001749	3004335	1	2586	0
I	3001760	3001930	SPNCRNA.71.1	+	3001760	3001930	1	170	0
I	3001824	3003103	SPNCRNA.72.1	-	3001824	3003103	1	1279	0
I	3002056	3003766	SPAC31G5.10.1	+	3002056	3003766	1	1710	0
I	3002833	3003255	SPNCRNA.73.1	-	3002833	3003255	1	422	0
I	3002975	3003758	SPNCRNA.74.1	-	3002975	3003758	1	783	0
I	3003815	3004916	SPNCRNA.01.1	+	3003815	3004916	1	1101	0
I	3004283	3005011	SPNCRNA.873.1	-	3004283	3005011	1	728	0
I	3006137	3006845	SPAC31G5.11.1	+	3006137	3006845	1	708	0
I	3009987	3010684	SPAC31G5.21.1	+	3010086	3010443	1	697	0
I	3009999	3010531	SPNCRNA.874.1	-	3009999	3010531	1	532	0
I	3010631	3012307	SPAC31G5.13.1	+	3010978	3011905	1	1676	0
I	3012250	3014213	SPAC31G5.14.1	+	3012592	3013756	1	1963	0
I	3012485	3013674	SPNCRNA.875.1	-	3012485	3013674	1	1189	0
I	3030454	3032492	SPNCRNA.876.1	-	3030454	3032492	1	2038	0
I	3032578	3033397	SPNCRNA.877.1	-	3032578	3033397	1	819	0
I	3033455	3033916	SPAC1786.04.1	-	3033580	3033916	1	461	0
I	3033836	3033955	SPNCRNA.88.1	+	3033836	3033955	1	119	0
I	3040706	3042421	SPNCRNA.878.1	-	3040706	3042421	1	1715	0
I	3047676	3047758	SPATRNASER.02.1	-	3047676	3047758	1	82	0
I	3051824	3053237	SPNCRNA.879.1	+	3051824	3053237	1	1413	0
I	3053213	3059282	SPAC24C9.07c.1	-	3053597	3059282	1	6069	0
I	3060232	3061210	SPNCRNA.881.1	-	3060232	3061210	1	978	0
I	3060291	3061152	SPNCRNA.212.1	+	3060291	3061152	1	861	0
I	3060537	3061276	SPNCRNA.882.1	+	3060537	3061276	1	739	0
I	3069321	3071192	SPAC24C9.12c.1	-	3069613	3071017	1	1871	0
I	3071583	3072124	SPAC24C9.13c.1	-	3071684	3072004	2	167321	0,220
I	3072854	3073852	SPNCRNA.883.1	-	3072854	3073852	1	998	0
I	3074266	3075988	SPAC24C9.15c.1	-	3074466	3075988	3	453582560	0,505,1162
I	3076913	3077076	SPNCRNA.213.1	+	3076913	3077076	1	163	0
I	3086309	3086392	SPATRNALYS.05.1	+	3086309	3086392	1	83	0
I	3086471	3086930	SPNCRNA.215.1	+	3086471	3086930	1	459	0
I	3093707	3094885	SPAC16A10.08c.1	-	3093972	3094885	2	466657	0,521
I	3095074	3098883	SPAC589.02c.1	-	3095074	3098883	3	3516,156,6	0,3551,3803
I	3098722	3099907	SPNCRNA.886.1	+	3098722	3099907	1	1185	0
I	3104100	3105908	SPAC589.07c.1	-	3104342	3105908	6	264,721,160,107,74,38	0,332,1118,1340,1512,1770
I	3109173	3110015	SPAC589.11.1	+	3109173	3110015	2	139410	0,432
I	3110200	3113396	SPAC589.12.1	+	3110200	3113300	2	1232889	0,307
I	3113451	3114574	SPAC688.02c.1	-	3113564	3114412	3	548148212	0,677,911
I	3114507	3115380	SPAC688.03c.1	-	3114615	3115326	2	466278	0,595
I	3117040	3119298	SPNCRNA.887.1	+	3117040	3119298	1	2258	0
I	312214	316276	SPNCRNA.636.1	-	312214	316276	1	4062	0
I	3137358	3138684	SPNCRNA.888.1	-	3137358	3138684	1	1326	0
I	3141074	3143182	SPNCRNA.890.1	-	3141074	3143182	1	2108	0
I	3144728	3145622	SPNCRNA.891.1	-	3144728	3145622	1	894	0
I	3145213	3145728	SPAC3G9.16c.1	+	3145213	3145728	2	37431	0,84
I	3145866	3146559	SPAC3G9.15c.1	+	3145866	3146559	1	693	0
I	3149909	3150625	SPNCRNA.216.1	+	3149909	3150625	1	716	0
I	3157429	3157501	SPATRNAALA.03.1	+	3157429	3157501	1	72	0
I	3158481	3159120	SPNCRNA.217.1	+	3158481	3159120	1	639	0
I	3159752	3162245	SPAC3G9.11c.1	+	3160229	3161942	1	2493	0
I	3164748	3164820	SPATRNATHR.04.1	+	3164748	3164820	1	72	0
I	3165353	3165546	SPRRNA.14.1	+	3165353	3165546	1	193	0
I	3165555	3166062	SPNCRNA.218.1	+	3165555	3166062	1	507	0
I	3166348	3166977	SPNCRNA.892.1	-	3166348	3166977	1	629	0
I	317717	319171	SPNCRNA.637.1	+	317717	319171	1	1454	0
I	3177930	3179269	SPNCRNA.893.1	+	3177930	3179269	1	1339	0
I	3177947	3178309	SPNCRNA.87.1	-	3177947	3178309	1	362	0
I	3178806	3179222	SPNCRNA.219.1	+	3178806	3179222	1	416	0
I	3179342	3180033	SPAC3G9.03.1	-	3179461	3179992	2	367213	0,478
I	3180425	3181164	SPAC3G9.02.1	-	3180425	3181136	1	739	0
I	3181429	3183290	SPAC3G9.01.1	-	3181638	3183027	1	1861	0
I	3190455	3191217	SPNCRNA.14.1	+	3190455	3191217	1	762	0
I	319814	321825	SPAC12G12.14c.1	+	319973	321503	1	2011	0
I	3202437	3203222	SPNCRNA.894.1	-	3202437	3203222	1	785	0
I	32033	33012	SPAC977.02.1	+	32229	32670	1	979	0
I	3205961	3206626	SPAC1486.07c.1	-	3206099	3206534	1	665	0
I	3207421	3207941	SPNCRNA.895.1	-	3207421	3207941	1	520	0
I	321763	324129	SPAC12G12.13c.1	+	321923	323978	1	2366	0
I	321795	322578	SPNCRNA.638.1	-	321795	322578	1	783	0
I	3226536	3228414	SPNCRNA.896.1	-	3226536	3228414	1	1878	0
I	3226928	3228192	SPAC6G10.06.1	+	3226928	3228192	3	52342737	0,113,527
I	3228496	3231398	SPAC6G10.07.1	+	3228532	3230924	2	2872566	0,336
I	3231334	3232976	SPAC6G10.08.1	+	3231535	3232855	1	1642	0
I	3239231	3241177	SPAC6G10.12c.1	-	3239365	3240967	1	1946	0
I	3239375	3241996	SPNCRNA.897.1	+	3239375	3241996	1	2621	0
I	3241117	3242432	SPAC6G9.01c.1	-	3241562	3242332	3	453,99,281	0,537,1034
I	3247788	3252881	SPAC6G9.04.1	+	3248597	3252554	1	5093	0
I	3254400	3258320	SPAC6G9.06c.1	-	3254538	3258165	1	3920	0
I	3255911	3258277	SPNCRNA.898.1	+	3255911	3258277	1	2366	0
I	3258470	3259527	SPAC6G9.07c.1	-	3258571	3259444	4	278,124,203,86	0,459,713,971
I	3272075	3272699	SPAC6G9.13c.1	-	3272149	3272699	2	190283	0,341
I	3273275	3274078	SPNCRNA.899.1	-	3273275	3274078	1	803	0
I	328195	329545	SPAC12G12.10.1	-	328221	329484	1	1350	0
I	3283003	3285778	SPAPB1E7.02c.1	-	3283194	3285745	3	2295152225	0,2353,2550
I	3296333	3300116	SPAPB1E7.06c.1	-	3297519	3299867	3	3215,92,336	0,3299,3447
I	329809	332816	SPAC12G12.09.1	-	329809	332743	1	3007	0
I	3300811	3302082	SPNCRNA.900.1	-	3300811	3302082	1	1271	0
I	3316320	3316601	SPNCRNA.901.1	-	3316320	3316601	1	281	0
I	3316465	3316609	SPSNORNA.43.1	-	3316465	3316609	1	144	0
I	3325262	3326138	SPAC2E1P5.02c.1	-	3325646	3326138	1	876	0
I	3327939	3329476	SPAC2E1P5.04c.1	-	3327939	3329007	1	1537	0
I	3348102	3352396	SPAC26A3.09c.1	-	3348568	3352396	1	4294	0
I	3361546	3365548	SPAC26A3.13c.1	-	3361546	3365548	1	4002	0
I	3371460	3372746	SPNCRNA.902.1	+	3371460	3372746	1	1286	0
I	3374695	3375004	SPAC8E11.12.1	+	3374695	3375004	1	309	0
I	3374996	3375669	SPNCRNA.903.1	-	3374996	3375669	1	673	0
I	3375515	3376823	SPAC8E11.08c.1	+	3375515	3375818	1	1308	0
I	3377900	3378094	SPAC8E11.06.1	-	3377900	3378094	3	58,18,26	0,103,168
I	3382273	3383404	SPAC8E11.03c.1	+	3382331	3383404	2	131926	0,205
I	33834	34272	SPAC977.03.1	+	33834	34272	1	438	0
I	3385555	3388141	SPNCRNA.905.1	-	3385555	3388141	1	2586	0
I	3394874	3395200	SPSNORNA.20.1	+	3394874	3395200	1	326	0
I	3394882	3395271	SPNCRNA.906.1	+	3394882	3395271	1	389	0
I	3395216	3397638	SPAC959.05c.1	-	3395684	3397638	2	2111256	0,2166
I	339547	339642	SPSNORNA.29.1	-	339547	339642	1	95	0
I	339765	342080	SPAC12G12.04.1	-	340106	341855	1	2315	0
I	3398023	3398701	SPAC959.06c.1	-	3398023	3398701	1	678	0
I	340208	341954	SPNCRNA.639.1	+	340208	341954	1	1746	0
I	342089	345182	SPAC12G12.03.1	-	343398	345129	1	3093	0
I	3443054	3443144	SPATRNAARG.01.1	+	3443054	3443144	1	90	0
I	3443851	3446506	SPNCRNA.908.1	-	3443851	3446506	1	2655	0
I	345362	346322	SPNCRNA.640.1	+	345362	346322	1	960	0
I	3455155	3456884	SPNCRNA.909.1	-	3455155	3456884	1	1729	0
I	3455830	3456760	SPNCRNA.910.1	+	3455830	3456760	1	930	0
I	3456693	3459197	SPAC3A11.07.1	+	3457272	3458928	1	2504	0
I	3477737	3479037	SPNCRNA.911.1	-	3477737	3479037	1	1300	0
I	3478389	3479049	SPNCRNA.529.1	-	3478389	3479049	1	660	0
I	3497896	3498505	SPNCRNA.222.1	+	3497896	3498505	1	609	0
I	3498329	3498616	SPNCRNA.912.1	-	3498329	3498616	1	287	0
I	3498549	3500633	SPNCRNA.913.1	-	3498549	3500633	1	2084	0
I	3504033	3506896	SPAC16E8.02.1	+	3504260	3505580	4	236,67,593,1316	0,277,388,1547
I	3505108	3505657	SPAC16E8.03.1	+	3505143	3505580	2	101347	0,202
I	3507197	3508537	SPAC16E8.05c.1	-	3507604	3508277	2	853444	0,896
I	3507205	3508322	SPNCRNA.914.1	+	3507205	3508322	1	1117	0
I	3508688	3509194	SPNCRNA.562.1	+	3508688	3509194	1	506	0
I	3522649	3522973	SPAC16E8.18.1	-	3522649	3522973	1	324	0
I	3523135	3524339	SPAC16E8.12c.1	-	3523135	3524098	4	509,72,119,135	0,789,908,1069
I	3527948	3529446	SPAC16E8.15.1	+	3528158	3529017	3	437175684	0,505,814
I	3544326	3544849	SPNCRNA.915.1	+	3544326	3544849	1	523	0
I	3547888	3548049	SPRRNA.15.1	-	3547888	3548049	1	161	0
I	3554124	3554684	SPNCRNA.916.1	+	3554124	3554684	1	560	0
I	3558765	3559116	SPNCRNA.124.1	+	3558765	3559116	1	351	0
I	3559753	3559826	SPATRNATRP.01.1	-	3559753	3559826	1	73	0
I	3562947	3566829	SPAC17A2.06c.1	-	3563010	3566829	1	3882	0
I	3567222	3567861	SPAC17A2.07c.1	-	3567222	3567858	2	416121	0,518
I	3574994	3575687	SPAC17A2.10c.1	-	3574994	3575687	1	693	0
I	3576108	3576590	SPNCRNA.917.1	+	3576108	3576590	1	482	0
I	35767	36382	SPAC977.05c.1	-	35767	36382	1	615	0
I	3576768	3578782	SPAC17A2.11.1	+	3577108	3577762	1	2014	0
I	3578603	3581329	SPNCRNA.918.1	-	3578603	3581329	1	2726	0
I	3578770	3583005	SPAC17A2.12.1	+	3580222	3582916	1	4235	0
I	3584832	3585787	SPNCRNA.919.1	-	3584832	3585787	1	955	0
I	3584978	3586233	SPNCRNA.920.1	+	3584978	3586233	1	1255	0
I	3586166	3588777	SPAC17A2.14.1	+	3586434	3588288	1	2611	0
I	3588584	3591355	SPNCRNA.600.1	-	3588584	3591355	1	2771	0
I	3588614	3590624	SPAC17G6.02c.1	-	3588974	3589949	1	2010	0
I	3591947	3592044	SPATRNALEU.03.1	+	3591947	3592044	1	97	0
I	3592234	3592483	SPNCRNA.226.1	+	3592234	3592483	1	249	0
I	3592993	3596453	SPAC17G6.04c.1	-	3595196	3596345	1	3460	0
I	3596386	3598863	SPAC17G6.05c.1	-	3596471	3598799	1	2477	0
I	3610062	3611779	SPNCRNA.921.1	+	3610062	3611779	1	1717	0
I	3610147	3611124	SPNCRNA.227.1	+	3610147	3611124	1	977	0
I	3612081	3614883	SPAC17G6.12.1	+	3612123	3614883	5	110,87,65,77,2007	0,155,340,516,795
I	361497	362202	SPNCRNA.642.1	-	361497	362202	1	705	0
I	361556	363654	SPAC630.15.1	+	361556	361874	1	2098	0
I	3615584	3617100	SPAC17G6.13.1	+	3615625	3616927	1	1516	0
I	3617070	3618932	SPAC17G6.14c.1	-	3617540	3618845	1	1862	0
I	3618868	3620815	SPAC17G6.15c.1	-	3619343	3620657	6	835,336,74,110,26,221	0,939,1315,1502,1660,1726
I	3625434	3626731	SPNCRNA.922.1	-	3625434	3626731	1	1297	0
I	3634369	3634504	SPRRNA.16.1	+	3634369	3634504	1	135	0
I	3635142	3635859	SPNCRNA.923.1	-	3635142	3635859	1	717	0
I	3639472	3639914	SPNCRNA.924.1	+	3639472	3639914	1	442	0
I	3642497	3642845	SPAC1142.09.1	+	3642497	3642845	1	348	0
I	3645888	3649035	SPNCRNA.925.1	-	3645888	3649035	1	3147	0
I	365154	365226	SPATRNAPRO.01.1	+	365154	365226	1	72	0
I	3658389	3659824	SPAC8C9.11.1	+	3659131	3659571	3	802150298	0,881,1137
I	3659523	3660197	SPNCRNA.228.1	+	3659523	3660197	1	674	0
I	3692694	3694745	SPNCRNA.927.1	-	3692694	3694745	1	2051	0
I	3697472	3700084	SPNCRNA.928.1	-	3697472	3700084	1	2612	0
I	369790	374217	SPAC630.13c.1	-	369944	373964	1	4427	0
I	3700664	3700737	SPATRNACYS.03.1	+	3700664	3700737	1	73	0
I	3701555	3701628	SPATRNAPHE.01.1	+	3701555	3701628	1	73	0
I	3710738	3710821	SPATRNAVAL.04.1	-	3710738	3710821	1	83	0
I	3710889	3711593	SPNCRNA.929.1	-	3710889	3711593	1	704	0
I	3710908	3711379	SPNCRNA.229.1	+	3710908	3711379	1	471	0
I	3711919	3716625	SPNCRNA.930.1	-	3711919	3716625	1	4706	0
I	3728515	3729034	SPAC15E1.07c.1	-	3728515	3729034	1	519	0
I	3731312	3732279	SPNCRNA.931.1	-	3731312	3732279	1	967	0
I	3732640	3733195	SPNCRNA.932.1	-	3732640	3733195	1	555	0
I	3735862	3735954	SPNCRNA.524.1	+	3735862	3735954	1	92	0
I	3736519	3736592	SPATRNAARG.02.1	+	3736519	3736592	1	73	0
I	3736524	3743579	SPAP7G5.03.1	+	3736954	3739106	2	19405075	0,1980
I	374315	377908	SPAC630.14c.1	-	374682	377200	4	1515,353,88,916	0,1778,2528,2677
I	3744010	3745649	SPNCRNA.933.1	-	3744010	3745649	1	1639	0
I	3745777	3748833	SPNCRNA.935.1	+	3745777	3748833	1	3056	0
I	3752333	3752406	SPATRNAPHE.02.1	-	3752333	3752406	1	73	0
I	3753159	3753692	SPNCRNA.84.1	-	3753159	3753692	1	533	0
I	3753729	3754811	SPNCRNA.230.1	+	3753729	3754811	1	1082	0
I	3761022	3762114	SPNCRNA.231.1	+	3761022	3762114	1	1092	0
I	3762864	3763969	SPNCRNA.232.1	+	3762864	3763969	1	1105	0
I	3765007	3765081	SPATRNAALA.04.1	-	3765007	3765081	1	74	0
I	3765433	3765505	SPATRNAGLU.03.1	-	3765433	3765505	1	72	0
I	3768289	3768363	SPATRNAILE.03.1	+	3768289	3768363	1	74	0
I	3769524	3770016	SPNCRNA.233.1	+	3769524	3770016	1	492	0
I	3773909	3773983	SPATRNAILE.04.1	-	3773909	3773983	1	74	0
I	3775472	3775847	SPNCRNA.333.1	+	3775472	3775847	1	375	0
I	3775853	3776756	SPNCRNA.396.1	+	3775853	3776756	1	903	0
I	3776767	3776839	SPATRNAGLU.04.1	+	3776767	3776839	1	72	0
I	3777191	3777265	SPATRNAALA.05.1	+	3777191	3777265	1	74	0
I	377843	384751	SPAC1751.01c.1	-	378191	380354	1	6908	0
I	3786104	3787136	SPNCRNA.234.1	+	3786104	3787136	1	1032	0
I	3789399	3789948	SPNCRNA.95.1	+	3789399	3789948	1	549	0
I	3791896	3793891	SPNCRNA.936.1	+	3791896	3793891	1	1995	0
I	3802550	3804954	SPAC1556.06.1	+	3802550	3804954	2	2037294	0,2110
I	3809344	3810099	SPAC1F12.02c.1	-	3809527	3810034	1	755	0
I	3811065	3811895	SPAC1F12.04c.1	-	3811065	3811641	1	830	0
I	3817466	3818781	SPNCRNA.937.1	-	3817466	3818781	1	1315	0
I	3818667	3820526	SPAC1F12.09.1	+	3818667	3820420	3	240724807	0,286,1052
I	3825449	3826227	SPNCRNA.938.1	+	3825449	3826227	1	778	0
I	3826455	3829377	SPAC4H3.03c.1	-	3826639	3828589	1	2922	0
I	3830379	3830498	SPRRNA.17.1	+	3830379	3830498	1	119	0
I	3835807	3836869	SPNCRNA.939.1	+	3835807	3836869	1	1062	0
I	3837305	3839626	SPAC4H3.06.1	+	3837430	3838000	4	214,184,80,1687	0,262,505,634
I	3840749	3841441	SPNCRNA.940.1	-	3840749	3841441	1	692	0
I	3841497	3843136	SPAC4H3.08.1	+	3841580	3842441	1	1639	0
I	3846747	3847768	SPNCRNA.941.1	+	3846747	3847768	1	1021	0
I	3846892	3847670	SPNCRNA.236.1	+	3846892	3847670	1	778	0
I	3851005	3851107	SPNCRNA.510.1	+	3851005	3851107	1	102	0
I	3851023	3851310	SPNCRNA.942.1	+	3851023	3851310	1	287	0
I	3851645	3852219	SPAC4H3.12c.1	-	3851913	3852219	1	574	0
I	3851767	3851841	SPSNORNA.30.1	-	3851767	3851841	1	74	0
I	3860906	3862735	SPAC1071.03c.1	-	3861718	3862735	1	1829	0
I	3863000	3863504	SPAC1071.04c.1	-	3863000	3863504	1	504	0
I	3863703	3864395	SPNCRNA.237.1	+	3863703	3864395	1	692	0
I	3863739	3864474	SPNCRNA.943.1	-	3863739	3864474	1	735	0
I	3864466	3866158	SPAC1071.05.1	+	3864522	3865542	1	1692	0
I	3866535	3868410	SPAC1071.06.1	+	3866587	3868159	1	1875	0
I	3869016	3871602	SPAC1071.09c.1	-	3870659	3871508	1	2586	0
I	3875655	3876105	SPNCRNA.92.1	+	3875655	3876105	1	450	0
I	3876756	3877223	SPNCRNA.93.1	+	3876756	3877223	1	467	0
I	3878006	3881812	SPAC1071.13.1	+	3881344	3881662	1	3806	0
I	3879033	3880272	SPNCRNA.945.1	-	3879033	3880272	1	1239	0
I	388351	389177	SPNCRNA.643.1	-	388351	389177	1	826	0
I	3884813	3886550	SPNCRNA.946.1	-	3884813	3886550	1	1737	0
I	3886096	3886270	SPAC926.10.1	-	3886096	3886270	1	174	0
I	3891661	3891784	SPRRNA.18.1	-	3891661	3891784	1	123	0
I	3892031	3892999	SPNCRNA.947.1	+	3892031	3892999	1	968	0
I	3910534	3912648	SPAC323.03c.1	-	3910739	3912604	4	1250137484106	0,1293,1482,2008
I	3914873	3915677	SPNCRNA.948.1	+	3914873	3915677	1	804	0
I	3921017	3921711	SPAC323.08.1	+	3921075	3921711	1	694	0
I	3922353	3923496	SPAC2F3.01.1	+	3922353	3923313	1	1143	0
I	3927450	3928579	SPAC2F3.04c.1	-	3927780	3928317	2	434611	0,518
I	3928624	3929950	SPAC2F3.05c.1	-	3928808	3929636	1	1326	0
I	3935527	3935833	SPAC2F3.07c.1	-	3935527	3935833	1	306	0
I	3936948	3940336	SPNCRNA.949.1	-	3936948	3940336	1	3388	0
I	3938841	3939103	SPNCRNA.950.1	+	3938841	3939103	1	262	0
I	39415	40072	SPAC977.06.1	+	39430	40050	2	433174	0,483
I	3943041	3946427	SPAC2F3.10.1	+	3943193	3946043	1	3386	0
I	3946545	3947987	SPAC2F3.11.1	+	3946577	3947774	2	1501250	0,192
I	3947884	3950224	SPAC2F3.13c.1	-	3947929	3950178	3	45865228	0,1172,2112
I	3947911	3949019	SPAC2F3.12c.1	-	3947929	3948946	5	330,76,87,153,285	0,371,495,626,823
I	3951824	3952600	SPNCRNA.239.1	+	3951824	3952600	1	776	0
I	3953280	3953856	SPNCRNA.240.1	+	3953280	3953856	1	576	0
I	3971563	3974699	SPAC11G7.06c.1	-	3971941	3973234	1	3136	0
I	3974309	3976265	SPAPB18E9.01.1	+	3974309	3976079	8	176,89,102,254,237,348,81,252	0,231,364,569,883,1175,1572,1704
I	3974634	3976212	SPNCRNA.952.1	-	3974634	3976212	1	1578	0
I	3981076	3982894	SPNCRNA.953.1	+	3981076	3982894	1	1818	0
I	3982324	3985104	SPAPB18E9.04c.1	-	3982701	3985104	1	2780	0
I	3986647	3986920	SPAPB18E9.05c.1	-	3986647	3986920	1	273	0
I	3987032	3991388	SPAPB15E9.01c.1	-	3987238	3990349	1	4356	0
I	3991829	3994099	SPAPB15E9.02c.1	-	3991877	3992444	1	2270	0
I	3993494	3995104	SPAPB15E9.06.1	+	3994001	3994271	1	1610	0
I	3996422	4000424	SPAPB15E9.03c.1	-	3996422	4000424	1	4002	0
I	4004552	4005632	SPNCRNA.955.1	-	4004552	4005632	1	1080	0
I	4008053	4009905	SPNCRNA.53.1	-	4008053	4009905	1	1852	0
I	4008074	4010224	SPAC27E2.11c.1	-	4009572	4009818	1	2150	0
I	4008510	4008693	SPAC27E2.13.1	+	4008510	4008693	1	183	0
I	4010591	4011430	SPAC27E2.04c.1	-	4010685	4011249	1	839	0
I	4010912	4011317	SPAC27E2.12.1	+	4010912	4011317	2	18213	0,192
I	4022491	4026493	SPAC27E2.08.1	+	4022491	4026493	1	4002	0
I	4049490	4049696	SPNCRNA.956.1	-	4049490	4049696	1	206	0
I	4059027	4059106	SPATRNALEU.04.1	-	4059027	4059106	1	79	0
I	4078388	4081129	SPAC19G12.16c.1	-	4078937	4080950	1	2741	0
I	40794	41489	SPNCRNA.136.1	+	40794	41489	1	695	0
I	4081482	4083493	SPAC23A1.02c.1	-	4081482	4082775	1	2011	0
I	40915	41770	SPNCRNA.601.1	-	40915	41770	1	855	0
I	4094907	4096013	SPNCRNA.957.1	-	4094907	4096013	1	1106	0
I	4103732	4104756	SPAC23A1.15c.1	-	4103941	4104622	1	1024	0
I	4104689	4105778	SPAC23A1.16c.1	-	4105115	4105709	1	1089	0
I	4106633	4106726	SPNCRNA.341.1	+	4106633	4106726	1	93	0
I	4113672	4117261	SPAC23A1.19c.1	-	4113814	4117181	2	2613153	0,436
I	4119467	4120689	SPNCRNA.959.1	-	4119467	4120689	1	1222	0
I	4123494	4124888	SPNCRNA.960.1	-	4123494	4124888	1	1394	0
I	4128632	4129794	SPNCRNA.961.1	-	4128632	4129794	1	1162	0
I	4136045	4137000	SPNCRNA.962.1	+	4136045	4137000	1	955	0
I	4136051	4137107	SPNCRNA.306.1	+	4136051	4137107	1	1056	0
I	4140076	4141041	SPNCRNA.963.1	+	4140076	4141041	1	965	0
I	4141280	4142329	SPAC26H5.10c.1	-	4141739	4142213	1	1049	0
I	4142299	4143913	SPNCRNA.964.1	-	4142299	4143913	1	1614	0
I	4153990	4154750	SPNCRNA.965.1	-	4153990	4154750	1	760	0
I	4154911	4155002	SPSNORNA.13.1	+	4154911	4155002	1	91	0
I	4155464	4156320	SPAC25B8.01.1	+	4155472	4155973	1	856	0
I	4168211	4170189	SPAC25B8.08.1	+	4168211	4169984	1	1978	0
I	4170165	4170605	SPNCRNA.966.1	+	4170165	4170605	1	440	0
I	4170478	4172438	SPNCRNA.967.1	-	4170478	4172438	1	1960	0
I	4170549	4171657	SPAC25B8.09.1	+	4170713	4171469	1	1108	0
I	4172122	4173547	SPAC25B8.10.1	+	4172175	4172946	1	1425	0
I	4176459	4178343	SPAC25B8.12c.1	-	4177020	4177932	1	1884	0
I	4178277	4179532	SPNCRNA.968.1	-	4178277	4179532	1	1255	0
I	4184340	4184518	SPRRNA.19.1	-	4184340	4184518	1	178	0
I	4185112	4187416	SPAC25B8.14.1	+	4185522	4186434	1	2304	0
I	4187324	4189859	SPAC25B8.16.1	+	4187546	4189643	1	2535	0
I	4190287	4191481	SPAC25B8.17.1	+	4190352	4191240	1	1194	0
I	4191409	4192157	SPAC25B8.18.1	+	4191612	4191978	1	748	0
I	4195641	4196021	SPAC683.03.1	+	4195641	4195959	1	380	0
I	4197368	4199832	SPNCRNA.969.1	+	4197368	4199832	1	2464	0
I	4198687	4200078	SPNCRNA.970.1	-	4198687	4200078	1	1391	0
I	4205571	4206759	SPNCRNA.971.1	-	4205571	4206759	1	1188	0
I	42056	43307	SPAC977.07c.1	-	42056	43307	1	1251	0
I	4208999	4212436	SPNCRNA.972.1	+	4208999	4212436	1	3437	0
I	4230527	4231826	SPNCRNA.973.1	-	4230527	4231826	1	1299	0
I	4230614	4232557	SPAC1F7.06.1	+	4230849	4231605	1	1943	0
I	4231811	4232976	SPNCRNA.243.1	+	4231811	4232976	1	1165	0
I	4238305	4238401	SPSNORNA.14.1	+	4238305	4238401	1	96	0
I	4240849	4240968	SPRRNA.20.1	-	4240849	4240968	1	119	0
I	425630	427415	SPAC13C5.02.1	+	426029	427342	3	4392171052	0,475,733
I	4259370	4259795	SPNCRNA.13.1	-	4259370	4259795	1	425	0
I	4265148	4265245	SPATRNASER.03.1	+	4265148	4265245	2	37,45	0,52
I	4265252	4265324	SPATRNAMET.03.1	+	4265252	4265324	1	72	0
I	4268661	4268916	SPNCRNA.98.1	+	4268661	4268916	1	255	0
I	427349	430121	SPAC13C5.03.1	+	427582	429318	3	5946051469	0,636,1303
I	4275059	4275902	SPAC2C4.08.1	+	4275170	4275902	1	843	0
I	4276008	4277492	SPAC2C4.09.1	+	4276023	4276786	3	236387749	0,285,735
I	429029	430050	SPNCRNA.644.1	-	429029	430050	1	1021	0
I	4291998	4292912	SPNCRNA.974.1	+	4291998	4292912	1	914	0
I	4296935	4298605	SPAC25G10.02.1	-	4297128	4297905	1	1670	0
I	430055	431032	SPAC13C5.04.1	+	430129	430876	1	977	0
I	430087	431033	SPNCRNA.645.1	-	430087	431033	1	946	0
I	4301366	4303885	SPAC25G10.04c.1	-	4301401	4303777	1	2519	0
I	431219	431301	SPSNORNA.01.1	+	431219	431301	1	82	0
I	4323423	4325633	SPAC27F1.05c.1	-	4323651	4325106	1	2210	0
I	4325962	4326914	SPAC27F1.10.1	-	4326487	4326793	1	952	0
I	4326025	4326614	SPNCRNA.978.1	+	4326025	4326614	1	589	0
I	4328944	4330716	SPAC27F1.07.1	+	4329103	4330456	1	1772	0
I	4330992	4333166	SPAC27F1.08.1	+	4331338	4332904	1	2174	0
I	4337096	4338471	SPAC23D3.01.1	+	4337247	4338471	1	1375	0
I	4338672	4339944	SPAC23D3.02.1	+	4338741	4339816	2	1431077	0,195
I	434101	435179	SPAC13C5.06c.1	-	434523	435101	2	730304	0,774
I	434103	434843	SPNCRNA.05.1	+	434103	434843	2	164506	0,234
I	435112	436058	SPNCRNA.646.1	-	435112	436058	1	946	0
I	4358457	4362334	SPNCRNA.980.1	-	4358457	4362334	1	3877	0
I	4360503	4362103	SPNCRNA.244.1	+	4360503	4362103	1	1600	0
I	4366464	4367503	SPNCRNA.981.1	+	4366464	4367503	1	1039	0
I	436952	438699	SPNCRNA.647.1	-	436952	438699	1	1747	0
I	4373038	4374987	SPAC23D3.14c.1	-	4373038	4374987	4	288888315255	0,332,1338,1694
I	4392812	4393963	SPAC30.02c.1	-	4392898	4393889	2	760246	0,905
I	4394375	4395639	SPAC30.03c.1	-	4394706	4395592	6	366,169,83,237,76,110	0,423,634,755,1040,1154
I	4395186	4395595	SPNCRNA.983.1	+	4395186	4395595	1	409	0
I	4400532	4401742	SPNCRNA.984.1	-	4400532	4401742	1	1210	0
I	4400685	4401605	SPNCRNA.246.1	+	4400685	4401605	1	920	0
I	4400707	4401528	SPNCRNA.985.1	+	4400707	4401528	1	821	0
I	4414823	4415174	SPAC29E6.07.1	+	4414823	4415174	1	351	0
I	4424581	4427095	SPNCRNA.986.1	+	4424581	4427095	1	2514	0
I	4429022	4429505	SPNCRNA.247.1	+	4429022	4429505	1	483	0
I	4431868	4434012	SPAC16.05c.1	-	4432303	4433632	1	2144	0
I	4434320	4434475	SPNCRNA.99.1	-	4434320	4434475	1	155	0
I	4434477	4437145	SPAC9E9.02.1	-	4435616	4435913	1	2668	0
I	4434860	4435509	SPAC9E9.01.1	+	4434860	4435201	2	37571	0,78
I	4437310	4437862	SPAC9E9.17c.1	-	4437310	4437862	4	91,43,82,3	0,295,421,549
I	4437465	4438921	SPNCRNA.987.1	+	4437465	4438921	1	1456	0
I	4439117	4439451	SPNCRNA.12.1	+	4439117	4439451	1	334	0
I	4442519	4442919	SPNCRNA.988.1	-	4442519	4442919	1	400	0
I	4455877	4458045	SPNCRNA.989.1	+	4455877	4458045	1	2168	0
I	4458175	4461222	SPNCRNA.990.1	+	4458175	4461222	1	3047	0
I	445999	446071	SPATRNAVAL.01.1	+	445999	446071	1	72	0
I	446174	446702	SPNCRNA.649.1	-	446174	446702	1	528	0
I	4462939	4467700	SPAC9E9.12c.1	-	4463078	4467362	1	4761	0
I	44643	45468	SPAC977.08.1	+	44703	45414	1	825	0
I	446490	450726	SPAC23E2.02.1	+	446490	450530	3	2325631432	0,188,2804
I	4469174	4470627	SPAC9E9.14.1	+	4469660	4470356	1	1453	0
I	4470560	4471415	SPAC9E9.15.1	+	4470680	4471340	1	855	0
I	4471655	4472041	SPNCRNA.311.1	+	4471655	4472041	1	386	0
I	4472217	4473227	SPNCRNA.991.1	-	4472217	4473227	1	1010	0
I	4496732	4498140	SPAC17C9.02c.1	+	4496969	4497789	2	3001065	0,343
I	4498073	4500581	SPAC17C9.01c.1	+	4498131	4500280	3	3621711824	0,407,684
I	450859	453603	SPAC23E2.03c.1	-	451209	452919	1	2744	0
I	4510982	4515015	SPAC27D7.03c.1	-	4511039	4513292	1	4033	0
I	4515181	4515993	SPNCRNA.993.1	+	4515181	4515993	1	812	0
I	4516069	4517070	SPNCRNA.130.1	+	4516069	4517070	1	1001	0
I	4529388	4531031	SPAC27D7.11c.1	-	4529461	4530853	1	1643	0
I	4531035	4532486	SPNCRNA.995.1	-	4531035	4532486	1	1451	0
I	4531069	4531631	SPNCRNA.248.1	+	4531069	4531631	1	562	0
I	4531143	4532754	SPNCRNA.996.1	+	4531143	4532754	1	1611	0
I	4532856	4532927	SPATRNAASP.01.1	+	4532856	4532927	1	71	0
I	4534673	4536686	SPAC27D7.13c.1	-	4534673	4536686	1	2013	0
I	453734	455859	SPNCRNA.650.1	+	453734	455859	1	2125	0
I	4544919	4545584	SPNCRNA.997.1	-	4544919	4545584	1	665	0
I	4554076	4557450	SPNCRNA.998.1	-	4554076	4557450	1	3374	0
I	4554191	4555181	SPNCRNA.563.1	-	4554191	4555181	1	990	0
I	4557437	4558364	SPNCRNA.999.1	+	4557437	4558364	1	927	0
I	4563179	4563654	SPNCRNA.1000.1	-	4563179	4563654	1	475	0
I	456526	456645	SPRRNA.11.1	+	456526	456645	1	119	0
I	4565699	4566208	SPNCRNA.249.1	+	4565699	4566208	1	509	0
I	4580560	4582160	SPNCRNA.1001.1	-	4580560	4582160	1	1600	0
I	4582298	4584511	SPAC12B10.05.1	+	4582377	4584333	12	251,103,21,27,14,33,128,384,78,222,108,349	0,296,448,508,570,632,708,875,1320,1441,1712,1864
I	4586308	4588764	SPAC12B10.08c.1	-	4586583	4588058	3	1082488782	0,1141,1674
I	4588249	4589793	SPAC12B10.09.1	+	4588249	4589574	4	261157455384	0,317,619,1160
I	4590151	4591524	SPAC12B10.10.1	+	4590264	4591524	1	1373	0
I	4591802	4593532	SPNCRNA.1002.1	-	4591802	4593532	1	1730	0
I	4591854	4593567	SPAC12B10.11.1	+	4591854	4593567	1	1713	0
I	4597465	4599622	SPAC12B10.14c.1	-	4597566	4599622	2	1561943	0,214
I	4599992	4600855	SPNCRNA.1003.1	+	4599992	4600855	1	863	0
I	4600262	4600817	SPAC12B10.15c.1	-	4600262	4600706	1	555	0
I	4604710	4606362	SPNCRNA.1004.1	+	4604710	4606362	1	1652	0
I	4604879	4606871	SPAC1093.07.1	-	4605906	4606143	1	1992	0
I	460792	461752	SPNCRNA.651.1	+	460792	461752	1	960	0
I	4619538	4621625	SPNCRNA.1005.1	-	4619538	4621625	1	2087	0
I	4622165	4635111	SPAC1093.06c.1	-	4622165	4634756	1	12946	0
I	4625839	4627501	SPNCRNA.1006.1	+	4625839	4627501	1	1662	0
I	4636965	4638001	SPNCRNA.1007.1	-	4636965	4638001	1	1036	0
I	4638116	4639647	SPAC30C2.04.1	+	4638116	4639469	1	1531	0
I	4647229	4649094	SPNCRNA.1008.1	-	4647229	4649094	1	1865	0
I	4650597	4651189	SPNCRNA.1009.1	+	4650597	4651189	1	592	0
I	4651350	4651792	SPNCRNA.46.1	-	4651350	4651792	1	442	0
I	4652936	4654387	SPAC144.02.1	+	4653092	4653842	1	1451	0
I	465301	468551	SPNCRNA.652.1	-	465301	468551	1	3250	0
I	4654242	4654578	SPNCRNA.1010.1	-	4654242	4654578	1	336	0
I	4654512	4655254	SPNCRNA.1011.1	-	4654512	4655254	1	742	0
I	4654661	4656456	SPAC144.03.1	+	4654683	4656410	3	66,97,1210	0,105,585
I	4664184	4664880	SPNCRNA.1012.1	-	4664184	4664880	1	696	0
I	4673023	4673742	SPNCRNA.1013.1	-	4673023	4673742	1	719	0
I	4689240	4691828	SPAC144.18.1	+	4690169	4691207	1	2588	0
I	4689539	4690068	SPNCRNA.1016.1	-	4689539	4690068	1	529	0
I	4691802	4693738	SPAC1834.01.1	+	4691926	4693228	1	1936	0
I	4691804	4693630	SPNCRNA.1017.1	-	4691804	4693630	1	1826	0
I	4693680	4698606	SPAC1834.02.1	+	4693770	4698492	1	4926	0
I	4715430	4715502	SPATRNATHR.05.1	+	4715430	4715502	1	72	0
I	4721253	4722882	SPNCRNA.1018.1	+	4721253	4722882	1	1629	0
I	4721586	4722717	SPAC1834.13.1	-	4722347	4722584	1	1131	0
I	4737480	4738962	SPAC458.04c.1	-	4737604	4738854	5	667,95,225,144,184	0,708,849,1116,1298
I	4742716	4743476	SPNCRNA.1020.1	-	4742716	4743476	1	760	0
I	4742808	4744346	SPAC458.06.1	+	4742868	4744167	5	175,101,89,92,877	0,226,375,520,661
I	4748523	4752562	SPNCRNA.1021.1	+	4748523	4752562	1	4039	0
I	4748860	4751456	SPAPYUG7.03c.1	-	4749138	4751259	1	2596	0
I	4751389	4752521	SPAPYUG7.04c.1	-	4751683	4752332	5	345,133,50,67,230	0,420,595,768,902
I	4753882	4754807	SPNCRNA.1022.1	-	4753882	4754807	1	925	0
I	4754129	4754926	SPAPYUG7.06.1	+	4754182	4754788	1	797	0
I	4754861	4760226	SPAC1782.01.1	+	4755006	4760046	1	5365	0
I	4767041	4767986	SPAC1782.07.1	+	4767109	4767725	4	100,18,214,276	0,289,352,669
I	4767906	4769529	SPAC1782.08c.1	-	4767906	4769529	1	1623	0
I	4767922	4769721	SPNCRNA.1023.1	+	4767922	4769721	1	1799	0
I	4769990	4771708	SPAC1782.09c.1	-	4769990	4771659	2	1565,98	0,1620
I	4772001	4773217	SPAC1782.10c.1	-	4772681	4773146	1	1216	0
I	4773458	4775369	SPAC1782.12c.1	-	4774685	4775194	4	200,1199,77,206	0,277,1532,1705
I	4787153	4787928	SPNCRNA.253.1	-	4787153	4787928	1	775	0
I	4788493	4788895	SPAC22F8.03c.1	-	4788493	4788895	1	402	0
I	4791260	4791958	SPNCRNA.1024.1	+	4791260	4791958	1	698	0
I	4796976	4797059	SPATRNAALA.06.1	+	4796976	4797059	1	83	0
I	4804512	4806453	SPAC22F8.10c.1	-	4804629	4806435	1	1941	0
I	4806661	4807991	SPNCRNA.1025.1	-	4806661	4807991	1	1330	0
I	4814238	4817443	SPNCRNA.1026.1	+	4814238	4817443	1	3205	0
I	4820803	4821352	SPNCRNA.54.1	+	4820803	4821352	1	549	0
I	4821573	4824734	SPNCRNA.1027.1	+	4821573	4824734	1	3161	0
I	4826229	4826349	SPAC20G4.09.1	+	4826229	4826349	2	68,7	0,113
I	4828890	4832473	SPAC20G4.08.1	+	4829056	4832370	3	2396641463	0,2437,3120
I	4832878	4834570	SPAC4F10.02.1	+	4832928	4834428	2	2821314	0,378
I	4837761	4838650	SPNCRNA.1028.1	+	4837761	4838650	1	889	0
I	4843778	4846395	SPAC4F10.08.1	+	4844854	4846129	5	362,84,1492,201,292	0,418,554,2084,2325
I	4844660	4846130	SPNCRNA.1029.1	-	4844660	4846130	1	1470	0
I	485605	487008	SPNCRNA.653.1	+	485605	487008	1	1403	0
I	485702	486330	SPNCRNA.551.1	+	485702	486330	1	628	0
I	4860181	4861502	SPNCRNA.1030.1	+	4860181	4861502	1	1321	0
I	4861252	4863516	SPAC4F10.15c.1	-	4861529	4863448	4	3121331341284	0,371,554,1980
I	4861449	4863757	SPNCRNA.1031.1	+	4861449	4863757	1	2308	0
I	4868325	4869283	SPAC4F10.17.1	+	4868587	4868959	1	958	0
I	4869146	4870212	SPNCRNA.254.1	+	4869146	4870212	1	1066	0
I	4869465	4870169	SPNCRNA.1032.1	+	4869465	4870169	1	704	0
I	4874164	4875051	SPAC4F10.20.1	+	4874268	4874959	4	125,53,98,226	0,219,440,661
I	4875417	4878120	SPAC19B12.01.1	+	4875574	4878028	1	2703	0
I	4875423	4878190	SPNCRNA.1033.1	-	4875423	4878190	1	2767	0
I	4881384	4881949	SPNCRNA.255.1	+	4881384	4881949	1	565	0
I	489022	489562	SPNCRNA.654.1	-	489022	489562	1	540	0
I	4904220	4906394	SPAC19B12.12c.1	-	4905507	4906394	3	1479349167	0,1553,2007
I	4906911	4909314	SPAC19B12.13.1	+	4906977	4909239	1	2403	0
I	4909366	4911100	SPAPB8E5.02c.1	-	4909496	4910875	2	1378309	0,1425
I	4916602	4917521	SPAPB8E5.05.1	+	4917098	4917298	3	239294236	0,318,683
I	491815	492201	SPNCRNA.47.1	-	491815	492201	1	386	0
I	4923494	4923891	SPAPB8E5.08.1	+	4923579	4923891	1	397	0
I	4928171	4929655	SPAC1B3.02c.1	-	4928960	4929516	4	929,71,47,205	0,1077,1191,1279
I	4929566	4931302	SPNCRNA.1036.1	+	4929566	4931302	1	1736	0
I	4929853	4931230	SPAC1B3.03c.1	-	4929944	4931015	1	1377	0
I	4931203	4933354	SPNCRNA.564.1	+	4931203	4933354	1	2151	0
I	4931322	4933884	SPNCRNA.1037.1	+	4931322	4933884	1	2562	0
I	4936906	4937569	SPNCRNA.1038.1	-	4936906	4937569	1	663	0
I	4937169	4937394	SPSNORNA.42.1	-	4937169	4937394	1	225	0
I	4942199	4944230	SPAC1B3.08.1	+	4942675	4943947	1	2031	0
I	4942225	4942435	SPAC1B3.21.1	+	4942225	4942435	1	210	0
I	4944131	4945814	SPAC1B3.09c.1	-	4944227	4945814	1	1683	0
I	4946089	4948084	SPAC1B3.10c.1	-	4946089	4948084	1	1995	0
I	4961795	4963074	SPNCRNA.1039.1	+	4961795	4963074	1	1279	0
I	4966989	4968398	SPAC1B3.18c.1	-	4967222	4967894	1	1409	0
I	4967938	4969888	SPAC1952.01.1	+	4968145	4969599	2	5991124	0,826
I	4969821	4970737	SPAC1952.02.1	+	4969891	4970645	3	184,93,494	0,265,422
I	4970820	4972306	SPAC1952.03.1	+	4971116	4972137	2	728712	0,774
I	4978591	4980303	SPAC1952.07.1	+	4978618	4979759	3	1632411139	0,289,573
I	4980242	4981189	SPNCRNA.1040.1	+	4980242	4981189	1	947	0
I	4986627	4989780	SPNCRNA.1041.1	+	4986627	4989780	1	3153	0
I	4994791	4997222	SPAC1952.15c.1	-	4996029	4997222	2	1972319	0,2112
I	4994798	4995315	SPNCRNA.257.1	+	4994798	4995315	1	517	0
I	5009786	5011504	SPNCRNA.1042.1	-	5009786	5011504	1	1718	0
I	501116	501485	SPAC227.19c.1	-	501116	501485	2	132120	0,249
I	501406	504208	SPNCRNA.655.1	+	501406	504208	1	2802	0
I	501750	502444	SPAC227.02c.1	-	501766	502384	1	694	0
I	5018029	5018674	SPAC890.08.1	+	5018125	5018587	2	243282	0,363
I	5018721	5019072	SPNCRNA.258.1	+	5018721	5019072	1	351	0
I	5019370	5021436	SPAC22E12.01.1	+	5019491	5020667	2	3001715	0,351
I	5021951	5024151	SPAC22E12.02.1	+	5022183	5023077	2	5401426	0,774
I	5023944	5024116	SPNCRNA.52.1	+	5023944	5024116	1	172	0
I	5029268	5030305	SPNCRNA.1043.1	+	5029268	5030305	1	1037	0
I	5039545	5043440	SPAC22E12.11c.1	-	5039901	5042481	1	3895	0
I	504200	504900	SPNCRNA.656.1	+	504200	504900	1	700	0
I	5043385	5044768	SPAC22E12.13c.1	-	5043796	5044672	3	846139101	0,1093,1282
I	5045131	5045204	SPATRNAARG.03.1	-	5045131	5045204	1	73	0
I	5056599	5059053	SPAC22E12.19.1	+	5056707	5058693	1	2454	0
I	5058864	5059013	SPNCRNA.91.1	+	5058864	5059013	1	149	0
I	505901	506355	SPAC227.05.1	+	505983	506355	1	454	0
I	5059272	5062056	SPAC2E12.02.1	+	5059474	5061646	2	5301912	0,872
I	506519	507605	SPAC227.06.1	+	506542	507292	1	1086	0
I	5074101	5078206	SPAC1006.04c.1	-	5075135	5077994	1	4105	0
I	50850	51545	SPNCRNA.602.1	-	50850	51545	1	695	0
I	5097689	5098816	SPAC1250.03.1	-	5098186	5098816	3	716,207,42	0,817,1085
I	5097849	5098212	SPAC1250.07.1	-	5097849	5098212	1	363	0
I	5099292	5100214	SPAC1250.02.1	-	5099364	5099986	2	220617	0,305
I	5100147	5104194	SPAC1250.01.1	-	5100375	5104016	2	3777229	0,3818
I	5103585	5104491	SPNCRNA.1046.1	+	5103585	5104491	1	906	0
I	5104251	5106372	SPAC29A4.20.1	-	5104523	5106253	2	3541672	0,449
I	51157	51583	SPNCRNA.19.1	+	51157	51583	1	426	0
I	5119093	5120381	SPNCRNA.1047.1	-	5119093	5120381	1	1288	0
I	5122726	5123353	SPNCRNA.1048.1	-	5122726	5123353	1	627	0
I	5123327	5129129	SPAC29A4.11.1	-	5125928	5128838	1	5802	0
I	5124391	5124613	SPAC29A4.22.1	+	5124391	5124613	1	222	0
I	5124553	5125643	SPAC29A4.12c.1	+	5124779	5125232	1	1090	0
I	5129190	5131963	SPNCRNA.1049.1	+	5129190	5131963	1	2773	0
I	5129263	5131929	SPAC29A4.10.1	-	5130054	5131725	1	2666	0
I	5131869	5133110	SPAC29A4.09.1	-	5132239	5132938	3	772106276	0,819,965
I	5136082	5137380	SPNCRNA.1050.1	-	5136082	5137380	1	1298	0
I	5137313	5138212	SPAC29A4.05.1	-	5137554	5137986	1	899	0
I	513966	517252	SPAC227.11c.1	-	514551	515674	3	11162611719	0,1255,1567
I	5140111	5142317	SPNCRNA.1051.1	-	5140111	5142317	1	2206	0
I	5142406	5143810	SPAC29A4.03c.1	+	5142406	5143224	1	1404	0
I	5143744	5145515	SPAC29A4.02c.1	+	5143817	5145340	2	2901188	0,583
I	5144132	5144206	SPSNORNA.15.1	+	5144132	5144206	1	74	0
I	5148473	5148555	SPSNORNA.16.1	-	5148473	5148555	1	82	0
I	5152527	5153825	SPNCRNA.1053.1	+	5152527	5153825	1	1298	0
I	5156288	5157303	SPNCRNA.1054.1	-	5156288	5157303	1	1015	0
I	5157284	5159163	SPAC26F1.11.1	-	5158022	5158340	1	1879	0
I	5170788	5172112	SPAC26F1.07.1	-	5170882	5171848	1	1324	0
I	5172049	5173481	SPNCRNA.1055.1	-	5172049	5173481	1	1432	0
I	5172195	5172341	SPNCRNA.90.1	+	5172195	5172341	1	146	0
I	5173863	5174644	SPAC26F1.06.1	-	5173971	5174607	1	781	0
I	5174624	5175819	SPAC26F1.05.1	-	5174978	5175326	1	1195	0
I	5174912	5176145	SPNCRNA.1056.1	+	5174912	5176145	1	1233	0
I	5177807	5179736	SPAC26F1.04c.1	+	5178324	5179443	1	1929	0
I	5177860	5178194	SPNCRNA.260.1	+	5177860	5178194	1	334	0
I	5179651	5181308	SPAC26F1.03.1	-	5179830	5181060	1	1657	0
I	5181242	5182731	SPAC26F1.02.1	-	5181981	5182731	3	880,442,11	0,948,1478
I	5191059	5195702	SPAC13D1.01c.1	-	5191143	5195145	1	4643	0
I	519256	520194	SPNCRNA.658.1	+	519256	520194	1	938	0
I	5195710	5199712	SPAC19D5.09c.1	-	5195710	5199712	1	4002	0
I	5200369	5201855	SPNCRNA.1058.1	-	5200369	5201855	1	1486	0
I	5218788	5219613	SPAC19D5.05c.1	-	5218898	5219535	3	134,509,97	0,173,728
I	5219547	5220112	SPAC19D5.11c.1	-	5219634	5220013	2	300216	0,349
I	5220219	5221383	SPAC19D5.06c.1	-	5220219	5221278	1	1164	0
I	5221386	5221719	SPAC19D5.10c.1	-	5221386	5221719	2	255,9	0,324
I	5230241	5230965	SPNCRNA.1062.1	-	5230241	5230965	1	724	0
I	5231139	5232566	SPAC14C4.03.1	+	5231139	5232566	3	157535646	0,197,781
I	5232916	5232987	SPATRNAASP.02.1	-	5232916	5232987	1	71	0
I	5242951	5244114	SPAC14C4.08.1	+	5243052	5243610	1	1163	0
I	526640	528541	SPNCRNA.659.1	+	526640	528541	1	1901	0
I	5266524	5269973	SPNCRNA.1063.1	-	5266524	5269973	1	3449	0
I	5267174	5269088	SPNCRNA.1064.1	+	5267174	5269088	1	1914	0
I	526725	526803	SPSNORNA.02.1	+	526725	526803	1	78	0
I	526936	527036	SPSNORNA.03.1	+	526936	527036	1	100	0
I	5271335	5272361	SPNCRNA.1065.1	-	5271335	5272361	1	1026	0
I	527190	527275	SPSNORNA.04.1	+	527190	527275	1	85	0
I	5272460	5272835	SPAC2H10.04.1	+	5272460	5272835	1	375	0
I	527386	527474	SPSNORNA.05.1	+	527386	527474	1	88	0
I	5276192	5277245	SPNCRNA.1066.1	+	5276192	5277245	1	1053	0
I	527623	527713	SPSNORNA.06.1	+	527623	527713	1	90	0
I	529166	530275	SPAC227.17c.1	-	529800	530166	1	1109	0
I	5292483	5293268	SPNCRNA.1067.1	-	5292483	5293268	1	785	0
I	5292647	5294751	SPAC11E3.06.1	+	5292794	5294344	3	2911691291	0,375,813
I	5309026	5311689	SPNCRNA.1068.1	-	5309026	5311689	1	2663	0
I	5315769	5317020	SPNCRNA.1070.1	+	5315769	5317020	1	1251	0
I	5317423	5317575	SPNCRNA.263.1	+	5317423	5317575	1	152	0
I	5320612	5321854	SPNCRNA.1071.1	-	5320612	5321854	1	1242	0
I	5326839	5328155	SPNCRNA.1072.1	+	5326839	5328155	1	1316	0
I	5328399	5329064	SPNCRNA.525.1	+	5328399	5329064	1	665	0
I	5328561	5329060	SPNCRNA.1073.1	-	5328561	5329060	1	499	0
I	5336680	5340639	SPAP8A3.12c.1	-	5336814	5340639	1	3959	0
I	5340571	5342997	SPNCRNA.1074.1	+	5340571	5342997	1	2426	0
I	5352098	5353742	SPAC4D7.02c.1	-	5352605	5353672	2	1327186	0,1458
I	5353769	5354310	SPNCRNA.1075.1	+	5353769	5354310	1	541	0
I	5353937	5354219	SPAC4D7.15.1	-	5353937	5354219	1	282	0
I	5358773	5359676	SPNCRNA.1076.1	-	5358773	5359676	1	903	0
I	5360568	5361844	SPNCRNA.1077.1	+	5360568	5361844	1	1276	0
I	5363987	5366539	SPAC4D7.08c.1	-	5364359	5365961	2	1977200	0,2352
I	5366222	5366297	SPSNORNA.17.1	-	5366222	5366297	1	75	0
I	5366783	5367314	SPNCRNA.264.1	+	5366783	5367314	1	531	0
I	5369639	5369686	SPSNORNA.18.1	-	5369639	5369686	1	47	0
I	5370227	5372083	SPNCRNA.1078.1	+	5370227	5372083	1	1856	0
I	5375545	5377762	SPAC4D7.13.1	+	5375611	5377699	1	2217	0
I	5377828	5382913	SPAC3G6.01.1	+	5378426	5382650	3	981974238	0,593,847
I	5387558	5387641	SPSNORNA.19.1	+	5387558	5387641	1	83	0
I	5387956	5388056	SPNCRNA.265.1	+	5387956	5388056	1	100	0
I	5389614	5390903	SPNCRNA.1079.1	+	5389614	5390903	1	1289	0
I	5394488	5397413	SPAC3G6.09c.1	-	5394645	5397195	1	2925	0
I	5397346	5398200	SPAC3G6.10c.1	-	5397599	5398079	1	854	0
I	5398265	5398698	SPNCRNA.266.1	+	5398265	5398698	1	433	0
I	5402652	5403044	SPNCRNA.267.1	+	5402652	5403044	1	392	0
I	5411151	5411543	SPNCRNA.268.1	+	5411151	5411543	1	392	0
I	5413727	5414935	SPNCRNA.1080.1	-	5413727	5414935	1	1208	0
I	5413746	5414846	SPNCRNA.269.1	+	5413746	5414846	1	1100	0
I	541575	543735	SPAC2F7.06c.1	-	542036	543557	1	2160	0
I	5416196	5417408	SPAC29B12.05c.1	-	5416350	5417280	1	1212	0
I	5416344	5417406	SPNCRNA.1081.1	+	5416344	5417406	1	1062	0
I	541794	543483	SPNCRNA.552.1	+	541794	543483	1	1689	0
I	541796	544030	SPNCRNA.660.1	+	541796	544030	1	2234	0
I	5423741	5426981	SPNCRNA.1082.1	-	5423741	5426981	1	3240	0
I	5426942	5428044	SPNCRNA.270.1	+	5426942	5428044	1	1102	0
I	5437746	5437828	SPATRNASER.04.1	+	5437746	5437828	1	82	0
I	5438211	5438553	SPAC29B12.12.1	+	5438211	5438553	1	342	0
I	5439646	5442552	SPAC29B12.14c.1	-	5439848	5441621	1	2906	0
I	544126	546240	SPAC2F7.07c.1	-	544416	546240	1	2114	0
I	5441747	5442341	SPNCRNA.28.1	-	5441747	5442341	1	594	0
I	5442520	5442742	SPNCRNA.271.1	+	5442520	5442742	1	222	0
I	5442998	5443180	SPNCRNA.272.1	+	5442998	5443180	1	182	0
I	5444018	5444123	SPNCRNA.273.1	+	5444018	5444123	1	105	0
I	5454228	5454498	SPNCRNA.21.1	-	5454228	5454498	1	270	0
I	5459202	5460261	SPNCRNA.1084.1	+	5459202	5460261	1	1059	0
I	5459452	5459867	SPNCRNA.274.1	+	5459452	5459867	1	415	0
I	5462117	5463989	SPAC1039.07c.1	-	5462442	5463789	1	1872	0
I	5462489	5463916	SPNCRNA.1085.1	+	5462489	5463916	1	1427	0
I	5463862	5465172	SPAC1039.08.1	+	5464247	5465060	1	1310	0
I	5463939	5466070	SPNCRNA.1086.1	-	5463939	5466070	1	2131	0
I	5465092	5465740	SPNCRNA.275.1	+	5465092	5465740	1	648	0
I	5465376	5468649	SPAC1039.09.1	+	5466777	5468520	1	3273	0
I	546663	548562	SPAC2F7.08c.1	-	546663	548562	1	1899	0
I	5471269	5474941	SPAC1039.11c.1	-	5471560	5474548	1	3672	0
I	5472728	5475847	SPNCRNA.1087.1	+	5472728	5475847	1	3119	0
I	5474746	5475378	SPNCRNA.276.1	-	5474746	5475378	1	632	0
I	5475432	5475848	SPNCRNA.30.1	+	5475432	5475848	1	416	0
I	5478302	5478903	SPNCRNA.1088.1	-	5478302	5478903	1	601	0
I	5478366	5479836	SPNCRNA.1089.1	+	5478366	5479836	1	1470	0
I	5478401	5479098	SPNCRNA.277.1	+	5478401	5479098	1	697	0
I	5481584	5482068	SPNCRNA.278.1	+	5481584	5482068	1	484	0
I	5482661	5482877	SPAC922.09.1	+	5482661	5482877	1	216	0
I	548567	549658	SPNCRNA.661.1	+	548567	549658	1	1091	0
I	5487524	5488928	SPNCRNA.1090.1	+	5487524	5488928	1	1404	0
I	5492627	5494800	SPNCRNA.1091.1	-	5492627	5494800	1	2173	0
I	5495269	5496597	SPNCRNA.1092.1	+	5495269	5496597	1	1328	0
I	5496843	5497448	SPAC869.09.1	-	5497040	5497391	1	605	0
I	5496941	5497837	SPNCRNA.1093.1	+	5496941	5497837	1	896	0
I	5497917	5499280	SPAC869.08.1	-	5498272	5498965	1	1363	0
I	5499767	5501236	SPAC869.07c.1	+	5499781	5501092	1	1469	0
I	5502559	5503291	SPAC869.06c.1	+	5502574	5503186	1	732	0
I	5504487	5505476	SPNCRNA.279.1	+	5504487	5505476	1	989	0
I	5505582	5508782	SPAC869.05c.1	+	5505899	5508422	1	3200	0
I	5511136	5512369	SPAC869.04.1	-	5511136	5512369	1	1233	0
I	5512756	5514865	SPAC869.03c.1	+	5512756	5514742	1	2109	0
I	5516039	5516265	SPNCRNA.280.1	+	5516039	5516265	1	226	0
I	5516330	5516951	SPNCRNA.281.1	+	5516330	5516951	1	621	0
I	5517027	5517494	SPNCRNA.282.1	+	5517027	5517494	1	467	0
I	5521274	5523181	SPAC869.01.1	-	5521356	5523108	1	1907	0
I	5524888	5525299	SPNCRNA.283.1	-	5524888	5525299	1	411	0
I	5525498	5525873	SPNCRNA.284.1	+	5525498	5525873	1	375	0
I	5527461	5528959	SPAC186.01.1	+	5527691	5528672	1	1498	0
I	5529850	5531144	SPAC186.02c.1	-	5529961	5530960	1	1294	0
I	5531266	5531539	SPNCRNA.96.1	+	5531266	5531539	1	273	0
I	5535060	5536432	SPAC186.03.1	+	5535197	5536280	1	1372	0
I	5538479	5539516	SPAC186.04c.1	-	5538573	5539101	1	1037	0
I	5542289	5543031	SPAC186.06.1	+	5542418	5542973	1	742	0
I	5543363	5543438	SPNCRNA.310.1	+	5543363	5543438	1	75	0
I	5545614	5546613	SPAC186.07c.1	-	5545614	5546613	1	999	0
I	5546204	5546648	SPNCRNA.61.1	+	5546204	5546648	1	444	0
I	5548883	5550012	SPAC186.08c.1	-	5548883	5550012	2	936,57	0,1072
I	5552810	5554529	SPAC186.09.1	+	5552810	5554529	1	1719	0
I	555299	556109	SPNCRNA.154.1	+	555299	556109	1	810	0
I	5555715	5556768	SPAC750.01.1	+	5555790	5556768	1	1053	0
I	5560188	5561901	SPAC750.02c.1	-	5560188	5561646	1	1713	0
I	5562607	5563045	SPAC750.03c.1	-	5562607	5563045	1	438	0
I	5564210	5564651	SPAC750.04c.1	-	5564210	5564651	1	441	0
I	5565880	5567337	SPAC750.05c.1	-	5566205	5567240	1	1457	0
I	5568902	5569803	SPAC750.06c.1	-	5568902	5569803	2	353490	0,411
I	5575192	5575564	SPAC750.07c.1	-	5575192	5575564	1	372	0
I	5578446	5579133	SPAC750.08c.1	-	5578446	5579133	1	687	0
I	5725	6331	SPAC212.10.1	-	5725	6331	1	606	0
I	577198	578150	SPNCRNA.155.1	+	577198	578150	1	952	0
I	58276	59105	SPAC977.13c.1	-	58276	59105	1	829	0
I	584477	587656	SPNCRNA.662.1	-	584477	587656	1	3179	0
I	585354	587495	SPAC13A11.06.1	+	585596	587312	1	2141	0
I	590783	592586	SPNCRNA.663.1	-	590783	592586	1	1803	0
I	597664	598076	SPNCRNA.664.1	-	597664	598076	1	412	0
I	597722	598290	SPNCRNA.156.1	+	597722	598290	1	568	0
I	598130	599439	SPNCRNA.665.1	-	598130	599439	1	1309	0
I	604127	606113	SPNCRNA.666.1	+	604127	606113	1	1986	0
I	604311	607742	SPAC3H8.09c.1	-	604495	606849	3	6483412305	0,703,1126
I	608405	608831	SPNCRNA.667.1	-	608405	608831	1	426	0
I	633147	633474	SPAC1F3.08c.1	-	633147	633474	1	327	0
I	643959	644683	SPNCRNA.670.1	-	643959	644683	1	724	0
I	64558	66980	SPAC977.16c.1	-	64903	66679	1	2422	0
I	649448	649889	SPAC1D4.07c.1	-	649448	649889	1	441	0
I	656075	660381	SPAC1D4.11c.1	-	656759	658832	1	4306	0
I	660083	664108	SPNCRNA.671.1	+	660083	664108	1	4025	0
I	660777	664180	SPNCRNA.672.1	-	660777	664180	1	3403	0
I	663143	663352	SPNCRNA.79.1	-	663143	663352	1	209	0
I	664676	665246	SPNCRNA.673.1	-	664676	665246	1	570	0
I	667909	669749	SPNCRNA.674.1	-	667909	669749	1	1840	0
I	678570	680480	SPNCRNA.675.1	-	678570	680480	1	1910	0
I	678584	679442	SPNCRNA.158.1	+	678584	679442	1	858	0
I	679061	681890	SPAC22F3.12c.1	+	680175	681621	1	2829	0
I	697190	703040	SPAC22F3.05c.1	+	697290	698068	7	165,55,73,146,81,3526,1533	0,210,305,430,614,737,4317
I	697194	697871	SPNCRNA.676.1	-	697194	697871	1	677	0
I	697959	702755	SPAC22F3.04.1	-	698032	702755	7	2.18219e+21	0,263,520,924,1188,1450,4643
I	703074	703147	SPATRNAVAL.02.1	-	703074	703147	1	73	0
I	705041	708014	SPAC22F3.02.1	-	706843	707473	1	2973	0
I	71029	71470	SPNCRNA.137.1	+	71029	71470	1	441	0
I	712216	714070	SPAC1296.03c.1	-	712490	714014	1	1854	0
I	718118	718190	SPATRNAGLU.01.1	-	718118	718190	1	72	0
I	71981	72380	SPNCRNA.37.1	-	71981	72380	1	399	0
I	729849	732457	SPNCRNA.677.1	-	729849	732457	1	2608	0
I	731932	732759	SPAC22G7.03.1	+	731937	732648	1	827	0
I	736519	738893	SPNCRNA.678.1	-	736519	738893	1	2374	0
I	74451	76721	SPAPJ695.02.1	-	75697	75910	1	2270	0
I	7618	9274	SPAC212.09c.1	+	7618	9274	1	1656	0
I	762719	764810	SPNCRNA.679.1	+	762719	764810	1	2091	0
I	765525	767503	SPNCRNA.680.1	+	765525	767503	1	1978	0
I	772649	774027	SPAC4G8.06c.1	-	772672	773929	1	1378	0
I	773999	776062	SPAC4G8.07c.1	-	773999	776013	5	24249838100422	0,155,453,1414,1641
I	77479	78066	SPAPJ695.01c.1	-	77577	77931	1	587	0
I	776183	777243	SPNCRNA.681.1	+	776183	777243	1	1060	0
I	776271	777066	SPNCRNA.159.1	+	776271	777066	3	268170238	0,317,557
I	777176	778498	SPAC4G8.08.1	+	777258	778283	3	111394608	0,161,714
I	777799	778374	SPNCRNA.682.1	-	777799	778374	1	575	0
I	778430	781324	SPAC4G8.09.1	+	778531	781156	1	2894	0
I	778804	781335	SPNCRNA.683.1	-	778804	781335	1	2531	0
I	781346	783634	SPAC4G8.11c.1	-	782141	783144	3	990267832	0,1091,1456
I	790208	790793	SPNCRNA.684.1	+	790208	790793	1	585	0
I	790797	791645	SPNCRNA.685.1	+	790797	791645	1	848	0
I	79208	79317	SPNCRNA.138.1	+	79208	79317	1	109	0
I	792377	794001	SPNCRNA.686.1	+	792377	794001	1	1624	0
I	81467	82345	SPNCRNA.603.1	-	81467	82345	1	878	0
I	815387	817984	SPAC2G11.05c.1	-	815514	817620	1	2597	0
I	818361	819834	SPNCRNA.688.1	-	818361	819834	1	1473	0
I	819767	821920	SPAC2G11.07c.1	-	820162	821704	3	1238,74,544	0,1277,1609
I	826312	828123	SPAC2G11.10c.1	-	826537	828011	3	1108214221	0,1152,1590
I	826578	828205	SPNCRNA.689.1	+	826578	828205	1	1627	0
I	82745	84786	SPAC1F8.01.1	+	82935	84603	1	2041	0
I	829233	831663	SPNCRNA.690.1	+	829233	831663	1	2430	0
I	836306	837262	SPNCRNA.691.1	-	836306	837262	1	956	0
I	843101	844243	SPNCRNA.692.1	-	843101	844243	1	1142	0
I	843196	844165	SPAC521.02.1	+	843232	844084	1	969	0
I	848370	849443	SPNCRNA.693.1	+	848370	849443	1	1073	0
I	85565	86324	SPAC1F8.02c.1	-	85597	86278	1	759	0
I	872756	873497	SPNCRNA.694.1	-	872756	873497	1	741	0
I	88200	90300	SPAC1F8.03c.1	-	88366	90259	1	2100	0
I	90680	91753	SPNCRNA.604.1	-	90680	91753	1	1073	0
I	906862	908571	SPNCRNA.695.1	-	906862	908571	1	1709	0
I	90867	91753	SPNCRNA.139.1	+	90867	91753	1	886	0
I	90948	94038	SPNCRNA.605.1	+	90948	94038	1	3090	0
I	912229	912396	SPRRNA.12.1	-	912229	912396	1	167	0
I	913656	914031	SPAC1687.07.1	+	913656	914031	1	375	0
I	914327	914618	SPAC1687.08.1	+	914327	914618	1	291	0
I	919782	920837	SPNCRNA.696.1	-	919782	920837	1	1055	0
I	92386	93931	SPAC1F8.04c.1	-	92479	93871	1	1545	0
I	929155	929654	SPAC1687.23c.1	-	929158	929473	1	499	0
I	934055	934503	SPNCRNA.160.1	+	934055	934503	1	448	0
I	934664	934738	SPATRNAALA.01.1	-	934664	934738	1	74	0
I	938310	939831	SPAC1687.19c.1	-	938447	939759	3	648574202	0,691,1319
I	938389	939912	SPNCRNA.697.1	+	938389	939912	1	1523	0
I	939769	941944	SPAC1687.20c.1	-	939870	941889	1	2175	0
I	946891	947942	SPNCRNA.698.1	-	946891	947942	1	1051	0
I	947875	948800	SPAC222.03c.1	-	947963	948581	2	257320	0,605
I	948714	949365	SPNCRNA.699.1	+	948714	949365	1	651	0
I	951027	952560	SPNCRNA.700.1	+	951027	952560	1	1533	0
I	95158	96525	SPNCRNA.606.1	-	95158	96525	1	1367	0
I	957182	957254	SPATRNAGLU.02.1	+	957182	957254	1	72	0
I	959369	959556	SPSNRNA.02.1	-	959369	959556	1	187	0
I	95960	96966	SPAC1F8.05.1	+	95999	96548	1	1006	0
I	972676	973994	SPNCRNA.701.1	+	972676	973994	1	1318	0
I	977074	977568	SPNCRNA.50.1	-	977074	977568	1	494	0
I	977708	978637	SPAC222.15.1	+	977708	978637	5	49,54,102,141,305	0,95,196,340,624
I	987569	987825	SPSNRNA.03.1	-	987569	987825	1	256	0
I	990024	991617	SPNCRNA.702.1	-	990024	991617	1	1593	0
I	99045	101140	SPNCRNA.607.1	-	99045	101140	1	2095	0
I	998044	998413	SPNCRNA.163.1	+	998044	998413	1	369	0
I	99870	101431	SPAC1F8.06.1	+	100010	101168	1	1561	0
II	1000713	1002162	SPBC146.02.1	+	1001010	1001802	1	1449	0
II	1000804	1001832	SPNCRNA.1403.1	-	1000804	1001832	1	1028	0
II	1010238	1011278	SPNCRNA.1404.1	+	1010238	1011278	1	1040	0
II	1013314	1014054	SPNCRNA.1405.1	-	1013314	1014054	1	740	0
II	1020183	1021749	SPBC146.11c.1	-	1020295	1021333	1	1566	0
II	102508	102673	SPNCRNA.290.1	+	102508	102673	1	165	0
II	103164	104528	SPNCRNA.291.1	-	103164	104528	1	1364	0
II	1032323	1032771	SPNCRNA.42.1	+	1032323	1032771	1	448	0
II	1032556	1033776	SPBC337.02c.1	-	1032856	1033776	1	1220	0
II	1034933	1036091	SPNCRNA.1406.1	-	1034933	1036091	1	1158	0
II	1035537	1036864	SPBC337.03.1	+	1035537	1036864	4	148101195720	0,196,365,607
II	1037076	1038385	SPBC337.04.1	+	1037076	1038385	2	706536	0,773
II	1047237	1048402	SPBC337.09.1	+	1047534	1048120	3	439,91,460	0,550,705
II	1048424	1049492	SPNCRNA.1407.1	+	1048424	1049492	1	1068	0
II	10568	11351	SPBC1348.03.1	+	10568	11009	1	783	0
II	1058346	1059126	SPBC337.16.1	+	1058346	1059067	2	605120	0,660
II	1063804	1066718	SPNCRNA.1408.1	-	1063804	1066718	1	2914	0
II	107513	108774	SPNCRNA.1309.1	-	107513	108774	1	1261	0
II	1076178	1079027	SPBC1734.10c.1	-	1077438	1078918	2	1788580	0,2269
II	1078082	1078182	SPNCRNA.498.1	-	1078082	1078182	1	100	0
II	1079940	1081342	SPNCRNA.1409.1	-	1079940	1081342	1	1402	0
II	1080091	1080445	SPNCRNA.337.1	+	1080091	1080445	1	354	0
II	1086636	1087413	SPNCRNA.567.1	-	1086636	1087413	1	777	0
II	109404	109905	SPNCRNA.1310.1	-	109404	109905	1	501	0
II	1094759	1096264	SPNCRNA.1410.1	-	1094759	1096264	1	1505	0
II	1095162	1098228	SPBC1709.01.1	+	1095357	1098185	2	2195824	0,2242
II	1104133	1104949	SPNCRNA.1411.1	+	1104133	1104949	1	816	0
II	1104932	1105933	SPNCRNA.338.1	+	1104932	1105933	1	1001	0
II	1106346	1108511	SPBC1709.05.1	+	1106455	1108297	1	2165	0
II	1110896	1112356	SPNCRNA.1412.1	-	1110896	1112356	1	1460	0
II	1127971	1130513	SPNCRNA.1413.1	+	1127971	1130513	1	2542	0
II	1136740	1137967	SPNCRNA.1414.1	+	1136740	1137967	1	1227	0
II	114091	114583	SPNCRNA.292.1	+	114091	114583	1	492	0
II	1150423	1150863	SPNCRNA.1415.1	-	1150423	1150863	1	440	0
II	1154472	1155774	SPNCRNA.1416.1	+	1154472	1155774	1	1302	0
II	1157103	1158424	SPBC409.10.1	+	1157117	1158017	1	1321	0
II	1157157	1158382	SPNCRNA.568.1	-	1157157	1158382	1	1225	0
II	1158532	1160295	SPBC409.11.1	+	1158593	1160255	1	1763	0
II	1158657	1160848	SPNCRNA.1417.1	-	1158657	1160848	1	2191	0
II	1160892	1160994	SPBTRNAARG.05.1	-	1160892	1160994	2	36,36	0,66
II	1166825	1167420	SPNCRNA.1418.1	+	1166825	1167420	1	595	0
II	1168818	1169357	SPNCRNA.1419.1	+	1168818	1169357	1	539	0
II	117891	121286	SPBC359.04c.1	-	118251	119328	3	2126396776	0,2182,2619
II	1182609	1184243	SPNCRNA.569.1	-	1182609	1184243	1	1634	0
II	1184426	1185324	SPBC4.01.1	+	1184426	1185324	2	689,58	0,840
II	1185475	1187542	SPBC4.02c.1	-	1185616	1187324	4	1165,109,76,323	0,1262,1611,1744
II	1187645	1190936	SPBC4.03c.1	-	1188136	1190812	1	3291	0
II	1199881	1200066	SPRRNA.27.1	+	1199881	1200066	1	185	0
II	1200563	1203137	SPBC725.01.1	+	1200660	1201974	1	2574	0
II	1202210	1202992	SPNCRNA.1420.1	-	1202210	1202992	1	782	0
II	1203083	1206773	SPBC725.02.1	+	1203756	1204644	1	3690	0
II	120576	121643	SPNCRNA.293.1	+	120576	121643	1	1067	0
II	1212518	1216202	SPNCRNA.1421.1	+	1212518	1216202	1	3684	0
II	1212689	1216671	SPBC725.06c.1	-	1212822	1215921	1	3982	0
II	12175	12750	SPBC1348.04.1	+	12175	12613	1	575	0
II	1224482	1224560	SPNCRNA.342.1	+	1224482	1224560	1	78	0
II	1227761	1228307	SPBC725.12.1	+	1227761	1228307	3	115169142	0,164,404
II	1229152	1230915	SPBC725.14.1	+	1229290	1230793	1	1763	0
II	1231040	1232358	SPBC725.15.1	+	1231078	1231726	1	1318	0
II	1232587	1235587	SPBC725.16.1	+	1233334	1235375	2	9731900	0,1100
II	123703	126325	SPNCRNA.1312.1	-	123703	126325	1	2622	0
II	1240146	1241248	SPNCRNA.1422.1	-	1240146	1241248	1	1102	0
II	1247410	1248188	SPBC651.06.1	+	1247483	1248188	1	778	0
II	1248595	1249996	SPBC651.07.1	+	1248595	1249617	4	11,230,83,862	0,96,395,539
II	1264113	1264873	SPNCRNA.1423.1	-	1264113	1264873	1	760	0
II	1264951	1266264	SPNCRNA.1424.1	-	1264951	1266264	1	1313	0
II	1266596	1267929	SPNCRNA.1425.1	-	1266596	1267929	1	1333	0
II	1268092	1268452	SPBC31A8.02.1	+	1268092	1268452	1	360	0
II	127310	127803	SPNCRNA.294.1	+	127310	127803	1	493	0
II	127381	128570	SPNCRNA.1313.1	-	127381	128570	1	1189	0
II	1274838	1277059	SPBC3D6.04c.1	-	1274978	1277059	2	2059112	0,2109
II	127936	128726	SPNCRNA.1314.1	+	127936	128726	1	790	0
II	1281400	1282254	SPNCRNA.1426.1	-	1281400	1282254	1	854	0
II	128659	129742	SPBC359.06.1	+	128824	129598	1	1083	0
II	1287405	1290094	SPBC3D6.10.1	+	1287405	1289014	2	7931859	0,830
II	1296671	1297662	SPBC30B4.09.1	-	1297077	1297233	1	991	0
II	1296789	1297523	SPNCRNA.570.1	-	1296789	1297523	1	734	0
II	1296914	1297260	SPBC3D6.16.1	+	1296914	1297260	2	49239	0,107
II	1297698	1298710	SPNCRNA.1427.1	+	1297698	1298710	1	1012	0
II	1301569	1304114	SPNCRNA.1428.1	+	1301569	1304114	1	2545	0
II	1308633	1308745	SPSNORNA.21.1	+	1308633	1308745	1	112	0
II	1312124	1313175	SPNCRNA.346.1	+	1312124	1313175	1	1051	0
II	1318124	1318834	SPNCRNA.1429.1	+	1318124	1318834	1	710	0
II	1320594	1323215	SPBC30B4.08.1	+	1320691	1321833	4	2251084061682	0,302,471,939
II	1329045	1329760	SPNCRNA.15.1	-	1329045	1329760	1	715	0
II	1330704	1331267	SPNCRNA.1430.1	-	1330704	1331267	1	563	0
II	1330992	1334064	SPBC27B12.06.1	+	1331065	1333822	1	3072	0
II	1333997	1335608	SPBC27B12.07.1	+	1334111	1335162	3	498325610	0,609,1001
II	1354305	1355953	SPNCRNA.1431.1	+	1354305	1355953	1	1648	0
II	13571	15378	SPBC1348.05.1	+	13571	15029	1	1807	0
II	1363470	1364267	SPNCRNA.1432.1	-	1363470	1364267	1	797	0
II	1372487	1375055	SPBC8D2.07c.1	-	1372609	1374935	4	1851,88,97,228	0,2050,2196,2340
II	1374988	1375756	SPBC8D2.09c.1	-	1375312	1375721	2	432263	0,505
II	1375888	1379351	SPBC8D2.10c.1	-	1376340	1378365	3	1846,96,1128	0,1925,2335
II	1378385	1380215	SPBC8D2.11.1	+	1378385	1380215	1	1830	0
II	1378509	1378770	SPBC8D2.23.1	+	1378509	1378770	1	261	0
II	1382001	1385138	SPBC8D2.13.1	+	1382123	1383706	5	197,68,328,737,1580	0,239,396,769,1557
II	1393453	1395312	SPBC8D2.19.1	+	1393453	1395312	3	147,75,1458	0,193,401
II	1402443	1402541	SPBTRNALEU.05.1	-	1402443	1402541	2	44,38	0,60
II	140473	141087	SPNCRNA.296.1	+	140473	141087	1	614	0
II	1406384	1406824	SPRRNA.32.1	+	1406384	1406824	1	440	0
II	141284	142180	SPNCRNA.1315.1	-	141284	142180	1	896	0
II	1412909	1414047	SPBC17A3.06.1	+	1413054	1414047	1	1138	0
II	1414253	1416156	SPBC17A3.07.1	+	1414495	1415945	2	2941554	0,349
II	141434	141927	SPNCRNA.297.1	+	141434	141927	1	493	0
II	1427985	1428304	SPNCRNA.348.1	+	1427985	1428304	1	319	0
II	1437139	1437858	SPNCRNA.1433.1	-	1437139	1437858	1	719	0
II	1448814	1450155	SPBP22H7.09c.1	-	1448814	1450155	3	789134307	0,842,1034
II	1449899	1450935	SPNCRNA.1434.1	+	1449899	1450935	1	1036	0
II	1450370	1451104	SPBC32H8.01c.1	-	1450370	1451104	3	424,50,90	0,516,644
II	1451330	1454730	SPBC32H8.02c.1	-	1452186	1453434	1	3400	0
II	1455027	1455333	SPBC32H8.15.1	+	1455027	1455333	1	306	0
II	145700	148807	SPNCRNA.1316.1	-	145700	148807	1	3107	0
II	1461718	1463083	SPBC32H8.06.1	+	1461718	1463083	3	57110985	0,116,380
II	1465810	1467431	SPBC32H8.08c.1	-	1465810	1467431	3	225920121	0,327,1500
II	1467901	1468396	SPNCRNA.1436.1	-	1467901	1468396	1	495	0
II	1468184	1468406	SPSNORNA.47.1	-	1468184	1468406	1	222	0
II	1473124	1475285	SPBC32H8.11.1	+	1473193	1474747	1	2161	0
II	1489807	1490536	SPNCRNA.1437.1	+	1489807	1490536	1	729	0
II	1493051	1495570	SPBC11B10.05c.1	-	1493068	1494553	1	2519	0
II	1497663	1498394	SPNCRNA.24.1	-	1497663	1498394	1	731	0
II	1499985	1500798	SPNCRNA.1438.1	-	1499985	1500798	1	813	0
II	1503952	1504024	SPBTRNATHR.06.1	+	1503952	1504024	1	72	0
II	1504331	1504498	SPRRNA.33.1	+	1504331	1504498	1	167	0
II	1509702	1510279	SPNCRNA.351.1	+	1509702	1510279	1	577	0
II	1516680	1517574	SPBC83.04.1	+	1516726	1517204	2	154673	0,221
II	1517507	1520101	SPBC83.05.1	+	1517667	1519989	1	2594	0
II	1525576	1527155	SPBC83.09c.1	-	1525692	1526965	2	1225308	0,1271
II	1525952	1527083	SPNCRNA.1439.1	+	1525952	1527083	1	1131	0
II	1531915	1532931	SPNCRNA.1440.1	-	1531915	1532931	1	1016	0
II	1541451	1541903	SPBC83.19c.1	-	1541451	1541811	1	452	0
II	1542195	1542364	SPNCRNA.352.1	+	1542195	1542364	1	169	0
II	1543491	1544843	SPBC83.18c.1	-	1543894	1544766	2	1174125	0,1227
II	154520	156642	SPNCRNA.1318.1	-	154520	156642	1	2122	0
II	1545427	1546254	SPNCRNA.1441.1	+	1545427	1546254	1	827	0
II	1553508	1554385	SPNCRNA.1442.1	+	1553508	1554385	1	877	0
II	1554842	1557638	SPNCRNA.1443.1	+	1554842	1557638	1	2796	0
II	155750	159570	SPBC1683.08.1	+	157554	159228	1	3820	0
II	1557725	1558047	SPNCRNA.1444.1	-	1557725	1558047	1	322	0
II	1558178	1558705	SPBC29B5.03c.1	-	1558239	1558620	1	527	0
II	1561333	1562309	SPNCRNA.1445.1	+	1561333	1562309	1	976	0
II	1563858	1566027	SPBC27.03.1	+	1563901	1565770	1	2169	0
II	1569745	1570072	SPBC27.05.1	+	1569745	1570072	1	327	0
II	1572365	1574375	SPNCRNA.1448.1	+	1572365	1574375	1	2010	0
II	1573271	1573581	SPNCRNA.358.1	+	1573271	1573581	1	310	0
II	1577406	1578049	SPBC28F2.04c.1	-	1577406	1578009	2	530,74	0,569
II	1578051	1579102	SPBC28F2.05c.1	-	1578174	1579005	1	1051	0
II	1578092	1579286	SPNCRNA.1449.1	+	1578092	1579286	1	1194	0
II	1579041	1580296	SPBC28F2.06c.1	-	1579126	1579948	1	1255	0
II	1587683	1588850	SPNCRNA.1450.1	+	1587683	1588850	1	1167	0
II	1597995	1598069	SPBTRNAASN.01.1	-	1597995	1598069	1	74	0
II	15980	16592	SPBC1348.06c.1	-	15980	16592	1	612	0
II	1598074	1598155	SPBTRNAMET.05.1	-	1598074	1598155	2	36,38	0,43
II	1598510	1598594	SPBTRNATYR.02.1	+	1598510	1598594	2	38,36	0,48
II	1598744	1598845	SPBTRNALEU.06.1	-	1598744	1598845	2	44,38	0,63
II	1599336	1599407	SPBTRNAGLY.07.1	-	1599336	1599407	1	71	0
II	1599705	1599788	SPBTRNALYS.07.1	+	1599705	1599788	2	39,37	0,46
II	1600085	1600159	SPBTRNAILE.05.1	+	1600085	1600159	1	74	0
II	1600232	1600306	SPBTRNAALA.08.1	-	1600232	1600306	1	74	0
II	1600966	1601049	SPBTRNAVAL.05.1	-	1600966	1601049	2	36,38	0,45
II	1601490	1601562	SPBTRNAGLU.06.1	-	1601490	1601562	1	72	0
II	1602187	1602260	SPBTRNAARG.06.1	+	1602187	1602260	1	73	0
II	1602346	1602417	SPBTRNAASP.05.1	+	1602346	1602417	1	71	0
II	1602772	1604997	SPNCRNA.359.1	+	1602772	1604997	1	2225	0
II	1606371	1609066	SPNCRNA.360.1	+	1606371	1609066	1	2695	0
II	1609702	1610790	SPNCRNA.361.1	+	1609702	1610790	1	1088	0
II	1611105	1612940	SPNCRNA.362.1	+	1611105	1612940	1	1835	0
II	1613126	1613220	SPNCRNA.363.1	+	1613126	1613220	1	94	0
II	1613276	1614347	SPNCRNA.364.1	+	1613276	1614347	1	1071	0
II	1614383	1615655	SPNCRNA.365.1	+	1614383	1615655	1	1272	0
II	1617398	1617921	SPNCRNA.366.1	+	1617398	1617921	1	523	0
II	1618292	1618366	SPBTRNAILE.06.1	+	1618292	1618366	1	74	0
II	1618439	1618513	SPBTRNAALA.09.1	-	1618439	1618513	1	74	0
II	1619173	1619256	SPBTRNAVAL.06.1	-	1619173	1619256	1	83	0
II	1619339	1619803	SPNCRNA.367.1	+	1619339	1619803	1	464	0
II	1619807	1620391	SPNCRNA.368.1	+	1619807	1620391	1	584	0
II	1620798	1620937	SPNCRNA.369.1	+	1620798	1620937	1	139	0
II	1625749	1626227	SPNCRNA.370.1	+	1625749	1626227	1	478	0
II	1629158	1629241	SPBTRNAVAL.07.1	+	1629158	1629241	2	38,36	0,47
II	1629901	1629975	SPBTRNAALA.10.1	+	1629901	1629975	1	74	0
II	1630048	1630122	SPBTRNAILE.07.1	-	1630048	1630122	1	74	0
II	1636392	1636776	SPNCRNA.371.1	+	1636392	1636776	1	384	0
II	163688	163891	SPNCRNA.100.1	+	163688	163891	1	203	0
II	1637170	1639664	SPNCRNA.372.1	+	1637170	1639664	1	2494	0
II	1640113	1641543	SPNCRNA.373.1	+	1640113	1641543	1	1430	0
II	1643848	1643932	SPBTRNATYR.03.1	+	1643848	1643932	2	38,36	0,48
II	1644082	1644183	SPBTRNALEU.07.1	-	1644082	1644183	2	44,38	0,63
II	1644674	1644745	SPBTRNAGLY.08.1	-	1644674	1644745	1	71	0
II	1645043	1645126	SPBTRNALYS.08.1	+	1645043	1645126	2	39,36	0,47
II	1645423	1645497	SPBTRNAILE.08.1	+	1645423	1645497	1	74	0
II	1645570	1645644	SPBTRNAALA.11.1	-	1645570	1645644	1	74	0
II	1646304	1646387	SPBTRNAVAL.08.1	-	1646304	1646387	2	36,38	0,45
II	1646828	1646900	SPBTRNAGLU.07.1	-	1646828	1646900	1	72	0
II	1647282	1647355	SPBTRNAARG.07.1	-	1647282	1647355	1	73	0
II	1647477	1647927	SPNCRNA.374.1	+	1647477	1647927	1	450	0
II	1648947	1649671	SPBC21B10.12.1	-	1649037	1649671	2	525114	0,610
II	1649989	1650658	SPBC21B10.11.1	-	1650288	1650550	2	458168	0,501
II	1662890	1664360	SPBC21B10.05c.1	+	1662946	1663891	1	1470	0
II	1670519	1675238	SPNCRNA.1451.1	-	1670519	1675238	1	4719	0
II	1676351	1678652	SPBC19C2.04c.1	-	1676523	1677576	1	2301	0
II	1680946	1681089	SPNCRNA.108.1	+	1680946	1681089	1	143	0
II	1685385	1685983	SPNCRNA.1452.1	+	1685385	1685983	1	598	0
II	1686426	1687926	SPNCRNA.1453.1	+	1686426	1687926	1	1500	0
II	1695092	1696776	SPNCRNA.1454.1	-	1695092	1696776	1	1684	0
II	1706940	1708944	SPBC2F12.14c.1	+	1706974	1708881	2	4911181	0,823
II	1707600	1707681	SPSNORNA.22.1	+	1707600	1707681	1	81	0
II	1712243	1712906	SPNCRNA.1455.1	+	1712243	1712906	1	663	0
II	1712840	1714938	SPBC2F12.12c.1	+	1713102	1714886	5	388,252,93,453,682	0,434,741,880,1416
II	1713001	1714577	SPNCRNA.1456.1	-	1713001	1714577	1	1576	0
II	1721072	1721574	SPNCRNA.376.1	+	1721072	1721574	1	502	0
II	1722230	1724450	SPBC2F12.09c.1	+	1723012	1724080	1	2220	0
II	172377	174315	SPBC1198.01.1	+	172990	174262	1	1938	0
II	1724846	1726443	SPBC2F12.08c.1	+	1724846	1726055	1	1597	0
II	1726631	1727577	SPBC2F12.07c.1	+	1726676	1727438	1	946	0
II	172715	174355	SPNCRNA.1320.1	-	172715	174355	1	1640	0
II	1728748	1733339	SPBC2F12.05c.1	+	1728833	1733137	4	143,42,173,3862	0,208,311,729
II	1737873	1739062	SPNCRNA.1458.1	-	1737873	1739062	1	1189	0
II	1742554	1744043	SPNCRNA.1459.1	-	1742554	1744043	1	1489	0
II	1743967	1744798	SPBC1D7.04.1	-	1744112	1744712	1	831	0
II	1749533	1749589	SPNCRNA.116.1	+	1749533	1749589	1	56	0
II	1749625	1751043	SPNCRNA.1460.1	-	1749625	1751043	1	1418	0
II	1752099	1755619	SPBC1D7.02c.1	+	1753588	1755286	1	3520	0
II	1755900	1757290	SPBC1D7.01.1	-	1756509	1757096	4	142407167203	0,365,923,1187
II	1756121	1756222	SPSNORNA.23.1	-	1756121	1756222	1	101	0
II	1771649	1773433	SPNCRNA.1462.1	-	1771649	1773433	1	1784	0
II	1774859	1774932	SPBTRNATRP.03.1	+	1774859	1774932	1	73	0
II	177550	178869	SPNCRNA.1321.1	+	177550	178869	1	1319	0
II	1776954	1778833	SPNCRNA.1463.1	-	1776954	1778833	1	1879	0
II	1777374	1777788	SPNCRNA.17.1	-	1777374	1777788	1	414	0
II	1782329	1785933	SPBC18H10.07.1	+	1783258	1784006	2	9832548	0,1056
II	1786279	1789197	SPBC18H10.09.1	+	1786331	1787917	3	13511301555	0,198,1363
II	1786608	1789159	SPBC18H10.10c.1	-	1788046	1789046	3	1828249374	0,1883,2177
II	1790905	1792295	SPBC18H10.12c.1	-	1791018	1792215	2	740209	0,1181
II	1791742	1791820	SPSNORNA.24.1	-	1791742	1791820	1	78	0
II	1793808	1794860	SPNCRNA.1465.1	-	1793808	1794860	1	1052	0
II	1804694	1805092	SPNCRNA.377.1	+	1804694	1805092	1	398	0
II	180993	181064	SPBTRNAGLY.03.1	-	180993	181064	1	71	0
II	1810675	1812297	SPNCRNA.1466.1	-	1810675	1812297	1	1622	0
II	1812747	1816780	SPBC9B6.02c.1	-	1812747	1816749	1	4033	0
II	181430	182194	SPNCRNA.1322.1	-	181430	182194	1	764	0
II	1825786	1825858	SPBTRNAPRO.04.1	-	1825786	1825858	1	72	0
II	1828225	1831124	SPNCRNA.1467.1	+	1828225	1831124	1	2899	0
II	1831375	1834883	SPBC9B6.11c.1	-	1833166	1834804	2	3074305	0,3203
II	1834617	1835635	SPNCRNA.1468.1	+	1834617	1835635	1	1018	0
II	1834887	1835295	SPBC28E12.01c.1	-	1834887	1835295	1	408	0
II	1836326	1838630	SPBC28E12.02.1	+	1836326	1838318	1	2304	0
II	184590	186786	SPBC1198.07c.1	-	185288	186675	2	1945193	0,2003
II	185041	186959	SPNCRNA.1323.1	+	185041	186959	1	1918	0
II	1863283	1864186	SPBC3H7.11.1	-	1863367	1864186	2	543288	0,615
II	1864776	1865654	SPBC3H7.10.1	-	1864776	1865608	2	555241	0,637
II	1868935	1870314	SPBC3H7.08c.1	+	1869251	1869843	3	385,52,713	0,454,666
II	1869992	1871082	SPNCRNA.1470.1	-	1869992	1871082	1	1090	0
II	1870280	1871749	SPBC3H7.07c.1	+	1870333	1871301	2	851547	0,922
II	1871695	1873777	SPNCRNA.1471.1	-	1871695	1873777	1	2082	0
II	1871846	1873320	SPBC3H7.06c.1	+	1871846	1873320	2	3651039	0,435
II	1873512	1875657	SPBC3H7.05c.1	+	1874458	1875532	1	2145	0
II	1877220	1877292	SPBTRNAPRO.05.1	+	1877220	1877292	1	72	0
II	1877294	1878080	SPNCRNA.1472.1	+	1877294	1878080	1	786	0
II	188788	191818	SPBC1198.10c.1	-	190206	191676	3	2429127330	0,2499,2700
II	1888086	1891429	SPNCRNA.1473.1	+	1888086	1891429	1	3343	0
II	1891571	1892648	SPNCRNA.1474.1	+	1891571	1892648	1	1077	0
II	1892115	1892775	SPNCRNA.379.1	+	1892115	1892775	1	660	0
II	1894349	1905532	SPBP16F5.03c.1	-	1894432	1905532	1	11183	0
II	1904422	1905778	SPNCRNA.1475.1	+	1904422	1905778	1	1356	0
II	1905711	1907025	SPBP16F5.04.1	+	1905798	1906744	3	276,58,535	0,672,779
II	1914033	1915317	SPNCRNA.380.1	+	1914033	1915317	1	1284	0
II	1917405	1917613	SPSNORNA.40.1	+	1917405	1917613	1	208	0
II	191751	193850	SPBC1198.11c.1	-	191935	193542	4	395,327,1125,41	0,446,814,2058
II	1928622	1930472	SPNCRNA.1476.1	-	1928622	1930472	1	1850	0
II	1928802	1929870	SPBC16E9.08.1	+	1928802	1929870	1	1068	0
II	1930399	1931531	SPBC16E9.09c.1	-	1930511	1931324	4	141192214420	0,182,435,712
II	19394	20606	SPBC1348.07.1	+	19640	20383	2	664498	0,714
II	1940058	1941445	SPNCRNA.1478.1	+	1940058	1941445	1	1387	0
II	1940769	1942390	SPNCRNA.1479.1	-	1940769	1942390	1	1621	0
II	194677	195989	SPBC1198.12.1	+	194677	195989	2	1211145	0,167
II	1951397	1952828	SPBC16E9.20.1	+	1951791	1952361	1	1431	0
II	1952766	1955702	SPNCRNA.1481.1	+	1952766	1955702	1	2936	0
II	1953037	1954662	SPNCRNA.571.1	+	1953037	1954662	1	1625	0
II	1953418	1954793	SPBC16E9.17c.1	-	1953418	1954712	2	747543	0,832
II	1957285	1957449	SPSNORNA.39.1	-	1957285	1957449	1	164	0
II	1963881	1964560	SPNCRNA.382.1	+	1963881	1964560	1	679	0
II	1965389	1969387	SPBC1E8.04.1	+	1965389	1969387	1	3998	0
II	1969855	1970296	SPNCRNA.383.1	+	1969855	1970296	1	441	0
II	1973308	1974265	SPBC1A4.01.1	+	1973366	1974065	3	225327276	0,296,681
II	197659	199474	SPBC1198.14c.1	-	198098	199142	1	1815	0
II	1981438	1982213	SPNCRNA.384.1	+	1981438	1982213	1	775	0
II	1988497	1990473	SPBC1A4.07c.1	-	1988985	1990352	2	1537383	0,1593
II	1990415	1992652	SPBC1A4.08c.1	-	1990768	1992463	3	1841,74,214	0,1911,2023
II	1993790	1998937	SPBC1A4.09.1	+	1993926	1995969	1	5147	0
II	199408	200559	SPNCRNA.1325.1	-	199408	200559	1	1151	0
II	1999816	2001036	SPBP23A10.02.1	+	1999897	2000376	2	269871	0,349
II	2000972	2003598	SPBP23A10.04.1	+	2001134	2003269	3	1398620519	0,1442,2107
II	201347	201812	SPNCRNA.1326.1	-	201347	201812	1	465	0
II	2015415	2016296	SPBP23A10.09.1	+	2015499	2016108	1	881	0
II	2016394	2018936	SPBP23A10.10.1	+	2016394	2018794	2	252367	0,175
II	2021268	2022034	SPNCRNA.1482.1	+	2021268	2022034	1	766	0
II	2022110	2022686	SPNCRNA.385.1	+	2022110	2022686	1	576	0
II	2032159	2032233	SPBTRNAASN.02.1	+	2032159	2032233	1	74	0
II	2032409	2032528	SPRRNA.39.1	+	2032409	2032528	1	119	0
II	2035905	2036579	SPBP23A10.16.1	+	2036099	2036579	1	674	0
II	2037091	2037394	SPBC29A3.21.1	+	2037091	2037394	1	303	0
II	2037986	2040717	SPBC29A3.01.1	+	2037986	2040701	1	2731	0
II	2040732	2042218	SPBC29A3.02c.1	-	2040892	2042146	1	1486	0
II	2042151	2044042	SPBC29A3.03c.1	-	2042506	2043763	2	909922	0,969
II	2044061	2045213	SPNCRNA.1483.1	+	2044061	2045213	1	1152	0
II	2044410	2044505	SPSNORNA.25.1	+	2044410	2044505	1	95	0
II	2051834	2051899	SPNCRNA.386.1	+	2051834	2051899	1	65	0
II	2052483	2054098	SPBC29A3.08.1	+	2053032	2053632	2	1117466	0,1149
II	205582	206910	SPNCRNA.1327.1	-	205582	206910	1	1328	0
II	2060777	2062436	SPNCRNA.1484.1	+	2060777	2062436	1	1659	0
II	2062471	2066165	SPBC29A3.14c.1	-	2062471	2066110	16	163,97,167,250,214,149,185,170,117,270,71,393,263,119,81,313	0,205,345,551,838,1093,1288,1514,1735,1892,2201,2311,2740,3054,3244,3381
II	2069486	2069557	SPBTRNAGLY.09.1	+	2069486	2069557	1	71	0
II	2084399	2084672	SPNCRNA.110.1	+	2084399	2084672	1	273	0
II	2089943	2090327	SPBC18E5.14c.1	-	2089943	2090327	1	384	0
II	2090556	2090943	SPBC18E5.09c.1	-	2090556	2090943	1	387	0
II	2091790	2092358	SPNCRNA.1485.1	-	2091790	2092358	1	568	0
II	2091891	2092234	SPBC18E5.15.1	+	2091891	2092234	1	343	0
II	2092550	2095975	SPBC18E5.11c.1	-	2094392	2095848	2	2853481	0,2944
II	2096189	2096847	SPNCRNA.536.1	+	2096189	2096847	1	658	0
II	2096446	2098039	SPBC18E5.12c.1	-	2096527	2098036	1	1593	0
II	209755	211172	SPBC660.08.1	+	209801	211172	2	701251	0,166
II	210125	211344	SPNCRNA.1328.1	-	210125	211344	1	1219	0
II	2104178	2105331	SPNCRNA.387.1	+	2104178	2105331	1	1153	0
II	21059	21754	SPNCRNA.287.1	-	21059	21754	1	695	0
II	2110484	2113453	SPBC23G7.08c.1	-	2110806	2112894	1	2969	0
II	2114218	2114347	SPBC23G7.17c.1	-	2114218	2114347	1	129	0
II	2114448	2115027	SPBC23G7.09.1	+	2114481	2115027	1	579	0
II	211510	212091	SPBC660.09.1	+	211510	211858	1	581	0
II	2115591	2117167	SPNCRNA.388.1	+	2115591	2117167	1	1576	0
II	2120230	2121050	SPBC23G7.11.1	+	2120285	2120927	1	820	0
II	2121214	2121358	SPSNORNA.44.1	+	2121214	2121358	1	144	0
II	2123086	2125438	SPBC23G7.13c.1	-	2123259	2125254	1	2352	0
II	212374	214899	SPBC660.10.1	+	212374	214899	2	1172325	0,200
II	2129802	2130589	SPNCRNA.389.1	+	2129802	2130589	1	787	0
II	2132585	2132714	SPBC1711.01c.1	-	2132585	2132714	1	129	0
II	2132848	2133394	SPBC1711.02.1	+	2132848	2133394	1	546	0
II	2134980	2136530	SPNCRNA.390.1	+	2134980	2136530	1	1550	0
II	2137041	2137124	SPNCRNA.391.1	+	2137041	2137124	1	83	0
II	2137528	2139540	SPNCRNA.1489.1	-	2137528	2139540	1	2012	0
II	2145544	2145829	SPNCRNA.1490.1	-	2145544	2145829	1	285	0
II	215126	216901	SPBC660.11.1	+	215143	216496	3	2292021041	0,479,734
II	2157542	2159733	SPBC1711.12.1	+	2157624	2159676	1	2191	0
II	2159852	2161291	SPBC1711.13.1	+	2159916	2161236	1	1439	0
II	2161541	2162200	SPBC1711.14.1	+	2161541	2162133	2	205405	0,254
II	2162781	2163089	SPNCRNA.392.1	+	2162781	2163089	1	308	0
II	2163935	2167085	SPNCRNA.1491.1	-	2163935	2167085	1	3150	0
II	2171607	2173722	SPBC17G9.03c.1	-	2171856	2173632	1	2115	0
II	2173655	2176522	SPBC17G9.04c.1	-	2174100	2176128	1	2867	0
II	2178058	2179406	SPNCRNA.1492.1	-	2178058	2179406	1	1348	0
II	217880	218882	SPNCRNA.1329.1	+	217880	218882	1	1002	0
II	2186473	2186908	SPNCRNA.38.1	-	2186473	2186908	1	435	0
II	2186563	2187406	SPNCRNA.1493.1	-	2186563	2187406	1	843	0
II	2190644	2194621	SPBC17G9.11c.1	-	2190873	2194431	1	3977	0
II	2194558	2196446	SPBC17G9.12c.1	-	2195199	2196024	1	1888	0
II	2197753	2198140	SPNCRNA.393.1	+	2197753	2198140	1	387	0
II	2198476	2199461	SPNCRNA.394.1	+	2198476	2199461	1	985	0
II	2202999	2204221	SPBC14C8.01c.1	-	2203315	2204221	1	1222	0
II	2204840	2205295	SPNCRNA.68.1	-	2204840	2205295	1	455	0
II	22110	23529	SPBC1348.08c.1	-	22278	23529	1	1419	0
II	2211797	2213495	SPBC14C8.05c.1	-	2212019	2213372	1	1698	0
II	2211868	2213695	SPNCRNA.1494.1	+	2211868	2213695	1	1827	0
II	2218539	2219196	SPBC14C8.19.1	-	2218539	2219196	4	287,62,55,103	0,334,453,554
II	2219429	2220322	SPBC14C8.09c.1	-	2219429	2220322	1	893	0
II	2224154	2224828	SPNCRNA.1496.1	-	2224154	2224828	1	674	0
II	2229636	2230156	SPNCRNA.1497.1	-	2229636	2230156	1	520	0
II	224296	228689	SPBC660.15.1	+	224328	226239	5	79,441,41,164,3182	0,127,640,1002,1211
II	2243873	2245657	SPNCRNA.1498.1	+	2243873	2245657	1	1784	0
II	2261370	2261489	SPRRNA.34.1	-	2261370	2261489	1	119	0
II	2265285	2265818	SPNCRNA.1499.1	+	2265285	2265818	1	533	0
II	2266027	2266169	SPSNORNA.36.1	+	2266027	2266169	1	142	0
II	2266289	2267665	SPNCRNA.1500.1	+	2266289	2267665	1	1376	0
II	227192	227448	SPNCRNA.1330.1	-	227192	227448	1	256	0
II	227371	227760	SPNCRNA.62.1	+	227371	227760	1	389	0
II	2277214	2279624	SPBC16H5.11c.1	+	2277214	2279247	3	2501499566	0,299,1844
II	227846	228309	SPNCRNA.102.1	+	227846	228309	1	463	0
II	2300660	2303704	SPNCRNA.1501.1	+	2300660	2303704	1	3044	0
II	2301758	2303132	SPNCRNA.538.1	+	2301758	2303132	1	1374	0
II	2319291	2319363	SPBTRNAPRO.06.1	+	2319291	2319363	1	72	0
II	2319347	2319746	SPNCRNA.1502.1	+	2319347	2319746	1	399	0
II	2322704	2322851	SPRRNA.35.1	+	2322704	2322851	1	147	0
II	2322710	2324873	SPBC24C6.03.1	+	2323023	2324301	1	2163	0
II	2327471	2330741	SPNCRNA.1503.1	-	2327471	2330741	1	3270	0
II	2328686	2329696	SPNCRNA.1504.1	+	2328686	2329696	1	1010	0
II	233266	234309	SPBC660.17c.1	-	233633	234248	2	804143	0,900
II	2335175	2337787	SPBC24C6.09c.1	-	2335261	2337739	1	2612	0
II	2339629	2340238	SPNCRNA.1506.1	+	2339629	2340238	1	609	0
II	234476	239592	SPBC31E1.01c.1	-	234502	239513	2	474999	0,117
II	2349141	2350982	SPBC19G7.04.1	+	2349592	2350766	3	513648595	0,555,1246
II	2357532	2361156	SPBC19G7.06.1	+	2359428	2361092	5	329,1467,147,84,1156	0,480,2014,2312,2468
II	2366961	2367928	SPNCRNA.1507.1	-	2366961	2367928	1	967	0
II	2375702	2377311	SPBC19G7.14c.1	-	2375739	2377064	3	745,73,702	0,785,907
II	2380549	2382306	SPNCRNA.1508.1	-	2380549	2382306	1	1757	0
II	2392160	2393113	SPBC36B7.06c.1	-	2392550	2393103	3	444268144	0,498,809
II	2393471	2395636	SPBC36B7.08c.1	-	2394574	2395561	5	351041516111148	0,97,1231,1816,2017
II	2395572	2396485	SPNCRNA.1509.1	-	2395572	2396485	1	913	0
II	2401677	2403432	SPBP18G5.02.1	+	2401752	2403394	3	560767295	0,597,1460
II	2406800	2408273	SPBC1921.02.1	+	2406831	2408102	2	1341289	0,184
II	2410995	2411452	SPBC1921.04c.1	-	2411050	2411404	1	457	0
II	2411189	2411361	SPSNORNA.34.1	+	2411189	2411361	1	172	0
II	2411416	2412526	SPNCRNA.1510.1	-	2411416	2412526	1	1110	0
II	2417500	2418682	SPNCRNA.1512.1	+	2417500	2418682	1	1182	0
II	2431126	2431835	SPNCRNA.572.1	-	2431126	2431835	1	709	0
II	2432072	2433891	SPBC21D10.08c.1	+	2432141	2433025	2	1551614	0,205
II	2433864	2434169	SPNCRNA.107.1	-	2433864	2434169	1	305	0
II	2434302	2434374	SPBTRNAMET.06.1	-	2434302	2434374	1	72	0
II	2434421	2438482	SPBC21D10.06c.1	+	2435635	2438482	1	4061	0
II	2438664	2439695	SPNCRNA.1513.1	-	2438664	2439695	1	1031	0
II	2442699	2442852	SPRRNA.40.1	-	2442699	2442852	1	153	0
II	2444130	2444830	SPNCRNA.1514.1	-	2444130	2444830	1	700	0
II	2447903	2448048	SPSNORNA.38.1	-	2447903	2448048	1	145	0
II	2448091	2450963	SPBC12C2.11.1	-	2448490	2450854	3	2414,71,114	0,2619,2758
II	2449773	2450647	SPNCRNA.1515.1	+	2449773	2450647	1	874	0
II	2461902	2463113	SPNCRNA.1516.1	+	2461902	2463113	1	1211	0
II	2464268	2466047	SPBC12C2.06.1	-	2464346	2465858	1	1779	0
II	2465984	2468003	SPNCRNA.1518.1	-	2465984	2468003	1	2019	0
II	2471720	2472056	SPBC12C2.14c.1	-	2471720	2472056	1	336	0
II	2472438	2472537	SPNCRNA.397.1	+	2472438	2472537	1	99	0
II	2485483	2486494	SPNCRNA.1519.1	-	2485483	2486494	1	1011	0
II	2485487	2486126	SPNCRNA.08.1	-	2485487	2486126	1	639	0
II	2485499	2486230	SPNCRNA.09.1	-	2485499	2486230	1	731	0
II	2488244	2488936	SPBC557.02c.1	-	2488324	2488936	1	692	0
II	2488717	2491866	SPNCRNA.1520.1	+	2488717	2491866	1	3149	0
II	2489018	2491122	SPBC557.03c.1	-	2489033	2490828	3	1029618152	0,1204,1952
II	2491066	2492032	SPNCRNA.1521.1	-	2491066	2492032	1	966	0
II	2491213	2491518	SPNCRNA.398.1	+	2491213	2491518	1	305	0
II	24915	25626	SPBC1348.09.1	+	24915	25626	1	711	0
II	2495196	2497598	SPBC557.05.1	+	2495223	2496610	3	5425731202	0,584,1200
II	2499100	2499784	SPNCRNA.1522.1	-	2499100	2499784	1	684	0
II	2515000	2516186	SPNCRNA.1523.1	-	2515000	2516186	1	1186	0
II	2516124	2518792	SPBC365.12c.1	-	2516248	2518303	1	2668	0
II	2526378	2529466	SPNCRNA.1524.1	-	2526378	2529466	1	3088	0
II	2527460	2528721	SPNCRNA.399.1	+	2527460	2528721	1	1261	0
II	2528769	2529528	SPNCRNA.400.1	+	2528769	2529528	1	759	0
II	2529640	2532214	SPBC365.16.1	+	2530987	2531821	1	2574	0
II	2529698	2530876	SPNCRNA.135.1	+	2529698	2530876	1	1178	0
II	253147	253984	SPBC800.02.1	+	253147	253984	2	84675	0,162
II	2536163	2538254	SPBC29A10.02.1	+	2536220	2538027	3	2873441357	0,335,734
II	2543248	2544500	SPNCRNA.1525.1	-	2543248	2544500	1	1252	0
II	2545089	2546359	SPNCRNA.1526.1	-	2545089	2546359	1	1270	0
II	254616	257138	SPNCRNA.1331.1	-	254616	257138	1	2522	0
II	254714	257138	SPBC800.03.1	+	254821	256885	1	2424	0
II	2552925	2553784	SPNCRNA.1527.1	+	2552925	2553784	1	859	0
II	2554008	2555531	SPBC29A10.08.1	+	2554046	2555426	1	1523	0
II	2554176	2557200	SPBC29A10.09c.1	-	2555663	2556947	1	3024	0
II	2555738	2556917	SPNCRNA.1528.1	+	2555738	2556917	1	1179	0
II	2567829	2568256	SPNCRNA.25.1	-	2567829	2568256	1	427	0
II	2568892	2570993	SPBC29A10.14.1	+	2568937	2570810	5	101,188,97,1250,278	0,144,384,533,1823
II	2571144	2573169	SPNCRNA.1529.1	-	2571144	2573169	1	2025	0
II	257453	257525	SPBTRNAGLN.01.1	+	257453	257525	1	72	0
II	2576375	2576448	SPBTRNAPHE.03.1	-	2576375	2576448	1	73	0
II	257907	257979	SPBTRNAGLN.02.1	-	257907	257979	1	72	0
II	2580399	2581182	SPNCRNA.1530.1	-	2580399	2581182	1	783	0
II	2580437	2581248	SPNCRNA.401.1	+	2580437	2581248	1	811	0
II	2584027	2586436	SPNCRNA.1531.1	+	2584027	2586436	1	2409	0
II	2584402	2585684	SPNCRNA.402.1	+	2584402	2585684	1	1282	0
II	258847	258919	SPBTRNAGLN.03.1	-	258847	258919	1	72	0
II	2600789	2602096	SPNCRNA.1533.1	-	2600789	2602096	1	1307	0
II	2601157	2601839	SPNCRNA.1534.1	+	2601157	2601839	1	682	0
II	2605103	2605868	SPNCRNA.1535.1	+	2605103	2605868	1	765	0
II	2610659	2611329	SPNCRNA.1536.1	-	2610659	2611329	1	670	0
II	26154	28576	SPBC1348.10c.1	-	26286	28372	2	2012157	0,265
II	2616236	2617444	SPBC25B2.10.1	+	2616520	2617444	1	1208	0
II	2617861	2619476	SPBC25B2.11.1	+	2617861	2619336	3	1191140201	0,1227,1414
II	262124	263868	SPNCRNA.1332.1	-	262124	263868	1	1744	0
II	2630833	2632018	SPBC6B1.03c.1	-	2631041	2631967	3	561370147	0,602,1038
II	2637175	2640172	SPNCRNA.1538.1	+	2637175	2640172	1	2997	0
II	2640871	2641783	SPNCRNA.403.1	+	2640871	2641783	1	912	0
II	2641750	2643255	SPNCRNA.1539.1	-	2641750	2643255	1	1505	0
II	2647668	2648597	SPBC6B1.12c.1	-	2648069	2648464	2	648213	0,716
II	2659604	2660100	SPNCRNA.1540.1	-	2659604	2660100	1	496	0
II	2661607	2662564	SPNCRNA.1541.1	+	2661607	2662564	1	957	0
II	2661641	2662360	SPNCRNA.540.1	+	2661641	2662360	1	719	0
II	2662487	2664652	SPBC3E7.04c.1	-	2662487	2664652	7	163,63,738,137,114,201,177	0,209,350,1150,1340,1548,1988
II	2662499	2665063	SPNCRNA.1542.1	+	2662499	2665063	1	2564	0
II	2672989	2676799	SPBC3E7.08c.1	-	2673018	2676357	1	3810	0
II	2677218	2678765	SPNCRNA.1543.1	-	2677218	2678765	1	1547	0
II	2681999	2683902	SPBC3E7.12c.1	-	2682389	2683760	1	1903	0
II	2683835	2684834	SPBC3E7.13c.1	-	2684011	2684750	2	800150	0,849
II	2683993	2685662	SPNCRNA.1544.1	+	2683993	2685662	1	1669	0
II	2719715	2720622	SPNCRNA.1545.1	+	2719715	2720622	1	907	0
II	2720539	2722662	SPBC4F6.16c.1	-	2720993	2722397	2	511905	0,218
II	2720647	2720733	SPSNORNA.26.1	-	2720647	2720733	1	86	0
II	2728309	2728918	SPNCRNA.405.1	+	2728309	2728918	1	609	0
II	2732337	2733015	SPBC336.16.1	-	2732700	2732916	1	678	0
II	2738940	2739592	SPNCRNA.406.1	+	2738940	2739592	1	652	0
II	2745479	2748552	SPBC336.05c.1	-	2747190	2748327	1	3073	0
II	274711	275245	SPNCRNA.1333.1	+	274711	275245	1	534	0
II	274744	275832	SPNCRNA.299.1	+	274744	275832	1	1088	0
II	2750683	2754656	SPNCRNA.1546.1	-	2750683	2754656	1	3973	0
II	275387	277238	SPBC800.11.1	+	275906	277076	1	1851	0
II	2755391	2759388	SPBC336.08.1	+	2755504	2756278	3	2673363217	0,314,780
II	2756275	2758582	SPBC336.09c.1	-	2756304	2757982	2	1532711	0,1596
II	2758644	2759294	SPBC336.10c.1	-	2758760	2759270	1	650	0
II	2759471	2761211	SPBC336.11.1	+	2759638	2761165	1	1740	0
II	2764130	2764352	SPNCRNA.1547.1	+	2764130	2764352	1	222	0
II	2768256	2768335	SPBTRNALEU.08.1	-	2768256	2768335	1	79	0
II	2772767	2774447	SPBC685.02.1	+	2772883	2774447	4	279,65,777,225	0,334,549,1455
II	2774696	2776063	SPBC685.03.1	+	2774696	2776055	1	1367	0
II	2781106	2781888	SPBC685.08.1	+	2781315	2781655	2	212524	0,258
II	2781830	2783676	SPBC685.09.1	+	2781957	2783565	1	1846	0
II	278234	279160	SPNCRNA.1335.1	+	278234	279160	1	926	0
II	2789714	2790257	SPNCRNA.1549.1	+	2789714	2790257	1	543	0
II	2790374	2790446	SPBTRNATHR.07.1	-	2790374	2790446	1	72	0
II	2795239	2797769	SPBC32F12.07c.1	-	2796315	2797338	1	2530	0
II	2797704	2798808	SPBC32F12.08c.1	-	2798006	2798507	1	1104	0
II	2804336	2804580	SPNCRNA.39.1	-	2804336	2804580	1	244	0
II	2804368	2807566	SPBC32F12.17.1	-	2805084	2805417	1	3198	0
II	2805983	2807593	SPNCRNA.1550.1	+	2805983	2807593	1	1610	0
II	2807533	2809051	SPBC32F12.11.1	+	2807636	2808647	1	1518	0
II	2809082	2809873	SPNCRNA.1551.1	+	2809082	2809873	1	791	0
II	2809508	2810368	SPNCRNA.1552.1	-	2809508	2810368	1	860	0
II	2819556	2819634	SPNCRNA.408.1	+	2819556	2819634	1	78	0
II	2826630	2828674	SPNCRNA.1553.1	+	2826630	2828674	1	2044	0
II	2826641	2827645	SPNCRNA.1554.1	-	2826641	2827645	1	1004	0
II	2827280	2827631	SPNCRNA.26.1	+	2827280	2827631	1	351	0
II	2849543	2850810	SPBP19A11.02c.1	-	2849579	2850314	1	1267	0
II	285388	285459	SPBTRNAGLY.04.1	-	285388	285459	1	71	0
II	285675	285749	SPBTRNAALA.07.1	+	285675	285749	1	74	0
II	285908	288246	SPBC1773.03c.1	-	286038	287418	1	2338	0
II	28623	28796	SPNCRNA.11.1	+	28623	28796	1	173	0
II	2862805	2863810	SPNCRNA.1555.1	+	2862805	2863810	1	1005	0
II	2863117	2863575	SPNCRNA.1556.1	-	2863117	2863575	1	458	0
II	2863783	2868411	SPBP19A11.06.1	+	2863814	2868356	1	4628	0
II	2866327	2868277	SPNCRNA.1557.1	-	2866327	2868277	1	1950	0
II	287589	288017	SPNCRNA.300.1	-	287589	288017	1	428	0
II	2884155	2887140	SPNCRNA.1558.1	-	2884155	2887140	1	2985	0
II	2885635	2886536	SPNCRNA.1559.1	+	2885635	2886536	1	901	0
II	2886000	2886371	SPNCRNA.410.1	+	2886000	2886371	1	371	0
II	2888191	2892009	SPNCRNA.1560.1	-	2888191	2892009	1	3818	0
II	2888449	2889979	SPBP4H10.09.1	+	2888449	2889736	1	1530	0
II	2890644	2891823	SPBP4H10.10.1	+	2890644	2891823	1	1179	0
II	2895854	2896587	SPBP4H10.12.1	+	2895854	2896587	3	9,459,72	0,146,661
II	2897045	2897633	SPBP4H10.13.1	+	2897099	2897531	1	588	0
II	2901108	2902665	SPNCRNA.1561.1	+	2901108	2902665	1	1557	0
II	2901242	2902541	SPNCRNA.411.1	+	2901242	2902541	1	1299	0
II	2901346	2902607	SPNCRNA.1562.1	-	2901346	2902607	1	1261	0
II	2905961	2907243	SPBP4H10.16c.1	-	2906236	2907124	1	1282	0
II	2907177	2908713	SPBP4H10.17c.1	-	2907372	2908398	1	1536	0
II	2921149	2923544	SPBC1703.04.1	+	2921240	2923535	4	1631381731681	0,291,494,714
II	2925351	2927873	SPNCRNA.1563.1	-	2925351	2927873	1	2522	0
II	2925470	2927790	SPBC1703.06.1	+	2925511	2927554	2	1502116	0,204
II	2934726	2935979	SPNCRNA.1564.1	-	2934726	2935979	1	1253	0
II	2939714	2939786	SPBTRNAPRO.07.1	+	2939714	2939786	1	72	0
II	2947352	2948814	SPNCRNA.1565.1	-	2947352	2948814	1	1462	0
II	2950351	2952480	SPNCRNA.1566.1	-	2950351	2952480	1	2129	0
II	2951070	2952556	SPBC2A9.03.1	+	2951159	2952497	2	1261303	0,183
II	2955429	2957212	SPBC2A9.05c.1	-	2956468	2957189	2	1475247	0,1536
II	2958978	2961056	SPNCRNA.1567.1	+	2958978	2961056	1	2078	0
II	2960366	2961154	SPBC2A9.14.1	-	2960602	2960910	2	336345	0,443
II	2975052	2976498	SPNCRNA.573.1	-	2975052	2976498	1	1446	0
II	2976694	2978838	SPBC2D10.06.1	+	2977165	2978584	1	2144	0
II	2978735	2979469	SPBC2D10.07c.1	-	2978905	2979469	3	389127128	0,436,606
II	2979660	2980446	SPBC2D10.08c.1	-	2979660	2980446	1	786	0
II	2983906	2983962	SPNCRNA.118.1	+	2983906	2983962	1	56	0
II	2988591	2990276	SPBC2D10.13.1	+	2988673	2990187	2	3341310	0,375
II	2996488	2997159	SPNCRNA.1569.1	-	2996488	2997159	1	671	0
II	3001073	3003417	SPNCRNA.1570.1	-	3001073	3003417	1	2344	0
II	3003350	3003938	SPBC2D10.19c.1	-	3003385	3003837	3	187,52,215	0,267,373
II	3007916	3011223	SPNCRNA.1571.1	-	3007916	3011223	1	3307	0
II	3008601	3011490	SPNCRNA.1572.1	+	3008601	3011490	1	2889	0
II	3011490	3015079	SPBC15D4.02.1	+	3012933	3014577	1	3589	0
II	3020204	3020353	SPSNRNA.01.1	+	3020204	3020353	1	149	0
II	3020525	3022271	SPNCRNA.1573.1	-	3020525	3022271	1	1746	0
II	3023342	3025621	SPBC15D4.07c.1	-	3023512	3025621	1	2279	0
II	3025658	3026075	SPBC15D4.08c.1	-	3025658	3026075	1	417	0
II	3026240	3028547	SPNCRNA.1574.1	+	3026240	3028547	1	2307	0
II	3028684	3030224	SPBC15D4.10c.1	-	3028704	3030192	2	1931287	0,253
II	303	693	SPBC1348.15.1	-	303	693	1	390	0
II	3030370	3031431	SPBC15D4.11c.1	-	3030370	3031341	3	351154377	0,389,684
II	3034426	3035817	SPNCRNA.1577.1	-	3034426	3035817	1	1391	0
II	3041444	3043524	SPBC13E7.02.1	+	3041801	3043403	1	2080	0
II	3047865	3050504	SPBC13E7.05.1	+	3047979	3050477	2	2328261	0,2378
II	3050552	3051959	SPBC13E7.06.1	+	3050579	3051575	1	1407	0
II	3055288	3058803	SPBC13E7.09.1	+	3055474	3056456	4	985759874728	0,1037,1834,2787
II	3060446	3061331	SPNCRNA.1578.1	-	3060446	3061331	1	885	0
II	307041	309627	SPNCRNA.1338.1	-	307041	309627	1	2586	0
II	308159	310467	SPBC1773.12.1	+	308159	309944	1	2308	0
II	3083316	3084348	SPBC30D10.09c.1	+	3083316	3084106	3	167122607	0,210,425
II	3089272	3089634	SPBC30D10.21.1	+	3089272	3089634	2	61242	0,120
II	3089996	3090914	SPBC30D10.05c.1	+	3089996	3090740	1	918	0
II	3090850	3091859	SPNCRNA.1579.1	+	3090850	3091859	1	1009	0
II	3096967	3097078	SPRRNA.54.1	-	3096967	3097078	1	111	0
II	3103108	3104941	SPBC1778.04.1	+	3103283	3104851	4	640133722195	0,691,870,1638
II	3120576	3122246	SPNCRNA.1580.1	+	3120576	3122246	1	1670	0
II	3120770	3122439	SPBC4C3.08.1	-	3121285	3122404	1	1669	0
II	3120778	3120982	SPNCRNA.23.1	+	3120778	3120982	1	204	0
II	3126887	3127616	SPNCRNA.412.1	+	3126887	3127616	1	729	0
II	3150074	3150475	SPNCRNA.413.1	+	3150074	3150475	1	401	0
II	3150257	3152904	SPNCRNA.1582.1	-	3150257	3152904	1	2647	0
II	3150466	3153000	SPNCRNA.541.1	-	3150466	3153000	1	2534	0
II	3153260	3153382	SPNCRNA.414.1	+	3153260	3153382	1	122	0
II	3154094	3156370	SPNCRNA.1583.1	-	3154094	3156370	1	2276	0
II	3154683	3155288	SPNCRNA.415.1	+	3154683	3155288	1	605	0
II	3161727	3162941	SPBC609.02.1	+	3161822	3162869	1	1214	0
II	3161771	3163104	SPNCRNA.1584.1	-	3161771	3163104	1	1333	0
II	3166405	3167382	SPNCRNA.1585.1	-	3166405	3167382	1	977	0
II	3171565	3171645	SPRRNA.41.1	-	3171565	3171645	1	80	0
II	3172322	3172696	SPBC776.01.1	+	3172322	3172561	2	27294	0,80
II	3172780	3172923	SPSNORNA.45.1	+	3172780	3172923	1	143	0
II	317693	320922	SPBC1773.16c.1	-	318692	320480	2	3081105	0,3124
II	3178325	3181780	SPNCRNA.1586.1	-	3178325	3181780	1	3455	0
II	3183641	3186195	SPBC776.06c.1	-	3183675	3185602	2	1302369	0,185
II	320609	321519	SPNCRNA.301.1	+	320609	321519	1	910	0
II	3209138	3209217	SPBTRNALEU.09.1	-	3209138	3209217	1	79	0
II	3215871	3219354	SPBC21.03c.1	-	3217984	3218947	6	2553,25,11,249,162,137	0,2595,2769,2832,3136,3346
II	3216183	3219312	SPBC21.02.1	+	3216268	3217913	3	206,61,2753	0,258,376
II	3222452	3224035	SPNCRNA.1587.1	+	3222452	3224035	1	1583	0
II	3226566	3228745	SPBC21.07c.1	-	3226819	3228287	2	7051392	0,787
II	3228619	3231394	SPBC19F8.01c.1	-	3228879	3230492	6	541,113,512,94,82,1107	0,583,735,1398,1542,1668
II	3228912	3230660	SPNCRNA.1588.1	+	3228912	3230660	1	1748	0
II	3234547	3235830	SPNCRNA.1589.1	+	3234547	3235830	1	1283	0
II	3236866	3236986	SPSNRNA.05.1	+	3236866	3236986	1	120	0
II	3239037	3242818	SPBC19F8.06c.1	-	3239222	3240947	1	3781	0
II	3241811	3242520	SPNCRNA.417.1	+	3241811	3242520	1	709	0
II	3248811	3250002	SPBC25H2.15.1	-	3248811	3250002	1	1191	0
II	3250198	3251263	SPBC25H2.14.1	-	3250198	3251247	6	134,80,361,4,78,67	0,227,368,795,870,998
II	3260871	3263087	SPBC25H2.12c.1	+	3260918	3262804	3	814241502	0,123,714
II	326234	326305	SPBTRNAGLY.05.1	+	326234	326305	1	71	0
II	3263082	3266875	SPBC25H2.11c.1	+	3263376	3266718	9	868,200,39,102,139,1244,144,215,479	0,909,1163,1254,1398,1584,2867,3054,3314
II	326651	326724	SPBTRNAARG.04.1	-	326651	326724	1	73	0
II	3267014	3268221	SPBC25H2.10c.1	+	3267014	3268221	6	7.21112e+16	0,179,340,582,837,1033
II	3282948	3284010	SPNCRNA.1590.1	-	3282948	3284010	1	1062	0
II	3295175	3295428	SPNCRNA.04.1	-	3295175	3295428	1	253	0
II	329975	330635	SPNCRNA.1339.1	+	329975	330635	1	660	0
II	3303291	3304037	SPBC20F10.10.1	+	3303305	3304037	1	746	0
II	3304726	3306572	SPBC17D11.01.1	+	3304836	3306253	3	138,55,1499	0,218,347
II	3313371	3313800	SPNCRNA.36.1	+	3313371	3313800	1	429	0
II	33230	34780	SPBC1348.11.1	+	33230	34780	2	3721173	0,377
II	332493	333584	SPNCRNA.1340.1	+	332493	333584	1	1091	0
II	3329496	3330909	SPNCRNA.1592.1	-	3329496	3330909	1	1413	0
II	3333405	3334893	SPNCRNA.1593.1	-	3333405	3334893	1	1488	0
II	3333460	3335085	SPBC17D1.04.1	+	3333602	3334355	1	1625	0
II	3335018	3337149	SPBC17D1.05.1	+	3335109	3336216	1	2131	0
II	3336676	3337137	SPNCRNA.112.1	+	3336676	3337137	1	461	0
II	3338603	3340901	SPBC17D1.06.1	+	3338603	3340340	1	2298	0
II	3340659	3345299	SPBC17D1.07c.1	-	3340724	3343918	8	2.40456e+24	0,326,828,1332,1612,1850,2792,3044
II	3350593	3350688	SPBTRNASER.06.1	+	3350593	3350688	2	41,45	0,50
II	3360518	3360590	SPBTRNAPRO.08.1	-	3360518	3360590	1	72	0
II	3361433	3362721	SPNCRNA.1594.1	-	3361433	3362721	1	1288	0
II	3365689	3367172	SPBC11C11.10.1	+	3365689	3367016	2	2051175	0,308
II	3367170	3369220	SPBC11C11.11c.1	-	3367170	3369220	6	1034,152,30,293,132,180	0,1075,1275,1344,1694,1870
II	3375458	3377375	SPBC3B8.09.1	-	3375560	3377354	1	1917	0
II	3377708	3378587	SPBC3B8.08.1	-	3377814	3378439	2	475241	0,638
II	3379311	3381141	SPNCRNA.1595.1	-	3379311	3381141	1	1830	0
II	3379890	3379982	SPNCRNA.115.1	+	3379890	3379982	1	92	0
II	3385206	3385832	SPNCRNA.1596.1	+	3385206	3385832	1	626	0
II	3390914	3393891	SPNCRNA.1597.1	+	3390914	3393891	1	2977	0
II	339345	340012	SPNCRNA.103.1	-	339345	340012	1	667	0
II	3393615	3393802	SPSNORNA.33.1	+	3393615	3393802	1	187	0
II	3400485	3403309	SPBC13A2.02.1	+	3400602	3403014	1	2824	0
II	340208	340750	SPNCRNA.1342.1	+	340208	340750	1	542	0
II	3408355	3410137	SPNCRNA.419.1	+	3408355	3410137	1	1782	0
II	3408489	3409368	SPNCRNA.1598.1	+	3408489	3409368	1	879	0
II	3409506	3412197	SPNCRNA.1599.1	+	3409506	3412197	1	2691	0
II	3411333	3413051	SPBC4B4.01c.1	-	3411375	3412712	3	1059,89,445	0,1131,1273
II	3412998	3415299	SPBC4B4.02c.1	-	3413337	3415059	1	2301	0
II	3418839	3421189	SPBC4B4.04.1	+	3418887	3420656	2	732239	0,111
II	3421289	3421966	SPBC4B4.05.1	+	3421336	3421701	4	80,72,108,286	0,127,244,391
II	3452322	3453406	SPBC2G2.09c.1	-	3452322	3453406	5	218,181,56,160,288	0,266,499,595,796
II	3457162	3458912	SPBC2G2.12.1	+	3457164	3458856	1	1750	0
II	3462584	3464279	SPBC2G2.15c.1	-	3463214	3464047	5	837,49,236,51,346	0,877,972,1249,1349
II	3466269	3467797	SPBC2G2.17c.1	-	3466569	3467529	1	1528	0
II	3466567	3469109	SPNCRNA.1601.1	+	3466567	3469109	1	2542	0
II	3472318	3474169	SPBC1718.02.1	+	3472318	3474169	7	9.51482e+19	0,143,335,542,823,1261,1534
II	3472408	3474227	SPNCRNA.1602.1	-	3472408	3474227	1	1819	0
II	3478460	3479741	SPBC1718.05.1	+	3478571	3479552	4	320185125300	0,364,649,981
II	3478535	3479968	SPNCRNA.1603.1	-	3478535	3479968	1	1433	0
II	3479674	3482664	SPBC1718.06.1	+	3479897	3482609	1	2990	0
II	3488677	3489268	SPNCRNA.1604.1	-	3488677	3489268	1	591	0
II	3488894	3489307	SPNCRNA.1605.1	+	3488894	3489307	1	413	0
II	3491434	3494442	SPNCRNA.1606.1	-	3491434	3494442	1	3008	0
II	3496925	3498873	SPNCRNA.1607.1	-	3496925	3498873	1	1948	0
II	3510948	3512276	SPNCRNA.574.1	+	3510948	3512276	1	1328	0
II	3511044	3512464	SPNCRNA.1608.1	+	3511044	3512464	1	1420	0
II	35111	36589	SPBC1348.12.1	+	35111	36589	5	60402136198356	0,99,636,816,1122
II	3512861	3513996	SPNCRNA.421.1	+	3512861	3513996	1	1135	0
II	3513209	3514247	SPNCRNA.1609.1	-	3513209	3514247	1	1038	0
II	3526855	3528695	SPNCRNA.1610.1	-	3526855	3528695	1	1840	0
II	3529598	3530978	SPNCRNA.1611.1	-	3529598	3530978	1	1380	0
II	354030	355573	SPNCRNA.1343.1	+	354030	355573	1	1543	0
II	3541278	3542882	SPNCRNA.1613.1	-	3541278	3542882	1	1604	0
II	3548810	3549913	SPBC887.05c.1	-	3549137	3549881	2	976,37	0,1066
II	3549994	3550817	SPBC887.06c.1	-	3550019	3550635	4	110,197,66,266	0,190,442,557
II	3550078	3550761	SPNCRNA.1614.1	+	3550078	3550761	1	683	0
II	3551266	3551891	SPBC887.07.1	+	3551317	3551834	3	123,58,338	0,166,287
II	3555917	3556114	SPNCRNA.423.1	+	3555917	3556114	1	197	0
II	3559166	3560896	SPNCRNA.1615.1	-	3559166	3560896	1	1730	0
II	355919	355991	SPBTRNAGLN.04.1	+	355919	355991	1	72	0
II	355996	357265	SPNCRNA.1344.1	-	355996	357265	1	1269	0
II	3572652	3574232	SPNCRNA.1616.1	+	3572652	3574232	1	1580	0
II	3574354	3575038	SPNCRNA.1617.1	-	3574354	3575038	1	684	0
II	3574868	3575250	SPBC887.16.1	+	3574920	3575250	1	382	0
II	3580721	3582044	SPNCRNA.1618.1	-	3580721	3582044	1	1323	0
[truncated: 5,015 more rows]

## Sheet: TableS6 (RNA-seq splicing)
id.gene	id.intron	chr	start.intron	end.intron	strand	length.intron	distTSS	distPA	distCDS.start	distCDS.end	length.gene	length.ORF	length.CDS	count.introns	order.introns.fwd	order.introns.rev	id.exon.minus1	length.exon.minus1	id.exon.plus1	length.exon.plus1	gc_fract.genes	gc_fract.intron	gc_fract.exon.minus1	gc_fract.exon.plus1	motif.5SS	position.end.5SS	score.5SS	motif.3SS	position.end.3SS	score.3SS	coverage.sum.Sp_CH_nRNA_introns	coverage.sum.Sp_CP_mRNA_introns	coverage.sum.Sp_RP_mRNA_introns	coverage.sum.Sp_CH_nRNA_exon.minus1	coverage.sum.Sp_CP_mRNA_exon.minus1	coverage.sum.Sp_RP_mRNA_exon.minus1	coverage.sum.Sp_CH_nRNA_exon.plus1	coverage.sum.Sp_CP_mRNA_exon.plus1	coverage.sum.Sp_RP_mRNA_exon.plus1	coverage.sum.Sp_CH_nRNA_200dsPolyA	coverage.sum.Sp_CP_mRNA_200dsPolyA	coverage.sum.Sp_RP_mRNA_200dsPolyA	fpkm.log2.fold_change_mw.mc	fpkm.p.value_mw.mc	fpkm.mc	fpkm.mw	fpkm.log2.fold_change_nw.mw	fpkm.p.value_nw.mw	fpkm.nw
SPAC1002.01.1	SPAC1002.01.1_Intron1	I	1798830	1798959	+	129	484	56	484	56	669	540	540	1	1	1	SPAC1002.01.1_Exon1	485	SPAC1002.01.1_Exon2	57	0.364723	0.317829	0.379381	0.368421	GTTAGT	6	4.67	AAG	129	3.03	NA	NA	NA	0.882474	1.06392	5.99588	NA	NA	NA	0.975	2.065	4.87	-0.733186	0.0154	5.15472	8.56872	-0.524239	0.04185	12.3233
SPAC1002.06c.1	SPAC1002.06c.1_Intron1	I	1807402	1807482	-	80	299	133	299	133	512	357	357	2	2	1	SPAC1002.06c.1_Exon2	161	SPAC1002.06c.1_Exon1	134	0.357422	0.25	0.391304	0.395522	GTATTT	6	3.36	TAG	80	5.14	NA	NA	NA	NA	NA	NA	NA	NA	NA	NA	NA	NA	-1.3212	1	0.170523	0.426092	-4.19973	0.04165	7.82979
SPAC1002.06c.1	SPAC1002.06c.1_Intron2	I	1807642	1807717	-	75	64	373	64	373	512	357	357	2	1	2	SPAC1002.06c.1_Exon3	65	SPAC1002.06c.1_Exon2	161	0.357422	0.32	0.384615	0.391304	GTAAGT	6	9.48	TAG	75	5.14	NA	NA	NA	0.430769	0.0923077	0.184615	NA	NA	NA	NA	NA	NA	-1.3212	1	0.170523	0.426092	-4.19973	0.04165	7.82979
SPAC10F6.08c.1	SPAC10F6.08c.1_Intron2	I	1220703	1220754	-	51	93	1037	43	1037	1181	1076	1026	2	1	2	SPAC10F6.08c.1_Exon3	94	SPAC10F6.08c.1_Exon2	210	0.369179	0.254902	0.404255	0.404762	GTGAAT	6	0.67	CAG	51	4.79	NA	NA	NA	0.638298	0.361702	1.2766	2.72857	1.25714	5.32381	1.835	2.51	0.13	0.0184453	0.92225	10.6379	10.5028	-1.20921	5e-05	24.2836
SPAC10F6.08c.1	SPAC10F6.08c.1_Intron1	I	1220440	1220494	-	54	353	774	303	774	1181	1076	1026	2	2	1	SPAC10F6.08c.1_Exon2	210	SPAC10F6.08c.1_Exon1	775	0.369179	0.240741	0.404762	0.374194	GTAAGT	6	9.48	TAG	54	5.14	0.5	0	0	2.72857	1.25714	5.32381	2.19484	2.00774	4.45032	1.835	2.51	0.13	0.0184453	0.92225	10.6379	10.5028	-1.20921	5e-05	24.2836
SPAC10F6.16.1	SPAC10F6.16.1_Intron1	I	1238979	1239024	+	45	84	1161	84	400	1290	1181	420	2	1	2	SPAC10F6.16.1_Exon1	85	SPAC10F6.16.1_Exon2	85	0.371318	0.266667	0.435294	0.376471	GTAAGT	6	9.48	TAG	45	5.14	NA	NA	NA	0.376471	0.470588	7.01176	6.15294	8.78824	76.6235	NA	NA	NA	0.733703	5e-05	108.838	65.4505	0.31969	0.0716	52.4417
SPAC10F6.16.1	SPAC10F6.16.1_Intron2	I	1239108	1239172	+	64	213	1013	213	252	1290	1181	420	2	2	1	SPAC10F6.16.1_Exon2	85	SPAC10F6.16.1_Exon3	1014	0.371318	0.328125	0.376471	0.373767	GTATGG	6	6.77	TAG	64	5.14	2.96875	0.3125	2.85938	6.15294	8.78824	76.6235	5.39546	10.9053	15.1607	NA	NA	NA	0.733703	5e-05	108.838	65.4505	0.31969	0.0716	52.4417
SPAC110.05.1	SPAC110.05.1_Intron1	I	1904455	1904498	-	43	1655	260	1322	-1229	1958	1915	93	1	1	1	SPAC110.05.1_Exon2	1656	SPAC110.05.1_Exon1	261	0.345761	0.232558	0.349034	0.344828	GTATAA	6	2.07	CAG	43	4.79	NA	NA	NA	0.382246	0.698671	0.107488	0.697318	0.245211	0.0689655	2.235	1.035	1	1.1805	0.00825	6.65391	2.93571	-0.603004	0.37765	4.45897
SPAC11D3.03c.1	SPAC11D3.03c.1_Intron1	I	112046	112097	-	51	402	1143	-133	1042	1596	1501	909	2	2	1	SPAC11D3.03c.1_Exon2	237	SPAC11D3.03c.1_Exon1	1144	0.365915	0.333333	0.396624	0.384615	GTATAT	6	3.74	TAG	51	5.14	NA	NA	NA	NA	NA	NA	0.0987762	0.445804	0.184441	NA	NA	NA	3.11839	5e-05	55.1964	6.35599	0.994764	0.0072	3.18955
SPAC11D3.03c.1	SPAC11D3.03c.1_Intron2	I	112333	112377	-	44	122	1430	-420	1329	1596	1501	909	2	1	2	SPAC11D3.03c.1_Exon3	123	SPAC11D3.03c.1_Exon2	237	0.365915	0.227273	0.203252	0.396624	GTACAC	6	2.3	TAG	44	5.14	NA	NA	NA	NA	NA	NA	NA	NA	NA	NA	NA	NA	3.11839	5e-05	55.1964	6.35599	0.994764	0.0072	3.18955
SPAC11E3.06.1	SPAC11E3.06.1_Intron1	I	5292938	5293022	+	84	291	1729	144	1322	2104	1751	1197	2	1	2	SPAC11E3.06.1_Exon1	292	SPAC11E3.06.1_Exon2	170	0.334125	0.25	0.304795	0.4	GTAAAA	6	2.87	TAG	84	5.14	NA	NA	NA	0.660959	0.0719178	0.219178	0.823529	0.188235	0.629412	NA	NA	NA	-0.188806	0.6886	1.21663	1.38673	-1.49639	0.0028	3.91247
SPAC11E3.06.1	SPAC11E3.06.1_Intron2	I	5293191	5293460	+	269	544	1291	397	884	2104	1751	1197	2	2	1	SPAC11E3.06.1_Exon2	170	SPAC11E3.06.1_Exon3	1292	0.334125	0.260223	0.4	0.354489	GTATGT	6	8.68	TAG	269	5.14	NA	NA	NA	0.823529	0.188235	0.629412	0.30418	0.267802	0.414861	NA	NA	NA	-0.188806	0.6886	1.21663	1.38673	-1.49639	0.0028	3.91247
SPAC1250.01.1	SPAC1250.01.1_Intron1	I	5103924	5103965	-	41	229	3777	51	3549	4047	4006	3600	1	1	1	SPAC1250.01.1_Exon2	230	SPAC1250.01.1_Exon1	3778	0.390166	0.365854	0.347826	0.393065	GTAAGT	6	9.48	TAG	41	5.14	NA	NA	NA	4.5	0.334783	1.20435	4.36898	1.81313	4.62864	NA	NA	NA	0.140191	0.50555	9.59234	8.70408	-2.00273	5e-05	34.8823
SPAC1250.02.1	SPAC1250.02.1_Intron1	I	5099512	5099597	-	85	617	220	389	148	922	837	537	1	1	1	SPAC1250.02.1_Exon2	618	SPAC1250.02.1_Exon1	221	0.340564	0.341176	0.338188	0.348416	GTAAGT	6	9.48	TAG	85	5.14	NA	NA	NA	NA	NA	NA	NA	NA	NA	NA	NA	NA	-0.809366	0.2305	4.00314	7.01527	-0.825156	0.26955	12.4291
SPAC1250.03.1	SPAC1250.03.1_Intron1	I	5098405	5098506	-	101	310	716	310	219	1127	965	468	2	2	1	SPAC1250.03.1_Exon2	208	SPAC1250.03.1_Exon1	717	0.367347	0.237624	0.403846	0.384937	GTAAGC	6	8.38	TAG	101	5.14	0.970297	0.049505	0	2.54808	12.5529	22.3125	1.83821	11.5718	5.79916	NA	NA	NA	-0.113491	0.45295	42.271	45.7306	1.59388	5e-05	15.1496
SPAC1250.03.1	SPAC1250.03.1_Intron2	I	5098713	5098774	-	61	42	1024	42	527	1127	965	468	2	1	2	SPAC1250.03.1_Exon3	43	SPAC1250.03.1_Exon2	208	0.367347	0.213115	0.44186	0.403846	GTAAGT	6	9.48	CAG	61	4.79	0.803279	0.0983607	0	0.302326	0.255814	7	2.54808	12.5529	22.3125	NA	NA	NA	-0.113491	0.45295	42.271	45.7306	1.59388	5e-05	15.1496
SPAC12B10.05.1	SPAC12B10.05.1_Intron10	I	4583961	4584010	+	49	1663	501	1584	323	2213	1718	1461	11	10	2	SPAC12B10.05.1_Exon10	223	SPAC12B10.05.1_Exon11	109	0.352915	0.367347	0.390135	0.394495	GTAAGT	6	9.48	TAG	49	5.14	NA	NA	NA	1.52018	4.03139	1.52915	1.13761	5.48624	6	NA	NA	NA	0.139914	0.6766	14.9428	13.5617	-0.191819	0.4932	15.4902
SPAC12B10.05.1	SPAC12B10.05.1_Intron11	I	4584118	4584162	+	44	1820	349	1741	171	2213	1718	1461	11	11	1	SPAC12B10.05.1_Exon11	109	SPAC12B10.05.1_Exon12	350	0.352915	0.340909	0.394495	0.325714	GTAAGT	6	9.48	TAG	44	5.14	0.5	0	0	1.13761	5.48624	6	0.568571	2.19143	0.691429	NA	NA	NA	0.139914	0.6766	14.9428	13.5617	-0.191819	0.4932	15.4902
SPAC12B10.05.1	SPAC12B10.05.1_Intron1	I	4582549	4582594	+	45	251	1917	172	1739	2213	1718	1461	11	1	11	SPAC12B10.05.1_Exon1	252	SPAC12B10.05.1_Exon2	104	0.352915	0.377778	0.329365	0.423077	GTAAGC	6	8.38	TAG	45	5.14	1.02222	0.0888889	0	1.5754	0.972222	2.8373	2.14423	1.56731	3.63462	NA	NA	NA	0.139914	0.6766	14.9428	13.5617	-0.191819	0.4932	15.4902
SPAC12B10.05.1	SPAC12B10.05.1_Intron4	I	4582833	4582868	+	35	535	1643	456	1465	2213	1718	1461	11	4	8	SPAC12B10.05.1_Exon4	28	SPAC12B10.05.1_Exon5	15	0.352915	0.314286	0.392857	0.2	GTAAGA	6	7.8	TAG	35	5.14	0.514286	0	0	1.46429	0.607143	2.5	1.2	0.733333	2.93333	NA	NA	NA	0.139914	0.6766	14.9428	13.5617	-0.191819	0.4932	15.4902
SPAC12B10.05.1	SPAC12B10.05.1_Intron5	I	4582882	4582930	+	48	584	1581	505	1403	2213	1718	1461	11	5	7	SPAC12B10.05.1_Exon5	15	SPAC12B10.05.1_Exon6	34	0.352915	0.1875	0.2	0.382353	GTAATC	6	3.06	AAG	48	3.03	0.645833	0.104167	0	1.2	0.733333	2.93333	2.11765	1.41176	2.26471	NA	NA	NA	0.139914	0.6766	14.9428	13.5617	-0.191819	0.4932	15.4902
SPAC12B10.05.1	SPAC12B10.05.1_Intron6	I	4582963	4583006	+	43	665	1505	586	1327	2213	1718	1461	11	6	6	SPAC12B10.05.1_Exon6	34	SPAC12B10.05.1_Exon7	129	0.352915	0.325581	0.382353	0.348837	GTAAGT	6	9.48	AAG	43	3.03	NA	NA	NA	2.11765	1.41176	2.26471	2.07752	0.744186	2.25581	NA	NA	NA	0.139914	0.6766	14.9428	13.5617	-0.191819	0.4932	15.4902
SPAC12B10.05.1	SPAC12B10.05.1_Intron3	I	4582767	4582806	+	39	469	1705	390	1527	2213	1718	1461	11	3	9	SPAC12B10.05.1_Exon3	22	SPAC12B10.05.1_Exon4	28	0.352915	0.282051	0.454545	0.392857	GTAAGG	6	7.57	AAG	39	3.03	1.76923	0.282051	0.230769	2.31818	1.31818	3.36364	1.46429	0.607143	2.5	NA	NA	NA	0.139914	0.6766	14.9428	13.5617	-0.191819	0.4932	15.4902
SPAC12B10.05.1	SPAC12B10.05.1_Intron8	I	4583557	4583618	+	61	1259	893	1180	715	2213	1718	1461	11	8	4	SPAC12B10.05.1_Exon8	385	SPAC12B10.05.1_Exon9	79	0.352915	0.278689	0.4	0.405063	GTAAGT	6	9.48	AAG	61	3.03	NA	NA	NA	2.4026	3.28831	1.74805	1.89873	3.98734	1.11392	NA	NA	NA	0.139914	0.6766	14.9428	13.5617	-0.191819	0.4932	15.4902
SPAC12B10.05.1	SPAC12B10.05.1_Intron9	I	4583696	4583739	+	43	1398	772	1319	594	2213	1718	1461	11	9	3	SPAC12B10.05.1_Exon9	79	SPAC12B10.05.1_Exon10	223	0.352915	0.325581	0.405063	0.390135	GTAAGT	6	9.48	CAG	43	4.79	NA	NA	NA	1.89873	3.98734	1.11392	1.52018	4.03139	1.52915	NA	NA	NA	0.139914	0.6766	14.9428	13.5617	-0.191819	0.4932	15.4902
SPAC12B10.05.1	SPAC12B10.05.1_Intron2	I	4582697	4582746	+	49	399	1765	320	1587	2213	1718	1461	11	2	10	SPAC12B10.05.1_Exon2	104	SPAC12B10.05.1_Exon3	22	0.352915	0.367347	0.423077	0.454545	GTAAAC	6	3.45	CAG	49	4.79	1.61224	0.285714	0	2.14423	1.56731	3.63462	2.31818	1.31818	3.36364	NA	NA	NA	0.139914	0.6766	14.9428	13.5617	-0.191819	0.4932	15.4902
SPAC12B10.05.1	SPAC12B10.05.1_Intron7	I	4583134	4583173	+	39	836	1338	757	1160	2213	1718	1461	11	7	5	SPAC12B10.05.1_Exon7	129	SPAC12B10.05.1_Exon8	385	0.352915	0.25641	0.348837	0.4	GTAAGC	6	8.38	TAG	39	5.14	0.615385	0	0	2.07752	0.744186	2.25581	2.4026	3.28831	1.74805	NA	NA	NA	0.139914	0.6766	14.9428	13.5617	-0.191819	0.4932	15.4902
SPAC12B10.08c.1	SPAC12B10.08c.1_Intron1	I	4587390	4587449	-	59	1315	1082	609	807	2456	2352	1371	2	2	1	SPAC12B10.08c.1_Exon2	489	SPAC12B10.08c.1_Exon1	1083	0.337948	0.254237	0.390593	0.336103	GTAATA	6	2.48	AAG	59	3.03	0.288136	0	0	0.580777	0.298569	1.22495	0.472761	0.697138	0.278855	NA	NA	NA	-0.529215	0.46915	2.04921	2.9573	-1.33292	0.02245	7.4498
SPAC12B10.08c.1	SPAC12B10.08c.1_Intron2	I	4587937	4587982	-	45	782	1629	76	1354	2456	2352	1371	2	1	2	SPAC12B10.08c.1_Exon3	783	SPAC12B10.08c.1_Exon2	489	0.337948	0.244444	0.321839	0.390593	GTATGA	6	7	TAG	45	5.14	0.622222	0	0.2	0.344828	0.137931	0.180077	0.580777	0.298569	1.22495	NA	NA	NA	-0.529215	0.46915	2.04921	2.9573	-1.33292	0.02245	7.4498
SPAC12B10.09.1	SPAC12B10.09.1_Intron2	I	4588723	4588868	+	145	474	925	474	706	1544	1257	1038	3	2	2	SPAC12B10.09.1_Exon2	158	SPAC12B10.09.1_Exon3	456	0.335492	0.268966	0.43038	0.385965	GTATGA	6	7	TAG	145	5.14	0.475862	0.213793	0.275862	1.57595	4.89241	12.6646	1.3443	4.92105	12.2917	NA	NA	NA	-0.239341	0.48425	14.3611	16.9526	0.906671	0.0097	9.04274
SPAC12B10.09.1	SPAC12B10.09.1_Intron3	I	4589323	4589409	+	86	1074	384	1074	165	1544	1257	1038	3	3	1	SPAC12B10.09.1_Exon3	456	SPAC12B10.09.1_Exon4	385	0.335492	0.27907	0.385965	0.306494	GTATGT	6	8.68	TAG	86	5.14	0.465116	0.0930233	0	1.3443	4.92105	12.2917	0.568831	3.57662	3.62597	NA	NA	NA	-0.239341	0.48425	14.3611	16.9526	0.906671	0.0097	9.04274
SPAC12B10.09.1	SPAC12B10.09.1_Intron1	I	4588510	4588566	+	56	261	1227	261	1008	1544	1257	1038	3	1	3	SPAC12B10.09.1_Exon1	262	SPAC12B10.09.1_Exon2	158	0.335492	0.232143	0.316794	0.43038	GTAAGA	6	7.8	TAG	56	5.14	0.125	0	0	0.0229008	0.0648855	0.709924	1.57595	4.89241	12.6646	NA	NA	NA	-0.239341	0.48425	14.3611	16.9526	0.906671	0.0097	9.04274
SPAC12B10.14c.1	SPAC12B10.14c.1_Intron1	I	4597621	4597679	-	58	1943	156	1943	55	2157	2099	1998	1	1	1	SPAC12B10.14c.1_Exon2	1944	SPAC12B10.14c.1_Exon1	157	0.379694	0.258621	0.389403	0.305732	GTAAGT	6	9.48	TAG	58	5.14	NA	NA	NA	3.14763	1.7356	2.3215	2.36943	4.27389	0.55414	NA	NA	NA	0.198383	0.17435	12.2223	10.6521	-1.56921	5e-05	31.6093
SPAC1399.05c.1	SPAC1399.05c.1_Intron1	I	1838852	1838969	+	117	338	1324	266	1324	1779	1662	1590	1	1	1	SPAC1399.05c.1_Exon1	339	SPAC1399.05c.1_Exon2	1325	0.418775	0.25641	0.430678	0.430189	GTATGA	6	7	TAG	117	5.14	NA	NA	NA	1.36873	0.489676	1.25369	1.31774	0.596226	2.34792	1.06	1.545	0.225	2.88439	0.0008	4.29156	0.581203	-2.32625	0.0025	2.91474
SPAC13C5.02.1	SPAC13C5.02.1_Intron2	I	426322	426363	+	41	692	1052	293	979	1785	1708	1236	2	2	1	SPAC13C5.02.1_Exon2	218	SPAC13C5.02.1_Exon3	1053	0.345098	0.243902	0.40367	0.349478	GTATGT	6	8.68	TAG	41	5.14	NA	NA	NA	5.37615	2.04587	1.80734	3.95726	2.76733	1.75594	NA	NA	NA	-0.323522	0.1305	9.05747	11.3344	-1.62714	5e-05	35.0119
SPAC13C5.02.1	SPAC13C5.02.1_Intron1	I	426069	426105	+	36	439	1310	40	1237	1785	1708	1236	2	1	2	SPAC13C5.02.1_Exon1	440	SPAC13C5.02.1_Exon2	218	0.345098	0.277778	0.325	0.40367	GTAAAT	6	4.54	TAG	36	5.14	NA	NA	NA	2.075	0.204545	0.786364	5.37615	2.04587	1.80734	NA	NA	NA	-0.323522	0.1305	9.05747	11.3344	-1.62714	5e-05	35.0119
SPAC13C5.03.1	SPAC13C5.03.1_Intron1	I	427943	427985	+	42	594	2136	361	1333	2772	2668	1632	2	1	2	SPAC13C5.03.1_Exon1	595	SPAC13C5.03.1_Exon2	606	0.327201	0.214286	0.356303	0.320132	GTAAAC	6	3.45	AAG	42	3.03	NA	NA	NA	2.89412	0.184874	0.0487395	2.68482	0.369637	0.211221	1.215	0.8	5.375	0.083449	0.8492	1.67079	1.57689	-3.50056	5e-05	17.8474
SPAC13C5.03.1	SPAC13C5.03.1_Intron2	I	428590	428652	+	62	1241	1469	1008	666	2772	2668	1632	2	2	1	SPAC13C5.03.1_Exon2	606	SPAC13C5.03.1_Exon3	1470	0.327201	0.274194	0.320132	0.32449	GTTAGT	6	4.67	TAG	62	5.14	0.758065	0	0	2.68482	0.369637	0.211221	1.78639	0.431973	0.193197	1.215	0.8	5.375	0.083449	0.8492	1.67079	1.57689	-3.50056	5e-05	17.8474
SPAC13C5.06c.1	SPAC13C5.06c.1_Intron1	I	434831	434875	-	44	304	730	226	308	1078	1034	534	1	1	1	SPAC13C5.06c.1_Exon2	305	SPAC13C5.06c.1_Exon1	731	0.337662	0.318182	0.35082	0.333789	GTACGT	6	8.33	TAG	44	5.14	NA	NA	NA	1.64262	1.26557	0.609836	1.22709	2.40082	0.273598	NA	NA	NA	0.186325	0.6878	6.58573	5.78781	-0.220139	0.68285	6.74191
SPAC13F5.07c.1	SPAC13F5.07c.1_Intron1	I	2185282	2185471	-	189	519	629	80	418	1337	1148	498	1	1	1	SPAC13F5.07c.1_Exon2	520	SPAC13F5.07c.1_Exon1	630	0.33807	0.338624	0.332692	0.344444	GTAAGG	6	7.57	TAG	189	5.14	NA	NA	NA	NA	NA	NA	0.31746	0.714286	0.131746	NA	NA	NA	0.135407	0.78795	4.18685	3.81176	-0.114078	0.8456	4.12541
SPAC13G6.11c.1	SPAC13G6.11c.1_Intron1	I	195258	195507	-	249	119	1160	75	1140	1528	1279	1215	1	1	1	SPAC13G6.11c.1_Exon2	120	SPAC13G6.11c.1_Exon1	1161	0.366492	0.325301	0.341667	0.378122	GTAAGT	6	9.48	TAG	249	5.14	1.44177	0.0281124	0.0763052	2.15	5.9	6.94167	1.65978	8.48837	15.9302	11.405	17.51	3.3	-0.00227108	0.9878	52.429	52.5116	1.60622	5e-05	17.2479
SPAC13G7.10.1	SPAC13G7.10.1_Intron1	I	2313961	2314048	+	87	317	1112	216	1015	1516	1371	1173	2	1	2	SPAC13G7.10.1_Exon1	318	SPAC13G7.10.1_Exon2	84	0.398417	0.229885	0.399371	0.321429	GTATGT	6	8.68	TAG	87	5.14	0.287356	0.0689655	0	2.0566	0.437107	2.19811	2.64286	1.36905	8.30952	2.455	2.09	11.26	0.82396	0.0321	12.282	6.93796	-1.85403	5e-05	25.0813
SPAC13G7.10.1	SPAC13G7.10.1_Intron2	I	2314131	2314189	+	58	487	971	386	874	1516	1371	1173	2	2	1	SPAC13G7.10.1_Exon2	84	SPAC13G7.10.1_Exon3	972	0.398417	0.310345	0.321429	0.425926	GTATGC	6	7.58	AAG	58	3.03	1.15517	0	0	2.64286	1.36905	8.30952	2.91975	1.95267	7.3323	2.455	2.09	11.26	0.82396	0.0321	12.282	6.93796	-1.85403	5e-05	25.0813
SPAC13G7.11.1	SPAC13G7.11.1_Intron2	I	2315599	2315700	+	101	505	669	413	433	1275	1138	810	2	2	1	SPAC13G7.11.1_Exon2	215	SPAC13G7.11.1_Exon3	670	0.343529	0.306931	0.334884	0.361194	GTACGT	6	8.33	AAG	101	3.03	1.34653	0.881188	1.25743	3.06512	3.43256	14.4558	2.36567	8.19701	4.1597	NA	NA	NA	1.1937	0.0112	12.6762	5.54178	-0.434769	0.40905	7.4908
SPAC13G7.11.1	SPAC13G7.11.1_Intron1	I	2315349	2315385	+	36	255	984	163	748	1275	1138	810	2	1	2	SPAC13G7.11.1_Exon1	256	SPAC13G7.11.1_Exon2	215	0.343529	0.305556	0.332031	0.334884	GTATGT	6	8.68	TAG	36	5.14	2.22222	0.666667	0	2.20703	1.79297	8.98438	3.06512	3.43256	14.4558	NA	NA	NA	1.1937	0.0112	12.6762	5.54178	-0.434769	0.40905	7.4908
SPAC144.03.1	SPAC144.03.1_Intron1	I	4654727	4654766	+	39	66	1690	44	1644	1795	1373	1305	2	1	2	SPAC144.03.1_Exon1	67	SPAC144.03.1_Exon2	98	0.393872	0.282051	0.343284	0.469388	GTAAGA	6	7.8	CAG	39	4.79	3.5641	1.89744	0.512821	4.26866	12.8657	16.5821	8.42857	21.5102	48.7653	0.575	3.58	0.15	-0.252441	0.11265	243.186	289.689	1.88392	5e-05	78.4903
SPAC144.03.1	SPAC144.03.1_Intron2	I	4654863	4655246	+	383	202	1210	180	1164	1795	1373	1305	2	2	1	SPAC144.03.1_Exon2	98	SPAC144.03.1_Exon3	1211	0.393872	0.29765	0.469388	0.425268	GTATGT	6	8.68	TAG	383	5.14	1.53264	0.206266	0.151436	8.42857	21.5102	48.7653	7.06524	43.7828	78.3113	0.575	3.58	0.15	-0.252441	0.11265	243.186	289.689	1.88392	5e-05	78.4903
SPAC14C4.03.1	SPAC14C4.03.1_Intron2	I	5231871	5231920	+	49	732	646	732	646	1427	1338	1338	2	2	1	SPAC14C4.03.1_Exon2	536	SPAC14C4.03.1_Exon3	647	0.374212	0.285714	0.384328	0.383308	GTAAGT	6	9.48	TAG	49	5.14	NA	NA	NA	1.04851	0.0279851	0.0354478	NA	NA	NA	NA	NA	NA	0.636341	1	0.566902	0.364713	-4.45264	5e-05	7.98601
SPAC14C4.03.1	SPAC14C4.03.1_Intron1	I	5231296	5231336	+	40	157	1230	157	1230	1427	1338	1338	2	1	2	SPAC14C4.03.1_Exon1	158	SPAC14C4.03.1_Exon2	536	0.374212	0.275	0.367089	0.384328	GTGTGT	6	4.81	TAG	40	5.14	NA	NA	NA	NA	NA	NA	1.04851	0.0279851	0.0354478	NA	NA	NA	0.636341	1	0.566902	0.364713	-4.45264	5e-05	7.98601
SPAC1556.06.1	SPAC1556.06.1_Intron1	I	3804587	3804660	+	73	2037	294	2037	294	2404	2331	2331	1	1	1	SPAC1556.06.1_Exon1	2038	SPAC1556.06.1_Exon2	295	0.350666	0.287671	0.356232	0.328814	GTAAGT	6	9.48	CAG	73	4.79	NA	NA	NA	0.510795	0.0839058	0.0721295	0.505085	0.410169	0.322034	0.565	0.315	0.025	0.0889575	0.91365	3.52265	3.312	-1.24818	0.0611	7.86737
SPAC15F9.01c.1	SPAC15F9.01c.1_Intron1	I	2397823	2397878	-	55	472	576	310	374	1103	1048	684	1	1	1	SPAC15F9.01c.1_Exon2	473	SPAC15F9.01c.1_Exon1	577	0.336355	0.309091	0.327696	0.348354	GTGCGT	6	4.46	TAG	55	5.14	NA	NA	NA	0.0824524	0.15222	0.181818	0.126516	0.365685	0.0970537	NA	NA	NA	-1.09356	0.00735	0.809391	1.72724	0.237619	0.4943	1.46495
SPAC1610.03c.1	SPAC1610.03c.1_Intron2	I	1794497	1794588	-	91	406	2065	384	1905	2562	2315	2133	3	2	2	SPAC1610.03c.1_Exon3	179	SPAC1610.03c.1_Exon2	476	0.37861	0.274725	0.368715	0.422269	GTAAGT	6	9.48	AAG	91	3.03	NA	NA	NA	NA	NA	NA	NA	NA	NA	1.55	2.23	2.64	-2.31469	1	0.0211167	0.105055	-0.282815	1	0.127806
SPAC1610.03c.1	SPAC1610.03c.1_Intron3	I	1794766	1794851	-	85	143	2334	121	2174	2562	2315	2133	3	1	3	SPAC1610.03c.1_Exon4	144	SPAC1610.03c.1_Exon3	179	0.37861	0.270588	0.326389	0.368715	GTATGA	6	7	TAG	85	5.14	NA	NA	NA	NA	NA	NA	NA	NA	NA	1.55	2.23	2.64	-2.31469	1	0.0211167	0.105055	-0.282815	1	0.127806
SPAC1610.03c.1	SPAC1610.03c.1_Intron1	I	1793951	1794022	-	71	972	1519	950	1359	2562	2315	2133	3	3	1	SPAC1610.03c.1_Exon2	476	SPAC1610.03c.1_Exon1	1520	0.37861	0.295775	0.422269	0.388158	GTAAGC	6	8.38	AAG	71	3.03	NA	NA	NA	NA	NA	NA	0.0690789	0.0519737	0.284211	1.55	2.23	2.64	-2.31469	1	0.0211167	0.105055	-0.282815	1	0.127806
SPAC1687.19c.1	SPAC1687.19c.1_Intron1	I	938958	939001	-	43	830	648	758	511	1521	1424	1215	2	2	1	SPAC1687.19c.1_Exon2	575	SPAC1687.19c.1_Exon1	649	0.3833	0.232558	0.42087	0.362096	GTAAGA	6	7.8	TAG	43	5.14	0.27907	0	0	2.02783	10.0887	18.8591	0.916795	11.0247	13.3683	0.165	0.01	0.845	-0.654326	0.6565	2.56065	4.03015	1.54911	0.47735	1.37718
SPAC1687.19c.1	SPAC1687.19c.1_Intron2	I	939575	939629	-	54	202	1265	130	1128	1521	1424	1215	2	1	2	SPAC1687.19c.1_Exon3	203	SPAC1687.19c.1_Exon2	575	0.3833	0.185185	0.433498	0.42087	GTAAGT	6	9.48	TAG	54	5.14	0.407407	0.0925926	0	1.62069	4.92118	14.1724	2.02783	10.0887	18.8591	0.165	0.01	0.845	-0.654326	0.6565	2.56065	4.03015	1.54911	0.47735	1.37718
SPAC16A10.08c.1	SPAC16A10.08c.1_Intron1	I	3094173	3094228	-	55	657	466	657	201	1178	1123	858	1	1	1	SPAC16A10.08c.1_Exon2	658	SPAC16A10.08c.1_Exon1	467	0.337861	0.345455	0.354103	0.314775	GTACGT	6	8.33	TAG	55	5.14	NA	NA	NA	NA	NA	NA	NA	NA	NA	NA	NA	NA	-0.286101	0.29735	9.31445	11.3575	-0.985367	0.00015	22.4857
SPAC16E8.02.1	SPAC16E8.02.1_Intron1	I	3504269	3504310	+	41	236	2586	9	1270	2863	2212	1235	3	1	3	SPAC16E8.02.1_Exon1	237	SPAC16E8.02.1_Exon2	68	0.355571	0.243902	0.299578	0.397059	GTAAGA	6	7.8	TAG	41	5.14	1.39024	0	0	1.30802	0.253165	3.16034	2.14706	1.19118	3.08824	0.175	0.135	0.5	0.10916	0.8335	2.21867	2.05699	-1.69902	0.0006	6.67866
SPAC16E8.02.1	SPAC16E8.02.1_Intron2	I	3504377	3504421	+	44	344	2475	117	1159	2863	2212	1235	3	2	2	SPAC16E8.02.1_Exon2	68	SPAC16E8.02.1_Exon3	594	0.355571	0.295455	0.397059	0.375421	GTGAGA	6	3.93	AAG	44	3.03	NA	NA	NA	2.14706	1.19118	3.08824	1.42929	1.10606	2.79125	0.175	0.135	0.5	0.10916	0.8335	2.21867	2.05699	-1.69902	0.0006	6.67866
SPAC16E8.02.1	SPAC16E8.02.1_Intron3	I	3505014	3505580	+	566	981	1316	754	0	2863	2212	1235	3	3	1	SPAC16E8.02.1_Exon3	594	SPAC16E8.02.1_Exon4	1317	0.355571	0.385159	0.375421	0.34776	TTTTCC	6	-15.56	TGA	566	-17.55	1.11307	1.10777	1.13604	1.42929	1.10606	2.79125	0.562642	0.292331	0.0485953	0.175	0.135	0.5	0.10916	0.8335	2.21867	2.05699	-1.69902	0.0006	6.67866
SPAC16E8.03.1	SPAC16E8.03.1_Intron1	I	3505209	3505310	+	101	101	347	66	270	549	448	336	1	1	1	SPAC16E8.03.1_Exon1	102	SPAC16E8.03.1_Exon2	348	0.373406	0.376238	0.392157	0.367816	GTATGT	6	8.68	TAG	101	5.14	0.643564	0	0	0.941176	1.63725	1.11765	1.18966	1.01149	1.17816	NA	NA	NA	0.681867	0.2727	15.3323	9.55749	-1.14795	0.0353	21.1792
SPAC16E8.05c.1	SPAC16E8.05c.1_Intron1	I	3508050	3508093	-	43	444	853	184	446	1340	1297	630	1	1	1	SPAC16E8.05c.1_Exon2	445	SPAC16E8.05c.1_Exon1	854	0.347015	0.348837	0.323596	0.359485	GTTTGT	6	3.87	TAG	43	5.14	NA	NA	NA	0.379775	0.0382022	0.103371	0.348946	0.186183	0.277518	0.145	0.035	0.135	-0.540124	1	0.118058	0.171668	-2.75595	0.11765	1.15962
SPAC16E8.12c.1	SPAC16E8.12c.1_Intron1	I	3523644	3523924	-	280	415	509	174	509	1204	835	636	3	3	1	SPAC16E8.12c.1_Exon2	73	SPAC16E8.12c.1_Exon1	510	0.346346	0.310714	0.39726	0.37451	GTAAGT	6	9.48	CAG	280	4.79	0.660714	0.00714286	0	3.57534	1.56164	3.13699	2.60784	3.28235	2.89216	2.395	4.125	0.13	-0.110163	0.5333	14.6531	15.8159	-0.677438	0.0002	25.2943
SPAC16E8.12c.1	SPAC16E8.12c.1_Intron3	I	3524162	3524204	-	42	135	1027	-64	1027	1204	835	636	3	1	3	SPAC16E8.12c.1_Exon4	136	SPAC16E8.12c.1_Exon3	120	0.346346	0.404762	0.338235	0.358333	GTAAAC	6	3.45	AAG	42	3.03	3.09524	1.38095	2.11905	1.95588	0.625	0.625	2.9	1.76667	1.91667	2.395	4.125	0.13	-0.110163	0.5333	14.6531	15.8159	-0.677438	0.0002	25.2943
SPAC16E8.12c.1	SPAC16E8.12c.1_Intron2	I	3523996	3524043	-	47	296	861	55	861	1204	835	636	3	2	2	SPAC16E8.12c.1_Exon3	120	SPAC16E8.12c.1_Exon2	73	0.346346	0.170213	0.358333	0.39726	GTAATA	6	2.48	TAG	47	5.14	1.6383	0.446809	0	2.9	1.76667	1.91667	3.57534	1.56164	3.13699	2.395	4.125	0.13	-0.110163	0.5333	14.6531	15.8159	-0.677438	0.0002	25.2943
SPAC16E8.15.1	SPAC16E8.15.1_Intron1	I	3528385	3528453	+	68	437	993	227	564	1498	1296	657	2	1	2	SPAC16E8.15.1_Exon1	438	SPAC16E8.15.1_Exon2	176	0.361148	0.235294	0.392694	0.409091	GTAAGT	6	9.48	CAG	68	4.79	1.91176	0	0	2.62557	16.2443	53.1187	5.67045	37.9261	91.3239	NA	NA	NA	-0.543312	0.0003	100.557	146.543	2.19081	5e-05	32.0972
SPAC16E8.15.1	SPAC16E8.15.1_Intron2	I	3528628	3528762	+	134	680	684	470	255	1498	1296	657	2	2	1	SPAC16E8.15.1_Exon2	176	SPAC16E8.15.1_Exon3	685	0.361148	0.246269	0.409091	0.366423	GTAGGT	6	6.49	TAG	134	5.14	1.85075	0.30597	0	5.67045	37.9261	91.3239	3.26715	32.0467	33.0394	NA	NA	NA	-0.543312	0.0003	100.557	146.543	2.19081	5e-05	32.0972
SPAC1782.07.1	SPAC1782.07.1_Intron1	I	4767141	4767330	+	189	100	656	32	395	945	608	279	3	1	3	SPAC1782.07.1_Exon1	101	SPAC1782.07.1_Exon2	19	0.344974	0.338624	0.356436	0.631579	GTAAGT	6	9.48	TAG	189	5.14	1.89418	0.10582	0.0740741	0.49505	8.11881	15.3168	3.05263	101.316	477.947	2.735	3.245	0.185	0.130944	0.43075	387.562	353.935	2.94864	5e-05	45.8453
SPAC1782.07.1	SPAC1782.07.1_Intron3	I	4767607	4767710	+	103	566	276	498	15	945	608	279	3	3	1	SPAC1782.07.1_Exon3	215	SPAC1782.07.1_Exon4	277	0.344974	0.300971	0.413953	0.314079	GTAAGT	6	9.48	TAG	103	5.14	1.53398	0.135922	0.194175	7.11163	118.028	215.181	2.12635	21.1949	6.28881	2.735	3.245	0.185	0.130944	0.43075	387.562	353.935	2.94864	5e-05	45.8453
SPAC1782.07.1	SPAC1782.07.1_Intron2	I	4767348	4767393	+	45	307	593	239	332	945	608	279	3	2	2	SPAC1782.07.1_Exon2	19	SPAC1782.07.1_Exon3	215	0.344974	0.222222	0.631579	0.413953	GTAAGT	6	9.48	AAG	45	3.03	2.04444	1.33333	2.62222	3.05263	101.316	477.947	7.11163	118.028	215.181	2.735	3.245	0.185	0.130944	0.43075	387.562	353.935	2.94864	5e-05	45.8453
SPAC1782.09c.1	SPAC1782.09c.1_Intron1	I	4771555	4771610	-	55	98	1565	49	1565	1718	1663	1614	1	1	1	SPAC1782.09c.1_Exon2	99	SPAC1782.09c.1_Exon1	1566	0.403958	0.254545	0.40404	0.409323	GTATGC	6	7.58	TAG	55	5.14	4.96364	0	0	4.72727	0.212121	2.15152	6.73308	0.62069	6.48723	4.74	1.405	0.01	0.520546	0.00745	5.41482	3.77471	-4.06554	5e-05	63.2023
SPAC1782.12c.1	SPAC1782.12c.1_Intron1	I	4773658	4773735	-	77	1634	200	1459	-950	1911	1682	357	3	3	1	SPAC1782.12c.1_Exon2	1200	SPAC1782.12c.1_Exon1	201	0.3663	0.272727	0.39	0.378109	GTACGA	6	6.65	TAG	77	5.14	NA	NA	NA	0.570833	1.92333	3.23833	NA	NA	NA	0.46	0.02	0.1	-0.364634	0.59315	7.52162	9.6845	0.363176	0.4767	7.52922
SPAC1782.12c.1	SPAC1782.12c.1_Intron3	I	4775067	4775163	-	96	206	1609	31	382	1911	1682	357	3	1	3	SPAC1782.12c.1_Exon4	207	SPAC1782.12c.1_Exon3	78	0.3663	0.260417	0.318841	0.461538	GTAGGT	6	6.49	AAG	96	3.03	0.416667	0.260417	0.1875	0.487923	2.25121	3.42995	0.987179	3.79487	14.1923	0.46	0.02	0.1	-0.364634	0.59315	7.52162	9.6845	0.363176	0.4767	7.52922
SPAC1782.12c.1	SPAC1782.12c.1_Intron2	I	4774934	4774990	-	56	379	1476	204	249	1911	1682	357	3	2	2	SPAC1782.12c.1_Exon3	78	SPAC1782.12c.1_Exon2	1200	0.3663	0.196429	0.461538	0.39	GTAGGA	6	4.81	TAG	56	5.14	0.357143	0	0	0.987179	3.79487	14.1923	0.570833	1.92333	3.23833	0.46	0.02	0.1	-0.364634	0.59315	7.52162	9.6845	0.363176	0.4767	7.52922
SPAC17A2.07c.1	SPAC17A2.07c.1_Intron1	I	3567638	3567740	-	102	121	416	118	416	639	537	534	1	1	1	SPAC17A2.07c.1_Exon2	122	SPAC17A2.07c.1_Exon1	417	0.372457	0.303922	0.360656	0.395683	GTATGT	6	8.68	CAG	102	4.79	1.7549	0	0	2.55738	0.213115	1.54918	4.3765	0.2494	5.94484	3.215	0.06	0.125	-0.523849	0.2923	1.35741	1.95167	-4.78808	5e-05	53.9214
SPAC17A5.02c.1	SPAC17A5.02c.1_Intron1	I	1754145	1754185	-	40	1530	372	1453	113	1942	1773	1437	4	4	1	SPAC17A5.02c.1_Exon2	126	SPAC17A5.02c.1_Exon1	373	0.368692	0.325	0.349206	0.302949	GTAAGT	6	9.48	TAG	40	5.14	0.3	0.125	0	1.24603	6.47619	3.2619	0.780161	2.22788	0.597855	NA	NA	NA	0.0253135	0.85975	12.8239	12.6009	0.372477	0.033	9.73359
SPAC17A5.02c.1	SPAC17A5.02c.1_Intron3	I	1755118	1755163	-	45	552	1345	475	1086	1942	1773	1437	4	2	3	SPAC17A5.02c.1_Exon4	123	SPAC17A5.02c.1_Exon3	770	0.368692	0.244444	0.422764	0.412987	GTATAA	6	2.07	TAG	45	5.14	1.17778	0.244444	0	2	2.43089	7.25203	2.02597	4.22987	5.15195	NA	NA	NA	0.0253135	0.85975	12.8239	12.6009	0.372477	0.033	9.73359
SPAC17A5.02c.1	SPAC17A5.02c.1_Intron2	I	1754310	1754349	-	39	1366	537	1289	278	1942	1773	1437	4	3	2	SPAC17A5.02c.1_Exon3	770	SPAC17A5.02c.1_Exon2	126	0.368692	0.358974	0.412987	0.349206	GTAAGC	6	8.38	TAG	39	5.14	NA	NA	NA	2.02597	4.22987	5.15195	1.24603	6.47619	3.2619	NA	NA	NA	0.0253135	0.85975	12.8239	12.6009	0.372477	0.033	9.73359
SPAC17A5.02c.1	SPAC17A5.02c.1_Intron4	I	1755285	1755330	-	45	385	1512	308	1253	1942	1773	1437	4	1	4	SPAC17A5.02c.1_Exon5	386	SPAC17A5.02c.1_Exon4	123	0.368692	0.444444	0.349741	0.422764	GTAAGT	6	9.48	CAG	45	4.79	1.51111	0.0888889	0	1.79534	1.48187	3.36528	2	2.43089	7.25203	NA	NA	NA	0.0253135	0.85975	12.8239	12.6009	0.372477	0.033	9.73359
SPAC17A5.04c.1	SPAC17A5.04c.1_Intron1	I	1758185	1758256	-	71	946	736	946	593	1753	1682	1539	1	1	1	SPAC17A5.04c.1_Exon2	947	SPAC17A5.04c.1_Exon1	737	0.391329	0.295775	0.383316	0.411126	GTAAGT	6	9.48	AAG	71	3.03	NA	NA	NA	1.55544	1.25977	0.104541	NA	NA	NA	NA	NA	NA	-0.0557777	0.71675	9.29286	9.65918	-1.05835	5e-05	20.1158
SPAC17A5.11.1	SPAC17A5.11.1_Intron2	I	1773372	1773422	+	50	448	781	448	781	1279	1038	1038	4	2	3	SPAC17A5.11.1_Exon2	110	SPAC17A5.11.1_Exon3	79	0.352619	0.26	0.409091	0.392405	GTAAGT	6	9.48	TAG	50	5.14	0.18	0	0	0.163636	0.227273	0.354545	0.417722	0.455696	0.405063	1.345	0.525	3.735	-0.59059	0.074	1.77307	2.67	-0.797161	0.0064	4.6396
SPAC17A5.11.1	SPAC17A5.11.1_Intron4	I	1773693	1773762	+	69	769	441	769	441	1279	1038	1038	4	4	1	SPAC17A5.11.1_Exon4	130	SPAC17A5.11.1_Exon5	442	0.352619	0.347826	0.407692	0.364253	GTAAGT	6	9.48	CAG	69	4.79	NA	NA	NA	0.246154	0.2	0.215385	0.285068	0.58371	0.156109	1.345	0.525	3.735	-0.59059	0.074	1.77307	2.67	-0.797161	0.0064	4.6396
SPAC17A5.11.1	SPAC17A5.11.1_Intron1	I	1773205	1773263	+	58	281	940	281	940	1279	1038	1038	4	1	4	SPAC17A5.11.1_Exon1	282	SPAC17A5.11.1_Exon2	110	0.352619	0.310345	0.340426	0.409091	GTAATT	6	4.16	CAG	58	4.79	NA	NA	NA	0.230496	0.287234	0.212766	0.163636	0.227273	0.354545	1.345	0.525	3.735	-0.59059	0.074	1.77307	2.67	-0.797161	0.0064	4.6396
SPAC17A5.11.1	SPAC17A5.11.1_Intron3	I	1773500	1773564	+	64	576	639	576	639	1279	1038	1038	4	3	2	SPAC17A5.11.1_Exon3	79	SPAC17A5.11.1_Exon4	130	0.352619	0.234375	0.392405	0.407692	GTAGGT	6	6.49	CAG	64	4.79	NA	NA	NA	0.417722	0.455696	0.405063	0.246154	0.2	0.215385	1.345	0.525	3.735	-0.59059	0.074	1.77307	2.67	-0.797161	0.0064	4.6396
SPAC17A5.13.1	SPAC17A5.13.1_Intron1	I	1776608	1776661	+	53	109	710	109	710	872	708	708	2	1	2	SPAC17A5.13.1_Exon1	110	SPAC17A5.13.1_Exon2	297	0.384174	0.226415	0.445455	0.377104	GTAAGT	6	9.48	TAG	53	5.14	1.24528	0.264151	0	3.74545	8.63636	53.5455	3.82828	5.67003	35.0404	2.255	5.055	0.395	0.105999	0.45065	52.9764	49.2236	0.256528	0.0801	41.2051
SPAC17A5.13.1	SPAC17A5.13.1_Intron2	I	1776957	1777068	+	111	458	303	458	303	872	708	708	2	2	1	SPAC17A5.13.1_Exon2	297	SPAC17A5.13.1_Exon3	304	0.384174	0.342342	0.377104	0.414474	GTAGGT	6	6.49	TAG	111	5.14	1.88288	0.171171	0	3.82828	5.67003	35.0404	3.30592	8.44408	29.4276	2.255	5.055	0.395	0.105999	0.45065	52.9764	49.2236	0.256528	0.0801	41.2051
SPAC17A5.19.1	SPAC17A5.19.1_Intron1	I	1761231	1761275	+	44	448	180	99	180	672	628	279	1	1	1	SPAC17A5.19.1_Exon1	449	SPAC17A5.19.1_Exon2	181	0.315476	0.295455	0.305122	0.348066	GTATGT	6	8.68	TAG	44	5.14	0.340909	0	0.568182	0.376392	0.0801782	0.895323	2.03867	0.314917	1.42541	2.03	0.46	0.15	-0.213646	0.7064	0.947124	1.0983	-3.43345	5e-05	11.8657
SPAC17C9.01c.1	SPAC17C9.01c.1_Intron2	I	4498651	4498757	+	106	578	1824	520	1523	2508	2357	1998	2	2	1	SPAC17C9.01c.1_Exon2	172	SPAC17C9.01c.1_Exon3	1825	0.356858	0.235849	0.383721	0.364932	GTATGT	6	8.68	TAG	106	5.14	1.87736	0	0	2.57558	1.02907	5.14535	1.83178	1.75342	1.8126	3.165	25.11	37.53	0.102257	0.80705	9.0739	8.45301	-1.19293	0.0147	19.3249
SPAC17C9.01c.1	SPAC17C9.01c.1_Intron1	I	4498435	4498480	+	45	362	2101	304	1800	2508	2357	1998	2	1	2	SPAC17C9.01c.1_Exon1	363	SPAC17C9.01c.1_Exon2	172	0.356858	0.355556	0.344353	0.383721	GTATGT	6	8.68	TAG	45	5.14	NA	NA	NA	2.79339	0.735537	5.28375	2.57558	1.02907	5.14535	3.165	25.11	37.53	0.102257	0.80705	9.0739	8.45301	-1.19293	0.0147	19.3249
SPAC17C9.02c.1	SPAC17C9.02c.1_Intron1	I	4497032	4497075	+	43	300	1065	63	714	1408	1365	777	1	1	1	SPAC17C9.02c.1_Exon1	301	SPAC17C9.02c.1_Exon2	1066	0.345881	0.209302	0.302326	0.364916	GTATGT	6	8.68	TAG	43	5.14	NA	NA	NA	2.03322	0.51495	1.299	3.35084	1.85084	1.42683	2.83	0.72	7.445	-0.703454	0.2244	5.65198	9.20367	-1.80952	0.0013	32.2612
SPAC17G6.12.1	SPAC17G6.12.1_Intron1	I	3612191	3612236	+	45	110	2647	68	2647	2802	2346	2304	4	1	4	SPAC17G6.12.1_Exon1	111	SPAC17G6.12.1_Exon2	88	0.366167	0.355556	0.27027	0.352273	GTATGT	6	8.68	CAG	45	4.79	1.86667	0.2	1.15556	1.25225	0.54955	5.2973	3.14773	0.738636	6.14773	2.065	1.87	0.06	-0.0647172	0.66965	7.94786	8.3125	-1.70962	5e-05	27.188
SPAC17G6.12.1	SPAC17G6.12.1_Intron3	I	3612486	3612597	+	111	405	2286	363	2286	2802	2346	2304	4	3	2	SPAC17G6.12.1_Exon3	66	SPAC17G6.12.1_Exon4	78	0.366167	0.243243	0.409091	0.435897	GTACGT	6	8.33	TAG	111	5.14	NA	NA	NA	3.68182	0.848485	17.4394	3.34615	0.512821	11.1154	2.065	1.87	0.06	-0.0647172	0.66965	7.94786	8.3125	-1.70962	5e-05	27.188
SPAC17G6.12.1	SPAC17G6.12.1_Intron4	I	3612674	3612876	+	202	593	2007	551	2007	2802	2346	2304	4	4	1	SPAC17G6.12.1_Exon4	78	SPAC17G6.12.1_Exon5	2008	0.366167	0.311881	0.435897	0.387948	GTGAGT	6	5.61	TAG	202	5.14	0.886139	0	0	3.34615	0.512821	11.1154	2.74502	1.60259	5.45817	2.065	1.87	0.06	-0.0647172	0.66965	7.94786	8.3125	-1.70962	5e-05	27.188
SPAC17G6.12.1	SPAC17G6.12.1_Intron2	I	3612323	3612421	+	98	242	2462	200	2462	2802	2346	2304	4	2	3	SPAC17G6.12.1_Exon2	88	SPAC17G6.12.1_Exon3	66	0.366167	0.244898	0.352273	0.409091	GTAAGT	6	9.48	TAG	98	5.14	1.18367	0.0306122	0	3.14773	0.738636	6.14773	3.68182	0.848485	17.4394	2.065	1.87	0.06	-0.0647172	0.66965	7.94786	8.3125	-1.70962	5e-05	27.188
SPAC17G6.15c.1	SPAC17G6.15c.1_Intron3	I	3620257	3620370	-	113	445	1389	287	914	1947	1602	969	5	3	3	SPAC17G6.15c.1_Exon4	111	SPAC17G6.15c.1_Exon3	75	0.360041	0.168142	0.405405	0.4	GTATGT	6	8.68	TAG	113	5.14	1.02655	0.150442	0	7.73874	27.2973	25.8739	5.53333	12.6133	104.053	12.09	29.02	86.18	-0.0304101	0.9487	87.2277	89.0858	1.4643	0.00535	32.2858
SPAC17G6.15c.1	SPAC17G6.15c.1_Intron4	I	3620480	3620528	-	48	287	1612	129	1137	1947	1602	969	5	2	4	SPAC17G6.15c.1_Exon5	27	SPAC17G6.15c.1_Exon4	111	0.360041	0.3125	0.444444	0.405405	GTAATT	6	4.16	TAG	48	5.14	4.58333	1.75	1.39583	6.66667	35.7407	84.7037	7.73874	27.2973	25.8739	12.09	29.02	86.18	-0.0304101	0.9487	87.2277	89.0858	1.4643	0.00535	32.2858
SPAC17G6.15c.1	SPAC17G6.15c.1_Intron1	I	3619703	3619807	-	104	1008	835	850	360	1947	1602	969	5	5	1	SPAC17G6.15c.1_Exon2	337	SPAC17G6.15c.1_Exon1	836	0.360041	0.278846	0.421365	0.37201	GTATGA	6	7	TAG	104	5.14	1.30769	0.269231	0.721154	4.48071	11.2819	37.1543	3.04904	18.0263	16.6304	12.09	29.02	86.18	-0.0304101	0.9487	87.2277	89.0858	1.4643	0.00535	32.2858
SPAC17G6.15c.1	SPAC17G6.15c.1_Intron2	I	3620143	3620183	-	40	632	1275	474	800	1947	1602	969	5	4	2	SPAC17G6.15c.1_Exon3	75	SPAC17G6.15c.1_Exon2	337	0.360041	0.25	0.4	0.421365	GTAAGA	6	7.8	TAG	40	5.14	1.325	0.1	0	5.53333	12.6133	104.053	4.48071	11.2819	37.1543	12.09	29.02	86.18	-0.0304101	0.9487	87.2277	89.0858	1.4643	0.00535	32.2858
SPAC17G6.15c.1	SPAC17G6.15c.1_Intron5	I	3620554	3620594	-	40	221	1686	63	1211	1947	1602	969	5	1	5	SPAC17G6.15c.1_Exon6	222	SPAC17G6.15c.1_Exon5	27	0.360041	0.325	0.36036	0.444444	GTATGT	6	8.68	CAG	40	4.79	2.15	0.15	0	1.91441	1.96847	16.8288	6.66667	35.7407	84.7037	12.09	29.02	86.18	-0.0304101	0.9487	87.2277	89.0858	1.4643	0.00535	32.2858
SPAC17H9.17c.1	SPAC17H9.17c.1_Intron2	I	2033082	2033131	-	49	177	1074	97	1074	1300	1193	1113	2	1	2	SPAC17H9.17c.1_Exon3	178	SPAC17H9.17c.1_Exon2	396	0.345385	0.265306	0.292135	0.335859	GTAAGT	6	9.48	CAG	49	4.79	1.02041	0	0	1.28652	0.853933	1.83146	0.997475	1.09091	5.7702	NA	NA	NA	-0.446329	0.24605	11.1594	15.2055	-0.0410746	0.8891	15.6446
SPAC17H9.17c.1	SPAC17H9.17c.1_Intron1	I	2032629	2032687	-	58	621	621	541	621	1300	1193	1113	2	2	1	SPAC17H9.17c.1_Exon2	396	SPAC17H9.17c.1_Exon1	622	0.345385	0.258621	0.335859	0.382637	GTACGC	6	7.24	CAG	58	4.79	0.896552	0.396552	0.913793	0.997475	1.09091	5.7702	0.977492	3.63826	3.52894	NA	NA	NA	-0.446329	0.24605	11.1594	15.2055	-0.0410746	0.8891	15.6446
SPAC17H9.20.1	SPAC17H9.20.1_Intron1	I	2036667	2036712	+	45	341	3832	265	2808	4218	3989	2889	5	1	5	SPAC17H9.20.1_Exon1	342	SPAC17H9.20.1_Exon2	114	0.335941	0.311111	0.345029	0.368421	GTAATG	6	2.25	AAG	45	3.03	0.711111	0	0.177778	2.44737	0.149123	3.47953	3.38596	0.22807	10.6404	0.225	0.165	0.08	-0.27842	0.38505	2.80926	3.40726	-2.29227	5e-05	16.6897
SPAC17H9.20.1	SPAC17H9.20.1_Intron3	I	2036959	2037007	+	48	633	3537	557	2513	4218	3989	2889	5	3	3	SPAC17H9.20.1_Exon3	97	SPAC17H9.20.1_Exon4	411	0.335941	0.25	0.412371	0.347932	GTAAGT	6	9.48	AAG	48	3.03	0.541667	0	0.291667	1.89691	0.123711	5.85567	2.47445	0.26764	4.7129	0.225	0.165	0.08	-0.27842	0.38505	2.80926	3.40726	-2.29227	5e-05	16.6897
SPAC17H9.20.1	SPAC17H9.20.1_Intron5	I	2039067	2039115	+	48	2741	1429	2665	405	4218	3989	2889	5	5	1	SPAC17H9.20.1_Exon5	1601	SPAC17H9.20.1_Exon6	1430	0.335941	0.25	0.336665	0.335664	GTATAC	6	2.65	CAG	48	4.79	1.39583	0	0	2.005	0.818239	2.65771	1.06643	1.26853	0.743357	0.225	0.165	0.08	-0.27842	0.38505	2.80926	3.40726	-2.29227	5e-05	16.6897
SPAC17H9.20.1	SPAC17H9.20.1_Intron2	I	2036825	2036863	+	38	499	3681	423	2657	4218	3989	2889	5	2	4	SPAC17H9.20.1_Exon2	114	SPAC17H9.20.1_Exon3	97	0.335941	0.236842	0.368421	0.412371	GTAGAG	6	-0.35	TAG	38	5.14	NA	NA	NA	3.38596	0.22807	10.6404	1.89691	0.123711	5.85567	0.225	0.165	0.08	-0.27842	0.38505	2.80926	3.40726	-2.29227	5e-05	16.6897
SPAC17H9.20.1	SPAC17H9.20.1_Intron4	I	2037417	2037467	+	50	1091	3077	1015	2053	4218	3989	2889	5	4	2	SPAC17H9.20.1_Exon4	411	SPAC17H9.20.1_Exon5	1601	0.335941	0.26	0.347932	0.336665	GTAAAG	6	2.64	TAG	50	5.14	0.4	0	0.04	2.47445	0.26764	4.7129	2.005	0.818239	2.65771	0.225	0.165	0.08	-0.27842	0.38505	2.80926	3.40726	-2.29227	5e-05	16.6897
SPAC1805.01c.1	SPAC1805.01c.1_Intron2	I	2773012	2773107	-	95	393	2398	106	2309	2886	2704	2328	3	2	2	SPAC1805.01c.1_Exon3	50	SPAC1805.01c.1_Exon2	2078	0.358281	0.178947	0.46	0.377286	GTGTGT	6	4.81	TAG	95	5.14	0.873684	0	0	3.98	0.92	0.94	3.59673	2.52406	2.77334	NA	NA	NA	0.228669	0.2124	15.2126	12.9827	-1.3806	5e-05	33.8039
SPAC1805.01c.1	SPAC1805.01c.1_Intron1	I	2770895	2770935	-	40	2565	281	2278	192	2886	2704	2328	3	3	1	SPAC1805.01c.1_Exon2	2078	SPAC1805.01c.1_Exon1	282	0.358281	0.225	0.377286	0.315603	GTAAGA	6	7.8	TAG	40	5.14	1.05	0.1	0	3.59673	2.52406	2.77334	1.32979	4.61702	1.85816	NA	NA	NA	0.228669	0.2124	15.2126	12.9827	-1.3806	5e-05	33.8039
SPAC1805.01c.1	SPAC1805.01c.1_Intron3	I	2773156	2773203	-	47	297	2542	10	2453	2886	2704	2328	3	1	3	SPAC1805.01c.1_Exon4	298	SPAC1805.01c.1_Exon3	50	0.358281	0.319149	0.33557	0.46	GTTTGT	6	3.87	CAG	47	4.79	1.46809	0	0	1.64094	0.271812	2.62752	3.98	0.92	0.94	NA	NA	NA	0.228669	0.2124	15.2126	12.9827	-1.3806	5e-05	33.8039
SPAC1805.07c.1	SPAC1805.07c.1_Intron1	I	2785684	2786012	-	328	332	526	136	149	1186	858	285	1	1	1	SPAC1805.07c.1_Exon2	333	SPAC1805.07c.1_Exon1	527	0.324621	0.295732	0.309309	0.352941	GTATGT	6	8.68	CAG	328	4.79	0.411585	0.115854	0.283537	0.18018	0.339339	1.33333	0.958254	1.43074	2.8482	1.39	3.645	0.465	-0.278094	0.69665	5.20732	6.31436	-0.294651	0.5774	7.74512
SPAC1805.11c.1	SPAC1805.11c.1_Intron1	I	2793252	2793352	-	100	192	414	124	236	706	606	360	1	1	1	SPAC1805.11c.1_Exon2	193	SPAC1805.11c.1_Exon1	415	0.434844	0.28	0.502591	0.443373	GTAAGT	6	9.48	TAG	100	5.14	5.2	1.09	0.19	6.3886	138.342	181.943	25.3229	424.412	419.087	5.645	2.97	0.145	-0.676652	0.24775	2697.64	4311.98	4.24511	5e-05	227.39
SPAC186.08c.1	SPAC186.08c.1_Intron1	I	5549819	5549955	-	136	57	936	57	936	1129	993	993	1	1	1	SPAC186.08c.1_Exon2	58	SPAC186.08c.1_Exon1	937	0.384411	0.338235	0.396552	0.390608	GTAAGT	6	9.48	TAG	136	5.14	NA	NA	NA	NA	NA	NA	NA	NA	NA	NA	NA	NA	Inf	1	0.234844	0	#NAME?	1	0.257743
SPAC1952.01.1	SPAC1952.01.1_Intron1	I	4968537	4968764	+	227	599	1124	392	835	1950	1723	1227	1	1	1	SPAC1952.01.1_Exon1	600	SPAC1952.01.1_Exon2	1125	0.338462	0.312775	0.34	0.343111	GTAAGT	6	9.48	TAG	227	5.14	0.0837004	0	0.0220264	0.736667	0.753333	4.96333	0.951111	2.07822	4.88356	1.45	8.95	4.585	-0.479581	0.24085	7.2363	10.0899	-0.078327	0.79035	10.6528
SPAC1952.02.1	SPAC1952.02.1_Intron2	I	4970179	4970243	+	64	358	494	288	402	916	771	609	2	2	1	SPAC1952.02.1_Exon2	94	SPAC1952.02.1_Exon3	495	0.343886	0.265625	0.382979	0.347475	GTAAAA	6	2.87	AAG	64	3.03	0.421875	0.40625	0.25	1.45745	12.883	14.5532	0.355556	10.6081	4.05859	0.21	22.385	0.49	-0.937248	5e-05	41.7993	80.0402	3.17781	5e-05	8.84489
SPAC1952.02.1	SPAC1952.02.1_Intron1	I	4970005	4970086	+	81	184	651	114	559	916	771	609	2	1	2	SPAC1952.02.1_Exon1	185	SPAC1952.02.1_Exon2	94	0.343886	0.259259	0.383784	0.382979	GTATGT	6	8.68	TAG	81	5.14	0.790123	1.01235	0.209877	1.41081	9.85946	6.72973	1.45745	12.883	14.5532	0.21	22.385	0.49	-0.937248	5e-05	41.7993	80.0402	3.17781	5e-05	8.84489
SPAC1952.03.1	SPAC1952.03.1_Intron1	I	4971548	4971594	+	46	728	712	432	543	1486	1440	975	1	1	1	SPAC1952.03.1_Exon1	729	SPAC1952.03.1_Exon2	713	0.33109	0.282609	0.315501	0.350631	GTAAGT	6	9.48	TAG	46	5.14	0.0217391	0.0869565	0	0.0727023	4.11248	1.12483	0.13324	3.49088	4.70266	NA	NA	NA	-0.162146	0.26125	15.8386	17.7226	1.29578	5e-05	7.21872
SPAC1952.07.1	SPAC1952.07.1_Intron1	I	4978754	4978880	+	126	163	1423	136	879	1712	1543	972	2	1	2	SPAC1952.07.1_Exon1	164	SPAC1952.07.1_Exon2	242	0.360981	0.293651	0.390244	0.392562	GTAAGA	6	7.8	AAG	126	3.03	0.730159	0.111111	0.015873	1.32317	1.03659	4.31707	1.24793	1.29339	3.5	NA	NA	NA	-0.258299	0.10775	17.1136	20.469	-0.373182	0.0245	26.5116
SPAC1952.07.1	SPAC1952.07.1_Intron2	I	4979121	4979164	+	43	530	1139	503	595	1712	1543	972	2	2	1	SPAC1952.07.1_Exon2	242	SPAC1952.07.1_Exon3	1140	0.360981	0.255814	0.392562	0.362281	GTAAGG	6	7.57	AAG	43	3.03	0.813953	0.209302	0	1.24793	1.29339	3.5	1.02982	2.43158	1.23772	NA	NA	NA	-0.258299	0.10775	17.1136	20.469	-0.373182	0.0245	26.5116
SPAC1952.15c.1	SPAC1952.15c.1_Intron1	I	4996763	4996903	-	140	319	1972	319	734	2431	2291	1053	1	1	1	SPAC1952.15c.1_Exon2	320	SPAC1952.15c.1_Exon1	1973	0.344714	0.292857	0.359375	0.346173	GTAAGT	6	9.48	TAG	140	5.14	NA	NA	NA	0.03125	0.021875	0.084375	0.0603142	0.307146	0.223517	NA	NA	NA	0.266442	1	0.0837067	0.069591	-2.21364	1	0.322793
SPAC19A8.03.1	SPAC19A8.03.1_Intron2	I	2484666	2484722	-	56	226	2259	24	1701	2541	2440	1680	2	1	2	SPAC19A8.03.1_Exon3	227	SPAC19A8.03.1_Exon2	577	0.37072	0.214286	0.343612	0.376083	GTAAGC	6	8.38	TAG	56	5.14	NA	NA	NA	1.29075	0.268722	0.127753	2.41421	1.27383	5.32582	NA	NA	NA	0.592351	5e-05	17.3827	11.5293	-0.366134	0.00815	14.86
SPAC19A8.03.1	SPAC19A8.03.1_Intron1	I	2484045	2484090	-	45	858	1638	656	1080	2541	2440	1680	2	2	1	SPAC19A8.03.1_Exon2	577	SPAC19A8.03.1_Exon1	1639	0.37072	0.244444	0.376083	0.38194	GTAAGT	6	9.48	TAG	45	5.14	1.04444	0.0888889	0	2.41421	1.27383	5.32582	1.31483	2.81147	3.41794	NA	NA	NA	0.592351	5e-05	17.3827	11.5293	-0.366134	0.00815	14.86
SPAC19A8.04.1	SPAC19A8.04.1_Intron1	I	2481645	2481977	-	332	233	1581	133	1499	2146	1814	1632	1	1	1	SPAC19A8.04.1_Exon2	234	SPAC19A8.04.1_Exon1	1582	0.39562	0.310241	0.41453	0.410872	GTATGT	6	8.68	TAG	332	5.14	2.9247	0.201807	0.493976	5.62821	10.7521	37.2521	11.1264	47.0537	108.267	0.68	0.755	0.035	0.309189	0.0523	294.783	237.918	1.12227	5e-05	109.292
SPAC19A8.16.1	SPAC19A8.16.1_Intron1	I	2472749	2472860	-	111	101	317	42	156	529	418	198	1	1	1	SPAC19A8.16.1_Exon2	102	SPAC19A8.16.1_Exon1	318	0.332703	0.324324	0.254902	0.361635	GTAAGT	6	9.48	AAG	111	3.03	0.144144	0.279279	0	0.519608	1.68627	0.166667	0.553459	1.42138	0.484277	NA	NA	NA	-1.14352	0.00125	5.05722	11.1724	0.151337	0.58505	10.0598
SPAC19B12.12c.1	SPAC19B12.12c.1_Intron1	I	4905699	4905773	-	74	621	1479	621	192	2174	1995	708	2	2	1	SPAC19B12.12c.1_Exon2	350	SPAC19B12.12c.1_Exon1	1480	0.339006	0.324324	0.411429	0.325676	GTTGGT	6	1.69	TAG	74	5.14	0.135135	0.0135135	0	0.725714	2.19429	3.01143	0.37973	0.870946	0.704054	1.225	11.14	20.31	-0.48087	0.22235	5.26686	7.35035	0.4681	0.2214	5.31369
SPAC19B12.12c.1	SPAC19B12.12c.1_Intron2	I	4906122	4906227	-	105	167	1902	167	615	2174	1995	708	2	1	2	SPAC19B12.12c.1_Exon3	168	SPAC19B12.12c.1_Exon2	350	0.339006	0.27619	0.357143	0.411429	GTACGA	6	6.65	CAG	105	4.79	0.171429	0.047619	0.114286	0.619048	0.892857	4.64881	0.725714	2.19429	3.01143	1.225	11.14	20.31	-0.48087	0.22235	5.26686	7.35035	0.4681	0.2214	5.31369
SPAC19D5.05c.1	SPAC19D5.05c.1_Intron2	I	5219470	5219516	-	46	97	682	19	572	825	740	552	2	1	2	SPAC19D5.05c.1_Exon3	98	SPAC19D5.05c.1_Exon2	510	0.344242	0.173913	0.377551	0.384314	GTAAGT	6	9.48	TAG	46	5.14	NA	NA	NA	1.21429	3.63265	1.11224	2.04706	16.1412	34.9725	NA	NA	NA	-1.3264	5e-05	36.1422	90.6361	1.53238	5e-05	31.3335
SPAC19D5.05c.1	SPAC19D5.05c.1_Intron1	I	5218922	5218961	-	39	652	134	574	24	825	740	552	2	2	1	SPAC19D5.05c.1_Exon2	510	SPAC19D5.05c.1_Exon1	135	0.344242	0.205128	0.384314	0.274074	GTATGT	6	8.68	TAG	39	5.14	0.179487	0.025641	0.769231	2.04706	16.1412	34.9725	1.25185	12.5704	6.12593	NA	NA	NA	-1.3264	5e-05	36.1422	90.6361	1.53238	5e-05	31.3335
SPAC19D5.10c.1	SPAC19D5.10c.1_Intron1	I	5221641	5221710	-	69	9	255	9	255	333	264	264	1	1	1	SPAC19D5.10c.1_Exon2	10	SPAC19D5.10c.1_Exon1	256	0.33033	0.217391	0.4	0.359375	GTATAT	6	3.74	TAG	69	5.14	NA	NA	NA	NA	NA	NA	0.445312	0.390625	0.988281	1.39	1.76	5.915	0.510563	0.48265	4.3159	3.02954	-2.09463	0.0122	12.9397
SPAC19D5.11c.1	SPAC19D5.11c.1_Intron1	I	5219847	5219896	-	49	216	300	117	213	565	516	330	1	1	1	SPAC19D5.11c.1_Exon2	217	SPAC19D5.11c.1_Exon1	301	0.359292	0.22449	0.336406	0.398671	GTATGA	6	7	TAG	49	5.14	NA	NA	NA	0.737327	0.921659	2.73272	0.830565	2.08306	5.08306	1.365	10.915	17.67	-0.797004	0.38955	3.2764	5.69271	0.774837	0.36955	3.32713
SPAC1A6.06c.1	SPAC1A6.06c.1_Intron1	I	1083142	1083193	-	51	423	1227	198	360	1701	1650	558	1	1	1	SPAC1A6.06c.1_Exon2	424	SPAC1A6.06c.1_Exon1	1228	0.333333	0.235294	0.316038	0.343648	GTAAGA	6	7.8	AAG	51	3.03	NA	NA	NA	0	0.0330189	0.0683962	0.0570033	0.499186	0.139251	NA	NA	NA	-1.10426	5e-05	2.03957	4.38482	0.433978	0.04665	3.24573
SPAC1B2.03c.1	SPAC1B2.03c.1_Intron1	I	2812368	2812411	-	43	106	2104	74	931	2253	2210	1005	1	1	1	SPAC1B2.03c.1_Exon2	107	SPAC1B2.03c.1_Exon1	2105	0.386152	0.302326	0.46729	0.384323	GTAAGC	6	8.38	TAG	43	5.14	1.90698	0.186047	0	1.66355	3.28037	55.3738	11.6048	38.1891	59.285	NA	NA	NA	-0.933454	5e-05	124.54	237.852	1.03341	5e-05	116.204
SPAC1B3.02c.1	SPAC1B3.02c.1_Intron2	I	4929319	4929362	-	43	293	1148	154	359	1484	1252	324	3	2	2	SPAC1B3.02c.1_Exon3	48	SPAC1B3.02c.1_Exon2	72	0.342318	0.232558	0.416667	0.361111	GTATGC	6	7.58	TAG	43	5.14	1.11628	0.186047	0.581395	1.20833	4.3125	49.0625	3.98611	30.4167	13.1111	NA	NA	NA	-0.0216963	0.95645	64.5471	65.5252	1.91718	5e-05	17.3492
SPAC1B3.02c.1	SPAC1B3.02c.1_Intron3	I	4929409	4929450	-	41	205	1238	66	449	1484	1252	324	3	1	3	SPAC1B3.02c.1_Exon4	206	SPAC1B3.02c.1_Exon3	48	0.342318	0.243902	0.393204	0.416667	GTGAGT	6	5.61	TAG	41	5.14	0.756098	0.097561	0	1.05825	1.16505	3.9466	1.20833	4.3125	49.0625	NA	NA	NA	-0.0216963	0.95645	64.5471	65.5252	1.91718	5e-05	17.3492
SPAC1B3.02c.1	SPAC1B3.02c.1_Intron1	I	4929100	4929248	-	148	407	929	268	140	1484	1252	324	3	3	1	SPAC1B3.02c.1_Exon2	72	SPAC1B3.02c.1_Exon1	930	0.342318	0.263514	0.361111	0.350538	GTATGA	6	7	AAG	148	3.03	1.19595	0.337838	0.0405405	3.98611	30.4167	13.1111	1.59247	9.77957	4.71183	NA	NA	NA	-0.0216963	0.95645	64.5471	65.5252	1.91718	5e-05	17.3492
SPAC1F12.09.1	SPAC1F12.09.1_Intron1	I	3818907	3818953	+	46	240	1573	240	1467	1859	1771	1665	2	1	2	SPAC1F12.09.1_Exon1	241	SPAC1F12.09.1_Exon2	725	0.360409	0.326087	0.360996	0.365517	GTGCGT	6	4.46	TAG	46	5.14	0.26087	0	0	0.40249	0.20332	0.688797	1.43586	2.16966	4.13793	NA	NA	NA	-0.00260428	0.996	14.2804	14.3063	-0.0105778	0.97915	14.4115
SPAC1F12.09.1	SPAC1F12.09.1_Intron2	I	3819677	3819719	+	42	1010	807	1010	701	1859	1771	1665	2	2	1	SPAC1F12.09.1_Exon2	725	SPAC1F12.09.1_Exon3	808	0.360409	0.309524	0.365517	0.361386	GTATGT	6	8.68	AAG	42	3.03	0.571429	0.190476	0.52381	1.43586	2.16966	4.13793	1.05817	4.20297	4.71906	NA	NA	NA	-0.00260428	0.996	14.2804	14.3063	-0.0105778	0.97915	14.4115
SPAC20G4.08.1	SPAC20G4.08.1_Intron1	I	4831286	4831327	+	41	2396	1146	2230	1043	3583	3500	3231	2	1	2	SPAC20G4.08.1_Exon1	2397	SPAC20G4.08.1_Exon2	642	0.374267	0.195122	0.382979	0.392523	GTAAGT	6	9.48	CAG	41	4.79	NA	NA	NA	6.1239	1.15269	10.3663	4.45327	2.26791	5.69003	NA	NA	NA	-0.011711	0.92875	9.76938	9.84901	-2.38159	5e-05	51.3244
SPAC20G4.08.1	SPAC20G4.08.1_Intron2	I	4831968	4832010	+	42	3078	463	2912	360	3583	3500	3231	2	2	1	SPAC20G4.08.1_Exon2	642	SPAC20G4.08.1_Exon3	464	0.374267	0.166667	0.392523	0.340517	GTAAGT	6	9.48	TAG	42	5.14	0.97619	0	0	4.45327	2.26791	5.69003	3.1681	4.15302	6.72414	NA	NA	NA	-0.011711	0.92875	9.76938	9.84901	-2.38159	5e-05	51.3244
SPAC20G4.09.1	SPAC20G4.09.1_Intron1	I	4826297	4826342	+	45	68	7	68	7	120	75	75	1	1	1	SPAC20G4.09.1_Exon1	69	SPAC20G4.09.1_Exon2	8	0.3	0.333333	0.275362	0.5	GTATGC	6	7.58	TAG	45	5.14	0.0444444	0.0888889	0.711111	0	0.217391	0.768116	NA	NA	NA	0.275	1.39	1.535	0	1	0	0	0	1	0
SPAC20H4.09.1	SPAC20H4.09.1_Intron2	I	2126278	2126326	+	48	212	2033	212	2033	2293	1944	1944	8	2	7	SPAC20H4.09.1_Exon2	79	SPAC20H4.09.1_Exon3	66	0.349324	0.208333	0.392405	0.424242	GTAAGT	6	9.48	AAG	48	3.03	NA	NA	NA	3.1519	2.18987	1.27848	3.63636	1.28788	3.10606	2.155	0.225	1.235	-0.583764	0.20385	2.91557	4.36973	-1.95957	5e-05	16.9959
SPAC20H4.09.1	SPAC20H4.09.1_Intron3	I	2126391	2126439	+	48	325	1920	325	1920	2293	1944	1944	8	3	6	SPAC20H4.09.1_Exon3	66	SPAC20H4.09.1_Exon4	258	0.349324	0.291667	0.424242	0.372093	GTTAGT	6	4.67	AAG	48	3.03	1.58333	0	0	3.63636	1.28788	3.10606	2.74806	0.484496	1.44574	2.155	0.225	1.235	-0.583764	0.20385	2.91557	4.36973	-1.95957	5e-05	16.9959
SPAC20H4.09.1	SPAC20H4.09.1_Intron5	I	2127504	2127550	+	46	1438	809	1438	809	2293	1944	1944	8	5	4	SPAC20H4.09.1_Exon5	773	SPAC20H4.09.1_Exon6	103	0.349324	0.282609	0.363519	0.417476	GTTTGT	6	3.87	AAG	46	3.03	1.91304	0.108696	0	3.84217	1.70505	0.631307	3.2233	2.1068	1.36893	2.155	0.225	1.235	-0.583764	0.20385	2.91557	4.36973	-1.95957	5e-05	16.9959
SPAC20H4.09.1	SPAC20H4.09.1_Intron6	I	2127652	2127700	+	48	1586	659	1586	659	2293	1944	1944	8	6	3	SPAC20H4.09.1_Exon6	103	SPAC20H4.09.1_Exon7	170	0.349324	0.395833	0.417476	0.364706	GTACGT	6	8.33	TAG	48	5.14	NA	NA	NA	3.2233	2.1068	1.36893	3.09412	3.58235	1.41765	2.155	0.225	1.235	-0.583764	0.20385	2.91557	4.36973	-1.95957	5e-05	16.9959
SPAC20H4.09.1	SPAC20H4.09.1_Intron7	I	2127869	2127911	+	42	1803	448	1803	448	2293	1944	1944	8	7	2	SPAC20H4.09.1_Exon7	170	SPAC20H4.09.1_Exon8	322	0.349324	0.214286	0.364706	0.354037	GTATGC	6	7.58	TAG	42	5.14	NA	NA	NA	3.09412	3.58235	1.41765	2.25776	2.52174	0.322981	2.155	0.225	1.235	-0.583764	0.20385	2.91557	4.36973	-1.95957	5e-05	16.9959
SPAC20H4.09.1	SPAC20H4.09.1_Intron4	I	2126696	2126732	+	36	630	1627	630	1627	2293	1944	1944	8	4	5	SPAC20H4.09.1_Exon4	258	SPAC20H4.09.1_Exon5	773	0.349324	0.25	0.372093	0.363519	GTATTT	6	3.36	AAG	36	3.03	NA	NA	NA	2.74806	0.484496	1.44574	3.84217	1.70505	0.631307	2.155	0.225	1.235	-0.583764	0.20385	2.91557	4.36973	-1.95957	5e-05	16.9959
SPAC20H4.09.1	SPAC20H4.09.1_Intron8	I	2128232	2128270	+	38	2166	89	2166	89	2293	1944	1944	8	8	1	SPAC20H4.09.1_Exon8	322	SPAC20H4.09.1_Exon9	90	0.349324	0.263158	0.354037	0.266667	GTAAGC	6	8.38	TAG	38	5.14	0.473684	0	0	2.25776	2.52174	0.322981	1.9	4.15556	0.3	2.155	0.225	1.235	-0.583764	0.20385	2.91557	4.36973	-1.95957	5e-05	16.9959
SPAC20H4.09.1	SPAC20H4.09.1_Intron1	I	2126157	2126200	+	43	91	2159	91	2159	2293	1944	1944	8	1	8	SPAC20H4.09.1_Exon1	92	SPAC20H4.09.1_Exon2	79	0.349324	0.372093	0.326087	0.392405	GTATGT	6	8.68	TAG	43	5.14	NA	NA	NA	2.6413	0.608696	1.19565	3.1519	2.18987	1.27848	2.155	0.225	1.235	-0.583764	0.20385	2.91557	4.36973	-1.95957	5e-05	16.9959
SPAC20H4.10.1	SPAC20H4.10.1_Intron3	I	2131509	2131549	+	40	3077	164	3047	74	3281	3153	3033	3	3	1	SPAC20H4.10.1_Exon3	2198	SPAC20H4.10.1_Exon4	165	0.35416	0.25	0.369882	0.266667	GTAAGT	6	9.48	TAG	40	5.14	2.375	0	0	5.48135	3.60146	10.2762	1.95758	3.55758	0.975758	NA	NA	NA	0.133201	0.39715	19.4905	17.7715	-1.57161	5e-05	52.8233
SPAC20H4.10.1	SPAC20H4.10.1_Intron1	I	2128480	2128522	+	42	48	3191	18	3101	3281	3153	3033	3	1	3	SPAC20H4.10.1_Exon1	49	SPAC20H4.10.1_Exon2	745	0.35416	0.333333	0.44898	0.339597	GTAAGA	6	7.8	TAG	42	5.14	NA	NA	NA	2	0.102041	2.89796	5.91812	0.755705	11.0215	NA	NA	NA	0.133201	0.39715	19.4905	17.7715	-1.57161	5e-05	52.8233
SPAC20H4.10.1	SPAC20H4.10.1_Intron2	I	2129266	2129312	+	46	834	2401	804	2311	3281	3153	3033	3	2	2	SPAC20H4.10.1_Exon2	745	SPAC20H4.10.1_Exon3	2198	0.35416	0.217391	0.339597	0.369882	GTATGA	6	7	TAG	46	5.14	0.934783	0	0	5.91812	0.755705	11.0215	5.48135	3.60146	10.2762	NA	NA	NA	0.133201	0.39715	19.4905	17.7715	-1.57161	5e-05	52.8233
SPAC212.01c.1	SPAC212.01c.1_Intron1	I	29227	29285	+	58	490	372	490	353	920	862	843	1	1	1	SPAC212.01c.1_Exon1	491	SPAC212.01c.1_Exon2	373	0.348913	0.206897	0.338086	0.38874	GTATGT	6	8.68	TAG	58	5.14	0.137931	0	0	0.364562	0.386965	1.12627	0.273458	0.458445	0.793566	NA	NA	NA	-0.0845612	0.78735	2.78414	2.9522	-0.47271	0.11285	4.09681
SPAC212.04c.1	SPAC212.04c.1_Intron1	I	22076	22131	+	55	696	919	490	377	1670	1615	867	1	1	1	SPAC212.04c.1_Exon1	697	SPAC212.04c.1_Exon2	920	0.320958	0.327273	0.312769	0.328261	GTACGT	6	8.33	TAG	55	5.14	0.454545	0.0545455	0.272727	0.400287	0.298422	0.631277	0.346739	0.436957	0.676087	NA	NA	NA	0.167907	0.49825	2.32813	2.07234	-0.901543	0.00015	3.87127
SPAC212.06c.1	SPAC212.06c.1_Intron1	I	18306	18348	+	42	265	626	235	209	933	891	444	1	1	1	SPAC212.06c.1_Exon1	266	SPAC212.06c.1_Exon2	627	0.390139	0.452381	0.413534	0.376396	GTGCAT	6	-0.47	CAG	42	4.79	NA	NA	NA	NA	NA	NA	NA	NA	NA	NA	NA	NA	1.09497	1	0.538898	0.252283	-2.24935	0.0045	1.19953
SPAC222.03c.1	SPAC222.03c.1_Intron1	I	948132	948480	-	348	320	257	101	169	925	577	270	1	1	1	SPAC222.03c.1_Exon2	321	SPAC222.03c.1_Exon1	258	0.341622	0.298851	0.358255	0.379845	GTATGC	6	7.58	TAG	348	5.14	1.04885	0.591954	0.0431034	1.06854	11.4393	22.3614	3.04651	40.8295	21	1.215	2.925	0.845	-0.289933	0.36415	146.002	178.499	3.04536	5e-05	21.6219
SPAC222.15.1	SPAC222.15.1_Intron3	I	978006	978048	+	42	298	589	298	589	929	651	651	4	3	2	SPAC222.15.1_Exon3	103	SPAC222.15.1_Exon4	142	0.34338	0.285714	0.446602	0.373239	GTACTG	6	1.1	GAG	42	-2.55	NA	NA	NA	NA	NA	NA	0.204225	0.0492958	0.147887	0.18	0.04	0.71	-0.377471	0.47535	1.02617	1.33306	-1.71498	0.00065	4.37633
SPAC222.15.1	SPAC222.15.1_Intron4	I	978189	978332	+	143	481	305	481	305	929	651	651	4	4	1	SPAC222.15.1_Exon4	142	SPAC222.15.1_Exon5	306	0.34338	0.286713	0.373239	0.333333	GTCAGT	6	1.72	AAG	143	3.03	NA	NA	NA	0.204225	0.0492958	0.147887	NA	NA	NA	0.18	0.04	0.71	-0.377471	0.47535	1.02617	1.33306	-1.71498	0.00065	4.37633
SPAC222.15.1	SPAC222.15.1_Intron2	I	977857	977904	+	47	149	733	149	733	929	651	651	4	2	3	SPAC222.15.1_Exon2	55	SPAC222.15.1_Exon3	103	0.34338	0.255319	0.363636	0.446602	GTAAGA	6	7.8	AAG	47	3.03	NA	NA	NA	NA	NA	NA	NA	NA	NA	0.18	0.04	0.71	-0.377471	0.47535	1.02617	1.33306	-1.71498	0.00065	4.37633
SPAC222.15.1	SPAC222.15.1_Intron1	I	977757	977803	+	46	49	834	49	834	929	651	651	4	1	4	SPAC222.15.1_Exon1	50	SPAC222.15.1_Exon2	55	0.34338	0.347826	0.42	0.363636	GTATAA	6	2.07	CAG	46	4.79	NA	NA	NA	NA	NA	NA	NA	NA	NA	0.18	0.04	0.71	-0.377471	0.47535	1.02617	1.33306	-1.71498	0.00065	4.37633
SPAC227.11c.1	SPAC227.11c.1_Intron1	I	515082	515221	-	139	2031	1116	453	531	3286	3096	933	2	2	1	SPAC227.11c.1_Exon2	262	SPAC227.11c.1_Exon1	1117	0.380402	0.258993	0.320611	0.366159	GTACGA	6	6.65	TAG	139	5.14	0.553957	0.223022	0.136691	1.62214	3.48855	11.8168	0.659803	3.26858	4.39749	NA	NA	NA	-0.188636	0.55675	17.066	19.4498	1.21617	0.0001	8.37169
SPAC227.11c.1	SPAC227.11c.1_Intron2	I	515482	515533	-	51	1719	1516	141	931	3286	3096	933	2	1	2	SPAC227.11c.1_Exon3	1720	SPAC227.11c.1_Exon2	262	0.380402	0.372549	0.409884	0.320611	GTATGC	6	7.58	TAG	51	5.14	0.941176	0.0392157	0.27451	1.91105	0.186047	0.755814	1.62214	3.48855	11.8168	NA	NA	NA	-0.188636	0.55675	17.066	19.4498	1.21617	0.0001	8.37169
SPAC227.19c.1	SPAC227.19c.1_Intron1	I	501248	501365	-	117	120	132	120	132	369	252	252	1	1	1	SPAC227.19c.1_Exon2	121	SPAC227.19c.1_Exon1	133	0.330623	0.307692	0.322314	0.360902	GTAAGT	6	9.48	CAG	117	4.79	1.45299	0.837607	0	2.7686	3.79339	4.09091	2.33083	4.06015	5.52632	1.725	3.155	0.105	-0.48325	0.43005	56.6979	79.2575	0.235044	0.71365	67.3418
SPAC22A12.08c.1	SPAC22A12.08c.1_Intron2	I	1171270	1171361	-	91	810	1075	765	1075	1976	1758	1713	4	3	2	SPAC22A12.08c.1_Exon3	496	SPAC22A12.08c.1_Exon2	768	0.374494	0.296703	0.391129	0.390625	GTAAGT	6	9.48	TAG	91	5.14	1.67033	0	0	4.62702	3.04435	17.2319	3.63542	4.66536	7.74479	1.385	2.625	0.84	-0.0591688	0.6616	21.3185	22.211	-0.597685	5e-05	33.6116
SPAC22A12.08c.1	SPAC22A12.08c.1_Intron3	I	1171856	1171899	-	43	272	1661	227	1661	1976	1758	1713	4	2	3	SPAC22A12.08c.1_Exon4	58	SPAC22A12.08c.1_Exon3	496	0.374494	0.302326	0.396552	0.391129	GTAAGC	6	8.38	AAG	43	3.03	1.04651	0	0	4.63793	0.362069	4.63793	4.62702	3.04435	17.2319	1.385	2.625	0.84	-0.0591688	0.6616	21.3185	22.211	-0.597685	5e-05	33.6116
SPAC22A12.08c.1	SPAC22A12.08c.1_Intron1	I	1170461	1170503	-	42	1668	266	1623	266	1976	1758	1713	4	4	1	SPAC22A12.08c.1_Exon2	768	SPAC22A12.08c.1_Exon1	267	0.374494	0.261905	0.390625	0.378277	GTATGC	6	7.58	TAG	42	5.14	0.333333	0	0	3.63542	4.66536	7.74479	2.93633	10.1798	2.15356	1.385	2.625	0.84	-0.0591688	0.6616	21.3185	22.211	-0.597685	5e-05	33.6116
SPAC22A12.08c.1	SPAC22A12.08c.1_Intron4	I	1171956	1171998	-	42	173	1761	128	1761	1976	1758	1713	4	1	4	SPAC22A12.08c.1_Exon5	174	SPAC22A12.08c.1_Exon4	58	0.374494	0.261905	0.367816	0.396552	GTAATA	6	2.48	AAG	42	3.03	4	0	0	1.54598	0.431034	18.0747	4.63793	0.362069	4.63793	1.385	2.625	0.84	-0.0591688	0.6616	21.3185	22.211	-0.597685	5e-05	33.6116
SPAC22A12.10.1	SPAC22A12.10.1_Intron1	I	1174707	1174757	+	50	2499	2044	137	1024	4593	4543	1161	1	1	1	SPAC22A12.10.1_Exon1	2500	SPAC22A12.10.1_Exon2	2045	0.386893	0.36	0.3872	0.387775	GTATGA	6	7	TAG	50	5.14	3.92	0.92	9.68	0.3208	0.748	2.5988	3.27873	19.6694	31.1355	9.47	1.855	1	-0.0478321	0.9078	12.003	12.4076	1.08841	0.0164	5.83507
SPAC22E12.01.1	SPAC22E12.01.1_Intron1	I	5019670	5019721	+	51	300	1715	179	946	2066	2015	1125	1	1	1	SPAC22E12.01.1_Exon1	301	SPAC22E12.01.1_Exon2	1716	0.352856	0.372549	0.41196	0.342075	GTATGA	6	7	TAG	51	5.14	0.647059	0	0	1.99336	1.78073	4.19601	1.56702	2.49009	3.13345	NA	NA	NA	-0.170429	0.23015	13.9614	15.7121	-0.202768	0.14745	18.0831
SPAC22E12.02.1	SPAC22E12.02.1_Intron1	I	5022491	5022725	+	234	540	1426	308	352	2200	1966	660	1	1	1	SPAC22E12.02.1_Exon1	541	SPAC22E12.02.1_Exon2	1427	0.375455	0.316239	0.358595	0.391731	GTATGT	6	8.68	TAG	234	5.14	0.123932	0.0299145	0.115385	0.887246	1.95564	5.12754	0.496847	2.39594	2.32446	NA	NA	NA	-0.570317	0.1359	3.18705	4.7323	-0.105018	0.7137	5.08962
SPAC22E12.13c.1	SPAC22E12.13c.1_Intron2	I	5044617	5044667	-	50	101	1232	5	821	1383	1086	579	2	1	2	SPAC22E12.13c.1_Exon3	102	SPAC22E12.13c.1_Exon2	140	0.375994	0.3	0.45098	0.435714	GTTTGT	6	3.87	TAG	50	5.14	0.46	0	0.24	0.0588235	0.0196078	6.98039	6.9	16.0643	63.3571	NA	NA	NA	-1.15364	5e-05	56.0443	124.684	0.939992	0.0001	64.99
SPAC22E12.13c.1	SPAC22E12.13c.1_Intron1	I	5044231	5044478	-	247	290	846	194	435	1383	1086	579	2	2	1	SPAC22E12.13c.1_Exon2	140	SPAC22E12.13c.1_Exon1	847	0.375994	0.283401	0.435714	0.390791	GTATGT	6	8.68	TAG	247	5.14	1.92713	0.0607287	0	6.9	16.0643	63.3571	7.50885	24.0248	17.6434	NA	NA	NA	-1.15364	5e-05	56.0443	124.684	0.939992	0.0001	64.99
SPAC22F3.04.1	SPAC22F3.04.1_Intron1	I	698177	698222	-	45	4533	218	4533	145	4796	4537	4464	6	6	1	SPAC22F3.04.1_Exon2	220	SPAC22F3.04.1_Exon1	219	0.359675	0.244444	0.422727	0.378995	GTAAGT	6	9.48	TAG	45	5.14	NA	NA	NA	NA	NA	NA	NA	NA	NA	NA	NA	NA	0.204516	0.24195	3.31226	2.87448	-3.3629	5e-05	29.5729
SPAC22F3.04.1	SPAC22F3.04.1_Intron2	I	698441	698479	-	38	4276	482	4276	409	4796	4537	4464	6	5	2	SPAC22F3.04.1_Exon3	363	SPAC22F3.04.1_Exon2	220	0.359675	0.394737	0.363636	0.422727	GTAAGT	6	9.48	CAG	38	4.79	NA	NA	NA	NA	NA	NA	NA	NA	NA	NA	NA	NA	0.204516	0.24195	3.31226	2.87448	-3.3629	5e-05	29.5729
SPAC22F3.04.1	SPAC22F3.04.1_Intron3	I	698841	698883	-	42	3872	882	3872	809	4796	4537	4464	6	4	3	SPAC22F3.04.1_Exon4	222	SPAC22F3.04.1_Exon3	363	0.359675	0.285714	0.414414	0.363636	GTACGT	6	8.33	TAG	42	5.14	NA	NA	NA	NA	NA	NA	NA	NA	NA	NA	NA	NA	0.204516	0.24195	3.31226	2.87448	-3.3629	5e-05	29.5729
SPAC22F3.04.1	SPAC22F3.04.1_Intron5	I	699363	699409	-	46	3346	1404	3346	1331	4796	4537	4464	6	2	5	SPAC22F3.04.1_Exon6	3149	SPAC22F3.04.1_Exon5	217	0.359675	0.173913	0.358527	0.354839	GTAAAT	6	4.54	TAG	46	5.14	NA	NA	NA	NA	NA	NA	NA	NA	NA	NA	NA	NA	0.204516	0.24195	3.31226	2.87448	-3.3629	5e-05	29.5729
SPAC22F3.04.1	SPAC22F3.04.1_Intron6	I	702557	702602	-	45	153	4598	153	4525	4796	4537	4464	6	1	6	SPAC22F3.04.1_Exon7	154	SPAC22F3.04.1_Exon6	3149	0.359675	0.177778	0.357143	0.358527	GTAAGA	6	7.8	AAG	45	3.03	NA	NA	NA	NA	NA	NA	NA	NA	NA	NA	NA	NA	0.204516	0.24195	3.31226	2.87448	-3.3629	5e-05	29.5729
SPAC22F3.04.1	SPAC22F3.04.1_Intron4	I	699104	699147	-	43	3608	1145	3608	1072	4796	4537	4464	6	3	4	SPAC22F3.04.1_Exon5	217	SPAC22F3.04.1_Exon4	222	0.359675	0.372093	0.354839	0.414414	GTAAGT	6	9.48	TAG	43	5.14	NA	NA	NA	NA	NA	NA	NA	NA	NA	NA	NA	NA	0.204516	0.24195	3.31226	2.87448	-3.3629	5e-05	29.5729
SPAC22F3.05c.1	SPAC22F3.05c.1_Intron1	I	697355	697400	+	45	165	5640	65	668	5850	5579	561	6	1	6	SPAC22F3.05c.1_Exon1	166	SPAC22F3.05c.1_Exon2	56	0.355385	0.266667	0.355422	0.446429	GTAAGA	6	7.8	TAG	45	5.14	0.955556	0	0	0.728916	0.0240964	1.14458	1.30357	0.232143	4.07143	NA	NA	NA	0.131727	1	0.705532	0.643966	-3.61159	5e-05	7.87156
SPAC22F3.05c.1	SPAC22F3.05c.1_Intron4	I	697766	697804	+	38	576	5236	476	264	5850	5579	561	6	4	3	SPAC22F3.05c.1_Exon4	147	SPAC22F3.05c.1_Exon5	82	0.355385	0.315789	0.367347	0.378049	GTAGGC	6	5.39	TAG	38	5.14	NA	NA	NA	2.30612	0.190476	2.26531	3.26829	0.0731707	1.9878	NA	NA	NA	0.131727	1	0.705532	0.643966	-3.61159	5e-05	7.87156
SPAC22F3.05c.1	SPAC22F3.05c.1_Intron5	I	697885	697927	+	42	695	5113	595	141	5850	5579	561	6	5	2	SPAC22F3.05c.1_Exon5	82	SPAC22F3.05c.1_Exon6	3527	0.355385	0.333333	0.378049	0.356961	GTCAGT	6	1.72	AAG	42	3.03	NA	NA	NA	3.26829	0.0731707	1.9878	3.78225	0.518004	0.0963992	NA	NA	NA	0.131727	1	0.705532	0.643966	-3.61159	5e-05	7.87156
SPAC22F3.05c.1	SPAC22F3.05c.1_Intron2	I	697455	697495	+	40	265	5545	165	573	5850	5579	561	6	2	5	SPAC22F3.05c.1_Exon2	56	SPAC22F3.05c.1_Exon3	74	0.355385	0.3	0.446429	0.418919	GTAAGT	6	9.48	TAG	40	5.14	0.375	0	0	1.30357	0.232143	4.07143	2.31081	0.378378	3.43243	NA	NA	NA	0.131727	1	0.705532	0.643966	-3.61159	5e-05	7.87156
SPAC22F3.05c.1	SPAC22F3.05c.1_Intron3	I	697568	697620	+	52	378	5420	278	448	5850	5579	561	6	3	4	SPAC22F3.05c.1_Exon3	74	SPAC22F3.05c.1_Exon4	147	0.355385	0.346154	0.418919	0.367347	GTACGT	6	8.33	AAG	52	3.03	1.19231	0	0	2.31081	0.378378	3.43243	2.30612	0.190476	2.26531	NA	NA	NA	0.131727	1	0.705532	0.643966	-3.61159	5e-05	7.87156
SPAC22F3.05c.1	SPAC22F3.05c.1_Intron6	I	701453	701507	+	54	4263	1533	4163	-3385	5850	5579	561	6	6	1	SPAC22F3.05c.1_Exon6	3527	SPAC22F3.05c.1_Exon7	1534	0.355385	0.277778	0.356961	0.353977	GTATGT	6	8.68	TAG	54	5.14	NA	NA	NA	3.78225	0.518004	0.0963992	2.73207	0.802477	0.0580183	NA	NA	NA	0.131727	1	0.705532	0.643966	-3.61159	5e-05	7.87156
SPAC22H10.08.1	SPAC22H10.08.1_Intron1	I	2387265	2387321	+	56	1563	333	1359	120	1952	1896	1479	1	1	1	SPAC22H10.08.1_Exon1	1564	SPAC22H10.08.1_Exon2	334	0.350922	0.214286	0.360614	0.329341	GTAAGT	6	9.48	TAG	56	5.14	0.642857	0	0.714286	2.68542	2.6023	6.27749	2.22156	1.76647	2.52395	4.785	1.145	3.67	-0.230025	0.24785	12.6538	14.8411	-0.878155	0.0001	27.2783
SPAC22H10.10.1	SPAC22H10.10.1_Intron1	I	2390240	2390278	+	38	324	1665	155	1512	2027	1858	1536	4	1	4	SPAC22H10.10.1_Exon1	325	SPAC22H10.10.1_Exon2	270	0.329058	0.289474	0.313846	0.322222	GTAAGA	6	7.8	TAG	38	5.14	NA	NA	NA	1.95077	0.381538	0.270769	1.66296	0.3	0.688889	NA	NA	NA	-0.598344	0.00155	4.08943	6.19131	-1.60481	5e-05	18.8312
SPAC22H10.10.1	SPAC22H10.10.1_Intron2	I	2390547	2390589	+	42	631	1354	462	1201	2027	1858	1536	4	2	3	SPAC22H10.10.1_Exon2	270	SPAC22H10.10.1_Exon3	101	0.329058	0.285714	0.322222	0.29703	GTATGT	6	8.68	TAG	42	5.14	0.452381	0	0	1.66296	0.3	0.688889	1.83168	0.50495	0.80198	NA	NA	NA	-0.598344	0.00155	4.08943	6.19131	-1.60481	5e-05	18.8312
SPAC22H10.10.1	SPAC22H10.10.1_Intron3	I	2390689	2390735	+	46	773	1208	604	1055	2027	1858	1536	4	3	2	SPAC22H10.10.1_Exon3	101	SPAC22H10.10.1_Exon4	277	0.329058	0.326087	0.29703	0.32491	GCATGT	6	0.64	CAG	46	4.79	NA	NA	NA	1.83168	0.50495	0.80198	1.58484	0.501805	1.213	NA	NA	NA	-0.598344	0.00155	4.08943	6.19131	-1.60481	5e-05	18.8312
SPAC22H10.10.1	SPAC22H10.10.1_Intron4	I	2391011	2391054	+	43	1095	889	926	736	2027	1858	1536	4	4	1	SPAC22H10.10.1_Exon4	277	SPAC22H10.10.1_Exon5	890	0.329058	0.255814	0.32491	0.351685	GTAAGT	6	9.48	AAG	43	3.03	0.767442	0	0	1.58484	0.501805	1.213	0.682022	1.30562	0.742697	NA	NA	NA	-0.598344	0.00155	4.08943	6.19131	-1.60481	5e-05	18.8312
SPAC23A1.19c.1	SPAC23A1.19c.1_Intron1	I	4113933	4114108	-	175	3153	261	3073	119	3589	3414	3192	1	1	1	SPAC23A1.19c.1_Exon2	3154	SPAC23A1.19c.1_Exon1	262	0.35776	0.308571	0.36525	0.301527	GTAAGT	6	9.48	CAG	175	4.79	0.811429	0.337143	0	2.974	1.51839	1.83354	1.10687	0.568702	0.751908	2.445	1.89	17.265	0.0132105	0.9689	8.13267	8.05854	-1.78903	5e-05	27.8489
SPAC23C11.04c.1	SPAC23C11.04c.1_Intron1	I	2138210	2138266	-	56	1257	2177	1172	147	3490	3342	1227	3	3	1	SPAC23C11.04c.1_Exon2	144	SPAC23C11.04c.1_Exon1	2178	0.369914	0.357143	0.409722	0.374197	GTAAGT	6	9.48	TAG	56	5.14	0.5	0.0892857	0	1.15972	1.47222	2.6875	0.64876	0.500918	0.106061	NA	NA	NA	-0.844718	0.5019	15.6422	28.0921	0.933849	0.2631	14.7051
SPAC23C11.04c.1	SPAC23C11.04c.1_Intron2	I	2138409	2138448	-	39	1075	2376	990	346	3490	3342	1227	3	2	2	SPAC23C11.04c.1_Exon3	397	SPAC23C11.04c.1_Exon2	144	0.369914	0.410256	0.367758	0.409722	GTATGT	6	8.68	CAG	39	4.79	0.487179	0.282051	0	1.01511	0.84131	0.891688	1.15972	1.47222	2.6875	NA	NA	NA	-0.844718	0.5019	15.6422	28.0921	0.933849	0.2631	14.7051
SPAC23C11.04c.1	SPAC23C11.04c.1_Intron3	I	2138844	2138897	-	53	626	2811	541	781	3490	3342	1227	3	1	3	SPAC23C11.04c.1_Exon4	627	SPAC23C11.04c.1_Exon3	397	0.369914	0.358491	0.349282	0.367758	GTGAGT	6	5.61	TAG	53	5.14	0.226415	0	0	0.861244	0.446571	1.76555	1.01511	0.84131	0.891688	NA	NA	NA	-0.844718	0.5019	15.6422	28.0921	0.933849	0.2631	14.7051
SPAC23C11.10.1	SPAC23C11.10.1_Intron2	I	2150882	2150929	+	47	259	672	259	672	978	798	798	4	2	3	SPAC23C11.10.1_Exon2	100	SPAC23C11.10.1_Exon3	200	0.321063	0.170213	0.38	0.335	GTAATA	6	2.48	TAG	47	5.14	NA	NA	NA	3.13	0.15	0.37	2.545	0.45	0.05	NA	NA	NA	0.0444079	0.90155	2.43148	2.35777	-3.2113	5e-05	21.8373
SPAC23C11.10.1	SPAC23C11.10.1_Intron3	I	2151128	2151179	+	51	505	422	505	422	978	798	798	4	3	2	SPAC23C11.10.1_Exon3	200	SPAC23C11.10.1_Exon4	164	0.321063	0.313725	0.335	0.323171	GTATAC	6	2.65	AAG	51	3.03	2.62745	0.0980392	0.254902	2.545	0.45	0.05	2.21341	0.341463	0.152439	NA	NA	NA	0.0444079	0.90155	2.43148	2.35777	-3.2113	5e-05	21.8373
SPAC23C11.10.1	SPAC23C11.10.1_Intron1	I	2150744	2150783	+	39	121	818	121	818	978	798	798	4	1	4	SPAC23C11.10.1_Exon1	122	SPAC23C11.10.1_Exon2	100	0.321063	0.25641	0.393443	0.38	GTAAGA	6	7.8	TAG	39	5.14	NA	NA	NA	2.88525	0.360656	0.508197	3.13	0.15	0.37	NA	NA	NA	0.0444079	0.90155	2.43148	2.35777	-3.2113	5e-05	21.8373
SPAC23C11.10.1	SPAC23C11.10.1_Intron4	I	2151342	2151385	+	43	719	216	719	216	978	798	798	4	4	1	SPAC23C11.10.1_Exon4	164	SPAC23C11.10.1_Exon5	217	0.321063	0.372093	0.323171	0.285714	GTAAGT	6	9.48	CAG	43	4.79	NA	NA	NA	2.21341	0.341463	0.152439	2.07373	0.414747	0.211982	NA	NA	NA	0.0444079	0.90155	2.43148	2.35777	-3.2113	5e-05	21.8373
SPAC23C11.11.1	SPAC23C11.11.1_Intron2	I	2152540	2152698	+	158	499	1525	387	826	2182	1810	999	4	2	3	SPAC23C11.11.1_Exon2	282	SPAC23C11.11.1_Exon3	314	0.35472	0.291139	0.400709	0.363057	GTAAGA	6	7.8	TAG	158	5.14	0.987342	0	0	11.3546	20.3227	42.617	6.23885	7.84076	66.4299	NA	NA	NA	-0.0287846	0.8261	85.1559	86.872	0.582159	5e-05	58.0273
SPAC23C11.11.1	SPAC23C11.11.1_Intron3	I	2153011	2153072	+	61	970	1151	858	452	2182	1810	999	4	3	2	SPAC23C11.11.1_Exon3	314	SPAC23C11.11.1_Exon4	303	0.35472	0.278689	0.363057	0.386139	GTAAGT	6	9.48	TAG	61	5.14	0.868852	0.0983607	0.262295	6.23885	7.84076	66.4299	7.0198	19.9175	57.7492	NA	NA	NA	-0.0287846	0.8261	85.1559	86.872	0.582159	5e-05	58.0273
SPAC23C11.11.1	SPAC23C11.11.1_Intron4	I	2153374	2153467	+	93	1333	756	1221	57	2182	1810	999	4	4	1	SPAC23C11.11.1_Exon4	303	SPAC23C11.11.1_Exon5	757	0.35472	0.301075	0.386139	0.350066	GTAAGT	6	9.48	TAG	93	5.14	1.36559	0.247312	0.290323	7.0198	19.9175	57.7492	4.71466	18.9379	4.42801	NA	NA	NA	-0.0287846	0.8261	85.1559	86.872	0.582159	5e-05	58.0273
SPAC23C11.11.1	SPAC23C11.11.1_Intron1	I	2152199	2152259	+	60	158	1964	46	1265	2182	1810	999	4	1	4	SPAC23C11.11.1_Exon1	159	SPAC23C11.11.1_Exon2	282	0.35472	0.233333	0.408805	0.400709	GTACGT	6	8.33	TAG	60	5.14	2.38333	0.0333333	0	3.56604	2.89308	8.10692	11.3546	20.3227	42.617	NA	NA	NA	-0.0287846	0.8261	85.1559	86.872	0.582159	5e-05	58.0273
SPAC23C11.17.1	SPAC23C11.17.1_Intron1	I	2167245	2167301	+	56	76	1686	76	1382	1818	1762	1458	1	1	1	SPAC23C11.17.1_Exon1	77	SPAC23C11.17.1_Exon2	1687	0.382838	0.285714	0.428571	0.384114	GTAAGG	6	7.57	TAG	56	5.14	1.41071	0	0	0.545455	0.532468	12.8052	2.77593	8.81921	20.4469	0.705	1.545	0.09	0.160868	0.1978	49.5927	44.36	0.623467	5e-05	28.7945
SPAC23C4.02.1	SPAC23C4.02.1_Intron2	I	1032310	1032358	+	48	226	1809	129	1809	2083	1903	1806	4	2	3	SPAC23C4.02.1_Exon2	54	SPAC23C4.02.1_Exon3	229	0.405665	0.291667	0.37037	0.441048	GTTGGT	6	1.69	TAG	48	5.14	1.1875	0	0	5.09259	0.944444	18.8889	8.25328	1.16594	43.2882	7.195	4.82	0.26	0.35206	0.16855	11.6623	9.137	-2.65338	5e-05	57.4845
SPAC23C4.02.1	SPAC23C4.02.1_Intron3	I	1032586	1032627	+	41	502	1540	405	1540	2083	1903	1806	4	3	2	SPAC23C4.02.1_Exon3	229	SPAC23C4.02.1_Exon4	90	0.405665	0.268293	0.441048	0.377778	GTATCC	6	1.32	TAG	41	5.14	0.658537	0	0	8.25328	1.16594	43.2882	6.74444	1.18889	41.2333	7.195	4.82	0.26	0.35206	0.16855	11.6623	9.137	-2.65338	5e-05	57.4845
SPAC23C4.02.1	SPAC23C4.02.1_Intron4	I	1032716	1032765	+	49	632	1402	535	1402	2083	1903	1806	4	4	1	SPAC23C4.02.1_Exon4	90	SPAC23C4.02.1_Exon5	1403	0.405665	0.326531	0.377778	0.424091	GTATGT	6	8.68	TAG	49	5.14	0.857143	0	0.326531	6.74444	1.18889	41.2333	6.77904	2.45759	23.9957	7.195	4.82	0.26	0.35206	0.16855	11.6623	9.137	-2.65338	5e-05	57.4845
SPAC23C4.02.1	SPAC23C4.02.1_Intron1	I	1032215	1032257	+	42	131	1910	34	1910	2083	1903	1806	4	1	4	SPAC23C4.02.1_Exon1	132	SPAC23C4.02.1_Exon2	54	0.405665	0.309524	0.348485	0.37037	GTACGC	6	7.24	TAG	42	5.14	1.19048	0	0.333333	2.4697	0.666667	3.46212	5.09259	0.944444	18.8889	7.195	4.82	0.26	0.35206	0.16855	11.6623	9.137	-2.65338	5e-05	57.4845
SPAC23C4.04c.1	SPAC23C4.04c.1_Intron1	I	1036343	1036396	+	53	311	112	311	112	476	423	423	1	1	1	SPAC23C4.04c.1_Exon1	312	SPAC23C4.04c.1_Exon2	113	0.355042	0.283019	0.352564	0.39823	GTAAAT	6	4.54	TAG	53	5.14	1	0.301887	0	1.13462	1.21795	0.814103	1.30973	17.7168	3.93805	NA	NA	NA	-0.583212	0.00165	26.735	40.0539	0.900849	5e-05	21.4517
SPAC23C4.14.1	SPAC23C4.14.1_Intron1	I	1053167	1053243	+	76	293	1225	184	1225	1594	1384	1275	3	1	3	SPAC23C4.14.1_Exon1	294	SPAC23C4.14.1_Exon2	434	0.358846	0.276316	0.333333	0.37788	GTAAGT	6	9.48	TAG	76	5.14	1.11842	0	0	1.76531	0.952381	6.97959	2.38479	1.99078	7.22581	0.96	0.92	0.555	-0.180858	0.2528	10.3278	11.7072	-0.642416	5e-05	18.2742
SPAC23C4.14.1	SPAC23C4.14.1_Intron3	I	1054254	1054345	+	91	1380	123	1271	123	1594	1384	1275	3	3	1	SPAC23C4.14.1_Exon3	536	SPAC23C4.14.1_Exon4	124	0.358846	0.263736	0.399254	0.346774	GTATGA	6	7	TAG	91	5.14	0.362637	0	0	1.47948	2.69963	7.21455	0.774194	2.04032	6.66935	0.96	0.92	0.555	-0.180858	0.2528	10.3278	11.7072	-0.642416	5e-05	18.2742
SPAC23C4.14.1	SPAC23C4.14.1_Intron2	I	1053676	1053719	+	43	802	749	693	749	1594	1384	1275	3	2	2	SPAC23C4.14.1_Exon2	434	SPAC23C4.14.1_Exon3	536	0.358846	0.27907	0.37788	0.399254	GTAAGT	6	9.48	AAG	43	3.03	0.837209	0.0930233	0	2.38479	1.99078	7.22581	1.47948	2.69963	7.21455	0.96	0.92	0.555	-0.180858	0.2528	10.3278	11.7072	-0.642416	5e-05	18.2742
SPAC23C4.15.1	SPAC23C4.15.1_Intron2	I	1054956	1055167	+	211	292	739	222	475	1242	967	633	2	2	1	SPAC23C4.15.1_Exon2	84	SPAC23C4.15.1_Exon3	740	0.323671	0.298578	0.440476	0.331081	GTATGT	6	8.68	TAG	211	5.14	0.815166	0.0805687	0.0900474	3.19048	6.36905	129.94	4.01622	19.2257	41.4486	NA	NA	NA	-0.442156	0.00415	74.4519	101.153	1.08345	5e-05	47.7339
SPAC23C4.15.1	SPAC23C4.15.1_Intron1	I	1054809	1054873	+	64	145	1033	75	769	1242	967	633	2	1	2	SPAC23C4.15.1_Exon1	146	SPAC23C4.15.1_Exon2	84	0.323671	0.1875	0.321918	0.440476	GTATGT	6	8.68	TAG	64	5.14	1.375	0.09375	0.171875	5.17808	11.8973	43.1507	3.19048	6.36905	129.94	NA	NA	NA	-0.442156	0.00415	74.4519	101.153	1.08345	5e-05	47.7339
SPAC23D3.02.1	SPAC23D3.02.1_Intron1	I	4338815	4338867	+	52	143	1077	74	949	1272	1220	1023	1	1	1	SPAC23D3.02.1_Exon1	144	SPAC23D3.02.1_Exon2	1078	0.371855	0.25	0.347222	0.382189	GTATGT	6	8.68	TAG	52	5.14	0.653846	0.134615	0.307692	0.805556	0.777778	3.8125	1.99722	6.43414	17.7866	NA	NA	NA	-0.125643	0.34565	30.6612	33.4512	0.513897	0.0002	23.4268
SPAC23D3.14c.1	SPAC23D3.14c.1_Intron1	I	4373326	4373370	-	44	1617	288	1617	288	1949	1746	1746	3	3	1	SPAC23D3.14c.1_Exon2	889	SPAC23D3.14c.1_Exon1	289	0.370959	0.272727	0.380202	0.359862	GTAAGT	6	9.48	AAG	44	3.03	NA	NA	NA	1.05062	0.766029	0.228346	1.32872	1.3391	0.0934256	0.705	0.49	0.29	-0.303809	0.4203	2.44403	3.01691	-1.36858	0.0154	7.79017
SPAC23D3.14c.1	SPAC23D3.14c.1_Intron2	I	4374258	4374376	-	118	611	1220	611	1220	1949	1746	1746	3	2	2	SPAC23D3.14c.1_Exon3	316	SPAC23D3.14c.1_Exon2	889	0.370959	0.338983	0.379747	0.380202	GTATGC	6	7.58	TAG	118	5.14	NA	NA	NA	NA	NA	NA	1.05062	0.766029	0.228346	0.705	0.49	0.29	-0.303809	0.4203	2.44403	3.01691	-1.36858	0.0154	7.79017
SPAC23D3.14c.1	SPAC23D3.14c.1_Intron3	I	4374691	4374732	-	41	255	1653	255	1653	1949	1746	1746	3	1	3	SPAC23D3.14c.1_Exon4	256	SPAC23D3.14c.1_Exon3	316	0.370959	0.243902	0.398438	0.379747	GTATGT	6	8.68	TAG	41	5.14	NA	NA	NA	NA	NA	NA	NA	NA	NA	0.705	0.49	0.29	-0.303809	0.4203	2.44403	3.01691	-1.36858	0.0154	7.79017
SPAC23E2.02.1	SPAC23E2.02.1_Intron2	I	449241	449294	+	53	2751	1432	2751	1236	4236	4018	3822	2	2	1	SPAC23E2.02.1_Exon2	2564	SPAC23E2.02.1_Exon3	1433	0.370397	0.188679	0.382605	0.36776	GTAGGT	6	6.49	CAG	53	4.79	0.584906	0.0943396	0	1.60452	0.600234	5.26677	0.972784	2.20656	1.90509	NA	NA	NA	0.354903	0.01025	7.90962	6.18471	-1.12367	5e-05	13.4765
SPAC23E2.02.1	SPAC23E2.02.1_Intron1	I	446513	446678	+	165	23	4048	23	3852	4236	4018	3822	2	1	2	SPAC23E2.02.1_Exon1	24	SPAC23E2.02.1_Exon2	2564	0.370397	0.242424	0.583333	0.382605	GTATTC	6	2.26	AAG	165	3.03	NA	NA	NA	NA	NA	NA	1.60452	0.600234	5.26677	NA	NA	NA	0.354903	0.01025	7.90962	6.18471	-1.12367	5e-05	13.4765
SPAC23H4.14.1	SPAC23H4.14.1_Intron1	I	1582597	1582656	-	59	2981	186	2787	73	3226	3025	2718	4	4	1	SPAC23H4.14.1_Exon2	2390	SPAC23H4.14.1_Exon1	187	0.32765	0.135593	0.341004	0.304813	GTAAGT	6	9.48	AAG	59	3.03	1.20339	0.0508475	0	4.24937	0.920502	2.39289	1.50267	1.64706	2	2.82	0.4	0.295	0.0305399	0.84685	4.76247	4.66271	-3.08373	5e-05	39.5308
SPAC23H4.14.1	SPAC23H4.14.1_Intron3	I	1585196	1585247	-	51	390	2785	196	2672	3226	3025	2718	4	2	3	SPAC23H4.14.1_Exon4	79	SPAC23H4.14.1_Exon3	106	0.32765	0.137255	0.367089	0.367925	GTATGG	6	6.77	TAG	51	5.14	0.784314	0	0	4.77215	0.164557	4.70886	3.63208	0.0471698	4.37736	2.82	0.4	0.295	0.0305399	0.84685	4.76247	4.66271	-3.08373	5e-05	39.5308
SPAC23H4.14.1	SPAC23H4.14.1_Intron2	I	1585045	1585091	-	46	546	2634	352	2521	3226	3025	2718	4	3	2	SPAC23H4.14.1_Exon3	106	SPAC23H4.14.1_Exon2	2390	0.32765	0.173913	0.367925	0.341004	GTAAAC	6	3.45	TAG	46	5.14	0.652174	0	0	3.63208	0.0471698	4.37736	4.24937	0.920502	2.39289	2.82	0.4	0.295	0.0305399	0.84685	4.76247	4.66271	-3.08373	5e-05	39.5308
SPAC23H4.14.1	SPAC23H4.14.1_Intron4	I	1585325	1585370	-	45	267	2914	73	2801	3226	3025	2718	4	1	4	SPAC23H4.14.1_Exon5	268	SPAC23H4.14.1_Exon4	79	0.32765	0.266667	0.320896	0.367089	GTATGA	6	7	TAG	45	5.14	1.17778	0	0	2.86194	0.134328	2.05224	4.77215	0.164557	4.70886	2.82	0.4	0.295	0.0305399	0.84685	4.76247	4.66271	-3.08373	5e-05	39.5308
SPAC23H4.16c.1	SPAC23H4.16c.1_Intron1	I	1578445	1578491	+	46	132	1119	132	1049	1297	1057	987	3	1	3	SPAC23H4.16c.1_Exon1	133	SPAC23H4.16c.1_Exon2	166	0.342328	0.304348	0.390977	0.325301	GTACTA	6	1.34	TAG	46	5.14	2.63043	0.913043	8.84783	3.35338	1.30075	3.33083	3.56024	3.48795	1.5	0.415	0.46	0.08	-0.148053	0.305	21.5676	23.8985	0.224376	0.1278	20.4562
SPAC23H4.16c.1	SPAC23H4.16c.1_Intron3	I	1578984	1579042	+	58	671	568	671	498	1297	1057	987	3	3	1	SPAC23H4.16c.1_Exon3	193	SPAC23H4.16c.1_Exon4	569	0.342328	0.310345	0.430052	0.328647	GTAAGA	6	7.8	TAG	58	5.14	1.06897	0.431034	0	1.57513	4.27461	1.46632	1.83304	5.65026	0.817223	0.415	0.46	0.08	-0.148053	0.305	21.5676	23.8985	0.224376	0.1278	20.4562
SPAC23H4.16c.1	SPAC23H4.16c.1_Intron2	I	1578656	1578792	+	136	343	818	343	748	1297	1057	987	3	2	2	SPAC23H4.16c.1_Exon2	166	SPAC23H4.16c.1_Exon3	193	0.342328	0.286765	0.325301	0.430052	GTATGT	6	8.68	TAG	136	5.14	0.772059	0.0441176	0.0588235	3.56024	3.48795	1.5	1.57513	4.27461	1.46632	0.415	0.46	0.08	-0.148053	0.305	21.5676	23.8985	0.224376	0.1278	20.4562
SPAC23H4.17c.1	SPAC23H4.17c.1_Intron1	I	1577836	1577901	+	65	1125	127	983	127	1317	1252	1110	1	1	1	SPAC23H4.17c.1_Exon1	1126	SPAC23H4.17c.1_Exon2	128	0.368261	0.307692	0.373002	0.359375	GTACGT	6	8.33	TAG	65	5.14	1.67692	0	0.307692	3.32948	0.606572	1.48401	3.14844	0.632812	1.44531	3.135	0.97	0.125	0.106117	0.6337	3.6019	3.34648	-3.39073	5e-05	35.0995
SPAC23H4.21.1	SPAC23H4.21.1_Intron1	I	1586096	1586188	-	92	346	355	285	84	793	701	369	1	1	1	SPAC23H4.21.1_Exon2	347	SPAC23H4.21.1_Exon1	356	0.325347	0.26087	0.357349	0.311798	GTAAGT	6	9.48	CAG	92	4.79	0.293478	0.23913	0.184783	0.386167	3.70317	3.38905	0.567416	3.5618	2.77809	NA	NA	NA	-0.916831	0.1573	5.76111	10.8768	1.67451	0.0146	3.40738
SPAC24B11.14.1	SPAC24B11.14.1_Intron1	I	230681	230742	+	61	137	394	137	394	592	501	501	2	1	2	SPAC24B11.14.1_Exon1	138	SPAC24B11.14.1_Exon2	58	0.341216	0.229508	0.369565	0.396552	GTATTT	6	3.36	CAG	61	4.79	NA	NA	NA	0.797101	1.52174	0.826087	0.948276	1.39655	1.17241	1.455	0.67	0.955	-0.355853	0.71525	4.61078	5.90061	-0.742597	0.4967	9.8728
SPAC24B11.14.1	SPAC24B11.14.1_Intron2	I	230799	230829	+	30	255	307	255	307	592	501	501	2	2	1	SPAC24B11.14.1_Exon2	58	SPAC24B11.14.1_Exon3	308	0.341216	0.266667	0.396552	0.353896	GTAGTT	6	1.17	TAG	30	5.14	0.333333	0.133333	0.3	0.948276	1.39655	1.17241	0.711039	0.288961	0.162338	1.455	0.67	0.955	-0.355853	0.71525	4.61078	5.90061	-0.742597	0.4967	9.8728
SPAC24C9.13c.1	SPAC24C9.13c.1_Intron1	I	3071750	3071803	-	53	321	167	201	66	541	488	267	1	1	1	SPAC24C9.13c.1_Exon2	322	SPAC24C9.13c.1_Exon1	168	0.35305	0.264151	0.388199	0.321429	GTATGT	6	8.68	TAG	53	5.14	0.773585	0	0	2.62733	4.42857	9.03416	1.92857	2.14286	2.79762	NA	NA	NA	0.172692	0.3569	28.2935	25.1016	-0.377311	0.04195	32.6049
SPAC24C9.15c.1	SPAC24C9.15c.1_Intron2	I	3075353	3075428	-	75	560	1087	560	887	1722	1595	1395	2	1	2	SPAC24C9.15c.1_Exon3	561	SPAC24C9.15c.1_Exon2	583	0.372822	0.266667	0.395722	0.399657	GTAAGC	6	8.38	TAG	75	5.14	NA	NA	NA	NA	NA	NA	0.259005	0.344768	0.197256	NA	NA	NA	0.213728	0.61585	5.53803	4.77548	-1.73212	0.0017	15.8649
SPAC24C9.15c.1	SPAC24C9.15c.1_Intron1	I	3074719	3074771	-	52	1217	453	1217	253	1722	1595	1395	2	2	1	SPAC24C9.15c.1_Exon2	583	SPAC24C9.15c.1_Exon1	454	0.372822	0.307692	0.399657	0.339207	GTACGT	6	8.33	TAG	52	5.14	NA	NA	NA	0.259005	0.344768	0.197256	0.134361	0.777533	0.0220264	NA	NA	NA	0.213728	0.61585	5.53803	4.77548	-1.73212	0.0017	15.8649
SPAC25H1.03.1	SPAC25H1.03.1_Intron1	I	2528101	2528153	+	52	72	491	64	491	615	563	555	1	1	1	SPAC25H1.03.1_Exon1	73	SPAC25H1.03.1_Exon2	492	0.39187	0.288462	0.356164	0.408537	GTAAGT	6	9.48	TAG	52	5.14	NA	NA	NA	1.10959	0.452055	4.19178	1.3252	0.865854	5.94106	0.925	0.59	0.255	0.960492	0.03065	17.1817	8.82935	-1.31728	0.0038	22.0024
SPAC26F1.02.1	SPAC26F1.02.1_Intron1	I	5182122	5182190	-	68	541	880	541	141	1489	1333	594	2	2	1	SPAC26F1.02.1_Exon2	443	SPAC26F1.02.1_Exon1	881	0.347884	0.279412	0.424379	0.312145	GTAAGC	6	8.38	TAG	68	5.14	0.0147059	0	0	0.498871	1.57111	2.1535	0.329171	1.23723	1.97049	4.23	15.355	17.05	0.19844	0.81985	9.87303	8.60427	0.935629	0.46445	4.49844
SPAC26F1.02.1	SPAC26F1.02.1_Intron2	I	5182632	5182720	-	88	11	1390	11	651	1489	1333	594	2	1	2	SPAC26F1.02.1_Exon3	12	SPAC26F1.02.1_Exon2	443	0.347884	0.409091	0.166667	0.424379	GTAAGC	6	8.38	TAG	88	5.14	NA	NA	NA	NA	NA	NA	0.498871	1.57111	2.1535	4.23	15.355	17.05	0.19844	0.81985	9.87303	8.60427	0.935629	0.46445	4.49844
SPAC27E2.12.1	SPAC27E2.12.1_Intron1	I	4010930	4011104	+	174	18	213	18	213	405	231	231	1	1	1	SPAC27E2.12.1_Exon1	19	SPAC27E2.12.1_Exon2	214	0.34321	0.304598	0.421053	0.369159	GTAAGT	6	9.48	TAG	174	5.14	NA	NA	NA	NA	NA	NA	NA	NA	NA	NA	NA	NA	-0.683017	0.4646	4.62826	7.43064	1.41657	0.2267	2.78353
SPAC29A4.02c.1	SPAC29A4.02c.1_Intron1	I	5144034	5144327	+	293	290	1188	217	1013	1771	1478	1230	1	1	1	SPAC29A4.02c.1_Exon1	291	SPAC29A4.02c.1_Exon2	1189	0.418972	0.300341	0.460481	0.438183	GTAAGT	6	9.48	TAG	293	5.14	7.67235	0.737201	1.67577	32.6392	119.271	395.904	47.7082	372.918	766.664	NA	NA	NA	-0.440735	0.1265	1457.74	1978.59	2.2273	5e-05	422.543
SPAC29A4.09.1	SPAC29A4.09.1_Intron2	I	5132794	5132834	-	40	276	925	104	555	1241	1154	612	2	1	2	SPAC29A4.09.1_Exon3	277	SPAC29A4.09.1_Exon2	107	0.359388	0.35	0.397112	0.401869	GTATGG	6	6.77	CAG	40	4.79	1.35	0.2	0.1	1.66426	3.80505	3.24188	3.21495	11.243	2.90654	2.55	0.5	0.965	-0.711043	0.0006	23.9929	39.276	0.928174	0.0005	20.6405
SPAC29A4.09.1	SPAC29A4.09.1_Intron1	I	5132641	5132688	-	47	422	772	250	402	1241	1154	612	2	2	1	SPAC29A4.09.1_Exon2	107	SPAC29A4.09.1_Exon1	773	0.359388	0.276596	0.401869	0.346701	GTAAGT	6	9.48	CAG	47	4.79	2.06383	0.0851064	0	3.21495	11.243	2.90654	1.99483	6.35576	4.11643	2.55	0.5	0.965	-0.711043	0.0006	23.9929	39.276	0.928174	0.0005	20.6405
SPAC29A4.20.1	SPAC29A4.20.1_Intron1	I	5104605	5104700	-	95	1672	354	1553	82	2121	2026	1635	1	1	1	SPAC29A4.20.1_Exon2	1673	SPAC29A4.20.1_Exon1	355	0.387082	0.263158	0.415421	0.290141	GTAAGT	6	9.48	TAG	95	5.14	0.378947	0	0	3.44531	6.8685	14.4136	1.09577	2.50423	2.16338	1.99	0.055	0.81	-0.848838	5e-05	16.0056	28.8269	0.054694	0.78585	27.7545
SPAC2C4.09.1	SPAC2C4.09.1_Intron1	I	4276244	4276293	+	49	236	1199	221	493	1484	1372	651	2	1	2	SPAC2C4.09.1_Exon1	237	SPAC2C4.09.1_Exon2	388	0.349057	0.408163	0.371308	0.39433	GTATGT	6	8.68	TAG	49	5.14	0.653061	0.510204	0.285714	0.78903	0.953586	3.95359	1.24742	3.60052	2.68814	0.145	0.1	0.075	0.1471	0.52635	9.97125	9.00468	0.355154	0.14075	7.03973
SPAC2C4.09.1	SPAC2C4.09.1_Intron2	I	4276680	4276743	+	63	672	749	657	43	1484	1372	651	2	2	1	SPAC2C4.09.1_Exon2	388	SPAC2C4.09.1_Exon3	750	0.349057	0.253968	0.39433	0.324	GTATGT	6	8.68	AAG	63	3.03	0.507937	0.174603	0	1.24742	3.60052	2.68814	0.397333	0.405333	0.477333	0.145	0.1	0.075	0.1471	0.52635	9.97125	9.00468	0.355154	0.14075	7.03973
SPAC2E12.02.1	SPAC2E12.02.1_Intron1	I	5059802	5060144	+	342	530	1912	328	1502	2784	2442	1830	1	1	1	SPAC2E12.02.1_Exon1	531	SPAC2E12.02.1_Exon2	1913	0.378233	0.307018	0.387947	0.388395	GTAAGT	6	9.48	CAG	342	4.79	4.46491	0.0409357	0	8.44633	2.6629	13.0923	5.35494	4.79038	12.3183	NA	NA	NA	0.220817	0.1647	21.3844	18.3495	-1.4758	5e-05	51.0372
SPAC2F3.04c.1	SPAC2F3.04c.1_Intron1	I	3927884	3927968	-	84	611	434	349	104	1129	1045	453	1	1	1	SPAC2F3.04c.1_Exon2	612	SPAC2F3.04c.1_Exon1	435	0.35961	0.345238	0.388889	0.321839	GTACGC	6	7.24	TAG	84	5.14	1.60714	0.154762	0.761905	2.36111	10.433	20.5915	2.10345	11.7517	7.52184	1.625	0.05	2.365	0.0380316	0.77085	68.5299	66.7469	1.62018	5e-05	21.7125
SPAC2F3.11.1	SPAC2F3.11.1_Intron1	I	3946695	3946737	+	42	150	1250	118	1037	1442	1400	1155	1	1	1	SPAC2F3.11.1_Exon1	151	SPAC2F3.11.1_Exon2	1251	0.355062	0.333333	0.397351	0.351719	GTACAT	6	3.4	TAG	42	5.14	3.21429	1.04762	7.54762	4.17219	5.23841	10	3.98401	8.26938	11.1886	NA	NA	NA	0.297993	0.0766	55.2787	44.9627	0.05731	0.75945	43.2116
SPAC2F3.12c.1	SPAC2F3.12c.1_Intron1	I	3948241	3948282	-	41	737	330	664	312	1108	931	840	4	4	1	SPAC2F3.12c.1_Exon2	77	SPAC2F3.12c.1_Exon1	331	0.361913	0.414634	0.298701	0.359517	GTACGA	6	6.65	CAG	41	4.79	NA	NA	NA	3.19481	11.4675	7.83117	1.67069	6.10876	5.12991	0.49	0.045	0.135	-0.510179	0.2912	16.2765	23.1814	5.91306	0.20755	0.384709
SPAC2F3.12c.1	SPAC2F3.12c.1_Intron3	I	3948493	3948537	-	44	482	582	409	564	1108	931	840	4	2	3	SPAC2F3.12c.1_Exon4	154	SPAC2F3.12c.1_Exon3	88	0.361913	0.25	0.402597	0.409091	GTAAGA	6	7.8	CAG	44	4.79	1.06818	0.0909091	0	2.75325	5.21429	10.9416	2.90909	10.4545	2.94318	0.49	0.045	0.135	-0.510179	0.2912	16.2765	23.1814	5.91306	0.20755	0.384709
SPAC2F3.12c.1	SPAC2F3.12c.1_Intron2	I	3948358	3948406	-	48	613	447	540	429	1108	931	840	4	3	2	SPAC2F3.12c.1_Exon3	88	SPAC2F3.12c.1_Exon2	77	0.361913	0.208333	0.409091	0.298701	GTATGT	6	8.68	TAG	48	5.14	0.395833	0	0	2.90909	10.4545	2.94318	3.19481	11.4675	7.83117	0.49	0.045	0.135	-0.510179	0.2912	16.2765	23.1814	5.91306	0.20755	0.384709
SPAC2F3.12c.1	SPAC2F3.12c.1_Intron4	I	3948690	3948734	-	44	285	779	212	761	1108	931	840	4	1	4	SPAC2F3.12c.1_Exon5	286	SPAC2F3.12c.1_Exon4	154	0.361913	0.340909	0.391608	0.402597	GTAGGT	6	6.49	TAG	44	5.14	1.79545	0.545455	1.36364	2.81818	5.52448	9.26923	2.75325	5.21429	10.9416	0.49	0.045	0.135	-0.510179	0.2912	16.2765	23.1814	5.91306	0.20755	0.384709
SPAC2F3.13c.1	SPAC2F3.13c.1_Intron1	I	3947929	3949056	-	1127	1168	45	1122	0	2340	1138	2174	2	2	1	SPAC2F3.13c.1_Exon2	866	SPAC2F3.13c.1_Exon1	46	0.375214	0.36291	0.399538	0.304348	CGATTT	6	-17.25	TAA	1127	-6.17	2.25998	5.66105	6.8953	4.11201	4.05081	11.7044	0.391304	0.347826	0.413043	0.5	0.02	0.04	-0.282444	0.3018	16.288	19.8103	-0.826146	0.00055	35.1226
SPAC2F3.13c.1	SPAC2F3.13c.1_Intron2	I	3949921	3949996	-	75	228	2037	182	1992	2340	1138	2174	2	1	2	SPAC2F3.13c.1_Exon3	229	SPAC2F3.13c.1_Exon2	866	0.375214	0.226667	0.406114	0.399538	GTAAGG	6	7.57	TAG	75	5.14	1.2	0.0133333	0	2.40611	1.82096	10.5502	4.11201	4.05081	11.7044	0.5	0.02	0.04	-0.282444	0.3018	16.288	19.8103	-0.826146	0.00055	35.1226
SPAC2G11.07c.1	SPAC2G11.07c.1_Intron1	I	821005	821044	-	39	876	1238	660	843	2153	1856	1245	2	2	1	SPAC2G11.07c.1_Exon2	75	SPAC2G11.07c.1_Exon1	1239	0.387366	0.333333	0.4	0.397902	GTAAGT	6	9.48	TAG	39	5.14	4.35897	0.0512821	0	15.0533	39.4267	68.3333	10.9023	39.8087	38.8224	3.855	2.12	0.15	-0.024869	0.8727	176.268	179.333	0.867322	5e-05	98.3039
SPAC2G11.07c.1	SPAC2G11.07c.1_Intron2	I	821118	821376	-	258	544	1351	328	956	2153	1856	1245	2	1	2	SPAC2G11.07c.1_Exon3	545	SPAC2G11.07c.1_Exon2	75	0.387366	0.251938	0.431193	0.4	GTAAGT	6	9.48	CAG	258	4.79	2.41473	0.131783	0.0658915	7.82752	16.6899	45.4514	15.0533	39.4267	68.3333	3.855	2.12	0.15	-0.024869	0.8727	176.268	179.333	0.867322	5e-05	98.3039
SPAC2G11.10c.1	SPAC2G11.10c.1_Intron1	I	827420	827464	-	44	659	1108	547	883	1811	1543	1206	2	2	1	SPAC2G11.10c.1_Exon2	215	SPAC2G11.10c.1_Exon1	1109	0.349531	0.272727	0.395349	0.35798	GTATGT	6	8.68	TAG	44	5.14	0.272727	0	0	1.0186	1.69767	6.95349	0.551849	3.11903	5.27592	NA	NA	NA	-1.19768	0.07025	1.27309	2.92011	1.15624	0.34355	1.3102
SPAC2G11.10c.1	SPAC2G11.10c.1_Intron2	I	827678	827902	-	224	221	1366	109	1141	1811	1543	1206	2	1	2	SPAC2G11.10c.1_Exon3	222	SPAC2G11.10c.1_Exon2	215	0.349531	0.25	0.387387	0.395349	GTATGT	6	8.68	TAG	224	5.14	0.446429	0.107143	0	1.2027	0.743243	4.35586	1.0186	1.69767	6.95349	NA	NA	NA	-1.19768	0.07025	1.27309	2.92011	1.15624	0.34355	1.3102
SPAC30.02c.1	SPAC30.02c.1_Intron1	I	4393572	4393717	-	145	246	760	172	674	1151	1006	846	1	1	1	SPAC30.02c.1_Exon2	247	SPAC30.02c.1_Exon1	761	0.342311	0.317241	0.303644	0.360053	GTATGT	6	8.68	TAG	145	5.14	0.903448	0.0482759	0	1.91093	4.65182	6.37652	1.45992	6.09461	11.5834	NA	NA	NA	-0.563319	0.0001	25.5025	37.6841	0.984535	5e-05	19.0451
SPAC30.03c.1	SPAC30.03c.1_Intron2	I	4394967	4395009	-	42	630	592	583	261	1264	1041	663	5	4	2	SPAC30.03c.1_Exon3	84	SPAC30.03c.1_Exon2	170	0.325158	0.261905	0.416667	0.335294	GTATAT	6	3.74	TAG	42	5.14	1.45238	0.047619	0	3.09524	10.4048	28.9762	3.09412	11.5412	4.71765	1.61	1.815	0.58	-0.314847	0.02605	37.3636	46.4758	1.38058	5e-05	17.8497
SPAC30.03c.1	SPAC30.03c.1_Intron3	I	4395092	4395130	-	38	509	717	462	386	1264	1041	663	5	3	3	SPAC30.03c.1_Exon4	238	SPAC30.03c.1_Exon3	84	0.325158	0.289474	0.361345	0.416667	GTGCGT	6	4.46	CAG	38	4.79	1.71053	0.105263	0	2.7395	7.93697	12.9286	3.09524	10.4048	28.9762	1.61	1.815	0.58	-0.314847	0.02605	37.3636	46.4758	1.38058	5e-05	17.8497
SPAC30.03c.1	SPAC30.03c.1_Intron5	I	4395491	4395529	-	38	110	1116	63	785	1264	1041	663	5	1	5	SPAC30.03c.1_Exon6	111	SPAC30.03c.1_Exon5	77	0.325158	0.289474	0.297297	0.38961	GTACTA	6	1.34	CAG	38	4.79	NA	NA	NA	1.54955	2.37838	2.04505	1.97403	4.45455	15.8961	1.61	1.815	0.58	-0.314847	0.02605	37.3636	46.4758	1.38058	5e-05	17.8497
SPAC30.03c.1	SPAC30.03c.1_Intron1	I	4394741	4394798	-	57	841	366	794	35	1264	1041	663	5	5	1	SPAC30.03c.1_Exon2	170	SPAC30.03c.1_Exon1	367	0.325158	0.245614	0.335294	0.310627	GTATGA	6	7	CAG	57	4.79	0.649123	0	0	3.09412	11.5412	4.71765	1.77384	8.61853	0.702997	1.61	1.815	0.58	-0.314847	0.02605	37.3636	46.4758	1.38058	5e-05	17.8497
SPAC30.03c.1	SPAC30.03c.1_Intron4	I	4395367	4395415	-	48	224	992	177	661	1264	1041	663	5	2	4	SPAC30.03c.1_Exon5	77	SPAC30.03c.1_Exon4	238	0.325158	0.291667	0.38961	0.361345	GTAGAA	6	-0.12	AAG	48	3.03	NA	NA	NA	1.97403	4.45455	15.8961	2.7395	7.93697	12.9286	1.61	1.815	0.58	-0.314847	0.02605	37.3636	46.4758	1.38058	5e-05	17.8497
SPAC30D11.02c.1	SPAC30D11.02c.1_Intron1	I	1119620	1119748	+	128	695	15	243	15	838	710	258	1	1	1	SPAC30D11.02c.1_Exon1	696	SPAC30D11.02c.1_Exon2	16	0.378282	0.335938	0.389368	0.25	GTAAGT	6	9.48	TAG	128	5.14	NA	NA	NA	0.0876437	0.113506	0.0344828	NA	NA	NA	NA	NA	NA	0.960697	0.04575	1.79464	0.922103	-0.351266	0.4945	1.17631
SPAC30D11.03.1	SPAC30D11.03.1_Intron1	I	1116202	1116246	-	44	2166	304	2166	146	2514	2423	2265	2	2	1	SPAC30D11.03.1_Exon2	122	SPAC30D11.03.1_Exon1	305	0.388624	0.227273	0.377049	0.344262	GTATGT	6	8.68	TAG	44	5.14	NA	NA	NA	1.45082	11.041	4.41803	0.77377	14.4459	0.737705	NA	NA	NA	-1.40765	5e-05	12.4903	33.1373	-0.0821637	0.5112	35.0792
SPAC30D11.03.1	SPAC30D11.03.1_Intron2	I	1116367	1116414	-	47	1998	469	1998	311	2514	2423	2265	2	1	2	SPAC30D11.03.1_Exon3	1999	SPAC30D11.03.1_Exon2	122	0.388624	0.170213	0.405203	0.377049	GTATGT	6	8.68	TAG	47	5.14	0.382979	0	0	3.44122	4.47274	15.7899	1.45082	11.041	4.41803	NA	NA	NA	-1.40765	5e-05	12.4903	33.1373	-0.0821637	0.5112	35.0792
SPAC31G5.06.1	SPAC31G5.06.1_Intron1	I	2996403	2996453	+	50	100	605	100	605	755	705	705	1	1	1	SPAC31G5.06.1_Exon1	101	SPAC31G5.06.1_Exon2	606	0.333775	0.28	0.336634	0.338284	GTAATC	6	3.06	TAG	50	5.14	0.34	0	0.38	1.35644	0.0693069	1.57426	1.0264	0.207921	0.688119	NA	NA	NA	-0.0831519	0.89725	1.02833	1.08934	-3.27983	5e-05	10.5801
SPAC323.03c.1	SPAC323.03c.1_Intron2	I	3911964	3912016	-	52	632	1430	588	1225	2114	1977	1728	3	2	2	SPAC323.03c.1_Exon3	485	SPAC323.03c.1_Exon2	138	0.348155	0.288462	0.371134	0.376812	GTAAGT	6	9.48	CAG	52	4.79	NA	NA	NA	1.05773	0.606186	2.45361	1.18841	0.673913	1.11594	0.175	0.145	2.825	-0.0731107	0.6652	6.88716	7.24517	-0.320362	0.0516	9.04664
SPAC323.03c.1	SPAC323.03c.1_Intron3	I	3912500	3912542	-	42	106	1966	62	1761	2114	1977	1728	3	1	3	SPAC323.03c.1_Exon4	107	SPAC323.03c.1_Exon3	485	0.348155	0.357143	0.383178	0.371134	GTAAGT	6	9.48	AAG	42	3.03	0.190476	0	0	0.364486	0.00934579	0.130841	1.05773	0.606186	2.45361	0.175	0.145	2.825	-0.0731107	0.6652	6.88716	7.24517	-0.320362	0.0516	9.04664
SPAC323.03c.1	SPAC323.03c.1_Intron1	I	3911784	3911827	-	43	821	1250	777	1045	2114	1977	1728	3	3	1	SPAC323.03c.1_Exon2	138	SPAC323.03c.1_Exon1	1251	0.348155	0.395349	0.376812	0.334932	GTTAGT	6	4.67	CAG	43	4.79	NA	NA	NA	1.18841	0.673913	1.11594	0.685851	1.35572	0.847322	0.175	0.145	2.825	-0.0731107	0.6652	6.88716	7.24517	-0.320362	0.0516	9.04664
SPAC32A11.01.1	SPAC32A11.01.1_Intron2	I	2445968	2446051	+	83	749	1663	689	1534	2495	2352	2163	2	2	1	SPAC32A11.01.1_Exon2	497	SPAC32A11.01.1_Exon3	1664	0.363126	0.325301	0.350101	0.364183	GTAAGT	6	9.48	TAG	83	5.14	2.03614	0	0	4.32394	0.287726	0.780684	2.8095	0.304087	0.0643029	NA	NA	NA	0.920987	0.0001	3.02882	1.59967	-4.18363	5e-05	29.0689
SPAC32A11.01.1	SPAC32A11.01.1_Intron1	I	2445412	2445472	+	60	193	2242	133	2113	2495	2352	2163	2	1	2	SPAC32A11.01.1_Exon1	194	SPAC32A11.01.1_Exon2	497	0.363126	0.333333	0.417526	0.350101	GTAGGA	6	4.81	CAG	60	4.79	NA	NA	NA	0.592784	0.0618557	0.57732	4.32394	0.287726	0.780684	NA	NA	NA	0.920987	0.0001	3.02882	1.59967	-4.18363	5e-05	29.0689
SPAC32A11.04c.1	SPAC32A11.04c.1_Intron1	I	2444921	2445001	-	80	39	1032	30	936	1151	1071	966	1	1	1	SPAC32A11.04c.1_Exon2	40	SPAC32A11.04c.1_Exon1	1033	0.369244	0.2	0.5	0.377541	GTATGT	6	8.68	TAG	80	5.14	0.0375	0	0	NA	NA	NA	1.60794	119.908	90.6244	NA	NA	NA	-0.22177	0.21705	711.502	829.727	5.60625	5e-05	17.0328
SPAC343.07.1	SPAC343.07.1_Intron1	I	1651141	1651184	+	43	130	1797	130	1797	1970	1830	1830	3	1	3	SPAC343.07.1_Exon1	131	SPAC343.07.1_Exon2	158	0.36599	0.232558	0.374046	0.360759	GTAATC	6	3.06	AAG	43	3.03	NA	NA	NA	NA	NA	NA	NA	NA	NA	NA	NA	NA	0.0691822	0.6857	13.31	12.6868	-0.654521	0.0002	19.9703
SPAC343.07.1	SPAC343.07.1_Intron3	I	1652076	1652126	+	50	1065	855	1065	855	1970	1830	1830	3	3	1	SPAC343.07.1_Exon3	689	SPAC343.07.1_Exon4	856	0.36599	0.28	0.377358	0.376168	GTATTA	6	1.68	TAG	50	5.14	NA	NA	NA	NA	NA	NA	0.0221963	0.00817757	0.129673	NA	NA	NA	0.0691822	0.6857	13.31	12.6868	-0.654521	0.0002	19.9703
SPAC343.07.1	SPAC343.07.1_Intron2	I	1651341	1651388	+	47	330	1593	330	1593	1970	1830	1830	3	2	2	SPAC343.07.1_Exon2	158	SPAC343.07.1_Exon3	689	0.36599	0.255319	0.360759	0.377358	GTACGT	6	8.33	TAG	47	5.14	NA	NA	NA	NA	NA	NA	NA	NA	NA	NA	NA	NA	0.0691822	0.6857	13.31	12.6868	-0.654521	0.0002	19.9703
SPAC343.18.1	SPAC343.18.1_Intron1	I	1680435	1680488	+	53	231	983	22	596	1267	1214	618	1	1	1	SPAC343.18.1_Exon1	232	SPAC343.18.1_Exon2	984	0.356748	0.301887	0.331897	0.36687	GTAAGT	6	9.48	TAG	53	5.14	0.811321	0	0	1.37931	1.38793	4.07759	1.53354	1.91362	0.78252	0.38	0.3	0.04	-0.239788	0.1653	7.59381	8.96691	-0.789495	5e-05	15.499
SPAC3A12.04c.1	SPAC3A12.04c.1_Intron1	I	1425161	1425230	-	69	332	465	332	465	866	708	708	3	3	1	SPAC3A12.04c.1_Exon2	100	SPAC3A12.04c.1_Exon1	466	0.352194	0.289855	0.35	0.381974	GTACGT	6	8.33	TAG	69	5.14	0.666667	0.101449	0	3.21	1.15	9.51	3.03219	1.48927	7.17382	1.5	0.545	1.065	-0.305241	0.1918	6.31829	7.80703	-1.89348	5e-05	29.0055
SPAC3A12.04c.1	SPAC3A12.04c.1_Intron3	I	1425430	1425477	-	47	85	734	85	734	866	708	708	3	1	3	SPAC3A12.04c.1_Exon4	86	SPAC3A12.04c.1_Exon3	60	0.352194	0.255319	0.360465	0.35	GTATGT	6	8.68	AAG	47	3.03	0.617021	0	0.191489	0.755814	0.186047	7.95349	2.45	1.03333	7.95	1.5	0.545	1.065	-0.305241	0.1918	6.31829	7.80703	-1.89348	5e-05	29.0055
SPAC3A12.04c.1	SPAC3A12.04c.1_Intron2	I	1425329	1425371	-	42	191	633	191	633	866	708	708	3	2	2	SPAC3A12.04c.1_Exon3	60	SPAC3A12.04c.1_Exon2	100	0.352194	0.261905	0.35	0.35	GTATGG	6	6.77	TAG	42	5.14	NA	NA	NA	2.45	1.03333	7.95	3.21	1.15	9.51	1.5	0.545	1.065	-0.305241	0.1918	6.31829	7.80703	-1.89348	5e-05	29.0055
SPAC3A12.19.1	SPAC3A12.19.1_Intron1	I	1433153	1433198	-	45	217	381	177	105	643	598	282	1	1	1	SPAC3A12.19.1_Exon2	218	SPAC3A12.19.1_Exon1	382	0.365474	0.177778	0.431193	0.350785	GTATGT	6	8.68	AAG	45	3.03	1.26667	0	0	2.72018	0.302752	27.2156	3.80105	0.76178	5.11518	3.41	0.37	3.385	-0.145321	0.84145	4.46803	4.94154	-3.07011	0.00025	41.5008
SPAC3C7.03c.1	SPAC3C7.03c.1_Intron1	I	2067704	2067748	-	44	156	1263	16	1037	1463	1419	1053	1	1	1	SPAC3C7.03c.1_Exon2	157	SPAC3C7.03c.1_Exon1	1264	0.367054	0.409091	0.33121	0.370253	GTATGC	6	7.58	TAG	44	5.14	NA	NA	NA	1.63694	0.152866	1.09554	2.37896	0.53481	2.06329	NA	NA	NA	0.143551	0.5468	3.59674	3.25608	-2.8733	5e-05	23.8585
SPAC3F10.06c.1	SPAC3F10.06c.1_Intron1	I	2828349	2828628	-	279	59	1303	59	1303	1641	1362	1362	1	1	1	SPAC3F10.06c.1_Exon2	60	SPAC3F10.06c.1_Exon1	1304	0.391225	0.297491	0.45	0.408742	GTAAGT	6	9.48	AAG	279	3.03	1.88172	0.09319	0.168459	2.35	0.583333	3.08333	4.56288	1.41028	5.90184	3.695	1.455	0.535	0.101281	0.83685	7.7339	7.20959	-2.57604	5e-05	42.9907
SPAC3F10.10c.1	SPAC3F10.10c.1_Intron1	I	2836067	2836117	-	50	51	2837	-1079	2177	2938	2888	1098	1	1	1	SPAC3F10.10c.1_Exon2	52	SPAC3F10.10c.1_Exon1	2838	0.363513	0.26	0.307692	0.366455	GTGAGT	6	5.61	CAG	50	4.79	NA	NA	NA	NA	NA	NA	0.711416	0.315363	0.240662	NA	NA	NA	-0.196956	0.50155	14.5476	16.6756	-0.0903783	0.71335	17.7536
SPAC3G6.01.1	SPAC3G6.01.1_Intron1	I	5377926	5378421	+	495	98	4492	-5	4229	5085	4533	4167	2	1	2	SPAC3G6.01.1_Exon1	99	SPAC3G6.01.1_Exon2	198	0.377384	0.321212	0.323232	0.459596	GTAAGT	6	9.48	TAG	495	5.14	NA	NA	NA	NA	NA	NA	10.0152	0.676768	9.71717	0.32	0.27	5.54	0.51854	5e-05	14.154	9.88056	-2.33987	5e-05	50.0211
SPAC3G6.01.1	SPAC3G6.01.1_Intron2	I	5378618	5378675	+	57	790	4238	192	3975	5085	4533	4167	2	2	1	SPAC3G6.01.1_Exon2	198	SPAC3G6.01.1_Exon3	4239	0.377384	0.245614	0.459596	0.383345	GTATGT	6	8.68	TAG	57	5.14	3.68421	0	0	10.0152	0.676768	9.71717	5.28073	1.94669	6.0059	0.32	0.27	5.54	0.51854	5e-05	14.154	9.88056	-2.33987	5e-05	50.0211
SPAC3G9.03.1	SPAC3G9.03.1_Intron1	I	3179709	3179820	-	111	213	367	172	248	691	580	420	1	1	1	SPAC3G9.03.1_Exon2	214	SPAC3G9.03.1_Exon1	368	0.424023	0.36036	0.476636	0.413043	GTATGT	6	8.68	TAG	111	5.14	3.21622	0.648649	1.27027	6.35981	126.706	426.981	19.3777	416.861	396.543	NA	NA	NA	-1.03863	0.0001	1850	3800.41	4.335	5e-05	188.307
SPAC3G9.16c.1	SPAC3G9.16c.1_Intron1	I	3145250	3145297	+	47	37	431	37	431	515	468	468	1	1	1	SPAC3G9.16c.1_Exon1	38	SPAC3G9.16c.1_Exon2	432	0.359223	0.340426	0.236842	0.375	GTATGC	6	7.58	TAG	47	5.14	1.23404	0	0	1.60526	0.631579	15.7632	2.08333	1.66435	11.9653	1.21	2.75	11.165	0.639163	0.0064	21.6344	13.8911	-1.31609	5e-05	34.5876
SPAC3H1.05.1	SPAC3H1.05.1_Intron1	I	1939004	1939074	+	70	726	1463	105	1320	2259	2189	1425	1	1	1	SPAC3H1.05.1_Exon1	727	SPAC3H1.05.1_Exon2	1464	0.332448	0.214286	0.310867	0.349044	GTATAT	6	3.74	TAG	70	5.14	0.671429	0.0428571	0	0.137552	0.114168	0.631362	3.88593	16.209	48.2999	NA	NA	NA	-0.236802	0.6489	64.2136	75.6679	1.25218	0.01835	31.7664
SPAC3H8.09c.1	SPAC3H8.09c.1_Intron1	I	604959	605014	-	55	2728	648	1835	464	3431	3294	2217	2	2	1	SPAC3H8.09c.1_Exon2	342	SPAC3H8.09c.1_Exon1	649	0.35121	0.290909	0.406433	0.368259	GTACGT	6	8.33	TAG	55	5.14	NA	NA	NA	1.89766	0.745614	0.304094	1.05085	0.956857	0.674884	NA	NA	NA	0.106996	0.50975	3.99524	3.70966	-2.17336	5e-05	16.7333
SPAC3H8.09c.1	SPAC3H8.09c.1_Intron2	I	605355	605437	-	82	2305	1044	1412	860	3431	3294	2217	2	1	2	SPAC3H8.09c.1_Exon3	2306	SPAC3H8.09c.1_Exon2	342	0.35121	0.329268	0.34085	0.406433	GTAAGG	6	7.57	CAG	82	4.79	1.12195	0.231707	0.609756	1.52819	0.269297	0.415438	1.89766	0.745614	0.304094	NA	NA	NA	0.106996	0.50975	3.99524	3.70966	-2.17336	5e-05	16.7333
SPAC458.04c.1	SPAC458.04c.1_Intron1	I	4738147	4738188	-	41	774	667	666	543	1482	1315	1083	4	4	1	SPAC458.04c.1_Exon2	96	SPAC458.04c.1_Exon1	668	0.324561	0.317073	0.354167	0.303892	GTAAGA	6	7.8	TAG	41	5.14	NA	NA	NA	NA	NA	NA	0.299401	0.161677	0.179641	NA	NA	NA	-0.59308	0.74255	0.90795	1.36961	-2.8359	0.1243	9.77886
SPAC458.04c.1	SPAC458.04c.1_Intron2	I	4738283	4738329	-	46	633	803	525	679	1482	1315	1083	4	3	2	SPAC458.04c.1_Exon3	226	SPAC458.04c.1_Exon2	96	0.324561	0.326087	0.358407	0.354167	GTAAGA	6	7.8	TAG	46	5.14	NA	NA	NA	0.59292	0.0973451	0.327434	NA	NA	NA	NA	NA	NA	-0.59308	0.74255	0.90795	1.36961	-2.8359	0.1243	9.77886
SPAC458.04c.1	SPAC458.04c.1_Intron4	I	4738740	4738778	-	38	184	1260	76	1136	1482	1315	1083	4	1	4	SPAC458.04c.1_Exon5	185	SPAC458.04c.1_Exon4	145	0.324561	0.289474	0.324324	0.351724	GTACGC	6	7.24	TAG	38	5.14	NA	NA	NA	0.151351	0.0486486	0.145946	0.6	0.386207	0.4	NA	NA	NA	-0.59308	0.74255	0.90795	1.36961	-2.8359	0.1243	9.77886
SPAC458.04c.1	SPAC458.04c.1_Intron3	I	4738554	4738596	-	42	366	1074	258	950	1482	1315	1083	4	2	3	SPAC458.04c.1_Exon4	145	SPAC458.04c.1_Exon3	226	0.324561	0.404762	0.351724	0.358407	GTACGC	6	7.24	TAG	42	5.14	0.357143	0	0.690476	0.6	0.386207	0.4	0.59292	0.0973451	0.327434	NA	NA	NA	-0.59308	0.74255	0.90795	1.36961	-2.8359	0.1243	9.77886
SPAC458.06.1	SPAC458.06.1_Intron1	I	4742983	4743034	+	51	175	1312	115	1133	1538	1334	1095	4	1	4	SPAC458.06.1_Exon1	176	SPAC458.06.1_Exon2	102	0.343953	0.27451	0.375	0.392157	GTAAGT	6	9.48	TAG	51	5.14	NA	NA	NA	1.61364	0.284091	0.3125	1.80392	0.921569	1.91176	0.355	0	0.475	0.014522	0.96155	5.36564	5.3119	-1.03732	0.0013	10.9022
SPAC458.06.1	SPAC458.06.1_Intron2	I	4743135	4743183	+	48	327	1163	267	984	1538	1334	1095	4	2	3	SPAC458.06.1_Exon2	102	SPAC458.06.1_Exon3	90	0.343953	0.3125	0.392157	0.344444	GTAAGT	6	9.48	CAG	48	4.79	NA	NA	NA	1.80392	0.921569	1.91176	1.84444	0.944444	0.188889	0.355	0	0.475	0.014522	0.96155	5.36564	5.3119	-1.03732	0.0013	10.9022
SPAC458.06.1	SPAC458.06.1_Intron3	I	4743272	4743328	+	56	464	1018	404	839	1538	1334	1095	4	3	2	SPAC458.06.1_Exon3	90	SPAC458.06.1_Exon4	93	0.343953	0.303571	0.344444	0.354839	GTACGT	6	8.33	AAG	56	3.03	1.375	0	0.0357143	1.84444	0.944444	0.188889	1.72043	0.774194	0.408602	0.355	0	0.475	0.014522	0.96155	5.36564	5.3119	-1.03732	0.0013	10.9022
SPAC458.06.1	SPAC458.06.1_Intron4	I	4743420	4743469	+	49	612	877	552	698	1538	1334	1095	4	4	1	SPAC458.06.1_Exon4	93	SPAC458.06.1_Exon5	878	0.343953	0.367347	0.354839	0.341686	GTAAGA	6	7.8	TAG	49	5.14	NA	NA	NA	1.72043	0.774194	0.408602	0.95672	1.08314	1.49203	0.355	0	0.475	0.014522	0.96155	5.36564	5.3119	-1.03732	0.0013	10.9022
SPAC4A8.12c.1	SPAC4A8.12c.1_Intron1	I	2574295	2574350	-	55	291	1136	123	876	1482	1427	999	1	1	1	SPAC4A8.12c.1_Exon2	292	SPAC4A8.12c.1_Exon1	1137	0.332659	0.2	0.386986	0.325418	GTAAAT	6	4.54	TAG	55	5.14	2.16364	1.63636	0	1.77055	1.18836	8.46918	1.76429	5.97977	4.96658	NA	NA	NA	-0.0645676	0.6358	23.5857	24.6652	0.548684	0.0001	16.8622
SPAC4A8.15c.1	SPAC4A8.15c.1_Intron1	I	2579027	2579083	-	56	431	72	395	38	559	454	384	2	2	1	SPAC4A8.15c.1_Exon2	334	SPAC4A8.15c.1_Exon1	73	0.389982	0.267857	0.452096	0.342466	GTAAGT	6	9.48	TAG	56	5.14	4.01786	2.08929	0	8.72455	169.988	262.356	5.65753	92.3562	282.247	1.05	0.17	0.04	-0.299202	0.06175	1151.79	1417.24	3.7942	5e-05	102.159
SPAC4A8.15c.1	SPAC4A8.15c.1_Intron2	I	2579416	2579465	-	49	49	461	13	427	559	454	384	2	1	2	SPAC4A8.15c.1_Exon3	50	SPAC4A8.15c.1_Exon2	334	0.389982	0.22449	0.36	0.452096	GTTTGT	6	3.87	TAG	49	5.14	2.87755	2.22449	0.387755	3.28	10.46	18.94	8.72455	169.988	262.356	1.05	0.17	0.04	-0.299202	0.06175	1151.79	1417.24	3.7942	5e-05	102.159
SPAC4D7.02c.1	SPAC4D7.02c.1_Intron1	I	5353425	5353556	-	131	186	1327	116	820	1644	1513	936	1	1	1	SPAC4D7.02c.1_Exon2	187	SPAC4D7.02c.1_Exon1	1328	0.347324	0.282443	0.40107	0.347139	GTATGT	6	8.68	CAG	131	4.79	0.854962	0.21374	0	0.716578	0.721925	5.08556	1.13855	2.29142	6.72139	NA	NA	NA	0.0627363	0.67965	15.6073	14.9432	-0.169289	0.26205	16.8037
SPAC4D7.08c.1	SPAC4D7.08c.1_Intron1	I	5365964	5366339	-	375	200	1977	-3	1605	2552	2177	1602	1	1	1	SPAC4D7.08c.1_Exon2	201	SPAC4D7.08c.1_Exon1	1978	0.377743	0.306667	0.343284	0.395349	GTAAGT	6	9.48	TAG	375	5.14	11.7547	0.266667	32.752	1.25373	0.383085	0.577114	12.9307	35.2315	45.4692	3.125	0.2	1.755	-0.277513	0.4521	145.642	176.533	0.632916	0.05775	113.841
SPAC4F10.02.1	SPAC4F10.02.1_Intron1	I	4833160	4833256	+	96	282	1314	232	1172	1692	1596	1404	1	1	1	SPAC4F10.02.1_Exon1	283	SPAC4F10.02.1_Exon2	1315	0.382979	0.302083	0.34629	0.396958	GTAAGT	6	9.48	TAG	96	5.14	NA	NA	NA	3.99647	2.88693	7.91519	2.48137	5.15057	7.35741	0.57	0.08	0.11	0.0607046	0.6481	28.2596	27.0952	-0.181964	0.1627	30.7375
SPAC4F10.08.1	SPAC4F10.08.1_Intron1	I	4844140	4844196	+	56	362	2199	-658	1933	2617	2431	1197	4	1	4	SPAC4F10.08.1_Exon1	363	SPAC4F10.08.1_Exon2	85	0.335117	0.25	0.305785	0.341176	GTACGG	6	6.42	TAG	56	5.14	0.25	0	0	0.203857	0.118457	0.316804	0.294118	0.0470588	0.0588235	NA	NA	NA	0.390098	1	0.569228	0.434365	-2.39869	0.0004	2.29051
SPAC4F10.08.1	SPAC4F10.08.1_Intron4	I	4846063	4846103	+	40	2285	292	1209	26	2617	2431	1197	4	4	1	SPAC4F10.08.1_Exon4	202	SPAC4F10.08.1_Exon5	293	0.335117	0.275	0.351485	0.300341	GTAAGT	6	9.48	TAG	40	5.14	0.125	0.25	0	0.207921	0.5	0.351485	0.187713	0.37884	0.638225	NA	NA	NA	0.390098	1	0.569228	0.434365	-2.39869	0.0004	2.29051
SPAC4F10.08.1	SPAC4F10.08.1_Intron3	I	4845824	4845862	+	38	2046	533	970	267	2617	2431	1197	4	3	2	SPAC4F10.08.1_Exon3	1493	SPAC4F10.08.1_Exon4	202	0.335117	0.210526	0.356999	0.351485	GTAAGT	6	9.48	TAG	38	5.14	NA	NA	NA	0.311453	0.119893	0.101139	0.207921	0.5	0.351485	NA	NA	NA	0.390098	1	0.569228	0.434365	-2.39869	0.0004	2.29051
SPAC4F10.08.1	SPAC4F10.08.1_Intron2	I	4844280	4844332	+	52	502	2063	-522	1797	2617	2431	1197	4	2	3	SPAC4F10.08.1_Exon2	85	SPAC4F10.08.1_Exon3	1493	0.335117	0.326923	0.341176	0.356999	GTAATG	6	2.25	AAG	52	3.03	NA	NA	NA	0.294118	0.0470588	0.0588235	0.311453	0.119893	0.101139	NA	NA	NA	0.390098	1	0.569228	0.434365	-2.39869	0.0004	2.29051
SPAC4F10.15c.1	SPAC4F10.15c.1_Intron1	I	4861564	4861623	-	59	1893	312	1825	35	2264	2070	1725	3	3	1	SPAC4F10.15c.1_Exon2	134	SPAC4F10.15c.1_Exon1	313	0.439488	0.288136	0.455224	0.325879	GTATGT	6	8.68	CAG	59	4.79	0.627119	0	0	1.90299	6.0597	7.83582	1.60383	3.98722	0.492013	4.49	11.73	28.075	0.121029	0.93795	3.46201	3.18343	0.157734	0.8599	2.85373
SPAC4F10.15c.1	SPAC4F10.15c.1_Intron2	I	4861756	4861806	-	50	1710	504	1642	227	2264	2070	1725	3	2	2	SPAC4F10.15c.1_Exon3	1342	SPAC4F10.15c.1_Exon2	134	0.439488	0.26	0.500745	0.455224	GTAAGT	6	9.48	CAG	50	4.79	NA	NA	NA	1.41133	2.71982	10.655	1.90299	6.0597	7.83582	4.49	11.73	28.075	0.121029	0.93795	3.46201	3.18343	0.157734	0.8599	2.85373
SPAC4F10.15c.1	SPAC4F10.15c.1_Intron3	I	4863147	4863232	-	85	284	1895	216	1618	2264	2070	1725	3	1	3	SPAC4F10.15c.1_Exon4	285	SPAC4F10.15c.1_Exon3	1342	0.439488	0.294118	0.382456	0.500745	GTATGT	6	8.68	TAG	85	5.14	0.517647	0	0.282353	2.00351	1.06667	9.3193	1.41133	2.71982	10.655	4.49	11.73	28.075	0.121029	0.93795	3.46201	3.18343	0.157734	0.8599	2.85373
SPAC4F10.20.1	SPAC4F10.20.1_Intron2	I	4874436	4874604	+	168	272	447	168	355	887	502	306	3	2	2	SPAC4F10.20.1_Exon2	54	SPAC4F10.20.1_Exon3	99	0.343856	0.327381	0.462963	0.414141	GTACGT	6	8.33	TAG	168	5.14	5.79762	0.52381	0.0892857	5.55556	124.537	221.074	7.16162	156.848	260.485	NA	NA	NA	-0.326198	0.0203	661.512	829.341	3.8354	5e-05	58.0981
SPAC4F10.20.1	SPAC4F10.20.1_Intron3	I	4874702	4874825	+	123	538	226	434	134	887	502	306	3	3	1	SPAC4F10.20.1_Exon3	99	SPAC4F10.20.1_Exon4	227	0.343856	0.300813	0.414141	0.343612	GTAAGT	6	9.48	TAG	123	5.14	3.21138	0.357724	0	7.16162	156.848	260.485	6.55066	76.8722	201.956	NA	NA	NA	-0.326198	0.0203	661.512	829.341	3.8354	5e-05	58.0981
SPAC4F10.20.1	SPAC4F10.20.1_Intron1	I	4874289	4874383	+	94	125	668	21	576	887	502	306	3	1	3	SPAC4F10.20.1_Exon1	126	SPAC4F10.20.1_Exon2	54	0.343856	0.361702	0.309524	0.462963	GTACGT	6	8.33	TAG	94	5.14	1.57447	0.117021	0.382979	0.396825	14.7778	26.0397	5.55556	124.537	221.074	NA	NA	NA	-0.326198	0.0203	661.512	829.341	3.8354	5e-05	58.0981
SPAC4G8.07c.1	SPAC4G8.07c.1_Intron3	I	775290	775413	-	123	649	1291	600	1291	2063	1633	1584	4	2	3	SPAC4G8.07c.1_Exon4	101	SPAC4G8.07c.1_Exon3	839	0.354338	0.300813	0.405941	0.379023	GTAAGT	6	9.48	TAG	123	5.14	0.560976	0	0	4.12871	0.594059	34.9604	3.7199	1.18355	8.09058	3.215	2.88	2.95	-0.132594	0.74125	5.5737	6.11024	-2.38177	5e-05	31.8451
SPAC4G8.07c.1	SPAC4G8.07c.1_Intron4	I	775513	775640	-	127	422	1514	373	1514	2063	1633	1584	4	1	4	SPAC4G8.07c.1_Exon5	423	SPAC4G8.07c.1_Exon4	101	0.354338	0.291339	0.371158	0.405941	GTAAGT	6	9.48	CAG	127	4.79	0.80315	0	0.267717	2.04019	0.27896	3.0591	4.12871	0.594059	34.9604	3.215	2.88	2.95	-0.132594	0.74125	5.5737	6.11024	-2.38177	5e-05	31.8451
SPAC4G8.07c.1	SPAC4G8.07c.1_Intron1	I	774023	774154	-	131	1908	24	1859	24	2063	1633	1584	4	4	1	SPAC4G8.07c.1_Exon2	250	SPAC4G8.07c.1_Exon1	25	0.354338	0.206107	0.376	0.36	GTAAGT	6	9.48	TAG	131	5.14	0.328244	0	0	2.892	1.476	9.276	1.12	0.28	0.92	3.215	2.88	2.95	-0.132594	0.74125	5.5737	6.11024	-2.38177	5e-05	31.8451
SPAC4G8.07c.1	SPAC4G8.07c.1_Intron2	I	774403	774452	-	49	1610	404	1561	404	2063	1633	1584	4	3	2	SPAC4G8.07c.1_Exon3	839	SPAC4G8.07c.1_Exon2	250	0.354338	0.306122	0.379023	0.376	GTAAGG	6	7.57	TAG	49	5.14	0.714286	0	0	3.7199	1.18355	8.09058	2.892	1.476	9.276	3.215	2.88	2.95	-0.132594	0.74125	5.5737	6.11024	-2.38177	5e-05	31.8451
SPAC4G8.08.1	SPAC4G8.08.1_Intron1	I	777287	777337	+	50	111	1161	29	946	1322	1113	816	2	1	2	SPAC4G8.08.1_Exon1	112	SPAC4G8.08.1_Exon2	395	0.350227	0.28	0.383929	0.405063	GTACAT	6	3.4	AAG	50	3.03	1.06	0	0	1.08036	0.964286	4.48214	1.71392	4.95443	5.33924	2.28	0.33	1.305	-0.45388	0.1272	11.0725	15.1663	0.937224	0.0109	7.92039
SPAC4G8.08.1	SPAC4G8.08.1_Intron2	I	777731	777890	+	159	555	608	473	393	1322	1113	816	2	2	1	SPAC4G8.08.1_Exon2	395	SPAC4G8.08.1_Exon3	609	0.350227	0.213836	0.405063	0.351396	GTATGT	6	8.68	TAG	159	5.14	0.91195	0.352201	0	1.71392	4.95443	5.33924	1.07882	4.5468	3.17077	2.28	0.33	1.305	-0.45388	0.1272	11.0725	15.1663	0.937224	0.0109	7.92039
SPAC4G8.11c.1	SPAC4G8.11c.1_Intron2	I	782704	782802	-	98	832	1358	342	563	2288	2089	804	2	1	2	SPAC4G8.11c.1_Exon3	833	SPAC4G8.11c.1_Exon2	268	0.335227	0.214286	0.32413	0.36194	GTATGA	6	7	TAG	98	5.14	0.22449	0	0	0.381753	0.707083	1.72629	0.526119	1.29851	5.15299	0.3	0.035	0.27	-0.73321	0.30845	0.490538	0.815439	0.227101	0.725	0.69667
SPAC4G8.11c.1	SPAC4G8.11c.1_Intron1	I	782336	782437	-	101	1197	990	707	195	2288	2089	804	2	2	1	SPAC4G8.11c.1_Exon2	268	SPAC4G8.11c.1_Exon1	991	0.335227	0.336634	0.36194	0.35116	GTAAGT	6	9.48	CAG	101	4.79	0.168317	0	0	0.526119	1.29851	5.15299	0.338042	0.423814	0.39556	0.3	0.035	0.27	-0.73321	0.30845	0.490538	0.815439	0.227101	0.725	0.69667
SPAC4G9.05.1	SPAC4G9.05.1_Intron1	I	2259572	2259621	+	49	220	2981	-321	2180	3250	3088	1746	3	1	3	SPAC4G9.05.1_Exon1	221	SPAC4G9.05.1_Exon2	1087	0.336615	0.265306	0.271493	0.349586	GTATGA	6	7	AAG	49	3.03	NA	NA	NA	0.167421	0.0316742	0.135747	0.344066	0.0128795	0.0653174	NA	NA	NA	-1.7221	1	0.030261	0.0998364	-3.37807	0.25925	1.03798
SPAC4G9.05.1	SPAC4G9.05.1_Intron2	I	2260707	2260778	+	71	1355	1824	765	1023	3250	3088	1746	3	2	2	SPAC4G9.05.1_Exon2	1087	SPAC4G9.05.1_Exon3	535	0.336615	0.267606	0.349586	0.330841	GTAAGT	6	9.48	TAG	71	5.14	NA	NA	NA	0.344066	0.0128795	0.0653174	NA	NA	NA	NA	NA	NA	-1.7221	1	0.030261	0.0998364	-3.37807	0.25925	1.03798
SPAC4G9.05.1	SPAC4G9.05.1_Intron3	I	2261312	2261354	+	42	1960	1248	1370	447	3250	3088	1746	3	3	1	SPAC4G9.05.1_Exon3	535	SPAC4G9.05.1_Exon4	1249	0.336615	0.238095	0.330841	0.350681	GTACGT	6	8.33	TAG	42	5.14	NA	NA	NA	NA	NA	NA	0.138511	0.0672538	0.0120096	NA	NA	NA	-1.7221	1	0.030261	0.0998364	-3.37807	0.25925	1.03798
SPAC4H3.06.1	SPAC4H3.06.1_Intron2	I	3837751	3837810	+	59	446	1816	321	190	2321	2165	414	3	2	2	SPAC4H3.06.1_Exon2	185	SPAC4H3.06.1_Exon3	81	0.338216	0.220339	0.372973	0.37037	GTAAAT	6	4.54	CAG	59	4.79	0.423729	0.644068	2.47458	1.53514	8.36757	8.46486	1.25926	5.53086	7.69136	NA	NA	NA	-0.262316	0.334	13.1751	15.8023	1.12085	5e-05	7.26622
SPAC4H3.06.1	SPAC4H3.06.1_Intron3	I	3837890	3837939	+	49	585	1687	460	61	2321	2165	414	3	3	1	SPAC4H3.06.1_Exon3	81	SPAC4H3.06.1_Exon4	1688	0.338216	0.183673	0.37037	0.350711	GTAAAT	6	4.54	TAG	49	5.14	0.163265	0	0	1.25926	5.53086	7.69136	0.353081	1.73104	0.334716	NA	NA	NA	-0.262316	0.334	13.1751	15.8023	1.12085	5e-05	7.26622
SPAC4H3.06.1	SPAC4H3.06.1_Intron1	I	3837519	3837567	+	48	214	2059	89	433	2321	2165	414	3	1	3	SPAC4H3.06.1_Exon1	215	SPAC4H3.06.1_Exon2	185	0.338216	0.229167	0.302326	0.372973	GTAAGT	6	9.48	TAG	48	5.14	0.104167	0	0	0.186047	0.725581	2.82326	1.53514	8.36757	8.46486	NA	NA	NA	-0.262316	0.334	13.1751	15.8023	1.12085	5e-05	7.26622
SPAC513.03.1	SPAC513.03.1_Intron1	I	2913020	2913062	-	42	208	259	122	13	509	467	135	1	1	1	SPAC513.03.1_Exon2	209	SPAC513.03.1_Exon1	260	0.280943	0.214286	0.311005	0.273077	GTAAGA	6	7.8	TAG	42	5.14	0.214286	0	1.38095	0.54067	4.86124	16.2488	0.880769	12.8423	2.97308	NA	NA	NA	-0.573715	0.00015	59.5148	88.5789	2.86145	5e-05	12.1884
SPAC56E4.04c.1	SPAC56E4.04c.1_Intron1	I	1252807	1253429	-	622	130	7092	130	6713	7844	7222	6843	1	1	1	SPAC56E4.04c.1_Exon2	131	SPAC56E4.04c.1_Exon1	7093	0.402601	0.345659	0.503817	0.405893	GTATGT	6	8.68	TAG	622	5.14	11.1977	0.0578778	0.0321543	2.96947	0.305344	13.4656	28.5824	20.2173	41.6905	NA	NA	NA	0.117495	0.65035	111.439	102.723	-1.30111	5e-05	253.128
SPAC56F8.04c.1	SPAC56F8.04c.1_Intron1	I	1134283	1134331	-	48	25	1058	25	1058	1131	1083	1083	1	1	1	SPAC56F8.04c.1_Exon2	26	SPAC56F8.04c.1_Exon1	1059	0.411141	0.3125	0.423077	0.415486	GTGTCA	6	-3.13	TAG	48	5.14	1.45833	0.458333	6.29167	1.03846	0	1.38462	1.78281	6.85175	17.3994	1.19	6.275	0.075	0.370287	0.0044	54.6867	42.3072	1.06596	5e-05	20.2082
SPAC56F8.08.1	SPAC56F8.08.1_Intron1	I	1139333	1139447	+	114	204	878	204	795	1196	1082	999	1	1	1	SPAC56F8.08.1_Exon1	205	SPAC56F8.08.1_Exon2	879	0.397157	0.333333	0.365854	0.412969	GTACGT	6	8.33	TAG	114	5.14	0.596491	0.149123	0	2.71707	9.39024	14.6439	1.76792	13.4619	8.52218	NA	NA	NA	0.255111	0.0414	82.529	69.153	1.86442	5e-05	18.9917
SPAC57A10.04.1	SPAC57A10.04.1_Intron1	I	1370394	1370457	+	63	239	1044	216	819	1346	1283	1035	1	1	1	SPAC57A10.04.1_Exon1	240	SPAC57A10.04.1_Exon2	1045	0.339525	0.285714	0.358333	0.338756	GTAACG	6	1.31	TAG	63	5.14	NA	NA	NA	1.2625	0.0583333	0.270833	0.916746	0.0861244	0.127273	NA	NA	NA	-0.156502	0.78625	1.36881	1.52565	-2.79833	5e-05	10.6129
SPAC57A10.06.1	SPAC57A10.06.1_Intron1	I	1376947	1377031	+	84	361	41	361	41	486	402	402	1	1	1	SPAC57A10.06.1_Exon1	362	SPAC57A10.06.1_Exon2	42	0.358025	0.214286	0.400552	0.285714	GTATGC	6	7.58	TAG	84	5.14	0.166667	0.047619	0	0.31768	0.707182	1	0.119048	0.285714	1.04762	0.12	0.145	0.075	-1.53816	0.00235	2.42306	7.03713	0.396592	0.26695	5.34576
SPAC57A7.12.1	SPAC57A7.12.1_Intron1	I	1516663	1516788	-	125	171	1722	126	1575	2018	1893	1701	1	1	1	SPAC57A7.12.1_Exon2	172	SPAC57A7.12.1_Exon1	1723	0.415263	0.32	0.343023	0.429483	GTAAGA	6	7.8	CAG	125	4.79	2.344	0	0	2.5	5.32558	59.4651	12.354	86.6918	163.77	NA	NA	NA	-0.583409	0.0018	314.172	470.751	2.09053	5e-05	110.53
SPAC589.02c.1	SPAC589.02c.1_Intron1	I	3098590	3098625	-	35	258	3516	258	3516	3809	3678	3678	2	2	1	SPAC589.02c.1_Exon2	157	SPAC589.02c.1_Exon1	3517	0.352849	0.142857	0.363057	0.357976	GTAATT	6	4.16	AAG	35	3.03	NA	NA	NA	NA	NA	NA	2.74922	0.256184	0.859255	NA	NA	NA	0.413774	0.39065	2.01242	1.51064	-4.14229	5e-05	26.6757
SPAC589.02c.1	SPAC589.02c.1_Intron2	I	3098781	3098877	-	96	6	3707	6	3707	3809	3678	3678	2	1	2	SPAC589.02c.1_Exon3	7	SPAC589.02c.1_Exon2	157	0.352849	0.239583	0.285714	0.363057	GTATAT	6	3.74	AAG	96	3.03	NA	NA	NA	NA	NA	NA	NA	NA	NA	NA	NA	NA	0.413774	0.39065	2.01242	1.51064	-4.14229	5e-05	26.6757
SPAC589.07c.1	SPAC589.07c.1_Intron3	I	3105378	3105440	-	62	468	1278	468	1036	1808	1364	1122	5	3	3	SPAC589.07c.1_Exon4	108	SPAC589.07c.1_Exon3	161	0.374447	0.370968	0.398148	0.378882	GTAAGC	6	8.38	TAG	62	5.14	NA	NA	NA	1.7037	0.925926	3.65741	0.745342	0.459627	3.83851	NA	NA	NA	0.618882	0.6513	3.95628	2.57623	0.473972	0.69805	1.85484
SPAC589.07c.1	SPAC589.07c.1_Intron4	I	3105547	3105612	-	65	296	1447	296	1205	1808	1364	1122	5	2	4	SPAC589.07c.1_Exon5	75	SPAC589.07c.1_Exon4	108	0.374447	0.246154	0.333333	0.398148	GTAGGT	6	6.49	TAG	65	5.14	NA	NA	NA	0.52	0.32	4.90667	1.7037	0.925926	3.65741	NA	NA	NA	0.618882	0.6513	3.95628	2.57623	0.473972	0.69805	1.85484
SPAC589.07c.1	SPAC589.07c.1_Intron1	I	3104364	3104432	-	68	1476	264	1476	22	1808	1364	1122	5	5	1	SPAC589.07c.1_Exon2	722	SPAC589.07c.1_Exon1	265	0.374447	0.294118	0.422438	0.316981	GTAAGT	6	9.48	TAG	68	5.14	NA	NA	NA	0.707756	1.14681	3.10249	0.418868	2.12453	0.350943	NA	NA	NA	0.618882	0.6513	3.95628	2.57623	0.473972	0.69805	1.85484
SPAC589.07c.1	SPAC589.07c.1_Intron2	I	3105153	3105218	-	65	690	1053	690	811	1808	1364	1122	5	4	2	SPAC589.07c.1_Exon3	161	SPAC589.07c.1_Exon2	722	0.374447	0.307692	0.378882	0.422438	GTAAGC	6	8.38	CAG	65	4.79	0.4	0	0	0.745342	0.459627	3.83851	0.707756	1.14681	3.10249	NA	NA	NA	0.618882	0.6513	3.95628	2.57623	0.473972	0.69805	1.85484
SPAC589.07c.1	SPAC589.07c.1_Intron5	I	3105686	3105870	-	184	38	1586	38	1344	1808	1364	1122	5	1	5	SPAC589.07c.1_Exon6	39	SPAC589.07c.1_Exon5	75	0.374447	0.358696	0.487179	0.333333	GTATGT	6	8.68	TAG	184	5.14	NA	NA	NA	NA	NA	NA	0.52	0.32	4.90667	NA	NA	NA	0.618882	0.6513	3.95628	2.57623	0.473972	0.69805	1.85484
SPAC589.11.1	SPAC589.11.1_Intron1	I	3109312	3109605	+	293	139	410	139	410	842	549	549	1	1	1	SPAC589.11.1_Exon1	140	SPAC589.11.1_Exon2	411	0.307601	0.307167	0.271429	0.321168	GTATGT	6	8.68	TAG	293	5.14	NA	NA	NA	0.264286	0.392857	0.685714	0.262774	0.328467	0.3309	0.325	0.84	0.19	-0.323839	0.3777	2.76324	3.45863	-0.273063	0.4461	4.1793
SPAC589.12.1	SPAC589.12.1_Intron1	I	3110323	3110507	+	184	123	2889	123	2793	3196	3012	2916	1	1	1	SPAC589.12.1_Exon1	124	SPAC589.12.1_Exon2	2890	0.385482	0.358696	0.379032	0.387543	GTAAAT	6	4.54	CAG	184	4.79	3.31522	0.179348	0	4.85484	2.96774	33.1613	4.80969	6.04567	14.4792	1.26	0.33	0.405	0.182664	0.13345	35.428	31.2147	-0.549985	5e-05	45.7006
SPAC630.14c.1	SPAC630.14c.1_Intron1	I	375830	376093	-	263	1815	1515	1107	1148	3593	2872	1797	3	3	1	SPAC630.14c.1_Exon2	354	SPAC630.14c.1_Exon1	1516	0.364041	0.323194	0.446328	0.398417	GTAAGT	6	9.48	CAG	263	4.79	2.54373	0.243346	0.939163	7.02542	6.05085	24.3927	5.13786	10.6306	18.1201	2.315	0.525	0.72	0.130653	0.48815	36.448	33.2922	-0.1138	0.53945	36.0247
SPAC630.14c.1	SPAC630.14c.1_Intron3	I	376931	376992	-	61	916	2616	208	2249	3593	2872	1797	3	1	3	SPAC630.14c.1_Exon4	917	SPAC630.14c.1_Exon3	89	0.364041	0.295082	0.305344	0.404494	GTATCT	6	2.41	TAG	61	5.14	3.39344	0	0	1.33261	0.353326	1.47001	3.95506	1.94382	8.02247	2.315	0.525	0.72	0.130653	0.48815	36.448	33.2922	-0.1138	0.53945	36.0247
SPAC630.14c.1	SPAC630.14c.1_Intron2	I	376446	376843	-	397	1065	2131	357	1764	3593	2872	1797	3	2	2	SPAC630.14c.1_Exon3	89	SPAC630.14c.1_Exon2	354	0.364041	0.329975	0.404494	0.446328	GTATGT	6	8.68	TAG	397	5.14	2.21914	0	0.110831	3.95506	1.94382	8.02247	7.02542	6.05085	24.3927	2.315	0.525	0.72	0.130653	0.48815	36.448	33.2922	-0.1138	0.53945	36.0247
SPAC664.06.1	SPAC664.06.1_Intron1	I	1712939	1713156	+	217	156	765	123	627	1138	921	750	1	1	1	SPAC664.06.1_Exon1	157	SPAC664.06.1_Exon2	766	0.351494	0.285714	0.471338	0.347258	GTATGT	6	8.68	CAG	217	4.79	9.74654	0.940092	13.1889	9.86624	42.2866	21.4586	11.9321	67.1971	63.3081	NA	NA	NA	-1.17142	5e-05	185.932	418.78	1.63746	5e-05	134.605
SPAC688.02c.1	SPAC688.02c.1_Intron1	I	3113999	3114128	-	129	446	548	284	435	1123	908	633	2	2	1	SPAC688.02c.1_Exon2	149	SPAC688.02c.1_Exon1	549	0.341941	0.294574	0.402685	0.367942	GTGAGT	6	5.61	TAG	129	5.14	NA	NA	NA	1.33557	1.36242	2.65772	1.32605	3.7122	2.45719	NA	NA	NA	-0.600693	0.00335	13.2219	20.0503	0.158512	0.40135	17.9641
SPAC688.02c.1	SPAC688.02c.1_Intron2	I	3114276	3114362	-	86	212	825	50	712	1123	908	633	2	1	2	SPAC688.02c.1_Exon3	213	SPAC688.02c.1_Exon2	149	0.341941	0.244186	0.305164	0.402685	GTGTGT	6	4.81	AAG	86	3.03	0.802326	0.0930233	0.837209	1.07042	2.06573	1.6385	1.33557	1.36242	2.65772	NA	NA	NA	-0.600693	0.00335	13.2219	20.0503	0.158512	0.40135	17.9641
SPAC688.03c.1	SPAC688.03c.1_Intron1	I	3114973	3115102	-	129	278	466	224	358	873	744	582	1	1	1	SPAC688.03c.1_Exon2	279	SPAC688.03c.1_Exon1	467	0.378007	0.325581	0.401434	0.381156	GTAAGT	6	9.48	TAG	129	5.14	1.44186	0.0852713	0	1.96057	1.59857	2.32616	1.11991	2.1242	3.57388	0.82	0.755	1.68	-0.218534	0.41915	9.88074	11.4967	-0.370567	0.14245	14.8637
SPAC6B12.08.1	SPAC6B12.08.1_Intron1	I	2426279	2426413	+	134	523	1554	89	1054	2211	2077	1143	1	1	1	SPAC6B12.08.1_Exon1	524	SPAC6B12.08.1_Exon2	1555	0.341022	0.276119	0.337786	0.34791	GTATGA	6	7	CAG	134	4.79	NA	NA	NA	0.812977	0.166031	0.591603	0.598714	0.726045	1.43087	1.245	4.9	2.205	0.263756	0.30855	11.2777	9.3934	-0.540519	0.0299	13.6627
SPAC6B12.15.1	SPAC6B12.15.1_Intron2	I	2440253	2440506	+	253	817	521	722	420	1591	1141	945	2	2	1	SPAC6B12.15.1_Exon2	400	SPAC6B12.15.1_Exon3	522	0.419233	0.312253	0.5	0.438697	GTAAGT	6	9.48	AAG	253	3.03	7.62055	1.12253	3.58893	74.24	593.465	1778.65	43.0326	514.728	1409.68	4.25	12.505	0.09	-0.495342	0.3306	2505	3531.18	3.45385	5e-05	322.261
SPAC6B12.15.1	SPAC6B12.15.1_Intron1	I	2439657	2439854	+	197	221	1173	126	1072	1591	1141	945	2	1	2	SPAC6B12.15.1_Exon1	222	SPAC6B12.15.1_Exon2	400	0.419233	0.304569	0.454955	0.5	GTATGT	6	8.68	CAG	197	4.79	8.61929	1.29949	1.05076	22.1847	159.896	749.104	74.24	593.465	1778.65	4.25	12.505	0.09	-0.495342	0.3306	2505	3531.18	3.45385	5e-05	322.261
SPAC6B12.16.1	SPAC6B12.16.1_Intron1	I	2443634	2443740	+	106	1046	89	946	89	1241	1135	1035	1	1	1	SPAC6B12.16.1_Exon1	1047	SPAC6B12.16.1_Exon2	90	0.35133	0.245283	0.359121	0.388889	GTAAGT	6	9.48	CAG	106	4.79	NA	NA	NA	NA	NA	NA	NA	NA	NA	NA	NA	NA	Inf	1	0.121356	0	#NAME?	1	0.291335
SPAC6C3.03c.1	SPAC6C3.03c.1_Intron1	I	2327498	2327549	-	51	638	1299	-864	1167	1988	1937	303	1	1	1	SPAC6C3.03c.1_Exon2	639	SPAC6C3.03c.1_Exon1	1300	0.355131	0.254902	0.392801	0.341538	GTAATG	6	2.25	TAG	51	5.14	NA	NA	NA	NA	NA	NA	0.0661538	0.147692	0.04	NA	NA	NA	0.0958319	0.84265	7.27851	6.81074	0.490231	0.43435	4.84864
SPAC6F12.11c.1	SPAC6F12.11c.1_Intron1	I	1334921	1335029	-	108	640	1575	114	1257	2323	2215	1371	1	1	1	SPAC6F12.11c.1_Exon2	641	SPAC6F12.11c.1_Exon1	1576	0.36031	0.287037	0.354134	0.368655	GTAAAT	6	4.54	TAG	108	5.14	NA	NA	NA	1.67863	0.475819	1.71139	5.0882	1.60406	2.77792	5.19	0.455	8.96	0.275093	0.78095	7.74549	6.40085	-2.64778	0.0052	40.1143
SPAC6F12.14.1	SPAC6F12.14.1_Intron1	I	1340533	1340825	+	292	314	1623	134	1602	2229	1899	1698	2	1	2	SPAC6F12.14.1_Exon1	315	SPAC6F12.14.1_Exon2	720	0.348138	0.291096	0.336508	0.363889	GTATGC	6	7.58	TAG	292	5.14	0.263699	0.0479452	0.109589	0.88254	0.171429	1.10794	1.07639	0.8375	3.30694	NA	NA	NA	-0.00801423	0.98675	4.78942	4.8161	-0.93961	0.06915	9.23732
SPAC6F12.14.1	SPAC6F12.14.1_Intron2	I	1341544	1341582	+	38	1325	866	1145	845	2229	1899	1698	2	2	1	SPAC6F12.14.1_Exon2	720	SPAC6F12.14.1_Exon3	867	0.348138	0.236842	0.363889	0.365629	GTATAC	6	2.65	CAG	38	4.79	0.263158	0	0	1.07639	0.8375	3.30694	0.713956	1.54671	1.91234	NA	NA	NA	-0.00801423	0.98675	4.78942	4.8161	-0.93961	0.06915	9.23732
SPAC6F6.03c.1	SPAC6F6.03c.1_Intron1	I	2734927	2735331	-	404	975	897	795	819	2276	1872	1614	1	1	1	SPAC6F6.03c.1_Exon2	976	SPAC6F6.03c.1_Exon1	898	0.377856	0.314356	0.401639	0.38196	GTAAGT	6	9.48	TAG	404	5.14	38.8416	0.356436	4.05941	9.78381	8.14652	25.0953	6.77283	18.0935	20.2918	1.1	0.035	0.76	-1.60957	0.0007	2.29767	7.01156	-0.295649	0.55315	8.60625
SPAC6F6.07c.1	SPAC6F6.07c.1_Intron2	I	2746239	2746302	-	63	431	368	338	285	862	632	456	3	2	2	SPAC6F6.07c.1_Exon3	34	SPAC6F6.07c.1_Exon2	48	0.394432	0.380952	0.411765	0.5	GTATGC	6	7.58	TAG	63	5.14	49.6984	256.476	11.3968	106.441	602.559	1309.26	105.479	739.104	1856.81	NA	NA	NA	-0.648798	0.0573	4980.92	7809.39	3.82835	5e-05	549.755
SPAC6F6.07c.1	SPAC6F6.07c.1_Intron3	I	2746335	2746438	-	103	295	464	202	381	862	632	456	3	1	3	SPAC6F6.07c.1_Exon4	296	SPAC6F6.07c.1_Exon3	34	0.394432	0.242718	0.442568	0.411765	GTATGT	6	8.68	TAG	103	5.14	6.80583	1.28155	0.883495	37.8007	443.02	716.77	106.441	602.559	1309.26	NA	NA	NA	-0.648798	0.0573	4980.92	7809.39	3.82835	5e-05	549.755
SPAC6F6.07c.1	SPAC6F6.07c.1_Intron1	I	2746128	2746192	-	64	541	257	448	174	862	632	456	3	3	1	SPAC6F6.07c.1_Exon2	48	SPAC6F6.07c.1_Exon1	258	0.394432	0.328125	0.5	0.406977	GTGAGT	6	5.61	TAG	64	5.14	12.2031	3.48438	3.09375	105.479	739.104	1856.81	42.3953	405.868	1378.34	NA	NA	NA	-0.648798	0.0573	4980.92	7809.39	3.82835	5e-05	549.755
SPAC6F6.08c.1	SPAC6F6.08c.1_Intron1	I	2746931	2747118	-	187	1062	265	891	160	1514	1176	900	3	3	1	SPAC6F6.08c.1_Exon2	149	SPAC6F6.08c.1_Exon1	266	0.359974	0.245989	0.389262	0.394737	GTAAGT	6	9.48	AAG	187	3.03	0.946524	0.112299	0.0748663	2.28188	1.78523	5.31544	1.47744	2.57519	3.65038	42.265	558.76	764.595	0.217991	0.8787	9.77556	8.40465	-1.14814	0.2321	18.627
SPAC6F6.08c.1	SPAC6F6.08c.1_Intron3	I	2747431	2747508	-	77	672	765	501	660	1514	1176	900	3	1	3	SPAC6F6.08c.1_Exon4	673	SPAC6F6.08c.1_Exon3	92	0.359974	0.220779	0.398217	0.380435	GTAAGT	6	9.48	CAG	77	4.79	NA	NA	NA	2.08618	0.982169	3.33135	1.56522	1.6413	1.5	42.265	558.76	764.595	0.217991	0.8787	9.77556	8.40465	-1.14814	0.2321	18.627
SPAC6F6.08c.1	SPAC6F6.08c.1_Intron2	I	2747266	2747340	-	74	840	600	669	495	1514	1176	900	3	2	2	SPAC6F6.08c.1_Exon3	92	SPAC6F6.08c.1_Exon2	149	0.359974	0.256757	0.380435	0.389262	GTAAGT	6	9.48	TAG	74	5.14	0.986486	0.108108	0	1.56522	1.6413	1.5	2.28188	1.78523	5.31544	42.265	558.76	764.595	0.217991	0.8787	9.77556	8.40465	-1.14814	0.2321	18.627
SPAC6G10.06.1	SPAC6G10.06.1_Intron2	I	3227383	3227455	+	72	455	737	455	737	1264	1131	1131	2	2	1	SPAC6G10.06.1_Exon2	343	SPAC6G10.06.1_Exon3	738	0.371835	0.263889	0.373178	0.384824	GTAAGC	6	8.38	TAG	72	5.14	NA	NA	NA	NA	NA	NA	0.0474255	0.0189702	0.0758808	NA	NA	NA	-0.347994	0.1909	3.04395	3.87431	0.257998	0.32015	3.23988
SPAC6G10.06.1	SPAC6G10.06.1_Intron1	I	3226980	3227041	+	61	52	1151	52	1151	1264	1131	1131	2	1	2	SPAC6G10.06.1_Exon1	53	SPAC6G10.06.1_Exon2	343	0.371835	0.344262	0.396226	0.373178	GTAATT	6	4.16	TAG	61	5.14	NA	NA	NA	NA	NA	NA	NA	NA	NA	NA	NA	NA	-0.347994	0.1909	3.04395	3.87431	0.257998	0.32015	3.23988
SPAC6G10.07.1	SPAC6G10.07.1_Intron1	I	3228783	3228832	+	49	287	2566	251	2092	2902	2853	2343	1	1	1	SPAC6G10.07.1_Exon1	288	SPAC6G10.07.1_Exon2	2567	0.374569	0.285714	0.420139	0.37125	GTAAGT	6	9.48	TAG	49	5.14	0.77551	0	0	4.29861	1.22222	15.9306	4.45462	5.3954	11.4016	4.35	6.625	16.22	0.106595	0.68665	30.0198	27.8817	-0.647996	0.00555	43.6903
SPAC6G9.01c.1	SPAC6G9.01c.1_Intron1	I	3241570	3241654	-	84	778	453	678	8	1315	833	288	2	2	1	SPAC6G9.01c.1_Exon2	100	SPAC6G9.01c.1_Exon1	454	0.362738	0.285714	0.47	0.348018	GTAAGT	6	9.48	AAG	84	3.03	1.22619	0.154762	0.178571	2.41	22.78	26.57	1.31498	1.81057	0.788546	2.035	1.05	6.885	-1.06982	5e-05	28.0338	58.8477	1.91099	5e-05	15.6482
SPAC6G9.01c.1	SPAC6G9.01c.1_Intron2	I	3241753	3242151	-	398	281	636	181	191	1315	833	288	2	1	2	SPAC6G9.01c.1_Exon3	282	SPAC6G9.01c.1_Exon2	100	0.362738	0.351759	0.390071	0.47	GTAAGA	6	7.8	TAG	398	5.14	1.27638	0.258794	0.0653266	1.39362	11.6099	2.81915	2.41	22.78	26.57	2.035	1.05	6.885	-1.06982	5e-05	28.0338	58.8477	1.91099	5e-05	15.6482
SPAC6G9.07c.1	SPAC6G9.07c.1_Intron1	I	3258748	3258929	-	181	598	278	515	177	1057	691	507	3	3	1	SPAC6G9.07c.1_Exon2	125	SPAC6G9.07c.1_Exon1	279	0.352886	0.314917	0.384	0.322581	GTACGT	6	8.33	TAG	181	5.14	2.40331	0.342541	0	4.936	31.112	50.432	3.40143	26.6667	39.276	1.725	0.11	0.085	0.156674	0.2065	191.325	171.636	2.20322	5e-05	37.2714
SPAC6G9.07c.1	SPAC6G9.07c.1_Intron3	I	3259386	3259441	-	55	86	916	3	815	1057	691	507	3	1	3	SPAC6G9.07c.1_Exon4	87	SPAC6G9.07c.1_Exon3	204	0.352886	0.272727	0.413793	0.426471	GTAAGA	6	7.8	TAG	55	5.14	NA	NA	NA	NA	NA	NA	4.66667	28.4412	56.848	1.725	0.11	0.085	0.156674	0.2065	191.325	171.636	2.20322	5e-05	37.2714
SPAC6G9.07c.1	SPAC6G9.07c.1_Intron2	I	3259053	3259183	-	130	344	583	261	482	1057	691	507	3	2	2	SPAC6G9.07c.1_Exon3	204	SPAC6G9.07c.1_Exon2	125	0.352886	0.338462	0.426471	0.384	GTATGT	6	8.68	TAG	130	5.14	1.2	0.0769231	0.684615	4.66667	28.4412	56.848	4.936	31.112	50.432	1.725	0.11	0.085	0.156674	0.2065	191.325	171.636	2.20322	5e-05	37.2714
SPAC6G9.13c.1	SPAC6G9.13c.1_Intron1	I	3272265	3272416	-	151	283	190	283	116	624	473	399	1	1	1	SPAC6G9.13c.1_Exon2	284	SPAC6G9.13c.1_Exon1	191	0.3125	0.251656	0.323944	0.34555	GTAAGT	6	9.48	TAG	151	5.14	NA	NA	NA	0.485915	0.566901	0.880282	0.240838	0.26178	0.293194	NA	NA	NA	0.740276	0.03805	64.8995	38.8505	1.90196	0.00025	10.3956
SPAC750.06c.1	SPAC750.06c.1_Intron1	I	5569255	5569313	-	58	490	353	490	353	901	843	843	1	1	1	SPAC750.06c.1_Exon2	491	SPAC750.06c.1_Exon1	354	0.354051	0.206897	0.340122	0.398305	GTATGT	6	8.68	TAG	58	5.14	0.155172	0	0	0.293279	0.287169	0.710794	0.285311	0.437853	0.932203	NA	NA	NA	-0.319618	0.34745	1.93426	2.41396	-0.597396	0.05805	3.65228
SPAC767.01c.1	SPAC767.01c.1_Intron1	I	1999198	1999249	-	51	364	2425	93	1944	2840	2789	2037	1	1	1	SPAC767.01c.1_Exon2	365	SPAC767.01c.1_Exon1	2426	0.372887	0.215686	0.372603	0.376752	GTATGT	6	8.68	TAG	51	5.14	3.94118	0.0196078	1.31373	1.39452	0.331507	4.71233	5.15375	5.74402	17.1162	1.975	1.025	3.345	0.340965	0.1304	35.5429	28.0616	-0.603312	0.05435	42.6312
SPAC7D4.09c.1	SPAC7D4.09c.1_Intron1	I	2622420	2622471	+	51	61	1114	-194	1019	1226	1175	825	1	1	1	SPAC7D4.09c.1_Exon1	62	SPAC7D4.09c.1_Exon2	1115	0.340131	0.313725	0.258065	0.346188	GTATGA	6	7	CAG	51	4.79	NA	NA	NA	0.209677	0.854839	0.725806	0.299552	1.5157	2.40897	NA	NA	NA	0.0120708	0.9722	13.4598	13.3476	-0.651617	0.0366	20.9681
SPAC7D4.10.1	SPAC7D4.10.1_Intron2	I	2621519	2621661	-	142	654	1225	534	1225	2021	1473	1353	5	4	2	SPAC7D4.10.1_Exon3	65	SPAC7D4.10.1_Exon2	946	0.349332	0.288732	0.369231	0.376321	GTAAGT	6	9.48	TAG	142	5.14	NA	NA	NA	1.8	3.41538	21	2.84461	9.92495	25.0729	NA	NA	NA	0.000810828	0.99525	44.1152	44.0904	0.868313	5e-05	24.1521
SPAC7D4.10.1	SPAC7D4.10.1_Intron3	I	2621725	2621775	-	50	540	1431	420	1431	2021	1473	1353	5	3	3	SPAC7D4.10.1_Exon4	104	SPAC7D4.10.1_Exon3	65	0.349332	0.26	0.403846	0.369231	GTAAGG	6	7.57	AAG	50	3.03	1	0.1	0	3.51923	7.06731	10.2404	1.8	3.41538	21	NA	NA	NA	0.000810828	0.99525	44.1152	44.0904	0.868313	5e-05	24.1521
SPAC7D4.10.1	SPAC7D4.10.1_Intron5	I	2622120	2622168	-	48	147	1826	27	1826	2021	1473	1353	5	1	5	SPAC7D4.10.1_Exon6	148	SPAC7D4.10.1_Exon5	190	0.349332	0.395833	0.358108	0.415789	GTATGT	6	8.68	CAG	48	4.79	1.47917	0	0.708333	1.46622	2.17568	1.37838	3.18947	4.76842	18.5316	NA	NA	NA	0.000810828	0.99525	44.1152	44.0904	0.868313	5e-05	24.1521
SPAC7D4.10.1	SPAC7D4.10.1_Intron1	I	2620319	2620574	-	255	1741	25	1621	25	2021	1473	1353	5	5	1	SPAC7D4.10.1_Exon2	946	SPAC7D4.10.1_Exon1	26	0.349332	0.258824	0.376321	0.192308	GTAAGT	6	9.48	AAG	255	3.03	1.17255	6.79608	0.470588	2.84461	9.92495	25.0729	1.34615	0	0.0384615	NA	NA	NA	0.000810828	0.99525	44.1152	44.0904	0.868313	5e-05	24.1521
SPAC7D4.10.1	SPAC7D4.10.1_Intron4	I	2621878	2621931	-	53	384	1584	264	1584	2021	1473	1353	5	2	4	SPAC7D4.10.1_Exon5	190	SPAC7D4.10.1_Exon4	104	0.349332	0.245283	0.415789	0.403846	GTAAGT	6	9.48	AAG	53	3.03	0.716981	0.0377358	0.603774	3.18947	4.76842	18.5316	3.51923	7.06731	10.2404	NA	NA	NA	0.000810828	0.99525	44.1152	44.0904	0.868313	5e-05	24.1521
SPAC823.17.1	SPAC823.17.1_Intron1	I	2583902	2583940	+	38	40	293	40	107	371	333	147	1	1	1	SPAC823.17.1_Exon1	41	SPAC823.17.1_Exon2	294	0.32345	0.263158	0.341463	0.329932	GTATGT	6	8.68	TAG	38	5.14	0.947368	0.184211	0	0.487805	6.78049	3	4.92517	51.5612	41.9082	3.7	3.865	0.3	NA	NA	NA	NA	NA	NA	NA
SPAC890.08.1	SPAC890.08.1_Intron1	I	5018272	5018392	+	120	243	282	147	195	645	525	342	1	1	1	SPAC890.08.1_Exon1	244	SPAC890.08.1_Exon2	283	0.417054	0.266667	0.45082	0.45583	GTAAGT	6	9.48	TAG	120	5.14	3.66667	1.23333	0.183333	9.37705	325.02	940.717	15.6396	406.318	1008.54	NA	NA	NA	-0.828477	0.02375	7795.24	13842.9	6.25966	5e-05	180.668
SPAC8C9.11.1	SPAC8C9.11.1_Intron2	I	3659420	3659526	+	106	1031	298	289	45	1435	1250	255	2	2	1	SPAC8C9.11.1_Exon2	151	SPAC8C9.11.1_Exon3	299	0.349826	0.283019	0.456954	0.307692	GTTCGT	6	3.53	CAG	106	4.79	0.735849	0.141509	0	1.66887	10.5828	43.0596	1.44816	10.2007	6.08361	0.87	5.525	0.065	-0.756642	0.00015	24.7773	41.8626	1.84497	5e-05	11.6529
SPAC8C9.11.1	SPAC8C9.11.1_Intron1	I	3659191	3659270	+	79	802	554	60	301	1435	1250	255	2	1	2	SPAC8C9.11.1_Exon1	803	SPAC8C9.11.1_Exon2	151	0.349826	0.240506	0.366127	0.456954	GTACGT	6	8.33	TAG	79	5.14	0.658228	0.240506	0	0.125778	0.252802	1.36986	1.66887	10.5828	43.0596	0.87	5.525	0.065	-0.756642	0.00015	24.7773	41.8626	1.84497	5e-05	11.6529
SPAC8E11.03c.1	SPAC8E11.03c.1_Intron1	I	3382404	3382478	+	74	131	926	73	926	1131	1057	999	1	1	1	SPAC8E11.03c.1_Exon1	132	SPAC8E11.03c.1_Exon2	927	0.419982	0.324324	0.348485	0.437972	GTAAGC	6	8.38	AAG	74	3.03	NA	NA	NA	NA	NA	NA	0.0690399	0.0852211	0.326861	NA	NA	NA	0.467187	0.01375	11.4169	8.25867	-0.655124	0.00075	13.0054
SPAC8E11.06.1	SPAC8E11.06.1_Intron1	I	3377958	3378003	-	45	91	58	91	58	194	102	102	2	2	1	SPAC8E11.06.1_Exon2	19	SPAC8E11.06.1_Exon1	59	0.309278	0.311111	0.368421	0.305085	GTATGT	6	8.68	TAG	45	5.14	NA	NA	NA	NA	NA	NA	0.542373	0.694915	3.33898	1.035	0.58	0.25	0	1	0	0	0	1	0
SPAC8E11.06.1	SPAC8E11.06.1_Intron2	I	3378021	3378068	-	47	26	121	26	121	194	102	102	2	1	2	SPAC8E11.06.1_Exon3	27	SPAC8E11.06.1_Exon2	19	0.309278	0.255319	0.407407	0.368421	GTTGTT	6	-3.63	TAG	47	5.14	0.12766	0.12766	0.170213	0.037037	0.0740741	0.481481	NA	NA	NA	1.035	0.58	0.25	0	1	0	0	0	1	0
SPAC8F11.05c.1	SPAC8F11.05c.1_Intron1	I	2861354	2861417	-	63	398	506	323	403	967	904	726	1	1	1	SPAC8F11.05c.1_Exon2	399	SPAC8F11.05c.1_Exon1	507	0.365047	0.349206	0.353383	0.378698	GTAAGC	6	8.38	AAG	63	3.03	NA	NA	NA	0.0526316	0.085213	0.26817	0.00788955	0.167653	0.400394	NA	NA	NA	-1.21078	0.22515	3.55862	8.23688	-1.26547	0.11825	19.8019
SPAC959.05c.1	SPAC959.05c.1_Intron1	I	3397327	3397382	-	55	256	2111	256	1643	2422	2367	1899	1	1	1	SPAC959.05c.1_Exon2	257	SPAC959.05c.1_Exon1	2112	0.361272	0.2	0.346304	0.367424	GTATGG	6	6.77	TAG	55	5.14	NA	NA	NA	NA	NA	NA	1.69271	0.651515	0.0733902	NA	NA	NA	-0.741724	0.0775	2.43869	4.07791	-4.54399	0.0546	95.1293
SPAC977.06.1	SPAC977.06.1_Intron1	I	39848	39898	+	50	433	174	418	152	657	607	570	1	1	1	SPAC977.06.1_Exon1	434	SPAC977.06.1_Exon2	175	0.319635	0.24	0.308756	0.371429	GTATGT	6	8.68	TAG	50	5.14	NA	NA	NA	NA	NA	NA	NA	NA	NA	NA	NA	NA	Inf	1	0.162484	0	#NAME?	1	0.614931
SPAC9E9.01.1	SPAC9E9.01.1_Intron1	I	4434897	4434938	+	41	37	571	37	263	649	608	300	1	1	1	SPAC9E9.01.1_Exon1	38	SPAC9E9.01.1_Exon2	572	0.379045	0.439024	0.552632	0.365385	GTACGC	6	7.24	AAG	41	3.03	NA	NA	NA	NA	NA	NA	0.0034965	0.251748	0.0472028	NA	NA	NA	-0.0748123	0.89945	1.2626	1.3298	-1.23446	0.03295	3.12892
SPAC9E9.17c.1	SPAC9E9.17c.1_Intron2	I	4437648	4437731	-	83	131	338	131	338	552	219	219	3	2	2	SPAC9E9.17c.1_Exon3	83	SPAC9E9.17c.1_Exon2	44	0.346014	0.349398	0.445783	0.318182	GTATGA	6	7	TAG	83	5.14	NA	NA	NA	NA	NA	NA	NA	NA	NA	NA	NA	NA	#NAME?	1	0	0.829216	Inf	1	0
SPAC9E9.17c.1	SPAC9E9.17c.1_Intron1	I	4437401	4437605	-	204	257	91	257	91	552	219	219	3	3	1	SPAC9E9.17c.1_Exon2	44	SPAC9E9.17c.1_Exon1	92	0.346014	0.352941	0.318182	0.282609	GTATGA	6	7	TAG	204	5.14	NA	NA	NA	NA	NA	NA	0.0217391	0.108696	1.45652	NA	NA	NA	#NAME?	1	0	0.829216	Inf	1	0
SPAC9E9.17c.1	SPAC9E9.17c.1_Intron3	I	4437813	4437859	-	46	3	503	3	503	552	219	219	3	1	3	SPAC9E9.17c.1_Exon4	4	SPAC9E9.17c.1_Exon3	83	0.346014	0.326087	0.25	0.445783	GTAAGC	6	8.38	TAG	46	5.14	NA	NA	NA	NA	NA	NA	NA	NA	NA	NA	NA	NA	#NAME?	1	0	0.829216	Inf	1	0
SPAC9G1.09.1	SPAC9G1.09.1_Intron1	I	1985873	1985929	+	56	212	5305	117	1299	5573	5517	1416	1	1	1	SPAC9G1.09.1_Exon1	213	SPAC9G1.09.1_Exon2	5306	0.38848	0.267857	0.399061	0.389559	GTAAGA	6	7.8	CAG	56	4.79	NA	NA	NA	0.43662	0.15493	0.85446	0.266302	0.290049	0.450245	NA	NA	NA	-0.292905	0.5854	0.794634	0.97351	-1.07813	0.02375	2.05537
SPAC9G1.13c.1	SPAC9G1.13c.1_Intron2	I	1996268	1996324	-	56	534	1139	359	1061	1729	1567	1314	3	2	2	SPAC9G1.13c.1_Exon3	90	SPAC9G1.13c.1_Exon2	79	0.362059	0.303571	0.433333	0.303797	GTATGT	6	8.68	TAG	56	5.14	1.96429	0	0	2.52222	1.81111	11.4778	4.18987	4.46835	11.5823	NA	NA	NA	-0.224095	0.5732	15.5759	18.1934	-0.55167	0.28515	26.6675
SPAC9G1.13c.1	SPAC9G1.13c.1_Intron1	I	1996148	1996190	-	42	668	1019	493	941	1729	1567	1314	3	3	1	SPAC9G1.13c.1_Exon2	79	SPAC9G1.13c.1_Exon1	1020	0.362059	0.261905	0.303797	0.381373	GTTGAG	6	-5.15	TAG	42	5.14	NA	NA	NA	4.18987	4.46835	11.5823	2.40882	3.49608	6.92353	NA	NA	NA	-0.224095	0.5732	15.5759	18.1934	-0.55167	0.28515	26.6675
SPAC9G1.13c.1	SPAC9G1.13c.1_Intron3	I	1996413	1996477	-	64	381	1284	206	1206	1729	1567	1314	3	1	3	SPAC9G1.13c.1_Exon4	382	SPAC9G1.13c.1_Exon3	90	0.362059	0.265625	0.34555	0.433333	GTGAGT	6	5.61	TAG	64	5.14	2.40625	0.359375	0	2.15969	1.1623	5.26178	2.52222	1.81111	11.4778	NA	NA	NA	-0.224095	0.5732	15.5759	18.1934	-0.55167	0.28515	26.6675
SPACUNK4.10.1	SPACUNK4.10.1_Intron2	I	2892175	2892431	-	256	372	1127	96	960	1755	1448	1005	2	1	2	SPACUNK4.10.1_Exon3	373	SPACUNK4.10.1_Exon2	867	0.415385	0.429688	0.391421	0.454441	GTAAAG	6	2.64	TAG	256	5.14	1.61328	0.238281	0.0078125	4.60858	7.8874	13.0777	3.24913	12.3299	56.1499	NA	NA	NA	1.38568	0.00175	127.141	48.6582	1.17765	0.12945	21.5103
SPACUNK4.10.1	SPACUNK4.10.1_Intron1	I	2891258	2891309	-	51	1494	210	1218	43	1755	1448	1005	2	2	1	SPACUNK4.10.1_Exon2	867	SPACUNK4.10.1_Exon1	211	0.415385	0.294118	0.454441	0.312796	GTAAGT	6	9.48	TAG	51	5.14	0.509804	0	0	3.24913	12.3299	56.1499	1.77725	9.45024	15.1137	NA	NA	NA	1.38568	0.00175	127.141	48.6582	1.17765	0.12945	21.5103
SPACUNK4.11c.1	SPACUNK4.11c.1_Intron1	I	2890184	2890239	+	55	90	648	27	540	793	738	567	1	1	1	SPACUNK4.11c.1_Exon1	91	SPACUNK4.11c.1_Exon2	649	0.337957	0.236364	0.208791	0.365177	GTACGA	6	6.65	TAG	55	5.14	0.454545	0.0909091	0	0.351648	2.05495	0.384615	0.548536	6.22496	6.88444	NA	NA	NA	-0.72561	0.01215	19.1094	31.5993	1.82138	5e-05	8.94103
SPACUNK4.13c.1	SPACUNK4.13c.1_Intron1	I	2885526	2885591	+	65	305	1191	185	1130	1561	1405	1224	2	1	2	SPACUNK4.13c.1_Exon1	306	SPACUNK4.13c.1_Exon2	42	0.361947	0.292308	0.352941	0.380952	GTACGT	6	8.33	TAG	65	5.14	0.0923077	0.0307692	0.184615	0.45098	0.480392	2.00654	0.619048	0.5	0.285714	NA	NA	NA	0.29711	1	0.757711	0.616687	-1.38662	0.05225	1.61242
SPACUNK4.13c.1	SPACUNK4.13c.1_Intron2	I	2885632	2885723	+	91	411	1059	291	998	1561	1405	1224	2	2	1	SPACUNK4.13c.1_Exon2	42	SPACUNK4.13c.1_Exon3	1060	0.361947	0.21978	0.380952	0.382075	GTACGT	6	8.33	AAG	91	3.03	0.10989	0	0.56044	0.619048	0.5	0.285714	0.466038	1.60755	1.47547	NA	NA	NA	0.29711	1	0.757711	0.616687	-1.38662	0.05225	1.61242
SPAP27G11.04c.1	SPAP27G11.04c.1_Intron1	I	1615336	1615379	-	43	246	1096	112	836	1385	1342	948	1	1	1	SPAP27G11.04c.1_Exon2	247	SPAP27G11.04c.1_Exon1	1097	0.344404	0.372093	0.283401	0.357338	GTATGT	6	8.68	AAG	43	3.03	NA	NA	NA	0.336032	0.898785	0.206478	0.793984	5.24613	5.5278	NA	NA	NA	-0.626584	0.00025	16.78	25.9068	1.05965	5e-05	12.4287
SPAP27G11.06c.1	SPAP27G11.06c.1_Intron1	I	1619727	1619784	-	57	649	245	347	195	951	841	489	2	2	1	SPAP27G11.06c.1_Exon2	132	SPAP27G11.06c.1_Exon1	246	0.356467	0.368421	0.310606	0.402439	GTACGG	6	6.42	TAG	57	5.14	0.701754	0.22807	0	1.77273	3.01515	20.0455	2.71545	8.95935	12.7358	1.58	5.17	1.07	-0.0766935	0.62245	52.3997	55.2607	0.724162	0.0001	33.452
SPAP27G11.06c.1	SPAP27G11.06c.1_Intron2	I	1619915	1619968	-	53	465	433	163	383	951	841	489	2	1	2	SPAP27G11.06c.1_Exon3	466	SPAP27G11.06c.1_Exon2	132	0.356467	0.188679	0.364807	0.310606	GTAAAA	6	2.87	TAG	53	5.14	NA	NA	NA	3.04936	7.76395	6.19528	1.77273	3.01515	20.0455	1.58	5.17	1.07	-0.0766935	0.62245	52.3997	55.2607	0.724162	0.0001	33.452
SPAP27G11.07c.1	SPAP27G11.07c.1_Intron1	I	1620608	1620656	-	48	702	241	606	111	991	943	717	1	1	1	SPAP27G11.07c.1_Exon2	703	SPAP27G11.07c.1_Exon1	242	0.35116	0.270833	0.361309	0.338843	GTATGT	6	8.68	AAG	48	3.03	0.625	0	0	1.67568	1.98009	8.35135	1.95041	3.60331	5.69421	2.84	7.425	2.405	-0.105585	0.88835	2.29536	2.46965	0.487574	0.50275	1.76141
SPAP27G11.08c.1	SPAP27G11.08c.1_Intron1	I	1622195	1622245	-	50	622	557	622	557	1229	1179	1179	1	1	1	SPAP27G11.08c.1_Exon2	623	SPAP27G11.08c.1_Exon1	558	0.336046	0.3	0.34992	0.324373	GTATGT	6	8.68	TAG	50	5.14	NA	NA	NA	0.792937	0.0577849	0.213483	0.494624	0.0448029	0.405018	NA	NA	NA	-0.519693	0.1287	1.09874	1.57521	-2.84758	5e-05	11.3383
SPAP27G11.11c.1	SPAP27G11.11c.1_Intron1	I	1631098	1631180	-	82	23	199	23	199	304	222	222	1	1	1	SPAP27G11.11c.1_Exon2	24	SPAP27G11.11c.1_Exon1	200	0.325658	0.317073	0.375	0.325	GTATAT	6	3.74	TAG	82	5.14	NA	NA	NA	NA	NA	NA	NA	NA	NA	NA	NA	NA	0	1	0	0	#NAME?	0.15145	23.0591
SPAP27G11.12.1	SPAP27G11.12.1_Intron1	I	1632087	1632166	+	79	20	2666	20	2576	2765	2484	2394	3	1	3	SPAP27G11.12.1_Exon1	21	SPAP27G11.12.1_Exon2	44	0.372152	0.341772	0.428571	0.454545	GTATGT	6	8.68	CAG	79	4.79	2.5443	0.0886076	0.240506	6.28571	0.904762	1.38095	8.11364	1.02273	0.0454545	NA	NA	NA	0.000800584	0.9941	19.0777	19.0671	-1.7961	5e-05	66.2162
SPAP27G11.12.1	SPAP27G11.12.1_Intron3	I	1632394	1632444	+	50	327	2388	327	2298	2765	2484	2394	3	3	1	SPAP27G11.12.1_Exon3	34	SPAP27G11.12.1_Exon4	2389	0.372152	0.26	0.382353	0.379657	GTAAGT	6	9.48	TAG	50	5.14	NA	NA	NA	6.94118	0.823529	0.235294	6.5676	3.66722	1.3964	NA	NA	NA	0.000800584	0.9941	19.0777	19.0671	-1.7961	5e-05	66.2162
SPAP27G11.12.1	SPAP27G11.12.1_Intron2	I	1632209	1632361	+	152	142	2471	142	2381	2765	2484	2394	3	2	2	SPAP27G11.12.1_Exon2	44	SPAP27G11.12.1_Exon3	34	0.372152	0.282895	0.454545	0.382353	GTAGGT	6	6.49	CAG	152	4.79	0.993421	0.0263158	0.118421	8.11364	1.02273	0.0454545	6.94118	0.823529	0.235294	NA	NA	NA	0.000800584	0.9941	19.0777	19.0671	-1.7961	5e-05	66.2162
SPAP7G5.03.1	SPAP7G5.03.1_Intron1	I	3738464	3738504	+	40	1940	5075	1510	602	7055	7015	2112	1	1	1	SPAP7G5.03.1_Exon1	1941	SPAP7G5.03.1_Exon2	5076	0.380581	0.25	0.353426	0.392041	GTTTGT	6	3.87	TAG	40	5.14	NA	NA	NA	2.40392	0.244204	12.2184	1.0725	0.197794	0.0500394	NA	NA	NA	-0.221218	0.7528	1.98564	2.31469	-1.99762	0.0009	9.24353
SPAPB17E12.09.1	SPAPB17E12.09.1_Intron1	I	1281060	1281106	+	46	524	305	360	252	875	829	612	1	1	1	SPAPB17E12.09.1_Exon1	525	SPAPB17E12.09.1_Exon2	306	0.315429	0.326087	0.299048	0.346405	GTATGA	6	7	TAG	46	5.14	NA	NA	NA	0.598095	0.0971429	0.047619	NA	NA	NA	NA	NA	NA	-0.393436	0.20335	4.16045	5.46482	-1.12056	5e-05	11.8823
SPAPB18E9.01.1	SPAPB18E9.01.1_Intron1	I	3974485	3974540	+	55	176	1725	176	1539	1956	1539	1353	7	1	7	SPAPB18E9.01.1_Exon1	177	SPAPB18E9.01.1_Exon2	90	0.334867	0.218182	0.288136	0.377778	GTATGC	6	7.58	TAG	55	5.14	0.490909	0.0545455	0	0.666667	1.29944	6.11299	2.61111	4.62222	8.8	NA	NA	NA	-0.398233	0.288	8.22186	10.8355	1.36918	0.1909	4.19455
SPAPB18E9.01.1	SPAPB18E9.01.1_Intron3	I	3974775	3974878	+	103	466	1387	466	1201	1956	1539	1353	7	3	5	SPAPB18E9.01.1_Exon3	103	SPAPB18E9.01.1_Exon4	255	0.334867	0.320388	0.368932	0.376471	GTAGGA	6	4.81	TAG	103	5.14	1.14563	0.252427	0	2.05825	3.78641	23.2913	1.89412	4.79608	11.3529	NA	NA	NA	-0.398233	0.288	8.22186	10.8355	1.36918	0.1909	4.19455
SPAPB18E9.01.1	SPAPB18E9.01.1_Intron4	I	3975132	3975192	+	60	823	1073	823	887	1956	1539	1353	7	4	4	SPAPB18E9.01.1_Exon4	255	SPAPB18E9.01.1_Exon5	238	0.334867	0.3	0.376471	0.394958	GTATGG	6	6.77	TAG	60	5.14	0.566667	0	0	1.89412	4.79608	11.3529	1.77311	4.65126	9.20168	NA	NA	NA	-0.398233	0.288	8.22186	10.8355	1.36918	0.1909	4.19455
SPAPB18E9.01.1	SPAPB18E9.01.1_Intron5	I	3975429	3975484	+	55	1120	781	1120	595	1956	1539	1353	7	5	3	SPAPB18E9.01.1_Exon5	238	SPAPB18E9.01.1_Exon6	349	0.334867	0.345455	0.394958	0.366762	GTATAA	6	2.07	AAG	55	3.03	0.581818	0.127273	0	1.77311	4.65126	9.20168	1.48711	7.95989	6.23496	NA	NA	NA	-0.398233	0.288	8.22186	10.8355	1.36918	0.1909	4.19455
SPAPB18E9.01.1	SPAPB18E9.01.1_Intron7	I	3975962	3976013	+	51	1653	252	1653	66	1956	1539	1353	7	7	1	SPAPB18E9.01.1_Exon7	82	SPAPB18E9.01.1_Exon8	253	0.334867	0.254902	0.426829	0.27668	GTAATA	6	2.48	TAG	51	5.14	0.215686	0.490196	0	0.926829	10.7317	7.68293	0.474308	3.02767	3.04348	NA	NA	NA	-0.398233	0.288	8.22186	10.8355	1.36918	0.1909	4.19455
SPAPB18E9.01.1	SPAPB18E9.01.1_Intron6	I	3975832	3975881	+	49	1523	384	1523	198	1956	1539	1353	7	6	2	SPAPB18E9.01.1_Exon6	349	SPAPB18E9.01.1_Exon7	82	0.334867	0.22449	0.366762	0.426829	GTATGA	6	7	TAG	49	5.14	0.367347	0.306122	0	1.48711	7.95989	6.23496	0.926829	10.7317	7.68293	NA	NA	NA	-0.398233	0.288	8.22186	10.8355	1.36918	0.1909	4.19455
SPAPB18E9.01.1	SPAPB18E9.01.1_Intron2	I	3974629	3974673	+	44	320	1592	320	1406	1956	1539	1353	7	2	6	SPAPB18E9.01.1_Exon2	90	SPAPB18E9.01.1_Exon3	103	0.334867	0.227273	0.377778	0.368932	GTAAAG	6	2.64	AAG	44	3.03	0.977273	0.0909091	0	2.61111	4.62222	8.8	2.05825	3.78641	23.2913	NA	NA	NA	-0.398233	0.288	8.22186	10.8355	1.36918	0.1909	4.19455
SPAPB1A10.03.1	SPAPB1A10.03.1_Intron1	I	1863381	1863433	+	52	19	329	19	329	400	348	348	1	1	1	SPAPB1A10.03.1_Exon1	20	SPAPB1A10.03.1_Exon2	330	0.3375	0.269231	0.4	0.348485	GTATGT	6	8.68	AAG	52	3.03	0.403846	0	0	0.7	0.55	13.2	2.01212	1.37273	14.3121	2.23	3.635	3.205	-0.131314	0.66135	10.0153	10.9697	-1.72432	5e-05	36.2466
SPAPB1A10.16.1	SPAPB1A10.16.1_Intron1	I	1864360	1864414	+	54	389	43	389	43	486	432	432	1	1	1	SPAPB1A10.16.1_Exon1	390	SPAPB1A10.16.1_Exon2	44	0.37037	0.296296	0.392308	0.272727	GTATGT	6	8.68	TAG	54	5.14	0.888889	0	0	2.83333	9.23846	25.5128	2.97727	15.5909	12.1591	2.515	10.03	0.7	-0.0963348	0.51305	82.2394	87.9184	1.06152	5e-05	42.1242
SPAPB1A11.02.1	SPAPB1A11.02.1_Intron1	I	2980532	2980629	+	97	105	1210	60	960	1412	1315	1020	1	1	1	SPAPB1A11.02.1_Exon1	106	SPAPB1A11.02.1_Exon2	1211	0.394476	0.360825	0.320755	0.403799	GTGAGT	6	5.61	CAG	97	4.79	NA	NA	NA	NA	NA	NA	0.045417	0.0289017	0.017341	NA	NA	NA	-0.766659	1	0.127166	0.216351	-2.04694	0.00835	0.894025
SPAPB1E7.02c.1	SPAPB1E7.02c.1_Intron2	I	3285508	3285553	-	45	225	2505	192	2314	2775	2672	2448	2	1	2	SPAPB1E7.02c.1_Exon3	226	SPAPB1E7.02c.1_Exon2	153	0.388468	0.333333	0.420354	0.424837	GTAAGT	6	9.48	TAG	45	5.14	0.8	0	0	0.995575	0.314159	4.45133	3.02614	1.22222	7.11765	NA	NA	NA	0.0868919	0.65995	11.685	11.002	-1.04274	5e-05	22.6656
SPAPB1E7.02c.1	SPAPB1E7.02c.1_Intron1	I	3285298	3285356	-	58	422	2295	389	2104	2775	2672	2448	2	2	1	SPAPB1E7.02c.1_Exon2	153	SPAPB1E7.02c.1_Exon1	2296	0.388468	0.310345	0.424837	0.38676	GTAAGT	6	9.48	TAG	58	5.14	1.15517	0	0	3.02614	1.22222	7.11765	2.348	2.27003	4.1899	NA	NA	NA	0.0868919	0.65995	11.685	11.002	-1.04274	5e-05	22.6656
SPAPB1E7.06c.1	SPAPB1E7.06c.1_Intron1	I	3299548	3299632	-	84	484	3215	235	2029	3783	3643	2208	2	2	1	SPAPB1E7.06c.1_Exon2	93	SPAPB1E7.06c.1_Exon1	3216	0.381443	0.416667	0.344086	0.382463	GTAAGT	6	9.48	CAG	84	4.79	NA	NA	NA	2.15054	0.129032	1.64516	2.41542	0.232898	0.472015	NA	NA	NA	0.331312	0.11385	6.66669	5.29877	-2.18452	5e-05	24.0869
SPAPB1E7.06c.1	SPAPB1E7.06c.1_Intron2	I	3299724	3299780	-	56	336	3391	87	2205	3783	3643	2208	2	1	2	SPAPB1E7.06c.1_Exon3	337	SPAPB1E7.06c.1_Exon2	93	0.381443	0.357143	0.382789	0.344086	GTTTGT	6	3.87	TAG	56	5.14	0.607143	0	0	0.525223	0.0178042	0.5727	2.15054	0.129032	1.64516	NA	NA	NA	0.331312	0.11385	6.66669	5.29877	-2.18452	5e-05	24.0869
SPAPB8E5.02c.1	SPAPB8E5.02c.1_Intron1	I	4910744	4910791	-	47	309	1378	84	1248	1734	1687	1332	1	1	1	SPAPB8E5.02c.1_Exon2	310	SPAPB8E5.02c.1_Exon1	1379	0.365052	0.255319	0.364516	0.369108	GTACGT	6	8.33	TAG	47	5.14	1.53191	0.0851064	0	0.641935	1.50323	4.72903	4.82161	20.4351	42.0305	NA	NA	NA	0.0897597	0.48205	118.05	110.929	1.20535	5e-05	48.1059
SPAPB8E5.05.1	SPAPB8E5.05.1_Intron2	I	4917214	4917285	+	71	612	236	116	13	919	769	129	2	2	1	SPAPB8E5.05.1_Exon2	295	SPAPB8E5.05.1_Exon3	237	0.346028	0.309859	0.379661	0.308017	GTAAGT	6	9.48	TAG	71	5.14	NA	NA	NA	0.00677966	0.135593	0.233898	0.00843882	0.198312	0.0337553	NA	NA	NA	-2.07094	0.00645	0.470816	1.97818	-3.4141	5e-05	21.0869
SPAPB8E5.05.1	SPAPB8E5.05.1_Intron1	I	4916841	4916920	+	79	239	601	-178	378	919	769	129	2	1	2	SPAPB8E5.05.1_Exon1	240	SPAPB8E5.05.1_Exon2	295	0.346028	0.35443	0.354167	0.379661	GTATCT	6	2.41	TAG	79	5.14	NA	NA	NA	NA	NA	NA	0.00677966	0.135593	0.233898	NA	NA	NA	-2.07094	0.00645	0.470816	1.97818	-3.4141	5e-05	21.0869
SPAPYUG7.04c.1	SPAPYUG7.04c.1_Intron1	I	4751734	4751809	-	75	712	345	523	51	1132	825	342	4	4	1	SPAPYUG7.04c.1_Exon2	134	SPAPYUG7.04c.1_Exon1	346	0.360424	0.24	0.462687	0.407514	GTGTGT	6	4.81	TAG	75	5.14	1.02667	0	0	7.35075	1.67164	25.4627	5.71965	1.55491	6.04335	10.38	3.54	17.905	0.0675689	0.93615	9.75802	9.31154	-2.223	0.0015	43.4722
SPAPYUG7.04c.1	SPAPYUG7.04c.1_Intron4	I	4752224	4752291	-	67	230	835	41	541	1132	825	342	4	1	4	SPAPYUG7.04c.1_Exon5	231	SPAPYUG7.04c.1_Exon4	68	0.360424	0.283582	0.311688	0.455882	GTACGG	6	6.42	TAG	67	5.14	3.65672	0.19403	0.253731	1.02165	0.398268	2.78355	4.14706	0.882353	32.9559	10.38	3.54	17.905	0.0675689	0.93615	9.75802	9.31154	-2.223	0.0015	43.4722
SPAPYUG7.04c.1	SPAPYUG7.04c.1_Intron2	I	4751942	4751984	-	42	537	553	348	259	1132	825	342	4	3	2	SPAPYUG7.04c.1_Exon3	51	SPAPYUG7.04c.1_Exon2	134	0.360424	0.285714	0.411765	0.462687	GTAAGT	6	9.48	TAG	42	5.14	1.90476	0.0238095	0.452381	6.78431	1.11765	14.7647	7.35075	1.67164	25.4627	10.38	3.54	17.905	0.0675689	0.93615	9.75802	9.31154	-2.223	0.0015	43.4722
SPAPYUG7.04c.1	SPAPYUG7.04c.1_Intron3	I	4752034	4752157	-	123	364	645	175	351	1132	825	342	4	2	3	SPAPYUG7.04c.1_Exon4	68	SPAPYUG7.04c.1_Exon3	51	0.360424	0.292683	0.455882	0.411765	GTAAGC	6	8.38	TAG	123	5.14	2.09756	0.0569106	0.325203	4.14706	0.882353	32.9559	6.78431	1.11765	14.7647	10.38	3.54	17.905	0.0675689	0.93615	9.75802	9.31154	-2.223	0.0015	43.4722
SPATRNALYS.04.1	SPATRNALYS.04.1_Intron1	I	2684718	2684726	-	8	39	36	39	36	83	75	75	1	1	1	SPATRNALYS.04.1_Exon2	40	SPATRNALYS.04.1_Exon1	37	0.53012	NA	0.525	0.567568	NA	NA	NA	NA	NA	NA	NA	NA	NA	NA	NA	NA	NA	NA	NA	0.215	0.045	3.025	0	1	0	0	0	1	0
SPATRNASER.03.1	SPATRNASER.03.1_Intron1	I	4265185	4265200	+	15	37	45	37	45	97	82	82	1	1	1	SPATRNASER.03.1_Exon1	38	SPATRNASER.03.1_Exon2	46	0.484536	NA	0.421053	0.565217	NA	NA	NA	NA	NA	NA	NA	NA	NA	NA	NA	NA	7.26087	0.0434783	64.0435	3.96	0.03	14.325	0	1	0	0	#NAME?	0.0007	322.696
SPBC106.12c.1	SPBC106.12c.1_Intron2	II	401910	402016	-	106	498	957	333	746	1561	1201	825	4	3	2	SPBC106.12c.1_Exon3	126	SPBC106.12c.1_Exon2	68	0.370275	0.264151	0.468254	0.367647	GTATGT	6	8.68	TAG	106	5.14	0.915094	0	0.216981	2.48413	4.27778	8.25397	1.04412	1.61765	1.39706	2.555	1.455	1.19	-0.517227	0.2692	12.2999	17.6036	0.54672	0.29805	12.051
SPBC106.12c.1	SPBC106.12c.1_Intron3	II	402141	402194	-	53	320	1188	155	977	1561	1201	825	4	2	3	SPBC106.12c.1_Exon4	70	SPBC106.12c.1_Exon3	126	0.370275	0.226415	0.428571	0.468254	GTATGC	6	7.58	AAG	53	3.03	0.867925	0	0	0.885714	2.11429	5.88571	2.48413	4.27778	8.25397	2.555	1.455	1.19	-0.517227	0.2692	12.2999	17.6036	0.54672	0.29805	12.051
SPBC106.12c.1	SPBC106.12c.1_Intron4	II	402263	402304	-	41	210	1310	45	1099	1561	1201	825	4	1	4	SPBC106.12c.1_Exon5	211	SPBC106.12c.1_Exon4	70	0.370275	0.195122	0.345972	0.428571	GTAAAT	6	4.54	TAG	41	5.14	0.268293	0	0	0.123223	0.0947867	0.0663507	0.885714	2.11429	5.88571	2.555	1.455	1.19	-0.517227	0.2692	12.2999	17.6036	0.54672	0.29805	12.051
SPBC106.12c.1	SPBC106.12c.1_Intron1	II	401683	401843	-	160	671	730	506	519	1561	1201	825	4	4	1	SPBC106.12c.1_Exon2	68	SPBC106.12c.1_Exon1	731	0.370275	0.31875	0.367647	0.406293	GTAAGT	6	9.48	AAG	160	3.03	0.475	0.04375	0	1.04412	1.61765	1.39706	1.5554	4.41313	4.09986	2.555	1.455	1.19	-0.517227	0.2692	12.2999	17.6036	0.54672	0.29805	12.051
SPBC119.01.1	SPBC119.01.1_Intron1	II	712530	712576	+	46	107	1576	19	1519	1729	1639	1494	2	1	2	SPBC119.01.1_Exon1	108	SPBC119.01.1_Exon2	97	0.383459	0.23913	0.444444	0.360825	GTTTGT	6	3.87	AAG	46	3.03	0.673913	0	0	1.17593	0.037037	8.00926	3.78351	5.16495	19.9588	NA	NA	NA	0.2109	0.20485	80.0694	69.1798	0.604638	0.08235	45.4951
SPBC119.01.1	SPBC119.01.1_Intron2	II	712672	712716	+	44	249	1436	161	1379	1729	1639	1494	2	2	1	SPBC119.01.1_Exon2	97	SPBC119.01.1_Exon3	1437	0.383459	0.295455	0.360825	0.388309	GTGAGT	6	5.61	CAG	44	4.79	2.68182	0.0909091	0.318182	3.78351	5.16495	19.9588	4.83786	12.572	43.5268	NA	NA	NA	0.2109	0.20485	80.0694	69.1798	0.604638	0.08235	45.4951
SPBC119.14.1	SPBC119.14.1_Intron2	II	746447	746600	+	153	413	1134	413	956	1700	1294	1116	5	2	4	SPBC119.14.1_Exon2	85	SPBC119.14.1_Exon3	181	0.356471	0.287582	0.376471	0.40884	GTAAAC	6	3.45	TAG	153	5.14	NA	NA	NA	NA	NA	NA	NA	NA	NA	0.255	0.295	1.555	-0.855718	0.73525	0.876046	1.58534	0.187658	0.8923	1.39198
SPBC119.14.1	SPBC119.14.1_Intron3	II	746780	746838	+	58	746	896	746	718	1700	1294	1116	5	3	3	SPBC119.14.1_Exon3	181	SPBC119.14.1_Exon4	254	0.356471	0.224138	0.40884	0.397638	GTAATA	6	2.48	TAG	58	5.14	NA	NA	NA	NA	NA	NA	NA	NA	NA	0.255	0.295	1.555	-0.855718	0.73525	0.876046	1.58534	0.187658	0.8923	1.39198
SPBC119.14.1	SPBC119.14.1_Intron5	II	747222	747267	+	45	1188	467	1188	289	1700	1294	1116	5	5	1	SPBC119.14.1_Exon5	80	SPBC119.14.1_Exon6	468	0.356471	0.466667	0.5125	0.331197	GTAAGA	6	7.8	TAG	45	5.14	NA	NA	NA	0.0125	0.1125	1.3625	0.0854701	0.318376	0.258547	0.255	0.295	1.555	-0.855718	0.73525	0.876046	1.58534	0.187658	0.8923	1.39198
SPBC119.14.1	SPBC119.14.1_Intron1	II	746265	746363	+	98	231	1371	231	1193	1700	1294	1116	5	1	5	SPBC119.14.1_Exon1	232	SPBC119.14.1_Exon2	85	0.356471	0.244898	0.422414	0.376471	GTAAGT	6	9.48	AAG	98	3.03	NA	NA	NA	NA	NA	NA	NA	NA	NA	0.255	0.295	1.555	-0.855718	0.73525	0.876046	1.58534	0.187658	0.8923	1.39198
SPBC119.14.1	SPBC119.14.1_Intron4	II	747091	747143	+	52	1057	591	1057	413	1700	1294	1116	5	4	2	SPBC119.14.1_Exon4	254	SPBC119.14.1_Exon5	80	0.356471	0.153846	0.397638	0.5125	GTATAA	6	2.07	TAG	52	5.14	NA	NA	NA	NA	NA	NA	0.0125	0.1125	1.3625	0.255	0.295	1.555	-0.855718	0.73525	0.876046	1.58534	0.187658	0.8923	1.39198
SPBC1198.07c.1	SPBC1198.07c.1_Intron1	II	186535	186593	-	58	193	1945	82	1247	2196	2138	1329	1	1	1	SPBC1198.07c.1_Exon2	194	SPBC1198.07c.1_Exon1	1946	0.355647	0.344828	0.273196	0.364337	GTAAGT	6	9.48	AAG	58	3.03	0.982759	0	0	1.20619	0.412371	4.47423	1.7184	1.57246	6.13669	2.66	0.975	1.32	-0.0980876	0.9373	1.22589	1.31214	-0.971028	0.4501	2.5721
SPBC1198.10c.1	SPBC1198.10c.1_Intron2	II	191414	191488	-	74	330	2626	188	1208	3030	2886	1326	2	1	2	SPBC1198.10c.1_Exon3	331	SPBC1198.10c.1_Exon2	128	0.362046	0.256757	0.344411	0.382812	GTATGG	6	6.77	AAG	74	3.03	NA	NA	NA	1.79758	0.833837	4.05438	2.10938	0.539062	1.59375	NA	NA	NA	-0.0383653	0.9553	9.23369	9.48253	0.368906	0.4914	7.34299
SPBC1198.10c.1	SPBC1198.10c.1_Intron1	II	191217	191287	-	70	531	2429	389	1011	3030	2886	1326	2	2	1	SPBC1198.10c.1_Exon2	128	SPBC1198.10c.1_Exon1	2430	0.362046	0.314286	0.382812	0.368724	GTATGT	6	8.68	TAG	70	5.14	1.08571	0.0285714	0	2.10938	0.539062	1.59375	0.896296	0.665432	0.86214	NA	NA	NA	-0.0383653	0.9553	9.23369	9.48253	0.368906	0.4914	7.34299
SPBC1198.11c.1	SPBC1198.11c.1_Intron2	II	192524	192565	-	41	1285	773	977	589	2099	1888	1515	3	2	2	SPBC1198.11c.1_Exon3	1126	SPBC1198.11c.1_Exon2	328	0.357313	0.195122	0.373002	0.402439	GTATGT	6	8.68	TAG	41	5.14	NA	NA	NA	2.30639	2.93162	8.81616	1.49085	2.82622	5.42378	1.95	0.72	3	0.163783	0.76005	21.5901	19.2731	-0.0954289	0.82425	20.591
SPBC1198.11c.1	SPBC1198.11c.1_Intron1	II	192146	192197	-	51	1653	395	1345	211	2099	1888	1515	3	3	1	SPBC1198.11c.1_Exon2	328	SPBC1198.11c.1_Exon1	396	0.357313	0.254902	0.402439	0.335859	GTAAGT	6	9.48	AAG	51	3.03	0.745098	0.0196078	0	1.49085	2.82622	5.42378	1.63636	5.99495	4.79798	1.95	0.72	3	0.163783	0.76005	21.5901	19.2731	-0.0954289	0.82425	20.591
SPBC1198.11c.1	SPBC1198.11c.1_Intron3	II	193690	193809	-	119	41	1939	-148	1755	2099	1888	1515	3	1	3	SPBC1198.11c.1_Exon4	42	SPBC1198.11c.1_Exon3	1126	0.357313	0.310924	0.238095	0.373002	GTAAGC	6	8.38	CAG	119	4.79	NA	NA	NA	NA	NA	NA	2.30639	2.93162	8.81616	1.95	0.72	3	0.163783	0.76005	21.5901	19.2731	-0.0954289	0.82425	20.591
SPBC1198.12.1	SPBC1198.12.1_Intron1	II	194798	194844	+	46	121	1145	121	1145	1312	1266	1266	1	1	1	SPBC1198.12.1_Exon1	122	SPBC1198.12.1_Exon2	1146	0.410061	0.326087	0.42623	0.411867	GTATGT	6	8.68	CAG	46	4.79	NA	NA	NA	NA	NA	NA	NA	NA	NA	NA	NA	NA	0.451166	0.27595	3.3227	2.43039	-2.73624	5e-05	16.1945
SPBC11C11.10.1	SPBC11C11.10.1_Intron1	II	3365894	3365997	+	103	205	1175	205	1019	1483	1380	1224	1	1	1	SPBC11C11.10.1_Exon1	206	SPBC11C11.10.1_Exon2	1176	0.378287	0.252427	0.354369	0.393707	GTAAGT	6	9.48	CAG	103	4.79	0.417476	0.165049	0.281553	0.223301	0.776699	3.68932	1.73895	12.5519	11.0306	NA	NA	NA	-0.196018	0.91015	58.5733	67.0976	1.10916	0.34955	31.104
SPBC11C11.11c.1	SPBC11C11.11c.1_Intron1	II	3368204	3368245	-	41	975	1034	975	1034	2050	1821	1821	5	5	1	SPBC11C11.11c.1_Exon2	153	SPBC11C11.11c.1_Exon1	1035	0.366829	0.243902	0.398693	0.355556	GTAAGC	6	8.38	TAG	41	5.14	1.21951	0	0	3.28105	0.418301	0.359477	2.40773	0.628986	0.676329	NA	NA	NA	0.474823	0.74175	4.05356	2.91676	-3.04651	0.02295	24.0985
SPBC11C11.11c.1	SPBC11C11.11c.1_Intron3	II	3368475	3368514	-	39	706	1305	706	1305	2050	1821	1821	5	3	3	SPBC11C11.11c.1_Exon4	294	SPBC11C11.11c.1_Exon3	31	0.366829	0.307692	0.391156	0.387097	GTAATG	6	2.25	TAG	39	5.14	1.4359	0	0	2.70748	0.272109	1.2619	2.06452	0.0645161	1.87097	NA	NA	NA	0.474823	0.74175	4.05356	2.91676	-3.04651	0.02295	24.0985
SPBC11C11.11c.1	SPBC11C11.11c.1_Intron5	II	3368996	3369040	-	44	180	1826	180	1826	2050	1821	1821	5	1	5	SPBC11C11.11c.1_Exon6	181	SPBC11C11.11c.1_Exon5	133	0.366829	0.340909	0.38674	0.421053	GTATTA	6	1.68	AAG	44	3.03	NA	NA	NA	1.27624	0.127072	1.82873	3.74436	0.669173	1.64662	NA	NA	NA	0.474823	0.74175	4.05356	2.91676	-3.04651	0.02295	24.0985
SPBC11C11.11c.1	SPBC11C11.11c.1_Intron2	II	3368397	3368445	-	48	775	1227	775	1227	2050	1821	1821	5	4	2	SPBC11C11.11c.1_Exon3	31	SPBC11C11.11c.1_Exon2	153	0.366829	0.354167	0.387097	0.398693	GTAAGT	6	9.48	AAG	48	3.03	NA	NA	NA	2.06452	0.0645161	1.87097	3.28105	0.418301	0.359477	NA	NA	NA	0.474823	0.74175	4.05356	2.91676	-3.04651	0.02295	24.0985
SPBC11C11.11c.1	SPBC11C11.11c.1_Intron4	II	3368807	3368864	-	57	356	1637	356	1637	2050	1821	1821	5	2	4	SPBC11C11.11c.1_Exon5	133	SPBC11C11.11c.1_Exon4	294	0.366829	0.385965	0.421053	0.391156	GTACCG	6	0.16	TAG	57	5.14	1.15789	0	0	3.74436	0.669173	1.64662	2.70748	0.272109	1.2619	NA	NA	NA	0.474823	0.74175	4.05356	2.91676	-3.04651	0.02295	24.0985
SPBC12C2.11.1	SPBC12C2.11.1_Intron1	II	2450505	2450710	-	205	253	2414	144	2015	2872	2599	2091	2	2	1	SPBC12C2.11.1_Exon2	72	SPBC12C2.11.1_Exon1	2415	0.391365	0.268293	0.347222	0.405797	GTAAAT	6	4.54	TAG	205	5.14	NA	NA	NA	8.69444	3.94444	38.4861	9.96066	9.66087	18.7424	2.845	1.82	3.51	0.359195	0.01385	55.4792	43.2515	-0.500976	0.0014	61.2083
SPBC12C2.11.1	SPBC12C2.11.1_Intron2	II	2450781	2450849	-	68	114	2690	5	2291	2872	2599	2091	2	1	2	SPBC12C2.11.1_Exon3	115	SPBC12C2.11.1_Exon2	72	0.391365	0.264706	0.417391	0.347222	GTAAGC	6	8.38	TAG	68	5.14	1.36765	0	0.308824	0.295652	0.00869565	0.713043	8.69444	3.94444	38.4861	2.845	1.82	3.51	0.359195	0.01385	55.4792	43.2515	-0.500976	0.0014	61.2083
SPBC1347.03.1	SPBC1347.03.1_Intron1	II	4066375	4066416	+	41	82	1041	82	926	1164	1123	1008	1	1	1	SPBC1347.03.1_Exon1	83	SPBC1347.03.1_Exon2	1042	0.372852	0.243902	0.361446	0.379079	GTAAGA	6	7.8	TAG	41	5.14	NA	NA	NA	NA	NA	NA	0.452015	0.589251	0.496161	NA	NA	NA	-0.0983822	0.8111	9.21887	9.86947	-0.0424358	0.9081	10.1641
SPBC1347.07.1	SPBC1347.07.1_Intron2	II	4073951	4074032	+	81	504	1729	361	684	2314	1947	759	4	2	3	SPBC1347.07.1_Exon2	82	SPBC1347.07.1_Exon3	87	0.360847	0.283951	0.378049	0.505747	GTTAGT	6	4.67	AAG	81	3.03	1.12346	0.469136	0.432099	2.15854	2.78049	0.97561	2.44828	1.64368	6.91954	NA	NA	NA	-0.185318	0.7401	1.40398	1.59642	-0.4805	0.419	2.22737
SPBC1347.07.1	SPBC1347.07.1_Intron4	II	4074303	4074365	+	62	856	1396	713	351	2314	1947	759	4	4	1	SPBC1347.07.1_Exon4	67	SPBC1347.07.1_Exon5	1397	0.360847	0.274194	0.343284	0.381532	GTATCT	6	2.41	CAG	62	4.79	1.1129	0.5	0	1.89552	2.31343	1.49254	1.05369	1.85827	1.42305	NA	NA	NA	-0.185318	0.7401	1.40398	1.59642	-0.4805	0.419	2.22737
SPBC1347.07.1	SPBC1347.07.1_Intron1	II	4073765	4073870	+	105	318	1891	175	846	2314	1947	759	4	1	4	SPBC1347.07.1_Exon1	319	SPBC1347.07.1_Exon2	82	0.360847	0.257143	0.310345	0.378049	GTATGT	6	8.68	AAG	105	3.03	0.761905	0.219048	0.466667	0.366771	0.429467	0.448276	2.15854	2.78049	0.97561	NA	NA	NA	-0.185318	0.7401	1.40398	1.59642	-0.4805	0.419	2.22737
SPBC1347.07.1	SPBC1347.07.1_Intron3	II	4074118	4074237	+	119	671	1524	528	479	2314	1947	759	4	3	2	SPBC1347.07.1_Exon3	87	SPBC1347.07.1_Exon4	67	0.360847	0.352941	0.505747	0.343284	GTAACT	6	3.21	TAG	119	5.14	NA	NA	NA	2.44828	1.64368	6.91954	1.89552	2.31343	1.49254	NA	NA	NA	-0.185318	0.7401	1.40398	1.59642	-0.4805	0.419	2.22737
SPBC1347.12.1	SPBC1347.12.1_Intron2	II	4084027	4084096	+	69	395	1412	91	1131	1876	1725	1140	3	2	2	SPBC1347.12.1_Exon2	32	SPBC1347.12.1_Exon3	66	0.366738	0.362319	0.375	0.454545	GTATGC	6	7.58	TAG	69	5.14	NA	NA	NA	1.78125	0.09375	0.34375	NA	NA	NA	NA	NA	NA	-0.16929	0.76625	0.930796	1.04669	-3.70143	5e-05	13.6163
SPBC1347.12.1	SPBC1347.12.1_Intron3	II	4084161	4084200	+	39	529	1308	225	1027	1876	1725	1140	3	3	1	SPBC1347.12.1_Exon3	66	SPBC1347.12.1_Exon4	1309	0.366738	0.25641	0.454545	0.375859	GTATGA	6	7	CAG	39	4.79	NA	NA	NA	NA	NA	NA	0.466769	0.0878533	0.0190985	NA	NA	NA	-0.16929	0.76625	0.930796	1.04669	-3.70143	5e-05	13.6163
SPBC1347.12.1	SPBC1347.12.1_Intron1	II	4083953	4083996	+	43	321	1512	17	1231	1876	1725	1140	3	1	3	SPBC1347.12.1_Exon1	322	SPBC1347.12.1_Exon2	32	0.366738	0.348837	0.332298	0.375	GTGCGT	6	4.46	TAG	43	5.14	NA	NA	NA	NA	NA	NA	1.78125	0.09375	0.34375	NA	NA	NA	-0.16929	0.76625	0.930796	1.04669	-3.70143	5e-05	13.6163
SPBC1348.01.1	SPBC1348.01.1_Intron1	II	5940	5998	+	58	717	831	490	320	1606	1548	810	1	1	1	SPBC1348.01.1_Exon1	718	SPBC1348.01.1_Exon2	832	0.308842	0.206897	0.320334	0.30649	GTATGT	6	8.68	TAG	58	5.14	NA	NA	NA	0.327298	0.331476	1.0571	0.421875	0.433894	0.498798	NA	NA	NA	0.11068	0.6546	2.37157	2.19644	-0.963095	0.00015	4.28192
SPBC1348.07.1	SPBC1348.07.1_Intron1	II	20058	20108	+	50	664	498	418	275	1212	1162	693	1	1	1	SPBC1348.07.1_Exon1	665	SPBC1348.07.1_Exon2	499	0.317657	0.24	0.311278	0.334669	GTATGT	6	8.68	TAG	50	5.14	NA	NA	NA	0.0646617	0.0541353	0.184962	NA	NA	NA	NA	NA	NA	0.298269	1	0.481708	0.391738	-1.60648	0.0028	1.19288
SPBC1348.10c.1	SPBC1348.10c.1_Intron1	II	26355	26419	-	64	2157	201	1953	69	2422	2358	2022	1	1	1	SPBC1348.10c.1_Exon2	2158	SPBC1348.10c.1_Exon1	202	0.392651	0.265625	0.398517	0.371287	GTATGT	6	8.68	TAG	64	5.14	0.171875	0	0.296875	0.669601	0.866543	4.98146	0.168317	0.881188	0.836634	NA	NA	NA	0.620328	5e-05	6.414	4.17245	-0.404306	0.01525	5.52204
SPBC1348.11.1	SPBC1348.11.1_Intron1	II	33602	33607	+	5	372	1173	372	1173	1550	1545	1545	1	1	1	SPBC1348.11.1_Exon1	373	SPBC1348.11.1_Exon2	1174	0.383226	NA	0.353887	0.392675	NA	NA	NA	NA	NA	NA	NA	NA	NA	NA	NA	NA	0.00340716	0.011925	0.118399	NA	NA	NA	0.0392886	1	0.111011	0.108029	0.904723	1	0.057702
SPBC1348.12.1	SPBC1348.12.1_Intron3	II	35883	35927	+	44	772	662	772	662	1478	1152	1152	4	3	2	SPBC1348.12.1_Exon3	137	SPBC1348.12.1_Exon4	199	0.357916	0.363636	0.343066	0.396985	GTATAC	6	2.65	TAG	44	5.14	0.272727	0.681818	0.590909	0.175182	0.248175	0.0218978	NA	NA	NA	NA	NA	NA	0.695342	0.06135	1.47295	0.909641	-0.873249	0.02105	1.66627
SPBC1348.12.1	SPBC1348.12.1_Intron4	II	36125	36233	+	108	1014	356	1014	356	1478	1152	1152	4	4	1	SPBC1348.12.1_Exon4	199	SPBC1348.12.1_Exon5	357	0.357916	0.305556	0.396985	0.37535	GTAAAA	6	2.87	TAG	108	5.14	NA	NA	NA	NA	NA	NA	NA	NA	NA	NA	NA	NA	0.695342	0.06135	1.47295	0.909641	-0.873249	0.02105	1.66627
SPBC1348.12.1	SPBC1348.12.1_Intron1	II	35171	35210	+	39	60	1379	60	1379	1478	1152	1152	4	1	4	SPBC1348.12.1_Exon1	61	SPBC1348.12.1_Exon2	403	0.357916	0.25641	0.278689	0.37469	GTGTAG	6	-2.03	AAG	39	3.03	NA	NA	NA	NA	NA	NA	0.220844	0.17866	0.1067	NA	NA	NA	0.695342	0.06135	1.47295	0.909641	-0.873249	0.02105	1.66627
SPBC1348.12.1	SPBC1348.12.1_Intron2	II	35612	35747	+	135	501	842	501	842	1478	1152	1152	4	2	3	SPBC1348.12.1_Exon2	403	SPBC1348.12.1_Exon3	137	0.357916	0.348148	0.37469	0.343066	GTAGGA	6	4.81	AAG	135	3.03	NA	NA	NA	0.220844	0.17866	0.1067	0.175182	0.248175	0.0218978	NA	NA	NA	0.695342	0.06135	1.47295	0.909641	-0.873249	0.02105	1.66627
SPBC13E7.05.1	SPBC13E7.05.1_Intron1	II	3050193	3050243	+	50	2328	261	2214	234	2639	2589	2448	1	1	1	SPBC13E7.05.1_Exon1	2329	SPBC13E7.05.1_Exon2	262	0.330428	0.28	0.336625	0.28626	GTATGT	6	8.68	TAG	50	5.14	1.06	0.2	0	3.39588	1.44654	4.07986	1.62977	2.42748	2.3626	1.94	0.02	1.355	-0.082711	0.56615	9.50351	10.0643	-1.85035	5e-05	36.2906
SPBC13E7.09.1	SPBC13E7.09.1_Intron1	II	3056273	3056325	+	52	985	2478	799	131	3515	3346	930	3	1	3	SPBC13E7.09.1_Exon1	986	SPBC13E7.09.1_Exon2	760	0.385206	0.25	0.466531	0.315789	GTAAGT	6	9.48	TAG	52	5.14	0.134615	0.0576923	0.25	1.5568	2.52333	14.7606	0.944737	0.907895	3.38947	NA	NA	NA	0.521682	0.19465	3.24368	2.25941	-0.946398	0.01625	4.35401
[truncated: 4,783 more rows]
[truncated: 68 more columns]

## Sheet: TableS7 (validation Fig. S2)
id.intron	mean_n	mean_m	sd_n	sd_m	RT-PCR replicate 1	RT-PCR replicate 2	RT-PCR replicate 3	average	sd	position in transcript	number of introns	comment
[truncated: 33 more rows]

[truncated: 2 more sheets: TableS8 (genes shown in Fig.7) , Table S9 (42 features)]
